# Supplementary material for: Prevalence of SARS-CoV-2 Variants of Concern and Variants of Interest in COVID-19 Breakthrough Infections in a Hospital in Monterrey, Mexico
Source: MDPI journal article supplement (doi:10.3390/v14010154), 2022-01-14
Supplement: s1 [file s1]

**Supplementary Table S2.** Clinical characteristics of breakthrough infection cases from this study.

| Patient | Group | Age (years) | Sex | Hypertension | Diabetes mellitus type II | Obesity | Smoking | Supplementary oxygen at arrival time | High-flow O <sub>2</sub> | Clinical outcome | Vaccine administered                            | Date of vaccination |             | Date of onset of symptoms | Percentage of SARS-CoV-2 genome sequenced | Pango lineage | Variant |
|---------|-------|-------------|-----|--------------|---------------------------|---------|---------|--------------------------------------|--------------------------|------------------|-------------------------------------------------|---------------------|-------------|---------------------------|-------------------------------------------|---------------|---------|
|         |       |             |     |              |                           |         |         |                                      |                          |                  |                                                 | 1st dose            | 2nd dose    |                           |                                           |               |         |
| 34797   | H     | 74          | F   | No           | No                        | No      | No      | Yes                                  | Yes                      | Death            | Pfizer/BioNTech                                 | Apr-21              | No          | 4/19/2021                 | 99.6                                      | B.1           |         |
| 35194   | H     | 68          | F   | Yes          | No                        | No      | No      | No                                   | No                       | Cure             | Unspecified                                     | Apr-21              | No          | 4/24/2021                 | 99.6                                      | B.1.1.519     |         |
| 37613   | H     | 70          | M   | Yes          | Yes                       | No      | No      | Yes                                  | Yes                      | Cure             | Sinovac Astra Zeneca/Oxford                     | Unspecified         | Apr-21      | 5/31/2021                 | 92.1                                      | P.1           | Gamma   |
| 39540   | H     | 69          | M   | Yes          | No                        | No      | Yes     | No                                   | Yes                      | Death            |                                                 | Mar-21              | May-21      | 6/28/2021                 | 99.6                                      | B.1.617.2     | Delta   |
| 39690   | H     | 54          | F   | No           | No                        | No      | No      | Yes                                  | Yes                      | Cure             | Unspecified                                     | May-21              | No          | 6/30/2021                 | 99.6                                      | B.1.628       |         |
| 40042   | H     | 50          | M   | Yes          | No                        | No      | Yes     | No                                   | No                       | Death            | Sinovac                                         | Jun-21              | No          | 7/5/2021                  | 97.8                                      | B.1.621       | Mu      |
| 40162   | H     | 71          | M   | Yes          | Yes                       | No      | Yes     | Yes                                  | Yes                      | Cure             | Sinovac                                         | Apr-21              | Apr-21      | 7/6/2021                  | 98.7                                      | B.1.632       |         |
| 40363   | H     | 52          | M   | No           | Yes                       | No      | No      | Yes                                  | Yes                      | Cure             | CanSino                                         | May-21              | NA          | 7/9/2021                  | 98.7                                      | B.1.621       | Mu      |
| 40373   | H     | 49          | F   | No           | No                        | No      | No      | Yes                                  | Yes                      | Cure             | CanSino                                         | Apr-21              | NA          | 7/9/2021                  | 96.8                                      | AY.3          | Delta   |
| 40507   | H     | 64          | M   | Yes          | Yes                       | No      | No      | Yes                                  | Yes                      | Cure             | Sinovac Pfizer/BioNTech                         | Unspecified         | Jun-21      | 7/10/2021                 | 83.9                                      | B.1.1.7       | Alpha   |
| 40635   | H     | 69          | F   | No           | No                        | No      | No      | Yes                                  | Yes                      | Cure             |                                                 | Unspecified         | Mar-21      | 7/12/2021                 | 98.7                                      | AY.4          | Delta   |
| 41494   | H     | 43          | M   | No           | No                        | No      | No      | Yes                                  | No                       | Cure             | CanSino Astra Zeneca/Oxford                     | Apr-21              | NA          | 7/20/2021                 | 90.6                                      | AY.3          | Delta   |
| 41638   | H     | 60          | M   | Yes          | Yes                       | No      | No      | Yes                                  | Yes                      | Cure             | Pfizer/BioNTech Astra Zeneca/Oxford             | Apr-21              | May-21      | 7/21/2021                 | 98.7                                      | AY.11         | Delta   |
| 41779   | H     | 75          | F   | Yes          | Yes                       | No      | No      | Yes                                  | No                       | Cure             | BioNTech Astra Zeneca/Oxford                    | Jan-21              | Jan-21      | 7/21/2021                 | 98.7                                      | AY.4          | Delta   |
| 42266   | H     | 70          | F   | Yes          | Yes                       | No      | No      | Yes                                  | Yes                      | Cure             |                                                 | Jun-21              | Jun-21      | 7/26/2021                 | 98.7                                      | B.1.617.2     | Delta   |
| 42271   | H     | 58          | M   | No           | Yes                       | No      | No      | Yes                                  | Yes                      | Cure             | Astra Zeneca/Oxford                             | May-21              | No          | 7/26/2021                 | 98.7                                      | AY.3          | Delta   |
| 42690   | H     | 50          | M   | No           | No                        | Yes     | Yes     | Yes                                  | Yes                      | Cure             | CanSino Pfizer/BioNTech                         | Apr-21              | NA          | 7/29/2021                 | 98.7                                      | AY.11         | Delta   |
| 43093   | H     | 72          | F   | Yes          | Yes                       | No      | No      | No                                   | No                       | Cure             |                                                 | Unspecified         | Feb-21      | 8/1/2021                  | 99.6                                      | P.1           | Gamma   |
| 43367   | H     | 65          | M   | No           | No                        | No      | No      | No                                   | Yes                      | Cure             | Sinovac                                         | Unspecified         | Jun-21      | 8/3/2021                  | 98.7                                      | AY.11         | Delta   |
| 43383   | H     | 44          | F   | No           | Yes                       | No      | No      | Yes                                  | No                       | Cure             | Unspecified Pfizer/BioNTech Astra Zeneca/Oxford | Unspecified         | Jul-21      | 8/3/2021                  | 98.7                                      | AY.11         | Delta   |
| 43405   | H     | 40          | M   | No           | Yes                       | No      | No      | No                                   | No                       | Cure             |                                                 | Unspecified         | Aug-21      | 8/3/2021                  | 98.7                                      | AY.11         | Delta   |
| 43678   | H     | 54          | F   | No           | Yes                       | No      | No      | No                                   | No                       | Cure             |                                                 | Jun-21              | No          | 8/5/2021                  | 98.7                                      | AY.4          | Delta   |
| 43680   | H     | 52          | F   | Yes          | Yes                       | No      | No      | No                                   | No                       | Death            | Sinovac                                         | Unspecified         | Unspecified | 8/5/2021                  | 98.7                                      | AY.4          | Delta   |
| 40278   | A     | 42          | F   | No           | No                        | No      | No      | NA                                   | NA                       | NA               | CanSino Astra Zeneca/Oxford                     | Apr-21              | NA          | 7/8/2021                  | 90.3                                      | B.1.617.2     | Delta   |
| 40281   | A     | 71          | M   | No           | No                        | No      | No      | NA                                   | NA                       | NA               |                                                 | Mar-21              | Apr-21      | 7/8/2021                  | 99.6                                      | B.1.621       | Mu      |
| 40282   | A     | 31          | M   | No           | No                        | No      | No      | NA                                   | NA                       | NA               | CanSino                                         | May-21              | NA          | 7/8/2021                  | 99.6                                      | B.1.617.2     | Delta   |
| 40287   | A     | 37          | F   | No           | No                        | No      | No      | NA                                   | NA                       | NA               | CanSino                                         | Apr-21              | NA          | 7/8/2021                  | 98.6                                      | B.1.1.7       | Alpha   |
| 40292   | A     | 52          | F   | No           | No                        | Yes     | No      | NA                                   | NA                       | NA               | CanSino                                         | Apr-21              | NA          | 7/8/2021                  | 99.6                                      | P.1           | Gamma   |
| 40367   | A     | 51          | F   | No           | No                        | No      | No      | NA                                   | NA                       | NA               | CanSino                                         | Mar-21              | NA          | 7/9/2021                  | 98.7                                      | AY.4          | Delta   |
| 40394   | A     | 24          | F   | No           | No                        | No      | No      | NA                                   | NA                       | NA               | CanSino                                         | Apr-21              | NA          | 7/9/2021                  | 90.2                                      | B.1.617.2     | Delta   |

|       |   |    |   |     |     |     |     |    |    |    |                                    |        |        |           |      |           |       |
|-------|---|----|---|-----|-----|-----|-----|----|----|----|------------------------------------|--------|--------|-----------|------|-----------|-------|
| 40515 | A | 28 | F | No  | No  | No  | No  | NA | NA | NA | CanSino<br>Pfizer/<br>BioNTech     | May-21 | NA     | 7/10/2021 | 79.2 | B.1.1.7   | Alpha |
| 40518 | A | 29 | M | No  | No  | No  | Yes | NA | NA | NA |                                    | Feb-21 | Mar-21 | 7/10/2021 | 91.7 | AY.3      | Delta |
| 40522 | A | 53 | F | Yes | Yes | No  | No  | NA | NA | NA | Sinovac<br>Astra Zeneca/<br>Oxford | Apr-21 | May-21 | 7/10/2021 | 86.7 | P.1.1     | Gamma |
| 40523 | A | 71 | F | Yes | No  | No  | No  | NA | NA | NA |                                    | Apr-21 | May-21 | 7/10/2021 | 96.7 | B.1.617.2 | Delta |
| 40580 | A | 43 | F | Yes | No  | No  | No  | NA | NA | NA | CanSino<br>Astra Zeneca/<br>Oxford | Apr-21 | NA     | 7/11/2021 | 98.7 | B.1.617.2 | Delta |
| 40585 | A | 56 | F | No  | Yes | No  | No  | NA | NA | NA |                                    | Jun-21 | No     | 7/11/2021 | 98.7 | B.1.617.2 | Delta |
| 40614 | A | 57 | F | No  | No  | No  | No  | NA | NA | NA | Sinovac                            | May-21 | Jun-21 | 7/12/2021 | 98.7 | B.1.617.2 | Delta |
| 40617 | A | 28 | M | No  | No  | No  | No  | NA | NA | NA | CanSino                            | Apr-21 | NA     | 7/12/2021 | 96.8 | B.1.617.2 | Delta |
| 40624 | A | 34 | F | No  | No  | No  | No  | NA | NA | NA | CanSino                            | Apr-21 | NA     | 7/12/2021 | 92.8 | B.1.617.2 | Delta |
| 40625 | A | 27 | F | No  | No  | No  | No  | NA | NA | NA | CanSino                            | Mar-21 | NA     | 7/12/2021 | 99.6 | B.1.621   | Mu    |
| 40627 | A | 45 | F | No  | No  | Yes | No  | NA | NA | NA | CanSino                            | Apr-21 | NA     | 7/12/2021 | 98.0 | B.1.617.2 | Delta |
| 40707 | A | 20 | F | No  | No  | No  | No  | NA | NA | NA | CanSino                            | Apr-21 | NA     | 7/13/2021 | 98.7 | B.1.617.2 | Delta |
| 40712 | A | 24 | M | No  | No  | No  | No  | NA | NA | NA | CanSino                            | May-21 | NA     | 7/13/2021 | 96.8 | B.1.617.2 | Delta |
| 40732 | A | 54 | M | No  | No  | No  | No  | NA | NA | NA | Sinovac                            | Mar-21 | Apr-21 | 7/13/2021 | 98.7 | B.1.618   |       |
| 40735 | A | 58 | M | Yes | Yes | No  | No  | NA | NA | NA | CanSino                            | Apr-21 | NA     | 7/13/2021 | 98.7 | B.1       |       |
| 40737 | A | 27 | M | No  | No  | No  | No  | NA | NA | NA | CanSino                            | Apr-21 | NA     | 7/13/2021 | 96.7 | AY.3      | Delta |
| 40812 | A | 29 | M | No  | No  | No  | No  | NA | NA | NA | CanSino                            | Apr-21 | NA     | 7/14/2021 | 97.8 | AY.3      | Delta |
| 40819 | A | 40 | M | No  | No  | No  | No  | NA | NA | NA | CanSino                            | Apr-21 | NA     | 7/14/2021 | 98.7 | AY.3      | Delta |
| 40826 | A | 71 | F | No  | Yes | No  | No  | NA | NA | NA | CanSino<br>Pfizer/<br>BioNTech     | Apr-21 | May-21 | 7/14/2021 | 97.8 | AY.3      | Delta |
| 40833 | A | 21 | M | No  | No  | No  | No  | NA | NA | NA | CanSino                            | Apr-21 | NA     | 7/14/2021 | 97.7 | B.1.617.2 | Delta |
| 40834 | A | 75 | M | Yes | Yes | No  | No  | NA | NA | NA | CanSino<br>Pfizer/<br>BioNTech     | Apr-21 | May-21 | 7/14/2021 | 98.6 | B.1.617.2 | Delta |
| 40875 | A | 59 | F | No  | No  | No  | No  | NA | NA | NA | Sinovac                            | Apr-21 | May-21 | 7/14/2021 | 98.7 | AY.3      | Delta |
| 40884 | A | 27 | M | No  | No  | No  | No  | NA | NA | NA | CanSino                            | Apr-21 | NA     | 7/14/2021 | 98.7 | B.1.617.2 | Delta |

H: Hospitalized; A: Ambulatory; M: Male; F: Female; NA: Not applied.
