# Supplementary material for: Prevalence of SARS-CoV-2 Variants of Concern and Variants of Interest in COVID-19 Breakthrough Infections in a Hospital in Monterrey, Mexico
Source: MDPI journal article supplement (doi:10.3390/v14010154), 2022-01-14
Supplement: s1 [file s1]

We gratefully acknowledge the following Authors from the Originating laboratories responsible for obtaining the specimens, as well as the Submitting laboratories where the genome data were generated and shared via GISAID, on which this research is based.

All Submitters of data may be contacted directly via [www.gisaid.org](http://www.gisaid.org)

Authors are sorted alphabetically.

| Accession ID                                                                                                                                      | Originating Laboratory                                                                                                                                                 | Submitting Laboratory                                                                                                                                                                                                                                                                                                                                                     | Authors                                                                                                                                                                                                                                                                                                                                                                                                                                              |
|---------------------------------------------------------------------------------------------------------------------------------------------------|------------------------------------------------------------------------------------------------------------------------------------------------------------------------|---------------------------------------------------------------------------------------------------------------------------------------------------------------------------------------------------------------------------------------------------------------------------------------------------------------------------------------------------------------------------|------------------------------------------------------------------------------------------------------------------------------------------------------------------------------------------------------------------------------------------------------------------------------------------------------------------------------------------------------------------------------------------------------------------------------------------------------|
| EPI_ISL_3812643                                                                                                                                   | *AR Dept. of Health-PHL, Molecular Diagnostics*                                                                                                                        | Centers for Disease Control and Prevention Division of Viral Diseases, Pathogen Discovery                                                                                                                                                                                                                                                                                 | Alex Burgin; Ben Rambo-Martin; Clinton Paden; Dakota Howard; Dave Wentworth; Dhvani Batra; Jasmine Padilla; Justin Lee; Krista Queen; Kristen Knipe; Kristine Lacek; Mark Burroughs; Matthew Schmerer; Meghan Bentz; Mili Sheth; Peter Cook; Sam Shepard; Sarah Nobles; Suxiang Tong; Vivien Dugan; Yvette Unoarumhi                                                                                                                                 |
| EPI_ISL_707700, EPI_ISL_733499                                                                                                                    | 1-Laboratory of Microbiology, National Reference Lab, Charles Nicolle Hospital; 2- University of Tunis ElManar, Faculty of Medicine of Tunis, LR99E509, Tunis, Tunisia | 1-Clinical and Experimental Pharmacology Lab, LR16SP02, National Center of Pharmacovigilance, University of Tunis El Manar, Tunis, Tunisia. 2- Neurodegenerative diseases and psychiatric troubles, LR18SP03, Razi Hospital, University of Tunis El Manar, Tunis, Tunisia. 3- Ministry of Health, National Observatory of New and Emerging Diseases, 1006, Tunis, Tunisia | Alia Ben Kahla; Asma Ferjani; Gaies Emna; Guedi Ali Barreh; Habiba Ben Romdhane; Hanen El Jebbar; Ilhem Boutiba-Ben Boubaker; Jalila Ben Khellil; Maher Kharraat; Mouna Ben Sassi; Mouna Safer; Nissaf Ben Alaya; Riadh Daghfous; Riadh Gouider.; Rouaa Ben Othman; Salma Abidi; Sameh Trabelsi; Sana Ferjani; Sarra Chamman; Souissi Amira; Zaineb Hamzaoui                                                                                         |
| EPI_ISL_2448983                                                                                                                                   | 105 Kresoway Szpital Wojskowy SP ZOZ w Zarach Filia w Zaganiu                                                                                                          | 1. National Institute of Public Health - National Institute of Hygiene, Warsaw, Poland 2. Biobank Lab, University of Lodz 3. Laboratory of Respiratory Viruses, Teaching and Clinical Center of the Medical University of Lodz                                                                                                                                            | Dominik Strapagiel; Izabela Dróżdż; Jakub Lach; Katarzyna Zacharczuk; Klaudyna Królikowska; Maciej Borowiec; Magdalena Nowakowska; Magdalena Traczky-Borszyńska; Marcin Słomka; Marta Sobalska-Kwapis; Małgorzata Sadkowska-Todys; Tomasz Płoszaj; Tomasz Wolkowicz                                                                                                                                                                                  |
| EPI_ISL_3545486, EPI_ISL_3545517                                                                                                                  | 34, Alex. Fleming Str., 16672 Vari, Athens, Greece                                                                                                                     | Central National Laboratory ,Public Health Organization                                                                                                                                                                                                                                                                                                                   | A.Katsoulidou et al; G.Spanakos; Kyriaki Tryfinopoulou                                                                                                                                                                                                                                                                                                                                                                                               |
| EPI_ISL_3186960, EPI_ISL_3465560, EPI_ISL_3539394                                                                                                 | 4Cyte Pathology                                                                                                                                                        | NSW Health Pathology - Institute of Clinical Pathology and Medical Research; Westmead Hospital; University of Sydney                                                                                                                                                                                                                                                      | Arnott A.; Draper J.; Gall M.; Martinez E.; Rockett R.; Sintchenko V.; on behalf of ICPMR                                                                                                                                                                                                                                                                                                                                                            |
| EPI_ISL_3717101, EPI_ISL_3717111, EPI_ISL_3717113                                                                                                 | 54gene COVID-19 Laboratory, Nigeria                                                                                                                                    | 54gene Molecular Genetics Laboratory, Nigeria                                                                                                                                                                                                                                                                                                                             | Bankole Johnson; Chiamaka Nwuba; Chinenye Akpulu; Chinyere Anyika; Dr Abasi Ene Obong; Dr Colm O'Dushlaine; Dr Olajumoke Popoola; Dr Olukunke Oluwasemowo; Ifunanya Egoh; Lagos State Government; Nigerian Centre for Disease Control; Ofonime Ebong; Oluwatimilehin Adewumi; Tomiwa Adepetun                                                                                                                                                        |
| EPI_ISL_729367, EPI_ISL_729568                                                                                                                    | A. Krumbholz, Labor Dr. Krause und Kollegen MVZ GmbH, Kiel                                                                                                             | Charité Universitätsmedizin Berlin, Institut für Virologie                                                                                                                                                                                                                                                                                                                | Barbara Mühlemann; Christian Drosten; Julia Schneider; Jörn Beheim-Schwarzbach; Talitha Veith; Terry Jones; Victor M Corman                                                                                                                                                                                                                                                                                                                          |
| EPI_ISL_3275166                                                                                                                                   | AA. Rasdhoo                                                                                                                                                            | Indira Gandhi Memorial Hospital                                                                                                                                                                                                                                                                                                                                           | Dr. Milza Abdul Muhsin; Mr. Ibrahim Nishan Ahmed; Ms. Aishath Shuhudha; Ms. Aminath Nazfa; Ms. Fathimath Zimna                                                                                                                                                                                                                                                                                                                                       |
| EPI_ISL_498523, EPI_ISL_498534, EPI_ISL_498540, EPI_ISL_498543, EPI_ISL_498546, EPI_ISL_735503, EPI_ISL_1208402, EPI_ISL_1807318, EPI_ISL_3404995 | ACT Pathology                                                                                                                                                          | Schwessinger Lab                                                                                                                                                                                                                                                                                                                                                          | Ashley Jones; Benjamin Schwessinger; Craig Kennedy; Emma Crean; Karina Kennedy; Kevin Murray; Megan McDonald; Ming-Dao Chia; Robert Lanfear; Robyn N Hall                                                                                                                                                                                                                                                                                            |
| EPI_ISL_3276535                                                                                                                                   | ADILAB                                                                                                                                                                 | Universidad Nacional de Colombia - Laboratorio Genómico One Health                                                                                                                                                                                                                                                                                                        | Andres F. Cardona-Rios; Carlos Franco-Muñoz; Carolina Muñoz-Arango; Celeny Ortiz; Daniel O. Maldonado-Perez; Diego A. Álvarez-Díaz; Hector Alejandro Ruiz-Moreno; Idabely Betancur Ortiz; Jorge E. Osorio; Juan P. Hernandez-Ortiz; Karl A Ciuderis; Katherine Laiton-Donato; Laura Silvana Perez; Lina M. Hurtado; Marcela Mercado-Reyes; Maria Angélica Maya; Maria Stella López; Rita Almanza Payares; Sandra Ines Cano; Simón Villegas Velásquez |
| EPI_ISL_3118670                                                                                                                                   | AFRICA_CDC - Angola                                                                                                                                                    | KRISP, K2n Research Innovation and Sequencing Platform                                                                                                                                                                                                                                                                                                                    | Emmanuel SJ; Giandhari J; Lessells R; Pillay S; Tegally H; Wilkinson E; Yajna R; de Oliveira T                                                                                                                                                                                                                                                                                                                                                       |
| EPI_ISL_778826                                                                                                                                    | AIID                                                                                                                                                                   | Irish Coronavirus Sequencing Consortium-Teagasc Grange                                                                                                                                                                                                                                                                                                                    | Aljandro Abner Garcia Leon; Calum Walsh; Fiona Crispie; Gabriel Gonzalez; John Kenny; Matthew McCabe; Michael Carr; Patrick Mallon; Paul Cotter                                                                                                                                                                                                                                                                                                      |
| EPI_ISL_1220052                                                                                                                                   | ANALICEMOS LABORATORIO ESPECIALIZADO                                                                                                                                   | Instituto Nacional de Salud- Dirección de Investigación en Salud Pública                                                                                                                                                                                                                                                                                                  | Carlos Franco-Muñoz; Diego A. Álvarez-Díaz; Diego Andrés Prada; Gerardo Santamaría; Hector Alejandro Ruiz-Moreno; Jhonnatan Reales-González; Julian Naizaque; Katherine Laiton-Donato; Magdalena Wiesner; Marcela Mercado-Reyes.; Maria T. Herrera-Sepúlveda; Martha Lucia Ospina Martínez; Sheryll Corchuelo                                                                                                                                        |
| EPI_ISL_3071138, EPI_ISL_3155073, EPI_ISL_3155074, EPI_ISL_3155339                                                                                | ANOUAL                                                                                                                                                                 | ANOUAL                                                                                                                                                                                                                                                                                                                                                                    | Farah Joui; Fatima Zahra El ansari; Fatima zahra El ansari; Fatima zahra el ansari; Fekkak Jamal.; Jamal Fekkak.; Mohcine Bennani Mechita; Rachid Benhida; Yassine Kasmi                                                                                                                                                                                                                                                                             |
| EPI_ISL_3037812                                                                                                                                   | AREA DE SALUD BAGACES                                                                                                                                                  | Incienza, Instituto Costarricense de Investigación y Enseñanza en Nutrición y Salud                                                                                                                                                                                                                                                                                       | Adriana Godínez; Caterina Guzmán; Claudio Soto-Garita; Estela Cordero; Francisco Duarte; Hebleen Porras; José Luis Vargas; Mariela Gutiérrez-Joselyn Prado; Melany Calderón; Nazareth Ruiz & Adriana Bermúdez                                                                                                                                                                                                                                        |
| EPI_ISL_2827995                                                                                                                                   | AREA DE SALUD CARTAGO                                                                                                                                                  | Incienza, Instituto Costarricense de Investigación y Enseñanza en Nutrición y Salud                                                                                                                                                                                                                                                                                       | Adriana Godínez; Claudio Soto-Garita; Estela Cordero; Francisco Duarte; Hebleen Porras; Joselyn Prado & Monserrat Segura; José Luis Vargas; Mariela Gutiérrez; Melany Calderón                                                                                                                                                                                                                                                                       |
| EPI_ISL_2502735                                                                                                                                   | AREA DE SALUD CATEDRAL NORESTE                                                                                                                                         | Incienza, Instituto Costarricense de Investigación y Enseñanza en Nutrición y Salud                                                                                                                                                                                                                                                                                       | Adriana Godínez; Claudio Soto-Garita; Estela Cordero; Francisco Duarte; Hebleen Porras; Jose Luis Vargas; Joselyn Prado & Mariel López; Mariela Gutierrez; Melany CalderOn                                                                                                                                                                                                                                                                           |
| EPI_ISL_3639052                                                                                                                                   | AREA DE SALUD CAÑAS                                                                                                                                                    | Incienza, Instituto Costarricense de Investigación y Enseñanza en Nutrición y Salud                                                                                                                                                                                                                                                                                       | Adriana Godínez; Claudio Soto-Garita; Estela Cordero; Francisco Duarte; Hebleen Porras; Joselyn Prado & Adriana Bermúdez; José Luis Vargas; Mariela Gutiérrez; Melany Calderón                                                                                                                                                                                                                                                                       |
| EPI_ISL_1201437, EPI_ISL_3464520                                                                                                                  | AREA DE SALUD COTO BRUS                                                                                                                                                | Incienza, Instituto Costarricense de Investigación y Enseñanza en Nutrición y Salud                                                                                                                                                                                                                                                                                       | Adriana Godínez; Claudio Soto-Garita; Estela Cordero; Francisco Duarte; Hebleen Porras; Joselyn Prado & Yendri Ramirez Alpizar; José Luis Vargas; Mariela Gutiérrez; Melany Calderón; Melany Calderón & Mónica Charpentier-Artavia                                                                                                                                                                                                                   |
| EPI_ISL_2658276                                                                                                                                   | AREA DE SALUD EL GUARCO                                                                                                                                                | Incienza, Instituto Costarricense de Investigación y Enseñanza en Nutrición y Salud                                                                                                                                                                                                                                                                                       | Adriana Godínez; Claudio Soto-Garita; Estela Cordero; Francisco Duarte; Hebleen Porras; Joselyn Prado & Pamela Serrano Valerín; José Luis Vargas; Mariela Gutiérrez; Melany Calderón                                                                                                                                                                                                                                                                 |
| EPI_ISL_3026022                                                                                                                                   | AREA DE SALUD EL GUARCO [EL GUARCO/CARTAGO]                                                                                                                            | Incienza, Instituto Costarricense de Investigación y Enseñanza en Nutrición y Salud                                                                                                                                                                                                                                                                                       | Adriana Godínez; Caterina Guzmán; Claudio Soto-Garita; Estela Cordero; Francisco Duarte; Hebleen Porras; Joselyn Prado; José Luis Vargas; Mariela Gutiérrez; Melany Calderón; Nazareth Ruiz & Mónica Charpentier                                                                                                                                                                                                                                     |
| EPI_ISL_3298354                                                                                                                                   | AREA DE SALUD FORTUNA                                                                                                                                                  | Incienza, Instituto Costarricense de Investigación y Enseñanza en Nutrición y Salud                                                                                                                                                                                                                                                                                       | Adriana Godínez; Claudio Soto-Garita; Estela Cordero; Francisco Duarte; Hebleen Porras; Joselyn Prado & Carolina Arrieta; José Luis Vargas; Mariela Gutiérrez; Melany Calderón                                                                                                                                                                                                                                                                       |
| EPI_ISL_2502736                                                                                                                                   | AREA DE SALUD GUATUSO                                                                                                                                                  | Incienza, Instituto Costarricense de Investigación y Enseñanza en Nutrición y Salud                                                                                                                                                                                                                                                                                       | Adriana Godínez; Claudio Soto-Garita; Estela Cordero; Francisco Duarte; Hebleen Porras; Jose Luis Vargas; Joselyn Prado & Francisco ChacOn-Valverde; Mariela Gutierrez; Melany CalderOn                                                                                                                                                                                                                                                              |
| EPI_ISL_3639156                                                                                                                                   | AREA DE SALUD LIMON                                                                                                                                                    | Incienza, Instituto Costarricense de Investigación y Enseñanza en Nutrición y Salud                                                                                                                                                                                                                                                                                       | Adriana Godínez; Claudio Soto-Garita; Estela Cordero; Francisco Duarte; Hebleen Porras; Joselyn Prado & Jose Zúñiga; José Luis Vargas; Mariela Gutiérrez; Melany Calderón                                                                                                                                                                                                                                                                            |
| EPI_ISL_3037804                                                                                                                                   | AREA DE SALUD OSA                                                                                                                                                      | Incienza, Instituto Costarricense de Investigación y Enseñanza en Nutrición y Salud                                                                                                                                                                                                                                                                                       | Adriana Godínez; Caterina Guzmán; Claudio Soto-Garita; Estela Cordero; Francisco Duarte; Hebleen Porras; José Luis Vargas; Mariela Gutiérrez-Joselyn Prado; Melany Calderón; Nazareth Ruiz & Mariamiliia Cob                                                                                                                                                                                                                                         |
| EPI_ISL_2502727                                                                                                                                   | AREA DE SALUD SAN JUAN-SAN DIEGO- CONCEPCION 2                                                                                                                         | Incienza, Instituto Costarricense de Investigación y Enseñanza en Nutrición y Salud                                                                                                                                                                                                                                                                                       | Adriana Godínez; Claudio Soto-Garita; Estela Cordero; Francisco Duarte; Hebleen Porras; Jose Luis Vargas; Joselyn Prado & Mariel López; Mariela Gutierrez; Melany CalderOn                                                                                                                                                                                                                                                                           |
| EPI_ISL_3638820                                                                                                                                   | AREA DE SALUD SAN JUAN-SAN DIEGO- CONCEPCION 2                                                                                                                         | Incienza, Instituto Costarricense de Investigación y Enseñanza en Nutrición y Salud                                                                                                                                                                                                                                                                                       | Adriana Godínez; Claudio Soto-Garita; Estela Cordero; Francisco Duarte; Hebleen Porras; José Luis Vargas; Mariela Gutiérrez & Joselyn Prado; Melany Calderón                                                                                                                                                                                                                                                                                         |
| EPI_ISL_2502737                                                                                                                                   | AREA DE SALUD SIQUIRRES                                                                                                                                                | Incienza, Instituto Costarricense de Investigación y Enseñanza en Nutrición y Salud                                                                                                                                                                                                                                                                                       | Adriana Godínez; Claudio Soto-Garita; Estela Cordero; Francisco Duarte; Hebleen Porras; Jose Luis Vargas; Joselyn Prado & Ileana Cháves-Peraza; Mariela Gutierrez; Melany CalderOn                                                                                                                                                                                                                                                                   |
| EPI_ISL_3638878                                                                                                                                   | AREA DE SALUD SIQUIRRES                                                                                                                                                | Incienza, Instituto Costarricense de Investigación y Enseñanza en Nutrición y Salud                                                                                                                                                                                                                                                                                       | Adriana Godínez; Claudio Soto-Garita; Estela Cordero; Francisco Duarte; Hebleen Porras; José Luis Vargas; Mariela Gutiérrez & Joselyn Prado; Melany Calderón                                                                                                                                                                                                                                                                                         |
| EPI_ISL_3037839                                                                                                                                   | AREA DE SALUD SIQUIRRES [SIQUIRRES/LIMON]                                                                                                                              | Incienza, Instituto Costarricense de Investigación y Enseñanza en Nutrición y Salud                                                                                                                                                                                                                                                                                       | Adriana Godínez; Caterina Guzmán; Claudio Soto-Garita; Estela Cordero; Francisco Duarte; Hebleen Porras; José Luis Vargas; Mariela Gutiérrez-Joselyn Prado; Melany Calderón; Nazareth Ruiz & Ileana Chavez Peraza                                                                                                                                                                                                                                    |
| EPI_ISL_914804                                                                                                                                    | AREA DE SALUD TURRIALBA-JIMENEZ                                                                                                                                        | Incienza, Instituto Costarricense de Investigación y Enseñanza en Nutrición y Salud                                                                                                                                                                                                                                                                                       | Adriana Godínez; Claudio Soto-Garita; Estela Cordero; Francisco Duarte; Hebleen Porras; Melany Calderón & Mónica Charpentier-Artavia                                                                                                                                                                                                                                                                                                                 |
| EPI_ISL_2658269                                                                                                                                   | AREA DE SALUD ZAPOTE-CATEDRAL - CLINICA DR. CARLOS DURAN                                                                                                               | Incienza, Instituto Costarricense de Investigación y Enseñanza en Nutrición y Salud                                                                                                                                                                                                                                                                                       | Adriana Godínez; Claudio Soto-Garita; Estela Cordero; Francisco Duarte; Hebleen Porras; Joselyn Prado & Andony Cordero-Jiménez; José Luis Vargas; Mariela Gutiérrez; Melany Calderón                                                                                                                                                                                                                                                                 |
| EPI_ISL_2248967                                                                                                                                   | ARS Algarve - Laboratorio Laura Ayres                                                                                                                                  | Instituto Nacional de Saude (INSA)                                                                                                                                                                                                                                                                                                                                        | Borges et al                                                                                                                                                                                                                                                                                                                                                                                                                                         |
| EPI_ISL_1811231                                                                                                                                   | AS Alajuela Central                                                                                                                                                    | Incienza, Instituto Costarricense de Investigación y Enseñanza en Nutrición y Salud                                                                                                                                                                                                                                                                                       | Pérez-Corrales C                                                                                                                                                                                                                                                                                                                                                                                                                                     |
| EPI_ISL_3308820                                                                                                                                   | AULSS 5 Polesana                                                                                                                                                       | Istituto Zooprofilattico Sperimentale delle Venezie                                                                                                                                                                                                                                                                                                                       | Adelaide Milani; Alessia Schivo; Alice Fusaro; Ambra Pastori; Annalisa Salvato; Antonia Ricci; Calogero Terregino; Edoardo Giussani; Elisa Palumbo; Erika Giorgia Quaranta; Isabella Monne; Luca Tassoni                                                                                                                                                                                                                                             |
| EPI_ISL_3690016                                                                                                                                   | AZ St-Jan Brugge-Oostende                                                                                                                                              | AZ Sint Jan                                                                                                                                                                                                                                                                                                                                                               | Jorn Hellemans; Laurien Hoornaert; Marie Madeleine Chabert-Consen; Marijke Reynders; Patrick Descheemaeker; Thomas Van Landschoot                                                                                                                                                                                                                                                                                                                    |
| EPI_ISL_517616,                                                                                                                                   | Academic Hospital Paramaribo                                                                                                                                           | Erasmus Medical Center                                                                                                                                                                                                                                                                                                                                                    | Bas Oude Munnink; Dion Gajadin; Ed Ijzerman; Emmanuelle Munger; Gary Gummels; Ingrid Krishnadhath; Lycke Woltitz; Marion Koopmans; Mireille Van de Veer; Princes Wongsowidjojo; Radjesh Ori; Rohma Banwari; Stephen Vreden                                                                                                                                                                                                                           |

|                                                                                                                                                                                                                                                                                                                                                                                                                                                                                                                                               |                                                                                                     |                                                                                                                                            |                                                                                                                                                                                                                                                                                                                                                                                                                                                                                                                                                                                                                                                                                                                                                                                                                                                                                                                                             |
|-----------------------------------------------------------------------------------------------------------------------------------------------------------------------------------------------------------------------------------------------------------------------------------------------------------------------------------------------------------------------------------------------------------------------------------------------------------------------------------------------------------------------------------------------|-----------------------------------------------------------------------------------------------------|--------------------------------------------------------------------------------------------------------------------------------------------|---------------------------------------------------------------------------------------------------------------------------------------------------------------------------------------------------------------------------------------------------------------------------------------------------------------------------------------------------------------------------------------------------------------------------------------------------------------------------------------------------------------------------------------------------------------------------------------------------------------------------------------------------------------------------------------------------------------------------------------------------------------------------------------------------------------------------------------------------------------------------------------------------------------------------------------------|
| EPI_ISL_517650,<br>EPI_ISL_518812                                                                                                                                                                                                                                                                                                                                                                                                                                                                                                             |                                                                                                     |                                                                                                                                            |                                                                                                                                                                                                                                                                                                                                                                                                                                                                                                                                                                                                                                                                                                                                                                                                                                                                                                                                             |
| EPI_ISL_1445299, EPI_ISL_2042690, EPI_ISL_2145847, EPI_ISL_2145848, EPI_ISL_2145857, EPI_ISL_2145892, EPI_ISL_2146046, EPI_ISL_2146125, EPI_ISL_2146283, EPI_ISL_2146828, EPI_ISL_2147011, EPI_ISL_2148014, EPI_ISL_2148640, EPI_ISL_2159337, EPI_ISL_2187461, EPI_ISL_2243352, EPI_ISL_2528396, EPI_ISL_2528739, EPI_ISL_2528909, EPI_ISL_2687282, EPI_ISL_2875625, EPI_ISL_2877692, EPI_ISL_3220837, EPI_ISL_3321774, EPI_ISL_3752215, EPI_ISL_3752281, EPI_ISL_3812864, EPI_ISL_3819372, EPI_ISL_3820532, EPI_ISL_3820645, EPI_ISL_3822261 |                                                                                                     |                                                                                                                                            |                                                                                                                                                                                                                                                                                                                                                                                                                                                                                                                                                                                                                                                                                                                                                                                                                                                                                                                                             |
| see above                                                                                                                                                                                                                                                                                                                                                                                                                                                                                                                                     | Aegis Sciences Corporation                                                                          | Centers for Disease Control and Prevention Division of Viral Diseases, Pathogen Discovery                                                  | Adrian Paskey; Alec Vest; Benjamin Rambo-Martin; Christopher Gulvick; Clinton Paden; Clinton R. Paden; Cyndi Clark; Dakota Howard; Darlene Wagner; Dhwanj Batra; Dillon Nali; Duncan MacCannell; Ethan Sanders; Holly Houdeshell; Jason Caravas; Kara Moser; Matthew Hardison; Matthew Schmeer; Ola Kvalvaag; Patrick Campbell; Peter Cook; Rob Case; Scott Sammons; Shatavia Morrison; Shaun Westlund; Vikramsinha Ghorpade; Yvette Unoarumhi                                                                                                                                                                                                                                                                                                                                                                                                                                                                                              |
| EPI_ISL_2360250, EPI_ISL_2360251                                                                                                                                                                                                                                                                                                                                                                                                                                                                                                              | Afzalipoor Hospital                                                                                 | National Influenza Center                                                                                                                  | A Nejadi; F Ajaminejad and T Mokhtari Azad; J Yavarian; K Sadeghi; N Ghavvami; NZ Shafiei Jandaghi; V Salimi                                                                                                                                                                                                                                                                                                                                                                                                                                                                                                                                                                                                                                                                                                                                                                                                                                |
| EPI_ISL_3231382                                                                                                                                                                                                                                                                                                                                                                                                                                                                                                                               | Airport Health Laboratory/Central Health Laboratory                                                 | UMR PIMIT                                                                                                                                  | Bahadoor BS; David Wilkinson; Manraj SS; Patrick Mavingui; Pattoo M; Ramuth M; Sonoo J                                                                                                                                                                                                                                                                                                                                                                                                                                                                                                                                                                                                                                                                                                                                                                                                                                                      |
| EPI_ISL_3217420                                                                                                                                                                                                                                                                                                                                                                                                                                                                                                                               | Airport Health Laboratory/Central Health Laboratory                                                 | Virology Department, Central Health Laboratory ,Victoria Hospital, Candos,Ministry of Health and Wellness, Mauritius                       | Bahadoor BS; Jannoo N; Manraj SS; Mathur H; Pattoo M; Ramuth M; Sonoo J; Sujeewon C                                                                                                                                                                                                                                                                                                                                                                                                                                                                                                                                                                                                                                                                                                                                                                                                                                                         |
| EPI_ISL_1578662, EPI_ISL_2007366, EPI_ISL_2612074, EPI_ISL_3152652, EPI_ISL_3229858                                                                                                                                                                                                                                                                                                                                                                                                                                                           | Akershus University Hospital, Department for Microbiology and Infectious Disease Control            | Norwegian Institute of Public Health, Department of Virology                                                                               | Atiya R Ali; Debec Nadia; Engebretsen Serina Beate; Garcia Llorente Ignacio; Hilde Elshaug; Hilde Vollen; Jon Bråte; Kamilla Heddeland Instefjord; Karoline Bragstad; Kathrine Stene-Johansen; Line Victoria Moen; Marie Paulsen Madsen; Olav Hungnes; Pedersen Benedikte Nevjen; Rasmus Riis Kopperud                                                                                                                                                                                                                                                                                                                                                                                                                                                                                                                                                                                                                                      |
| EPI_ISL_2136787, EPI_ISL_2187670, EPI_ISL_2626716, EPI_ISL_3110600, EPI_ISL_3654155                                                                                                                                                                                                                                                                                                                                                                                                                                                           | Alaska State Virology Laboratory                                                                    | Alaska State Virology Laboratory                                                                                                           | Elva House; Jack Chen; Jacob Zidek; Lisa Smith; Ph.D.; Stephanie DeRonde                                                                                                                                                                                                                                                                                                                                                                                                                                                                                                                                                                                                                                                                                                                                                                                                                                                                    |
| EPI_ISL_1385804                                                                                                                                                                                                                                                                                                                                                                                                                                                                                                                               | Alfa Diagnostica, Republic of Moldova                                                               | ONCOGENE LLC                                                                                                                               | ONCOGENE LLC                                                                                                                                                                                                                                                                                                                                                                                                                                                                                                                                                                                                                                                                                                                                                                                                                                                                                                                                |
| EPI_ISL_3691944                                                                                                                                                                                                                                                                                                                                                                                                                                                                                                                               | Algemeen Medisch Labo                                                                               | Labo Klinische Biologie, UZA                                                                                                               | Basil Britto Xavier; Christine Lammens; Herman Goossens; Ines Verbesselt; Jasmine Coppens; Kathleen Holemans; Marie Le Mercier; Veerle Matheeussen                                                                                                                                                                                                                                                                                                                                                                                                                                                                                                                                                                                                                                                                                                                                                                                          |
| EPI_ISL_2877016, EPI_ISL_3275395, EPI_ISL_3275415, EPI_ISL_3534240, EPI_ISL_3720837                                                                                                                                                                                                                                                                                                                                                                                                                                                           | Allergy, Immunology and Cell Biology Unit (AICBU)                                                   | Allergy, Immunology and Cell Biology Unit (AICBU)                                                                                          | Ayesha Wijesinghe; Chandima Jeewandara; Deshan Madhusanka; Deshni Jayathilaka; Dinuka Ariyaratne; Diyanath Ranasinghe; Dumni Gunasinghe; Gathsaurie Neelika Malavige; Tibutius Thanesh                                                                                                                                                                                                                                                                                                                                                                                                                                                                                                                                                                                                                                                                                                                                                      |
| EPI_ISL_2375992                                                                                                                                                                                                                                                                                                                                                                                                                                                                                                                               | Alma CDC wc AHC                                                                                     | NHLS/UCT                                                                                                                                   | Arash Iranzadeh; Bruna Galvao; Carolyn Williamson; Deelan Doolabh; Diana Hardie; Innocent Mudau; Kruger Marais; Lynn Tyers; Marvin Hsiao; Stephen Korsman                                                                                                                                                                                                                                                                                                                                                                                                                                                                                                                                                                                                                                                                                                                                                                                   |
| EPI_ISL_1324584                                                                                                                                                                                                                                                                                                                                                                                                                                                                                                                               | Anteja laboratorija (UAB Diagnostikos laboratorija)                                                 | Vilnius University Hospital Santaros Klinikos, Center of Laboratory Medicine                                                               | Daniel Naumovas; Dovile Ezerškyte; Gytis Dudas; Ingrida Olendraite; Laimonas Griskevicius; Ligita Raugaite; Mindaugas Stoskus; Monika Katenaite; Rimvydas Norvilas                                                                                                                                                                                                                                                                                                                                                                                                                                                                                                                                                                                                                                                                                                                                                                          |
| EPI_ISL_527747                                                                                                                                                                                                                                                                                                                                                                                                                                                                                                                                | Area De Salud La Cruz                                                                               | Incienza, Instituto Costarricense de Investigación y Enseñanza en Nutrición y Salud                                                        | Adriana Godínez & Melany Calderon; Claudio Soto-Garita; Estela Cordero; Francisco Duarte; Hebleen Porras                                                                                                                                                                                                                                                                                                                                                                                                                                                                                                                                                                                                                                                                                                                                                                                                                                    |
| EPI_ISL_770007                                                                                                                                                                                                                                                                                                                                                                                                                                                                                                                                | Area De Salud San Rafael                                                                            | Incienza, Instituto Costarricense de Investigación y Enseñanza en Nutrición y Salud                                                        | Adriana Godínez; Claudio Soto-Garita; Estela Cordero; Francisco Duarte; Hebleen Porras; Melany Calderón & Mariel López                                                                                                                                                                                                                                                                                                                                                                                                                                                                                                                                                                                                                                                                                                                                                                                                                      |
| EPI_ISL_509499, EPI_ISL_527011                                                                                                                                                                                                                                                                                                                                                                                                                                                                                                                | Area of Virology, Serology and Virology Division (SAVID), New South Wales Health Pathology Randwick | Area of Virology, Serology and Virology Division (SAVID), New South Wales Health Pathology Randwick                                        | Rawlinson, W.                                                                                                                                                                                                                                                                                                                                                                                                                                                                                                                                                                                                                                                                                                                                                                                                                                                                                                                               |
| EPI_ISL_678293, EPI_ISL_678373, EPI_ISL_812347, EPI_ISL_1911191, EPI_ISL_2404987, EPI_ISL_2404988, EPI_ISL_3568299, EPI_ISL_3568459                                                                                                                                                                                                                                                                                                                                                                                                           |                                                                                                     |                                                                                                                                            |                                                                                                                                                                                                                                                                                                                                                                                                                                                                                                                                                                                                                                                                                                                                                                                                                                                                                                                                             |
| see above                                                                                                                                                                                                                                                                                                                                                                                                                                                                                                                                     | Area of Virology, Serology and Virology Division (SAVID), New South Wales Health Pathology Randwick | Virology Research Laboratory; Area of Virology, Serology and Virology Division (SAVID), New South Wales Health Pathology Randwick          | Au, J.; Bull, R.; Deveson, I.; Foster, C.; Rawlinson, W.; Ruiz Silva, M.; Van Hal, S.                                                                                                                                                                                                                                                                                                                                                                                                                                                                                                                                                                                                                                                                                                                                                                                                                                                       |
| EPI_ISL_1113546                                                                                                                                                                                                                                                                                                                                                                                                                                                                                                                               | Arizona Department of Health Services                                                               | TGen North                                                                                                                                 | "Jolene Bowers; Ashlyn Pfeiffer; Chris French; Darrin Lemmer; Dave Engelthaler; Hayley Yaglom; Megan Folkerts; The Arizona COVID Genomics Union (ACGU)"                                                                                                                                                                                                                                                                                                                                                                                                                                                                                                                                                                                                                                                                                                                                                                                     |
| EPI_ISL_2227478                                                                                                                                                                                                                                                                                                                                                                                                                                                                                                                               | Arizona State Public Health Laboratory                                                              | Arizona State Public Health Laboratory                                                                                                     | Jessica Escobar; Katherine Fullerton; Linda Getsinger; Nobuko Fukushima; Stacy White; Trung Huynh; Victor Waddell                                                                                                                                                                                                                                                                                                                                                                                                                                                                                                                                                                                                                                                                                                                                                                                                                           |
| EPI_ISL_3505726                                                                                                                                                                                                                                                                                                                                                                                                                                                                                                                               | Arizona State University                                                                            | Arizona State University                                                                                                                   | Ajeet Bains; Efrem S. Lim; Joshua LaBaer; LaRinda A. Holland; Matthew F. Smith; Nathaniel Johnson; Nicholas J. Mellor; Peter T. Skidmore; Rabia Maqsood; Vel Murugan                                                                                                                                                                                                                                                                                                                                                                                                                                                                                                                                                                                                                                                                                                                                                                        |
| EPI_ISL_2931041                                                                                                                                                                                                                                                                                                                                                                                                                                                                                                                               | Arkansas Children's Hospital                                                                        | Center for Global Health, University of New Mexico Health Sciences Center                                                                  | Amanda Novack; Darrell Dinwiddie; Daryl Dommam; Dirk Haselow; Joshua L. Kennedy; Kurt Schwalm; Valerie Morley                                                                                                                                                                                                                                                                                                                                                                                                                                                                                                                                                                                                                                                                                                                                                                                                                               |
| EPI_ISL_3474080                                                                                                                                                                                                                                                                                                                                                                                                                                                                                                                               | Arkansas Public Health Laboratory, Arkansas Department of Health                                    | University of Minnesota Genomics Center                                                                                                    | Corbin Dirx; Daryl M. Gohl; Jaquelyn Kuriger-Laber; John Garbe                                                                                                                                                                                                                                                                                                                                                                                                                                                                                                                                                                                                                                                                                                                                                                                                                                                                              |
| EPI_ISL_3425318                                                                                                                                                                                                                                                                                                                                                                                                                                                                                                                               | Arlon                                                                                               | Plateforme de testing Namuroise                                                                                                            | Degosserie Jonathan; Demars Aurore; Denis Olivier; Lesly Nyinkeu Kemamen; Maschietto Céline; Mullier François; Nicolas Gilliard; Nobis Chloé; Otto Gaetan                                                                                                                                                                                                                                                                                                                                                                                                                                                                                                                                                                                                                                                                                                                                                                                   |
| EPI_ISL_539811                                                                                                                                                                                                                                                                                                                                                                                                                                                                                                                                | Asiaworld Expo Command Post                                                                         | Hong Kong Department of Health                                                                                                             | Alan K.L. Tsang; Dominic N.C. Tsang; Edman T.K. Lam; Peter C.W. Yip; Rickjason C.W. Chan                                                                                                                                                                                                                                                                                                                                                                                                                                                                                                                                                                                                                                                                                                                                                                                                                                                    |
| EPI_ISL_413490                                                                                                                                                                                                                                                                                                                                                                                                                                                                                                                                | Auckland Hospital                                                                                   | Institute of Environmental Science and Research (ESR)                                                                                      | Erasmus Smit; Gary McAuliffe; Joep de Lig; Lauren Jelly; Matt Storey; Matthew Blakiston; Sally Roberts; Xiaoyun Ren                                                                                                                                                                                                                                                                                                                                                                                                                                                                                                                                                                                                                                                                                                                                                                                                                         |
| EPI_ISL_1008159, EPI_ISL_1117860, EPI_ISL_2232806, EPI_ISL_2232858, EPI_ISL_2427023, EPI_ISL_2427077, EPI_ISL_2427157, EPI_ISL_2757972, EPI_ISL_2758172, EPI_ISL_2887671, EPI_ISL_3546555, EPI_ISL_3797127, EPI_ISL_3797156, EPI_ISL_3797222                                                                                                                                                                                                                                                                                                  |                                                                                                     |                                                                                                                                            |                                                                                                                                                                                                                                                                                                                                                                                                                                                                                                                                                                                                                                                                                                                                                                                                                                                                                                                                             |
| see above                                                                                                                                                                                                                                                                                                                                                                                                                                                                                                                                     | Austrian Agency for Health and Food Safety (AGES)                                                   | Berghaler laboratory, CeMM Research Center for Molecular Medicine of the Austrian Academy of Sciences                                      | Andreas Berghaler; Anna Schedl; Bekir Erguner; Benedikt Agerer; Christoph Bock; Fabian Amman; Jan Laine; Lukas Endler; Maelle Le Moing; Martin Senekowitsch; Matthew Thornton; Michael Schuster; Petr Triska; Thomas Penz                                                                                                                                                                                                                                                                                                                                                                                                                                                                                                                                                                                                                                                                                                                   |
| EPI_ISL_3721613                                                                                                                                                                                                                                                                                                                                                                                                                                                                                                                               | Ayudas Diagnosticas Sura                                                                            | Universidad Nacional de Colombia - Laboratorio Genómico One Health                                                                         | Andres F. Cardona-Rios; Carlos Franco-Muñoz; Carolina Muñoz-Arango; Celeny Ortiz; Daniel O. Maldonado-Perez; Diego A. Álvarez-Díaz; Hector Alejandro Ruiz-Moreno; Idabely Betancur Ortiz; Jorge E. Osorio; Juan P. Hernandez-Ortiz; Karl A Ciuoderis; Katherine Laiton-Donato; Laura Silvana Perez; Lina M. Hurtado; Marcela Mercado-Reyes; Maria Alegria Maya; Maria Stella López; Rita Almanza Payares; Sandra Ines Cano; Simón Villegas Velásquez                                                                                                                                                                                                                                                                                                                                                                                                                                                                                        |
| EPI_ISL_2080337                                                                                                                                                                                                                                                                                                                                                                                                                                                                                                                               | Azienda Sanitaria dell'Alto Adige Laboratorio Aziendale di Microbiologia e Virologia                | Istituto di Genomica Applicata                                                                                                             | Davide Scaglione; Eleonora Paparelli; Elisa Masi; Elisabetta Giacobazzi; Elisabetta Pagani; Gabriele Magris; Irena Jurman; Irene Bianconi; Michele Morgante; Stefanie Wieser; Vera Vendramin                                                                                                                                                                                                                                                                                                                                                                                                                                                                                                                                                                                                                                                                                                                                                |
| EPI_ISL_2710308                                                                                                                                                                                                                                                                                                                                                                                                                                                                                                                               | BARC / Lancet                                                                                       | KRISP, KZN Research Innovation and Sequencing Platform                                                                                     | Giandhari Jennifer; Naidoo Yeshnee; Pillay Sureshnee; San James; Sisonke; Tegally Houriyah; Tshabulia Derek; Wilkinson Eduan; Yajna Ramphal; de Oliveira Tulio                                                                                                                                                                                                                                                                                                                                                                                                                                                                                                                                                                                                                                                                                                                                                                              |
| EPI_ISL_3138931                                                                                                                                                                                                                                                                                                                                                                                                                                                                                                                               | BBTKL PP Banjarbaru                                                                                 | National Institute of Health Research and Development                                                                                      | Arie Ardiansyah Nugraha; Fajar Nur Sulistiyohadi; Hana Aparsi Pawestri; Hartanti Dian Ikawati; Kartika Dewi Puspa; Krisna Pangesti; Nelly Puspandari; Subangkit; Triyani Soekarso; Vivi Setiawaty                                                                                                                                                                                                                                                                                                                                                                                                                                                                                                                                                                                                                                                                                                                                           |
| EPI_ISL_2493764                                                                                                                                                                                                                                                                                                                                                                                                                                                                                                                               | BIOFAST                                                                                             | Instituto Butantan                                                                                                                         | Antonio Jorge Martins; Claudia Renata dos Santos Barros; David Schlesinger; Debora Botequilo Moretti; Dimas Tadeu Covas; Elaine Cristina Marqueze; Elaine Vieira Santos; Evandra Strazza Rodrigues; Heidge Fukumasu; Jayme Augusto de Souza-Neto; José Salvatore Leister Patané; Luiz Alcântara; Luiz Lehmann Coutinho; Maria Carolina Elias; Mauricio Lacerda Nogueira; Rafael dos Santos Bezerra; Raul Machado Neto; Rejane Maria Tommasini Grotto; Ricardo Haddad; Sandra Coccuzzo Sampaio Vessoni; Simone Kashima; Svetoslav Nanev Slavov; Vincent Louis Viola                                                                                                                                                                                                                                                                                                                                                                          |
| EPI_ISL_2983838                                                                                                                                                                                                                                                                                                                                                                                                                                                                                                                               | BIOMNIS EUROFINS IVRY                                                                               | Department of Virology, Henri Mondor University Hospital, Assistance Publique Hôpitaux de Paris, Université Paris-Est Créteil, INSERM U955 | Alexandre Soulier; Christophe Rodriguez; Elisabeth Trawinski; Guillaume Gricourt; Jean-Michel Pawlotsky; Melissa N'Debi; Slim Fourati; Vanessa Demontant                                                                                                                                                                                                                                                                                                                                                                                                                                                                                                                                                                                                                                                                                                                                                                                    |
| EPI_ISL_3130098, EPI_ISL_3130099, EPI_ISL_3130100                                                                                                                                                                                                                                                                                                                                                                                                                                                                                             | BIOMNIS LYON                                                                                        | CNR Virus des Infections Respiratoires - France SUD                                                                                        | Antonin Bal; Bruno Lina; Gregory Destras; Gwendolynne Burfin; Hadrien Regue; Laurence Josset; Martine Valette; Quentin Semanas                                                                                                                                                                                                                                                                                                                                                                                                                                                                                                                                                                                                                                                                                                                                                                                                              |
| EPI_ISL_859610, EPI_ISL_859920, EPI_ISL_860055                                                                                                                                                                                                                                                                                                                                                                                                                                                                                                | BTC, Khalifa University                                                                             | BTC, Khalifa University                                                                                                                    | Al Safar et al                                                                                                                                                                                                                                                                                                                                                                                                                                                                                                                                                                                                                                                                                                                                                                                                                                                                                                                              |
| EPI_ISL_3070926                                                                                                                                                                                                                                                                                                                                                                                                                                                                                                                               | BTCLPP Kelas I Batam                                                                                | Eijkman Institute for Molecular Biology, National Research and Innovation Agency, National Institute of Health Research and Development    | Amin Soebandrio; Edison Johar; Friliasita A Yudhaputri; Hana Aparsi Pawestri; Hidayat Trimarsanto; Iskandar Adnan; Khin Saw Myint; Lidwina Priliani; Lydia V. Panggalo; Muhammad Rezki Rasyak; Safarina G Malik; Subangkit; Sukma Oktavianthi; Vivi Setiawaty; Willy Agustine                                                                                                                                                                                                                                                                                                                                                                                                                                                                                                                                                                                                                                                               |
| EPI_ISL_2859217                                                                                                                                                                                                                                                                                                                                                                                                                                                                                                                               | Baguio General Hospital Medical Center (BGHMC)                                                      | Philippine Genome Center                                                                                                                   | Alethea R. de Guzman; Anna Ong-Lim; Arianne A. Zamora; Benedict A. Maralit; Carlo M. Lapid; Celia Carlos; Devon Ray Pacial; Diomedes A. Carino; Edsel Maurice Salvaña; El King D. Morado; Elcid Aaron R. Pangilinan; Eva Maria Cutiongco-de la Paz; Francis A. Tablizo; Henrietta Marie Rodriguez; Jaime C. Montoya; Jan Michael C. Yap; Jarvin E. Nipales; Jo-Hannah S. Liames; John Q. Wong; Joshua Gregor A. Dizon; Juan Antonio R. Magalana; Karol Sophia Agape R. Padilla; Kenneth M. Kim; Kris P. Punayan; Kristina Patriz Dela Cruz; Lindsay Claire D.L. Carandang; Ma. Exanil Plantig; Marc Edsel C. Ayes; Maria Rosario Singh-Vergeire and Cynthia P. Saloma; Maria Sofia L. Yangzon; Marielle M Gamboa; Marissa Alejandria; Nina Francesca Bustamante; Razel Nikka M. Hao; Renato Jacinto Q. Mantaring; Rianna Patricia S. Cruz; Sheila Mae M. Araiza; Yvonne Valerie Austria; Zipporah Mariebelle R. Enriquez; Zryel V. Mollejon |
| EPI_ISL_3394987                                                                                                                                                                                                                                                                                                                                                                                                                                                                                                                               | Balai Penelitian dan Pengembangan Aceh                                                              | National Institute of Health Research and Development                                                                                      | Arie Ardiansyah Nugraha; Fahmi Ichwansyah; Hana Aparsi Pawestri; Hartanti Dian Ikawati; Kartika Dewi Puspa; Krisna Pangesti; Nelly Puspandari; Subangkit; Triyani Soekarso; Vivi Setiawaty                                                                                                                                                                                                                                                                                                                                                                                                                                                                                                                                                                                                                                                                                                                                                  |
| EPI_ISL_434693                                                                                                                                                                                                                                                                                                                                                                                                                                                                                                                                | Bamrasnaradura hospital                                                                             | National Institute of Health. Department of medical Sciences, Ministry of Public Health, Thailand                                          | Chittaganpitch; Malinee; Okada; Parmmen; Phuygun; Pilailuk; Siripaporn; Sittiporn; Sunthareeya; Thanadachakul; Thanutsapa; Waicharoen; Warawan; Wongboot                                                                                                                                                                                                                                                                                                                                                                                                                                                                                                                                                                                                                                                                                                                                                                                    |
| EPI_ISL_2801892, EPI_ISL_3118366                                                                                                                                                                                                                                                                                                                                                                                                                                                                                                              | Banteay Meanchey Regional Laboratory                                                                | Virology Unit, Institut Pasteur du Cambodge                                                                                                | Cecile Troupin; Chau Darapehak; Chin Savuth; Erik A Karlsson; Jurre Y Siegers; Kraing Sidonn; Leakhena Pum; Ly Sovann; Sophoannadeth Rath; Veasna Duong; Yi Sengdoeurn                                                                                                                                                                                                                                                                                                                                                                                                                                                                                                                                                                                                                                                                                                                                                                      |

|                                                                                                                                                                                                                                                                                |                                                                                                                             |                                                                                                                                            |                                                                                                                                                                                                                                                                                                                                                                                                                                                                                                                                                                    |
|--------------------------------------------------------------------------------------------------------------------------------------------------------------------------------------------------------------------------------------------------------------------------------|-----------------------------------------------------------------------------------------------------------------------------|--------------------------------------------------------------------------------------------------------------------------------------------|--------------------------------------------------------------------------------------------------------------------------------------------------------------------------------------------------------------------------------------------------------------------------------------------------------------------------------------------------------------------------------------------------------------------------------------------------------------------------------------------------------------------------------------------------------------------|
| EPI_ISL_2484708,<br>EPI_ISL_3274242<br>EPI_ISL_509714                                                                                                                                                                                                                          | Baptist Health Medical Center                                                                                               | Center for Global Health, University of New Mexico Health Sciences Center                                                                  | Amanda Novack; Darrell Dinwiddie; Daryl Domman; Dirk Haselow; Joshua L. Kennedy; Kurt Schwalm; Valerie Morley                                                                                                                                                                                                                                                                                                                                                                                                                                                      |
|                                                                                                                                                                                                                                                                                | Belize Ministry of Health                                                                                                   | Pathogen Discovery, Respiratory Viruses Branch, Division of Viral Diseases, Centers for Disease Control and Prevention                     | Anna Uehara; Clinton Paden; Haibin Wang; Jing Zhang; Krista Queen; Suxiang Tong; Yan Li; Ying Tao                                                                                                                                                                                                                                                                                                                                                                                                                                                                  |
| EPI_ISL_2802860                                                                                                                                                                                                                                                                | BioMoLab                                                                                                                    | Microbiologia Molecular, Instituto SELADIS, Universidad Mayor de San Andrés                                                                | Aneth Vasquez Michel; Carmen Delgado Barrera; Oscar M. Rollano-Peñaloza; Sandra Miranda Sardon                                                                                                                                                                                                                                                                                                                                                                                                                                                                     |
| EPI_ISL_2802858,<br>EPI_ISL_2802859,<br>EPI_ISL_2802863                                                                                                                                                                                                                        | BioMoLab                                                                                                                    | Molecular Genetics Laboratory, Instituto de Investigaciones Químicas, Universidad Mayor de San Andrés                                      | Aneth Vasquez Michel; Carmen Delgado Barrera; Oscar M. Rollano-Peñaloza; Sandra Miranda Sardon                                                                                                                                                                                                                                                                                                                                                                                                                                                                     |
| EPI_ISL_1273096                                                                                                                                                                                                                                                                | Biochemistry and Molecular Biology Department-Faculty of Medicine, Al-Quds University                                       | Biochemistry and Molecular Biology Department-Faculty of Medicine, Al-Quds University                                                      | Al-Jawabreh, A.; Al-Jawabreh, H.; Dumaidi, K.; Ereqat, S.; Nasereddin, A.                                                                                                                                                                                                                                                                                                                                                                                                                                                                                          |
| EPI_ISL_924608                                                                                                                                                                                                                                                                 | Bioinformatics and Biostatistics Lab, Advanced Sequencing Facility                                                          | COVID-19 Genomics UK (COG-UK) Consortium                                                                                                   | Aengus Stewart; Chelsea Sawyer; Harshil Patel; Jerome Nicod; Laura Cubitt; Margaret Crawford                                                                                                                                                                                                                                                                                                                                                                                                                                                                       |
| EPI_ISL_730514,<br>EPI_ISL_730551,<br>EPI_ISL_730555,<br>EPI_ISL_878463,<br>EPI_ISL_878571                                                                                                                                                                                     | Biolab Diagnostic Laboratories                                                                                              | Andersen lab at Scripps Research                                                                                                           | Ahmad Tibi; Amid Abdelnour with SEARCH Alliance San Diego; Issa Abu-Dayyeh; Lama Hussein; Lina Mohammad; Zein Naber                                                                                                                                                                                                                                                                                                                                                                                                                                                |
| EPI_ISL_1970834,<br>EPI_ISL_2105674,<br>EPI_ISL_2658760,<br>EPI_ISL_2868422                                                                                                                                                                                                    | Biolab Diagnostic Laboratories                                                                                              | Biolab Diagnostic Laboratories                                                                                                             | Ahmad Tibi; Amid Abdelnour; Badia Saddedin; Eiad Atwa; Issa Abu-Dayyeh; Lama Hussein; Shaima Ali; Shayma Ali                                                                                                                                                                                                                                                                                                                                                                                                                                                       |
| EPI_ISL_3446769                                                                                                                                                                                                                                                                | Biological Hazard and Health Research Laboratory, Centre for Advanced Research in Science (CARS), University of Dhaka       | Genomic Research Lab, BCSIR                                                                                                                | Abu Sayeed Mohammad Mahmud; Barna Goswami; Eshrar Osman; Iffat Jahan; Latiful Bari; Md Abdul Malek; Md Mizanur Rahaman; Md. Ahasan Habib; Md. Kamrul Islam; Md. Murshed Hasan Sarkar; Md. Salim Khan; Md. Shaminur Rahman; Mohammad Mohi Uddin; Mohammad Samir Uzzaman; Shahina Akter; Tanjina Akhter Banu                                                                                                                                                                                                                                                         |
| EPI_ISL_526980                                                                                                                                                                                                                                                                 | Biological prevention, army                                                                                                 | Biological prevention, army                                                                                                                | A.F.; B.E.; Elhosieny; Gad; Harty; M.D.; M.F.; M.G.; Seadawy; Shamel                                                                                                                                                                                                                                                                                                                                                                                                                                                                                               |
| EPI_ISL_1524330,<br>EPI_ISL_2931131,<br>EPI_ISL_2931135,<br>EPI_ISL_2931137,<br>EPI_ISL_2931138                                                                                                                                                                                | Biology Department, College of Science, Al Muthanna University and Public Health Laboratory, Al-Muthanna Health Directorate | Department of Virology, Faculty of Medicine, University of Helsinki, Helsinki, Finland                                                     | Alaa Hameed; Ali Jasim; Batool Kadham Salman; Hussein Alburkat; Hussein Riadh Kitab; Murad Munahi; Nihad Al-Rashedi; Olli Vapalahti; Tarja Sironen; Teemu Smura                                                                                                                                                                                                                                                                                                                                                                                                    |
| EPI_ISL_1420639                                                                                                                                                                                                                                                                | Biomedical Research Foundation of the Academy of Athens (BRFAA)                                                             | Greek Genome Center, Biomedical Research Foundation of the Academy of Athens (BRFAA)                                                       | Dimitrios Thanos; Emmanouil Athanasiadis; Ioannis Vatsellas; Katerina Zoi; Theodoros Loupis                                                                                                                                                                                                                                                                                                                                                                                                                                                                        |
| EPI_ISL_3145270,<br>EPI_ISL_3145921                                                                                                                                                                                                                                            | BioneXt Lab                                                                                                                 | Laboratoire national de sante, Microbiology, Microbial Genomics Platform                                                                   | Anke Wienecke-Baldacchino; Catherine Ragimbeau; Elodie Solarino; Fatu Djabi; Jessica Tapp; Lise Pignon; Raoul Salmon; Tamir Abdelrahman; Thibault Ferrandon; Virginie Jover                                                                                                                                                                                                                                                                                                                                                                                        |
| EPI_ISL_2464487,<br>EPI_ISL_2983948,<br>EPI_ISL_3390947                                                                                                                                                                                                                        | Biopole Antilles                                                                                                            | Department of Virology, Henri Mondor University Hospital, Assistance Publique Hôpitaux de Paris, Université Paris-Est Créteil, INSERM U955 | Alexandre Soulier; Christophe Rodriguez; Elisabeth Trawinski; Guillaume Gricourt; Jean-Michel Pawlotsky; Melissa N'Debi; Slim Fourati; Vanessa Demontant                                                                                                                                                                                                                                                                                                                                                                                                           |
| EPI_ISL_985069,<br>EPI_ISL_985129                                                                                                                                                                                                                                              | Biorepository and Clinical Virology Laboratory                                                                              | Ozer Lab                                                                                                                                   | Adeola A. Fowotade; Babafemi O. Taiwo; Egon A. Ozer; Ewan C. Omoruyi; Johnson A. Adeniji; Judd F. Hultquist; Lacy M. Simons; Olubusuyi M. Adewumi; Ramon Lorenzo-Redondo                                                                                                                                                                                                                                                                                                                                                                                           |
| EPI_ISL_3712206                                                                                                                                                                                                                                                                | Bioscientia Labor Wermsdorf                                                                                                 | Robert Koch Institute                                                                                                                      |                                                                                                                                                                                                                                                                                                                                                                                                                                                                                                                                                                    |
| EPI_ISL_1363123,<br>EPI_ISL_2535741                                                                                                                                                                                                                                            | Borneo Medical Centre                                                                                                       | Institute of Health and Community Medicine                                                                                                 | Chan Chia Juli; Chua Hock Hin; David Perera; Ooi Mong How; Tonni Sia Loong Loong; Wong Jyn Shan; Wong Kiing Aik                                                                                                                                                                                                                                                                                                                                                                                                                                                    |
| EPI_ISL_1516860, EPI_ISL_2372273, EPI_ISL_2372301, EPI_ISL_2386154, EPI_ISL_2504068, EPI_ISL_2820447, EPI_ISL_2868344, EPI_ISL_2868350, EPI_ISL_2868357, EPI_ISL_2931811, EPI_ISL_2931830, EPI_ISL_3453911, EPI_ISL_3453913, EPI_ISL_3453914, EPI_ISL_3453916, EPI_ISL_3453917 | Botswana Harvard HIV Reference Laboratory                                                                                   | Botswana Harvard HIV Reference Laboratory                                                                                                  | Boitumelo J.L. Zuze; Boitumelo Zuze; Botshelo Radibe; David Lawrence; Dorcas Maruapula; Irvin Kgetse; Joseph Makhema; Kelebeleitse K. Mokobela; Keoratile Ntshambiwa; Kgomotso Moruisi; Legodile Kooepile; Lindani Bochena; Madisa Mine; Modisa Motswaledi; Mosepele Mosepele; Ontlametse T. Bareng; Pamela Lawrence-Smith; Pamela Smith-Lawrence; Roger Shapiro; Shahin Lockman; Sikhulile Dorcas Maruapula; Sikhulile Moyo; Simani Gaseitsiwe; Thongbotho Mphoyakgosi; Wonderful T. Choga                                                                        |
| see above                                                                                                                                                                                                                                                                      | Botswana Harvard HIV Reference Laboratory                                                                                   | Botswana Harvard HIV Reference Laboratory                                                                                                  | Aidan McVey; Anna Nemudraia; Artem Nemudryi; Blake Wiedenheft; Calvin Cicha; Deann T. Snyder; Diane Bimczok; Helen Lee; Jodi F. Hedges; Joseph Nichols; Karl K. Vanderwood; Mark A. Jutla and Blake Wiedenheft; Tanner Wiegand                                                                                                                                                                                                                                                                                                                                     |
| EPI_ISL_903343,<br>EPI_ISL_3669072                                                                                                                                                                                                                                             | Bozeman Health Deaconess Hospital                                                                                           | Wiedenheft lab, Montana State University                                                                                                   |                                                                                                                                                                                                                                                                                                                                                                                                                                                                                                                                                                    |
| EPI_ISL_3482341,<br>EPI_ISL_3484393,<br>EPI_ISL_3489914,<br>EPI_ISL_3602680                                                                                                                                                                                                    | British Columbia Centre For Disease Control                                                                                 | BCCDC Public Health Laboratory                                                                                                             | Ana Pacagnella; Corrinne Ng; Dan Fornika; John Tyson; Kim Macdonald; Kimia Kamelian; Linda Hoang; Loretta Janz; Mel Krajdien; Prystajacky Natalie; Robert Azana; Shannon Russell                                                                                                                                                                                                                                                                                                                                                                                   |
| EPI_ISL_2991947                                                                                                                                                                                                                                                                | Broad Institute Clinical Research Sequencing Platform                                                                       | Infectious Disease Program, Broad Institute of Harvard and MIT                                                                             | A.E.; Adams, G.; Anahtar, M.; B.L.; B.W.; Bauer, M.; Birren; Branda, J.; Carter, A.; Cerrato, F.; Chaluvasi, S.; Chapman; Cusick, C.; D.J.; DeRuff, K.; Flowers, K.; Gallagher, G.; Gladden-Young, A.; Gnrirk, A.; Harris, J.; J.E.; K.J.; LaRocque, R.; Lagerborg, K.; Lemieux; Lin; Loreth, C.; MacInnis; Neumann, A.; Normandin, E.; P.C.; Park; Pierce, V.; Reilly, S.; Rosenberg, E.; Rudy, M.; Ryan, E.; S.B.; Sabeti; Shaw, B.; Siddle; Slater, D.; Smole, S.; Tomkins-Tinch, C.; Turbett, S.                                                               |
| see above                                                                                                                                                                                                                                                                      | Broad Institute Clinical Research Sequencing Platform                                                                       | Infectious Disease Program, Broad Institute of Harvard and MIT                                                                             | Adams, G.; B. L.; B.W.; Bauer, M.; Birren; Blumenstiel, B.; Brown, C.; Carter, A.; Chaluvasi, S.; D.J.; DeFelice, M.; DeRuff, K.; Dodge, S.; Gabriel, S.; Gallagher, G.; Gladden-Young, A.; Granger, B.; J.E.; K.J.; Lagerborg, K.; Larkin, K.; Lee, M.; Lemieux; Lennon, N.; Loreth, C.; Madoff, L.; McGovern, S.; Meldrim, J.; Normandin, E.; P.C.; Park; Pearlman, L.; Reilly, S.; Rudy, M.; Sabeti; Siddle; Smole, S.; Tomkins-Tinch, C.; Vicente, G.; and MacInnis                                                                                            |
| EPI_ISL_1000998,<br>EPI_ISL_1034755,<br>EPI_ISL_1034756                                                                                                                                                                                                                        | Bundeswehr Institute of Microbiology                                                                                        | Bundeswehr Institute of Microbiology                                                                                                       | Alexandra Rehn; Enrico Georgi; Malena Bestehorn-Willmann; Markus Antwerpen; Mathias Walter; Mike Pillukat; Roman Wölfe; Sabine Zange                                                                                                                                                                                                                                                                                                                                                                                                                               |
| EPI_ISL_1371897,<br>EPI_ISL_1371900                                                                                                                                                                                                                                            | C H DE LA POLYNESIE FRANCAISE                                                                                               | CNR Virus des Infections Respiratoires - France SUD                                                                                        | Antonin Bal; Bruno Lina; Gregory Destras; Gwendolyne Burfin; Hadrien Regue; Laurence Josset; Martine Valette; Quentin Semanas                                                                                                                                                                                                                                                                                                                                                                                                                                      |
| EPI_ISL_2170818                                                                                                                                                                                                                                                                | CAP TORELLO                                                                                                                 | Banc de Sang i Teixits                                                                                                                     | Carlos Hobeich; Francisco Vidal; Irene Corrales; Lorena Ramírez; Maria Glòria Soria; Natàlia Comes; Nina Borràs; Noemí Gonzalez; Silvia Sauleda                                                                                                                                                                                                                                                                                                                                                                                                                    |
| EPI_ISL_3121375,<br>EPI_ISL_3500566                                                                                                                                                                                                                                            | CENTOGENE Frankfurt Laboratory: Niederlassung Industriepark Höchst                                                          | Robert Koch Institute                                                                                                                      |                                                                                                                                                                                                                                                                                                                                                                                                                                                                                                                                                                    |
| EPI_ISL_3696694,<br>EPI_ISL_3696714,<br>EPI_ISL_3696757                                                                                                                                                                                                                        | CENTRO DE ENFRENTAMIENTO COVID                                                                                              | Instituto Butantan                                                                                                                         | Antonio Jorge Martins; Claudia Renata dos Santos Barros; David Schlesinger; Debora Botequilo Moretti; Dimas Tadeu Covas; Elaine Cristina Marqueze; Elaine Vieira Santos; Evandra Strazza Rodrigues; Heidge Fukumasu; Jayme Augusto de Souza-Neto; José Salvatore Leister Patané; Luiz Alcantara; Luiz Lehmann Coutinho; Maria Carolina Elias; Mauricio Lacerda Nogueira; Rafael dos Santos Bezerra; Raul Machado Neto; Rejane Maria Tommasini Grotto; Ricardo Haddad; Sandra Coccuzzo Sampaio Vessoni; Simone Kashima; Svetoslav Nanev Slavov; Vincent Louis Viala |
| EPI_ISL_3385844                                                                                                                                                                                                                                                                | CENTRO DE GENETICA Y BIOLOGIA MOLECULAR UNIVERSIDAD DEL MAGDALENA                                                           | Instituto Nacional de Salud- Dirección de Investigación en Salud Pública                                                                   | Carlos Franco-Muñoz; Carmen Osorio; Diana Malo; Diego A. Álvarez-Díaz; Diego Andrés Prada; Gerardo Santamaría; Hector Alejandro Ruiz-Moreno; Jhonattan Reales-González; Jorge Rivera; Juan Camilo Martínez; Julian Naizaque; Katherine Laiton-Donato; Lisseth Pardo; Magdalena Wiesner; Marcela Mercado-Reyes; Maria T. Herrera-Sepúlveda; Marta Lopez Blanco; Martha Lucia Ospina Martínez; Paola Rojas; Sergio Gomez; Sheryll Corchuelo; Ángela Alarcon Cruz                                                                                                     |
| EPI_ISL_644261                                                                                                                                                                                                                                                                 | CEPHR / Vincent's Hospital                                                                                                  | Irish Coronavirus Sequencing Consortium - National Virus Reference Laboratory                                                              | Alejandro Abner Garcia Leon; Gabriel Gonzalez; Michael Carr; Patrick Mallon                                                                                                                                                                                                                                                                                                                                                                                                                                                                                        |
| EPI_ISL_3071597<br>EPI_ISL_3798660                                                                                                                                                                                                                                             | CH Porto - H Sto Antonio<br>CH Tondela Viseu                                                                                | Instituto Nacional de Saude (INSA)<br>Instituto Nacional de Saude (INSA)                                                                   | Borges et al<br>Borges et al                                                                                                                                                                                                                                                                                                                                                                                                                                                                                                                                       |
| EPI_ISL_3758176                                                                                                                                                                                                                                                                | CHECK-UP - Medicina e Diagnóstico - Matriz                                                                                  | HLAGYN - Laboratorio de Imunologia de Transplantes de Goiás                                                                                | Elaize Maria Gomes de Paula; Fernando Antonio Vinhal dos Santos; Frederico Rodrigues Vinhal; Gladstone Rodrigues da Cunha Filho; Kamila Oliveira Reis De Freitas; Lucas Carlos Gomes Pereira; Nubia Silva Araújo; Sabrina Sara Moreira Duarte                                                                                                                                                                                                                                                                                                                      |
| EPI_ISL_1398980                                                                                                                                                                                                                                                                | CHMT                                                                                                                        | Instituto Nacional de Saude (INSA) and BioSystems & Integrative Sciences Institute (BioSI) Genomics Unit, FCUL                             | Borges et al                                                                                                                                                                                                                                                                                                                                                                                                                                                                                                                                                       |
| EPI_ISL_3432134<br>EPI_ISL_482886                                                                                                                                                                                                                                              | CHTMAD<br>CHU Purpan - Laboratoire de Virologie - Institut Fédératif de Biologie                                            | Instituto Nacional de Saude (INSA)<br>Laboratoire de virologie - École Nationale Vétérinaire de Toulouse                                   | Borges et al<br>Guillaume Creville; Jacques Izopet; Jean-Luc Guérin                                                                                                                                                                                                                                                                                                                                                                                                                                                                                                |
| EPI_ISL_2445741<br>EPI_ISL_2441796                                                                                                                                                                                                                                             | CHU Sao Joao, Porto<br>CHU de la Réunion - Nord                                                                             | Instituto Nacional de Saude (INSA)<br>Laboratoire de virologie, CNR arbovirus Associé, Chu de la Réunion                                   | Borges et al<br>Etienne Frumence; Marie-Christine Jaffar Bandjee; Nicolas Traversier; Sabrina Petit Genet                                                                                                                                                                                                                                                                                                                                                                                                                                                          |
| EPI_ISL_683835                                                                                                                                                                                                                                                                 | CICM                                                                                                                        | Malaria Research and Training Center (MRTC-Parasito)                                                                                       | Abdoulaye Djimde; Antoine Dara                                                                                                                                                                                                                                                                                                                                                                                                                                                                                                                                     |
| EPI_ISL_2683873<br>EPI_ISL_2657868                                                                                                                                                                                                                                             | CICM, Bamako<br>COVID 19- EPS FAMISANAR                                                                                     | Malaria Research and Training Center-Bamako<br>Instituto Nacional de Salud- Dirección de                                                   | Abdoul Karim Sangare; Abdoulaye Djimde; Amadou Daou; Antoine Dara; Bourema Kouriba<br>Carlos Franco-Muñoz; Carmen Osorio; Diana Malo; Diego A. Álvarez-Díaz; Diego Andrés Prada; Gerardo Santamaría; Hector Alejandro Ruiz-Moreno; Jhonattan Reales-González; Jorge Rivera; Juan Camilo Martínez; Julian Naizaque; Katherine Laiton-Donato; Lisseth Pardo; Magdalena                                                                                                                                                                                               |

|                                                                                                                                                                                                                                                                                                                                                                                                                                                                                                                                                               |                                                                                          |                                                                                                                      |                                                                                                                                                                                                                                                                                                                                                                                                                                                                                                                                                                                                                                                                                                                                                                                                                                                                                                                  |  |
|---------------------------------------------------------------------------------------------------------------------------------------------------------------------------------------------------------------------------------------------------------------------------------------------------------------------------------------------------------------------------------------------------------------------------------------------------------------------------------------------------------------------------------------------------------------|------------------------------------------------------------------------------------------|----------------------------------------------------------------------------------------------------------------------|------------------------------------------------------------------------------------------------------------------------------------------------------------------------------------------------------------------------------------------------------------------------------------------------------------------------------------------------------------------------------------------------------------------------------------------------------------------------------------------------------------------------------------------------------------------------------------------------------------------------------------------------------------------------------------------------------------------------------------------------------------------------------------------------------------------------------------------------------------------------------------------------------------------|--|
|                                                                                                                                                                                                                                                                                                                                                                                                                                                                                                                                                               |                                                                                          | Investigación en Salud Pública                                                                                       | Wiesner; Marcela Mercado-Reyes; Maria T. Herrera-Sepúlveda; Marta Lopez Blanco; Martha Lucia Ospina Martinez; Paola Rojas; Sergio Gomez; Sheryll Corchuelo; Ángela Alarcon Cruz                                                                                                                                                                                                                                                                                                                                                                                                                                                                                                                                                                                                                                                                                                                                  |  |
| EPI_ISL_3600721                                                                                                                                                                                                                                                                                                                                                                                                                                                                                                                                               | CPHL, MOH, EGYPT                                                                         | CPHL, MOH, EGYPT                                                                                                     | Abd Monaem Adel; Amelia naguib; Dalia Ramadan; Galal Mahmoud; Mohamed A Ali; Mohamed Hassany; Mohamed K. Khalifa; Nancy el guindy; Rabeh .R. El/Shesheny; Ramy Galal; Shymaa s. Ahmed; Wael H. Roshdy; salma sayed                                                                                                                                                                                                                                                                                                                                                                                                                                                                                                                                                                                                                                                                                               |  |
| EPI_ISL_3274151, EPI_ISL_3274155, EPI_ISL_3274156, EPI_ISL_3274159                                                                                                                                                                                                                                                                                                                                                                                                                                                                                            | CPHL/MOH/EGYPT                                                                           | CPHL/MOH/EGYPT                                                                                                       | Wael H. Roshdy/ Mohamed Kamal / Shymaa s. Ahmed/ Ramy Galal/Nancy el guindy/ Amel naguib/salma sayed/ Abd Monaem Adel/Galal Mahmoud/Dalia Ramadan/Rabeh .R. El/Shesheny/ Mohamed A Ali/Mohamed Hassany; Wael H. Roshdy/ Mohamed Kamal / Shymaa s. Ahmed/ Ramy Galal/Nancy el guindy/ Amelia naguib/salma sayed/ Abd Monaem Adel/Galal Mahmoud/Dalia Ramadan/Rabeh .R. El/Shesheny/ Mohamed A Ali/Mohamed Hassany                                                                                                                                                                                                                                                                                                                                                                                                                                                                                                 |  |
| EPI_ISL_447859, EPI_ISL_910156, EPI_ISL_910290                                                                                                                                                                                                                                                                                                                                                                                                                                                                                                                | CSIR-Centre for Cellular and Molecular Biology                                           | CSIR-Centre for Cellular and Molecular Biology                                                                       | Archana Bharadwaj Siva; B Himasri; Blessy B John; Dhiviya Vedagiri; Divya Gupta; Divya Tej Sowpati; Karthik Bharadwaj Tallapakka; Krishnan Harinivas Harshan; Lamuk Zaveri; Namami Gaur; Payel Mukherjee; Pratheesa Maccha; Priya Singh; Purushotham Vodnala; Rakesh K Mishra; Sakshi Shambhavi; Santosh Kumar Kuncha; Shagufta Khan; Sofia Banu; Tulasi Nagabandi; Vishal Sah; Viswagithe S L                                                                                                                                                                                                                                                                                                                                                                                                                                                                                                                   |  |
| EPI_ISL_2441676                                                                                                                                                                                                                                                                                                                                                                                                                                                                                                                                               | CSIR-Centre for Cellular and Molecular Biology                                           | CSIR-Centre for Cellular and Molecular Biology-INSACOG                                                               | ; Amareshwar Vodapalli; Aara Sreenivas; Archana Bharadwaj Siva; B Himasri; Divya Tej Sowpati; Karthik Bharadwaj Tallapakka; Lamuk Zaveri; Onkar Kulkarni; Payel Mukherjee; Priya Nurkurthy; Rakesh K Mishra; Shreekanth Verma; Sofia Banu; Sumedha Avadhanula; Tulasi Nagabandi; Valli Nagalakshmi Undamatla; Vidhyadhari Methuku                                                                                                                                                                                                                                                                                                                                                                                                                                                                                                                                                                                |  |
| EPI_ISL_3060676                                                                                                                                                                                                                                                                                                                                                                                                                                                                                                                                               | CSIR-National Environmental Engineering Research Institute                               | CSIR-Centre for Cellular and Molecular Biology-INSACOG                                                               | Amareshwar Vodapalli; Aara Sreenivas; Archana Bharadwaj Siva; B Himasri; Divya Tej Sowpati; Karthik Bharadwaj Tallapakka; Krishna Khairnar; Lamuk Zaveri; Onkar Kulkarni; Payel Mukherjee; Priya Nurkurthy; Rakesh K Mishra; Shreekanth Verma; Sofia Banu; Sumedha Avadhanula; Tulasi Nagabandi; Valli Nagalakshmi Undamatla; Vidhyadhari Methuku                                                                                                                                                                                                                                                                                                                                                                                                                                                                                                                                                                |  |
| EPI_ISL_3320697                                                                                                                                                                                                                                                                                                                                                                                                                                                                                                                                               | CT Department of Public Health                                                           | CT Department of Public Health                                                                                       | Claire_Pearson; Tu_N_Nguyen                                                                                                                                                                                                                                                                                                                                                                                                                                                                                                                                                                                                                                                                                                                                                                                                                                                                                      |  |
| EPI_ISL_2757857                                                                                                                                                                                                                                                                                                                                                                                                                                                                                                                                               | CURE                                                                                     | Institut Pasteur de Montevideo                                                                                       | Andres Lizarosain; Belén González; Cecilia Alonso; Daiana Mir; Emiliano Pereira; Gonzalo Bello; Ighor Arantes; Juan Zanetti; Lucia Bilbao; Luciana Grifero; Lucia Spangenberg; Mailen Arleo; Mariana Brandes; María José Benítez-Galeano; Matías Castells; Matías Salvo; Matías Victoria; Mauricio Méndez; Melissa Duquía; Natalia Reyes; Odhille Chappos; Pablo Smircich; Pia Techera; Rodney Colina; Tamara Fernández-Calero; Tania Possi; Verónica Noya                                                                                                                                                                                                                                                                                                                                                                                                                                                       |  |
| EPI_ISL_582255, EPI_ISL_582311, EPI_ISL_582484                                                                                                                                                                                                                                                                                                                                                                                                                                                                                                                | Cadham Provincial Laboratory                                                             | National Microbiology Laboratory (NML)                                                                               | Anna Majer; Anneliese Landgraaf; CanCOGeN's metadata curation team; Darian Hole; David Alexander; Elsie Grudeski; Gary Van Domselaar; Grace Seo; Jared Bullard; Jennifer Tanner; Kerry Dust; Madison Chapel; Morag Graham; Natalie Knox; Nathalie Bastien; Paul Van Caesele; Philip Mabon; Public Health Agency of Canada CanCOGeN team; Rhiannon Huzarewicz; Russell Mandes; Shari Tyson; Timothy Booth; Yan Li                                                                                                                                                                                                                                                                                                                                                                                                                                                                                                 |  |
| EPI_ISL_2859201                                                                                                                                                                                                                                                                                                                                                                                                                                                                                                                                               | Cagayan Valley Medical Center Molecular Laboratory                                       | Philippine Genome Center                                                                                             | Alethea R. de Guzman; Anna Ong-Lim; Arianne A. Zamora; Benedict A. Maralit; Carlo M. Lapid; Celia Carlos; Devon Ray Pacial; Diomedes A. Carino; Edsel Maurice Salvaña; El King D. Morado; Elcid Aaron R. Pangilinan; Eva Maria Cutiongco-de la Paz; Francis A. Tablizo; Henrietta Marie Rodriguez; Jaime C. Montoya; Jan Michael C. Yap; Jarvin E. Nipales; Jo-Hannah S. Liames; John O. Mauricio; Joshua Gregor A. Dizon; Juan Antonio R. Nagalagan; Karol Sophia Agustin R. Pacial; Kristina Patriz Dela Cruz; Lindsay Claire D.L. Carandang; Ma. Exanil Plantig; Marc Edsel C. Ayas; Maria Rosario Singh-Vergeire and Cynthia P. Saloma; Maria Sofia L. Yangzon; Marielle M Gamboa; Marissa Alejandra; Nina Francesca Bustamante; Razel Nikka M. Hao; Renato Jacinto Q. Mantaring; Rianna Patricia S. Cruz; Sheila Mae M. Araiza; Yvonne Valerie Austria; Zipporah Mariebelle R. Enriquez; Zyrrel V. Mollejon |  |
| EPI_ISL_907087                                                                                                                                                                                                                                                                                                                                                                                                                                                                                                                                                | Cancer Biology Department, National Cancer Institute                                     | Cancer Biology Department, National Cancer Institute                                                                 | A.A.; A.E.; A.N.; Abouelhoda, M.; Ahmed; Bahnassy; Elhosieny; F.W.; Gad, H.K.; Hafez; Hamdy; M.G.; M.M.; M.S.; O.S.; Sedawy; Soliman; Soliman, L.; Zekri                                                                                                                                                                                                                                                                                                                                                                                                                                                                                                                                                                                                                                                                                                                                                         |  |
| EPI_ISL_2652216, EPI_ISL_3021346                                                                                                                                                                                                                                                                                                                                                                                                                                                                                                                              | Cantacuzino National Military-Medical Institute, Viral Respiratory Infections Laboratory | Cantacuzino Institute Virology                                                                                       | Carmen Cherciu; Luiza Ustea; Mihaela Lazar; Mihaela Oprea; Nicoleta Paraschiv; Sorin Dinu                                                                                                                                                                                                                                                                                                                                                                                                                                                                                                                                                                                                                                                                                                                                                                                                                        |  |
| EPI_ISL_548117, EPI_ISL_548138, EPI_ISL_579066, EPI_ISL_579067, EPI_ISL_579077, EPI_ISL_579087, EPI_ISL_579092, EPI_ISL_579221, EPI_ISL_579426, EPI_ISL_579452, EPI_ISL_579496, EPI_ISL_622782, EPI_ISL_622795, EPI_ISL_622799, EPI_ISL_622827, EPI_ISL_682285, EPI_ISL_755622, EPI_ISL_843200, EPI_ISL_1082255, EPI_ISL_1904855, EPI_ISL_1967890, EPI_ISL_2406488, EPI_ISL_2811947, EPI_ISL_2811950, EPI_ISL_2811951, EPI_ISL_2811952, EPI_ISL_2811953, EPI_ISL_2811958, EPI_ISL_3477088, EPI_ISL_3477089, EPI_ISL_3543460, EPI_ISL_3709213, EPI_ISL_3760091 | see above                                                                                | Canterbury Health Laboratories                                                                                       | Anja Werno; Antje van der Linden; Arlo Upton; Chris Mansell; David Hammer; Dragana Drinkovic; Erasmus Smit; Gary McAuliffe; Hana Sofia Andersson; Hermes Perez; James Ussher; Jill Sherwood; Jing Wang; Joep de Ligt; Josh Freeman; Julia Howard; Juliet Elvy; Lauren Jelly; Mary DeAlmeida; Matt Blakiston; Matt Storey; Matthew Rogers; Max Bloomfield; Michael Addidle; Michelle Balm; Muhammad Faisal; Nikki Freed; Olin Silander; Olivia Stroeven; Paula scholes; Rachel Boyle; Sally Roberts; SallyAnn Harbison; Sarah Jefferies; Sharmini Muttaiyah; Susan Lin; Susan Morpeth; Susan Taylor; Timothy Blackmore; Vani Sathyendran; Veronica Playle; Virginia Hope; Xiaoyun Ren                                                                                                                                                                                                                             |  |
| EPI_ISL_1588904, EPI_ISL_1591265, EPI_ISL_2225271                                                                                                                                                                                                                                                                                                                                                                                                                                                                                                             | Caribbean Public Health Agency                                                           | Carrington Lab, Department of PreClinical Sciences, Faculty of Medical Sciences, The University of the West Indies   | Adesh Ramsubhag; Arianne Brown-Jordan; Avery Hinds; Chinna Chinnadura; Christine V. F. Carrington; Christopher Oura; Gabriel Escobar; Jaya Jayaraman; Jerome Foster; Karla Georges; Marsha Ivey; Naresh Nandram; Narine Singh; Nikita S. D. Shahdeo; Nuno Faria; Oliver Pybus; Rahul Naidu; Rajini Haraksingh; Risha Singh; Roshan Parasram; Sarah Hill; Stanley Giddings; SueMin Nathaniel; Vernie Ramkissoon                                                                                                                                                                                                                                                                                                                                                                                                                                                                                                   |  |
| EPI_ISL_2835622, EPI_ISL_2835635, EPI_ISL_2835640                                                                                                                                                                                                                                                                                                                                                                                                                                                                                                             | Center for Medical and Sanitary Research (CERMES)                                        | CDC Atlanta                                                                                                          | Adamou Lagare; Dhvani Batra; Justin Lee                                                                                                                                                                                                                                                                                                                                                                                                                                                                                                                                                                                                                                                                                                                                                                                                                                                                          |  |
| EPI_ISL_3505577, EPI_ISL_3505594, EPI_ISL_3505619, EPI_ISL_3505621                                                                                                                                                                                                                                                                                                                                                                                                                                                                                            | Center for Research on Health in Latin America                                           | Institute of Microbiology, Universidad San Francisco de Quito                                                        | Belén Prado-Vivar; Bernardo Gutiérrez; Erika Muñoz; Fernanda Zurita; Gabriel Trueba; Jaime Costales; Juan José Guadalupe; Michelle Grunauer; Monica Becerra-Wong; Patricio Rojas-Silva; Paúl Cárdenas; Sully Márquez; Verónica Barragán                                                                                                                                                                                                                                                                                                                                                                                                                                                                                                                                                                                                                                                                          |  |
| EPI_ISL_853886                                                                                                                                                                                                                                                                                                                                                                                                                                                                                                                                                | Center for Virology, Medical University of Vienna                                        | Berghthaler laboratory, CeMM Research Center for Molecular Medicine of the Austrian Academy of Sciences              | Alexander Lercher; Alexandra Popa; Andreas Berghthaler; Anna Schedl; Benedikt Agerer; Christoph Bock; Jakob-Wendelin Genger; Jan Laine; Lukas Endlier; Martin Senekowitsch; Michael Schuster; Thomas Penz                                                                                                                                                                                                                                                                                                                                                                                                                                                                                                                                                                                                                                                                                                        |  |
| EPI_ISL_2232291, EPI_ISL_2232305, EPI_ISL_2232307, EPI_ISL_2380063, EPI_ISL_2380087, EPI_ISL_2380094                                                                                                                                                                                                                                                                                                                                                                                                                                                          | Center of Scientific Excellence for Influenza Viruses (CSEIV), National Research Centre  | Center of Scientific Excellence for Influenza Viruses (CSEIV), National Research Centre                              | Ahmed E Kayed; Ahmed El-Taweel; Ahmed Kandeil; Ahmed Mostafa; Ghazi Kayali; Mahmoud Shehata; Mina Kamel; Mohamed Ahmed Ali; Mohamed El Sayes; Mokhtar Gomaa; Noura M Abo Shama; Omnia Kutkat; Rabeh El-Shesheny; Richard Webby; Sara Mahmoud; Yassin Moatasim                                                                                                                                                                                                                                                                                                                                                                                                                                                                                                                                                                                                                                                    |  |
| EPI_ISL_539495                                                                                                                                                                                                                                                                                                                                                                                                                                                                                                                                                | Centers for Disease Control and Prevention, Dengue Branch                                | Centers for Disease Control and Prevention, Dengue Branch                                                            | Betzabel Flores; Diego Sainz de la Peña; Gabriela Paz-Bailey; Gilberto A. Santiago; Glenda Gonzalez; Janice Perez; Jorge Bertran; Jorge L. Munoz-Jordan; Keyla Charriez; Vanessa Rivera-Amill                                                                                                                                                                                                                                                                                                                                                                                                                                                                                                                                                                                                                                                                                                                    |  |
| EPI_ISL_406031, EPI_ISL_3000790, EPI_ISL_3040149                                                                                                                                                                                                                                                                                                                                                                                                                                                                                                              | Centers for Disease Control, R.O.C. (Taiwan)                                             | Centers for Disease Control, R.O.C. (Taiwan)                                                                         | Ji-Rong Yang; Jung-Jung Mu; Ming-Tsan Liu; Ming-Tsan-Liu; Shu-Ying Li; Yu-Chi Lin; Yu-Chi-Lin                                                                                                                                                                                                                                                                                                                                                                                                                                                                                                                                                                                                                                                                                                                                                                                                                    |  |
| EPI_ISL_815390                                                                                                                                                                                                                                                                                                                                                                                                                                                                                                                                                | Centogene                                                                                | Centogene                                                                                                            | Krishna Kumar Kandaswamy; Peter Bauer; Vivi Hue-Trang Lieu                                                                                                                                                                                                                                                                                                                                                                                                                                                                                                                                                                                                                                                                                                                                                                                                                                                       |  |
| EPI_ISL_2612529                                                                                                                                                                                                                                                                                                                                                                                                                                                                                                                                               | Centracare Laboratory Services                                                           | Minnesota Department of Health, Public Health Laboratory                                                             | Alexandra Lorentz; Jacob Garfin; Matt Plumb; and Xiong Wang                                                                                                                                                                                                                                                                                                                                                                                                                                                                                                                                                                                                                                                                                                                                                                                                                                                      |  |
| EPI_ISL_2834912, EPI_ISL_2834921                                                                                                                                                                                                                                                                                                                                                                                                                                                                                                                              | Central Health Laboratory                                                                | Central Health Laboratory ,Victoria Hospital, Candos,Ministry of Health and Wellness, Mauritius                      | Bahadoor BS; Jannoo N; Manraj SS; Mathur H; Ramuth M; Sonoo J; Sujeewon C                                                                                                                                                                                                                                                                                                                                                                                                                                                                                                                                                                                                                                                                                                                                                                                                                                        |  |
| EPI_ISL_3217437                                                                                                                                                                                                                                                                                                                                                                                                                                                                                                                                               | Central Health Laboratory                                                                | Virology Department, Central Health Laboratory ,Victoria Hospital, Candos,Ministry of Health and Wellness, Mauritius | Bahadoor BS; Jannoo N; Manraj SS; Mathur H; Ramuth M; Sonoo J; Sujeewon C                                                                                                                                                                                                                                                                                                                                                                                                                                                                                                                                                                                                                                                                                                                                                                                                                                        |  |
| EPI_ISL_2834925                                                                                                                                                                                                                                                                                                                                                                                                                                                                                                                                               | Central Health Laboratory/Airport Health Laboratory                                      | Central Health Laboratory ,Victoria Hospital, Candos,Ministry of Health and Wellness, Mauritius                      | Bahadoor BS; Jannoo N; Manraj SS; Mathur H; Patoo M; Ramuth M; Sonoo J; Sujeewon C                                                                                                                                                                                                                                                                                                                                                                                                                                                                                                                                                                                                                                                                                                                                                                                                                               |  |
| EPI_ISL_2502407, EPI_ISL_2502413, EPI_ISL_2502416, EPI_ISL_2502429, EPI_ISL_2502430, EPI_ISL_2502441, EPI_ISL_2502479, EPI_ISL_2502480, EPI_ISL_2502493, EPI_ISL_2502494, EPI_ISL_2502500, EPI_ISL_2502527, EPI_ISL_2502545, EPI_ISL_2502553, EPI_ISL_2502575, EPI_ISL_3462539, EPI_ISL_3462553, EPI_ISL_3462560, EPI_ISL_3462561, EPI_ISL_3462578, EPI_ISL_3462580, EPI_ISL_3462582,                                                                                                                                                                         | see above                                                                                | Central Laboratory, Bureau of Public Health (BOG) and Academic Hospital Paramaribo                                   | Bas B Oude Munnink; Cherise Beek; Consuella Partowidjjojo; Dion Gajadin; Ed PF IJzerman; Emmanuelle Munger; Gary Gummels; Ingrid SK Krishnadath; Lyckde Woittiez; Marion PG Koopmans; Mireille Van de Veer; Phyllis Pinas; Princes Wongsowidjjojo; Radjesh Ori; Ranisha Doerbalie; Rohma Banwari; Soeradj Harkisoen; Stephen Vreden; Tilotmadiebie Ramlal; Verne Nanhoe                                                                                                                                                                                                                                                                                                                                                                                                                                                                                                                                          |  |
| EPI_ISL_693475, EPI_ISL_693477, EPI_ISL_693478, EPI_ISL_693482, EPI_ISL_1307644, EPI_ISL_1307674, EPI_ISL_1322328, EPI_ISL_1322330                                                                                                                                                                                                                                                                                                                                                                                                                            | see above                                                                                | Central Public Health Laboratory                                                                                     | Esorom Daoni; Lin Cui; Raymond Tzer Pin Lin; Sophie Octavia; Theresa Palou; Tze Minn Mak; Zhenyang Zhou                                                                                                                                                                                                                                                                                                                                                                                                                                                                                                                                                                                                                                                                                                                                                                                                          |  |
| EPI_ISL_1068370                                                                                                                                                                                                                                                                                                                                                                                                                                                                                                                                               | Central Public Health Laboratory - LACEN - Bahia, Salvador, Brazil                       | Central Public Health Laboratory - LACEN -Bahia, Salvador, Brazil                                                    | Arabela Leal; Breno Dominguez; Felicidade Pereira; Jaqueline Gomes; Luciana Oliveira; Luiz Alcantara; Marcela Gómez; Marta Giovanetti; Patrícia Cajado; Stephane Tosta; Wagner Fonseca; Vanessa Nardy                                                                                                                                                                                                                                                                                                                                                                                                                                                                                                                                                                                                                                                                                                            |  |
| EPI_ISL_3045169, EPI_ISL_3045204                                                                                                                                                                                                                                                                                                                                                                                                                                                                                                                              | Central Public Health Laboratory, National Public Health Organization                    | Central Public Health Laboratory, National Public Health Organization                                                | A.Katsoulidou et al; G.Spanakos; Kyriaki Tryfinopoulou                                                                                                                                                                                                                                                                                                                                                                                                                                                                                                                                                                                                                                                                                                                                                                                                                                                           |  |
| EPI_ISL_2232197                                                                                                                                                                                                                                                                                                                                                                                                                                                                                                                                               | Central Public Health Laboratory, National Public Health Organization                    | Greek Genome Center, Biomedical Research Foundation of the Academy of Athens (BRFAA)                                 | Dimitrios Thanos; Emmanouil Athanasiadis; Giannis Vatsellas; Katerina Zoi; Kyriaki Tryfinopoulou; Theodoros Loupis                                                                                                                                                                                                                                                                                                                                                                                                                                                                                                                                                                                                                                                                                                                                                                                               |  |
| EPI_ISL_2786923                                                                                                                                                                                                                                                                                                                                                                                                                                                                                                                                               | Central Virology Laboratory, Ministry of Health                                          | Central Virology Laboratory, Ministry of Health                                                                      | Amos Adler; Efrat Bucris; Ella Mendelson; Michal Mandelboim; Moran Shwartzwort-Cohen; Neta S. Zuckerman; Noam Protter; Oran Erster; Orna Mor; Saar Burstein                                                                                                                                                                                                                                                                                                                                                                                                                                                                                                                                                                                                                                                                                                                                                      |  |
| EPI_ISL_1312528                                                                                                                                                                                                                                                                                                                                                                                                                                                                                                                                               | Centrala laboratorija                                                                    | Latvian Biomedical Research and Study Centre                                                                         | Davids Fridmanis; Guntars Zarins; Ivars Silamikelis; Jana Osite; Janis Klovins; Janis Pjalkovskis; Jurijs Perevoscikovs; Kaspars Megnis; Laila Silamikele; Lauma Freimane; Laura Ansone; Liga Birzniece; Marta Priedite; Monta Ustinova; Nikita Zrelavs; Uga Dumpis; Una Krumina; Vita Rovite                                                                                                                                                                                                                                                                                                                                                                                                                                                                                                                                                                                                                    |  |
| EPI_ISL_1760556                                                                                                                                                                                                                                                                                                                                                                                                                                                                                                                                               | Centre Hospitalier Universitaire Mère-Enfant, Fondation Jeanne Ebori (CHUMFEJ)           | Centre de recherches médicales de Lambaréné (CERMEL)                                                                 | Ayola A. Adegnika; Ayong Moure; Bertrand Lell; Bénédicte Ndeboko; Emilio Skarwan; Georgelin Nguema Ondo; Gédéon P. Manouana; Haruka Abe; Jiro Yasuda; Joel Fleury Djoba Siawaya; Rodrigue Bikangu; Rotimi Myrabelle Avome Houechenou; Samira Zoa-Assoumou; Yuri Ushijima                                                                                                                                                                                                                                                                                                                                                                                                                                                                                                                                                                                                                                         |  |
| EPI_ISL_1001053, EPI_ISL_1001065                                                                                                                                                                                                                                                                                                                                                                                                                                                                                                                              | Centre Pasteur du Cameroun                                                               | Institut Pasteur de Dakar                                                                                            | Njoum Richard                                                                                                                                                                                                                                                                                                                                                                                                                                                                                                                                                                                                                                                                                                                                                                                                                                                                                                    |  |
| EPI_ISL_788934                                                                                                                                                                                                                                                                                                                                                                                                                                                                                                                                                | Centre de Recherche et de Formation en Infectiologie Guinée                              | TransVIHMI, IRD/INSERM/Monpellier University                                                                         | Abdoul Karim SOUMAH; Abdoulaye TOURE; Ahidjo AYOUBA; Alimou CAMARA; Alpha Kabinet KEITA; Bouna Yatassaye; Christelle BUTEL; ELIC DELAPORTE; Jean-leouis MONEMOU; Joel KOIVOGUI; Kaba KOUROUMA; Laetitia SERRANO; Mamadou Bhoeye KEITA; Mamadou Saliou BAH; Mamadou Saliou SOW; Mandiou DIAKITE; Martine PEETERS; Moriba POVOGUI; Penda Malhado DIALLO; Sakoba KEITA                                                                                                                                                                                                                                                                                                                                                                                                                                                                                                                                              |  |
| EPI_ISL_1913075, EPI_ISL_2434970, EPI_ISL_2434974, EPI_ISL_2434979                                                                                                                                                                                                                                                                                                                                                                                                                                                                                            | Centre de Recherches Médicales de Lambaréné (CERMEL)                                     | Centre de Recherches Médicales de Lambaréné (CERMEL)                                                                 | Anicet Mouity Matoumba; Bertrand Lell and Ayola Akim Adegnika; Georgelin Nguema Ondo; Gédéon Prince Manouana; Jean Bernard Lekana-Douki; Joël-Fleury Djoba Siawaya; Michel Ngonga Dikongo; Moustapha Nzamba Maleum; Rodrigue Bikangu; Sam O'neilla Oye Bingono; Samira Zoa Assoumou; Srinivas reddy Pallerla; Steffen Borrmann; Thirumalaisamy P. Velavan                                                                                                                                                                                                                                                                                                                                                                                                                                                                                                                                                        |  |

|                                                                                                                                                         |                                                                                                                                                    |                                                                                                                                                                    |                                                                                                                                                                                                                                                                                                                                                                                                                                                                                                                                                                                                                                                                                                                                                                                                                                                                                                                                                                                                                                                                                                                                                                                                                                                                                                                                                                                                                                                                                                                                                                                                                                                                                                                                                                                     |
|---------------------------------------------------------------------------------------------------------------------------------------------------------|----------------------------------------------------------------------------------------------------------------------------------------------------|--------------------------------------------------------------------------------------------------------------------------------------------------------------------|-------------------------------------------------------------------------------------------------------------------------------------------------------------------------------------------------------------------------------------------------------------------------------------------------------------------------------------------------------------------------------------------------------------------------------------------------------------------------------------------------------------------------------------------------------------------------------------------------------------------------------------------------------------------------------------------------------------------------------------------------------------------------------------------------------------------------------------------------------------------------------------------------------------------------------------------------------------------------------------------------------------------------------------------------------------------------------------------------------------------------------------------------------------------------------------------------------------------------------------------------------------------------------------------------------------------------------------------------------------------------------------------------------------------------------------------------------------------------------------------------------------------------------------------------------------------------------------------------------------------------------------------------------------------------------------------------------------------------------------------------------------------------------------|
| EPI_ISL_2442277, EPI_ISL_2442363                                                                                                                        |                                                                                                                                                    |                                                                                                                                                                    |                                                                                                                                                                                                                                                                                                                                                                                                                                                                                                                                                                                                                                                                                                                                                                                                                                                                                                                                                                                                                                                                                                                                                                                                                                                                                                                                                                                                                                                                                                                                                                                                                                                                                                                                                                                     |
| EPI_ISL_2968062, EPI_ISL_2968067                                                                                                                        | Centre de Virologie des Maladies Infectueuses Tropicales                                                                                           | Functional Genomic Platform UATRS-biology, CNRS                                                                                                                    | Ahmed REGGAD; Charifa DRISSI TOUZANI; Elmostafa BENAÏSSA; Elmostafa EL FAHIME; Hemlali Moushine; Hicham EL ANNAZ; Iddris-Amine LAHLOU; Khalid ENNIBI; Marouane MELLOUL; Mily Abdelaziz ELALAOUI; Mostafa ELOUENNASS; Nadia EL MRIMAR; Nadia TOUIL; Rachid ABI; Rida TAGAÏDID; Safae ELKOCRI; Sanaa ALAOUI-Amine; Youssef AKHOUID; Zohour KASMY                                                                                                                                                                                                                                                                                                                                                                                                                                                                                                                                                                                                                                                                                                                                                                                                                                                                                                                                                                                                                                                                                                                                                                                                                                                                                                                                                                                                                                      |
| EPI_ISL_428672                                                                                                                                          | Centre for Dengue Research                                                                                                                         | Centre for Dengue Research                                                                                                                                         | Ananda Wijewickrama; Chandima Jeewandara; Damayanthi Idampitig; Deshni Jayathilaka; Dinuka Ariyaratne; Diyanath Ranasinghe; Eranga Narangoda; Laksiri Gomes; Neelika Malavige                                                                                                                                                                                                                                                                                                                                                                                                                                                                                                                                                                                                                                                                                                                                                                                                                                                                                                                                                                                                                                                                                                                                                                                                                                                                                                                                                                                                                                                                                                                                                                                                       |
| EPI_ISL_792550, EPI_ISL_1717069, EPI_ISL_1717089, EPI_ISL_1717093, EPI_ISL_1970388, EPI_ISL_2481327, EPI_ISL_2803175, EPI_ISL_2803305                   |                                                                                                                                                    |                                                                                                                                                                    |                                                                                                                                                                                                                                                                                                                                                                                                                                                                                                                                                                                                                                                                                                                                                                                                                                                                                                                                                                                                                                                                                                                                                                                                                                                                                                                                                                                                                                                                                                                                                                                                                                                                                                                                                                                     |
| see above                                                                                                                                               | Centre for Dengue Research and A/CBU, Department of Immunology and Molecular Medicine                                                              | Centre for Dengue Research and A/CBU, Department of Immunology and Molecular Medicine                                                                              | Chandima Jeewandara; Deshan Madhusanka; Deshni Jayathilaka; Dinuka Ariyaratne; Diyanath Ranasinghe; Gathsaurie Neelika Malavige; Laksiri Gomes; Tibutus Thanesh Pramanayagam                                                                                                                                                                                                                                                                                                                                                                                                                                                                                                                                                                                                                                                                                                                                                                                                                                                                                                                                                                                                                                                                                                                                                                                                                                                                                                                                                                                                                                                                                                                                                                                                        |
| EPI_ISL_602566, EPI_ISL_668449                                                                                                                          | Centre for Dengue Research, Department of Immunology and Molecular Medicine                                                                        | Centre for Dengue Research, Department of Immunology and Molecular Medicine                                                                                        | Chandima Jeewandara; Deshni Jayathilaka; Dinuka Ariyaratne; Diyanath Ranasinghe; Gathsaurie Neelika Malavige; Laksiri Gomes                                                                                                                                                                                                                                                                                                                                                                                                                                                                                                                                                                                                                                                                                                                                                                                                                                                                                                                                                                                                                                                                                                                                                                                                                                                                                                                                                                                                                                                                                                                                                                                                                                                         |
| EPI_ISL_413214, EPI_ISL_417030                                                                                                                          | Centre for Infectious Diseases and Microbiology Laboratory Services                                                                                | NSW Health Pathology - Institute of Clinical Pathology and Medical Research; Westmead Hospital; University of Sydney                                               | Carter I; Chen SC; Eden J-S; Holmes EC; Kok J and Dwyer DE for the 2019-nCoV Study Group*; Maddocks S; O'Sullivan MV; Rahman H; Rockett R; Sintchenko V                                                                                                                                                                                                                                                                                                                                                                                                                                                                                                                                                                                                                                                                                                                                                                                                                                                                                                                                                                                                                                                                                                                                                                                                                                                                                                                                                                                                                                                                                                                                                                                                                             |
| EPI_ISL_837554, EPI_ISL_837556, EPI_ISL_837566, EPI_ISL_837573, EPI_ISL_837576                                                                          | Centro Nacional de Enfermedades Tropicales (CENETROP)                                                                                              | Laboratory of Respiratory Viruses and Measles, Oswaldo Cruz Institute, FIOCRUZ                                                                                     | Ana Carolina Mendonça; Anna Carolina Paixão; Cinthia Avila; Fernando Motta; Luciana Appolinario; Marilda Siqueira on behalf of the FioCruz COVID-19 Genomic Surveillance Network; Paola Resende; Roxana Loayza                                                                                                                                                                                                                                                                                                                                                                                                                                                                                                                                                                                                                                                                                                                                                                                                                                                                                                                                                                                                                                                                                                                                                                                                                                                                                                                                                                                                                                                                                                                                                                      |
| EPI_ISL_2274034                                                                                                                                         | Centro Nacional de Enfermedades Tropicales (CENETROP)                                                                                              | Laboratory of Respiratory Viruses and Measles, Oswaldo Cruz Institute, FIOCRUZ                                                                                     | Alice Sampaio Rocha; Ana Carolina Mendonça; Anna Carolina Paixão; Cinthia Avila; Elisa Cavalcante Pereira; Fernando Motta; Luciana Appolinario; Marilda Siqueira on behalf of the FioCruz COVID-19 Genomic Surveillance Network; Paola Resende; Renata Serrano Lopes; Roxana Loayza; Taina Venas                                                                                                                                                                                                                                                                                                                                                                                                                                                                                                                                                                                                                                                                                                                                                                                                                                                                                                                                                                                                                                                                                                                                                                                                                                                                                                                                                                                                                                                                                    |
| EPI_ISL_1531867, EPI_ISL_1531910                                                                                                                        | Centro de Diagnostico COVID-19 UABC Tijuana                                                                                                        | Andersen lab at Scripps Research                                                                                                                                   | German Ibarra; Jonathan Vincent Baena; Jorge Luis Jimenez Niebla; Manuel Sanchez Alavez; Oscar Efrén Zazueta Fierro; SEARCH Alliance San Diego with Idanya Rubi Serafin Higuerá                                                                                                                                                                                                                                                                                                                                                                                                                                                                                                                                                                                                                                                                                                                                                                                                                                                                                                                                                                                                                                                                                                                                                                                                                                                                                                                                                                                                                                                                                                                                                                                                     |
| EPI_ISL_2339903                                                                                                                                         | Centro de Estudio de Enfermedades Autoinmunes (CREA), Universidad del Rosario, Bogotá, Colombia                                                    | Centro de Investigaciones en Microbiología y Biotecnología-UR (CIMBIUR), Facultad de Ciencias Naturales, Universidad del Rosario, Bogotá, Colombia                 | Carolina Ramírez-Santana; Gustavo Salguero; Juan David Ramírez; Juan Esteban Gallo; Juan-Manuel Anaya; Luz H. Patiño; Marina Muñoz; Nathalia Ballesteros; Sergio Castañeda                                                                                                                                                                                                                                                                                                                                                                                                                                                                                                                                                                                                                                                                                                                                                                                                                                                                                                                                                                                                                                                                                                                                                                                                                                                                                                                                                                                                                                                                                                                                                                                                          |
| EPI_ISL_3825488                                                                                                                                         | Centro de Estudios Moleculares                                                                                                                     | Laboratorio de Biología Molecular, Instituto de Medicina Regional on behalf of 'Proyecto Argentino Interinstitucional de genómica de SARS-CoV-2' (PAIS Consortium) | Alexia Del Puerto; Bettina Brúsés; Cecilia Urquijo; Gerardo Deluca; Griselda Oria; Horacio Lucero.; Javier Mussin; Laura Formichelli; Melina Lorenzini Campos; Raúl Maximiliano Acevedo                                                                                                                                                                                                                                                                                                                                                                                                                                                                                                                                                                                                                                                                                                                                                                                                                                                                                                                                                                                                                                                                                                                                                                                                                                                                                                                                                                                                                                                                                                                                                                                             |
| EPI_ISL_3568785, EPI_ISL_3805311, EPI_ISL_3805316, EPI_ISL_3805324, EPI_ISL_3805361, EPI_ISL_3805364, EPI_ISL_3805367, EPI_ISL_3805413, EPI_ISL_3805760 | see above                                                                                                                                          | Centro de Investigación Biomedica de Occidente (CIBO)                                                                                                              | ; Alejandra García-Gasca; Alejandra Hernandez-Teran; Alejandro Sanchez-Flores; Alfredo Herrera-Estrella; Alicia Ocaña-Mondragón; Alicia Ocaña-Mondragón; Andreu Comas-García; Angel Gustavo Salas-Lais; Antonio Loza Roman; Bernardo Martínez-Miguel; Blanca Taboada; Brenda Irasema Maldonado-Meza; Bruno Gomez-Gil; Carla Ivon Herrera-Najera; Carlos F. Arias; Celia Boukadida; Celida Duque Molina; Celida Martínez- Rodríguez; Clara Esperanza Santacruz-Tinoco; Concepcion Grajales-Muñiz; Concepcion Grajales-Muñiz; Consorcio Mexicano de Vigilancia Genómica (CoVGen-Mex). Authors (in alphabetical order): Julio Elias Alvarado-Yaah; Cristóbal Cháidez-Quiroz; Daniel Fregoso-Rueda; Daniel Lira Morales; Eduardo Becerril-Vargas; Fernando Fontove-Herrera; Fidencio Mejía-Nepomuceno; Francisco Pulido; Gloria Elena Espinosa-Ayala; Gloria Maria Molina-Salinas; Gloria Vazquez; Hector Esteban Paz-Juarez; Hector Montoya-Fuentes; Helen Haydee Fernanda Ramirez-Plascencia; Irvin González-Lopez; Jean Pierre Gonzalez; Jesus Hernandez; Joel Armando Vazquez-Perez.; Jorge Salas-Hernandez; Jose Antonio Enciso-Moreno; Jose Arturo Martínez-Orozco; Jose Esteban Muñoz-Medina; Jose Esteban Muñoz-Medina; Jose de Jesus Nuñez-Contreras; Jose de Jesus Nuñez-Contreras; Juan Bautista Chale-Dzul; Julissa Enciso-Ibarra; Luis Alberto Ochoa-Carrera; Margarita Matias-Florentino; Maria Guadalupe Santiago-Mauricio; Maria Guadalupe de Jesus Mireles-Rivera; Mario Mujica-Sanchez; Marissa Perez-Garcia; Nelly Selem-Mojica; Pavel Isa; Ricardo Ciriá Merce; Ricardo Grande; Rosa Maria Gutierrez Rios; Santiago avila-Rios; Selene Zárate; Susana Lopez; Veronica Mata-Haro; Victor Eduardo García-Arias; Victor Hugo Borja-Aburto                              |
| EPI_ISL_2671512, EPI_ISL_2942501, EPI_ISL_2942768, EPI_ISL_3805422, EPI_ISL_3805435, EPI_ISL_3805440, EPI_ISL_3805444, EPI_ISL_3805449                  | see above                                                                                                                                          | Centro de Investigación Biomedica del Noreste (CIBIN)                                                                                                              | ; Alejandra García-Gasca; Alejandra Hernandez-Teran; Alejandro Sanchez-Flores; Alfredo Herrera-Estrella; Alicia Ocaña-Mondragón; Andreu Comas-García; Angel Gustavo Salas-Lais; Antonio Loza Roman; Bernardo Martínez-Miguel; Blanca Taboada; Brenda Irasema Maldonado-Meza; Bruno Gomez-Gil; Carla Ivon Herrera-Najera; Carlos F. Arias; Celia Boukadida; Celida Duque Molina; Celida Martínez- Rodríguez; Clara Esperanza Santacruz-Tinoco; Concepcion Grajales-Muñiz; Consorcio Mexicano de Vigilancia Genómica (CoVGen-Mex). Authors (in alphabetical order): Julio Elias Alvarado-Yaah; Cristóbal Cháidez-Quiroz; Daniel Fregoso-Rueda; Daniel Lira Morales; Eduardo Becerril-Vargas; Fernando Fontove-Herrera; Fidencio Mejía-Nepomuceno; Francisco Pulido; Gloria Elena Espinosa-Ayala; Gloria Maria Molina-Salinas; Gloria Vazquez; Hector Esteban Paz-Juarez; Hector Montoya-Fuentes; Helen Haydee Fernanda Ramirez-Plascencia; Irvin González-Lopez; Jean Pierre Gonzalez; Jesus Hernandez; Joel Armando Vazquez-Perez.; Jorge Salas-Hernandez; Jose Antonio Enciso-Moreno; Jose Arturo Martínez-Orozco; Jose Esteban Muñoz-Medina; Jose de Jesus Nuñez-Contreras; Juan Bautista Chale-Dzul; Julissa Enciso-Ibarra; Luis Alberto Ochoa-Carrera; Margarita Matias-Florentino; Maria Guadalupe de Jesus Mireles-Rivera; Mario Mujica-Sanchez; Marissa Perez-Garcia; Nelly Selem-Mojica; Pavel Isa; Ricardo Ciriá Merce; Ricardo Grande; Rosa Maria Gutierrez Rios; Santiago avila-Rios; Selene Zárate; Susana Lopez; Veronica Mata-Haro; Victor Eduardo García-Arias; Victor Hugo Borja-Aburto                                                                                                                                                                              |
| EPI_ISL_941127                                                                                                                                          | Centro de Investigaciones en Microbiología y Biotecnología-UR (CIMBIUR), Facultad de Ciencias Naturales, Universidad del Rosario, Bogotá, Colombia | Centro de Investigaciones en Microbiología y Biotecnología-UR (CIMBIUR), Facultad de Ciencias Naturales, Universidad del Rosario, Bogotá, Colombia                 | Adriana van de Guchte; Alberto Paniz-Mondolfi; Alejandro Feged-Rivadeneira; Ana S. Gonzalez-Reiche; Andrés Angel; Carolina Flórez; Carolina Hernández; Emilia Mia Sordillo; Felipe González-Casabianca; Hala Alejei Alshammary; Harm van Bakel; Iván Carroll; Jaime Cascante; Jayeeta Dutta; Juan David Ramirez; Luz Helena Patiño; Marina Muñoz; Matthew M. Hernandez; Mauricio Santos-Vega; Mónica Palma-Cuero; Nathalia Ballesteros; Sergio Gomez; Viviana Simon; Zenab Khan                                                                                                                                                                                                                                                                                                                                                                                                                                                                                                                                                                                                                                                                                                                                                                                                                                                                                                                                                                                                                                                                                                                                                                                                                                                                                                     |
| EPI_ISL_941946, EPI_ISL_941996                                                                                                                          | Centro de Investigaciones en Microbiología y Biotecnología-UR (CIMBIUR), Facultad de Ciencias Naturales, Universidad del Rosario, Bogotá, Colombia | Centro de Investigaciones en Microbiología y Biotecnología-UR (CIMBIUR), Facultad de Ciencias Naturales, Universidad del Rosario, Bogotá, Colombia                 | Adriana van de Guchte; Alberto Paniz-Mondolfi; Ana S. Gonzalez-Reiche; Carolina Flórez; Carolina Hernández; Emilia Mia Sordillo; Hala Alejei Alshammary; Harm van Bakel; Jayeeta Dutta; Juan David Ramírez; Luz Helena Patiño; Marina Muñoz; Matthew M. Hernandez; Nathalia Ballesteros; Sergio Gomez; Viviana Simon; Zenab Khan                                                                                                                                                                                                                                                                                                                                                                                                                                                                                                                                                                                                                                                                                                                                                                                                                                                                                                                                                                                                                                                                                                                                                                                                                                                                                                                                                                                                                                                    |
| EPI_ISL_697797                                                                                                                                          | Centro de Investigaciones, Universidad de Especialidades Espíritu Santo                                                                            | Institute of Microbiology, Universidad San Francisco de Quito                                                                                                      | Belén Prado-Vivár; Bernardo Gutiérrez; Derly Andrade; Edith Lopez; Fernando Espinoza; Gabriel Morey; Gabriel Trueba; Jose Pedro Barberan; Juan Carlos Fernandez; Juan José Guadalupe; Michelle Grunauer; Monica Becerra-Wong; Patricio Rojas-Silva; Paúl Cárdenas; Ruben Armas; Sully Márquez; Verónica Barragán                                                                                                                                                                                                                                                                                                                                                                                                                                                                                                                                                                                                                                                                                                                                                                                                                                                                                                                                                                                                                                                                                                                                                                                                                                                                                                                                                                                                                                                                    |
| EPI_ISL_1351549                                                                                                                                         | Centro de Investigación Biomédica de Occidente (CIBO)                                                                                              | Unidad de Genómica Avanzada                                                                                                                                        | Alejandro Sanchez-Flores; Alfredo Herrera-Estrella; Alicia Ocana-Mondragón; Angel Gustavo Salas-Lais; Bernardo Martínez-Miguel; Blanca Taboada; Brenda Irasema Maldonado-Meza; Carla Ivon Herrera-Najera; Carlos F. Arias; Celia Boukadida; Clara Esperanza Santacruz-Tinoco; Concepcion Grajales-Muniz; Consorcio Mexicano de Vigilancia Genómica (CoVGen-Mex). Authors (in alphabetical order): Julio Elias Alvarado-Yaah; Fernando Fontove-Herrera; Francisco Pulido; Gloria Elena Espinoza-Ayala; Gloria Maria Molina-Salinas; Gloria Vazquez; Hector Esteban Paz-Juarez; Hector Montoya-Fuentes; Helen Haydee Fernanda Ramirez-Plascencia; Jorge Ivan Salinal-Navarez; Jose Antonio Enciso-Moreno; Jose Esteban Munoz-Medina; Jose de Jesus Nunez-Contreras; Juan Bautista Chale-Dzul; Luis Alberto Ochoa-Carrera; Margarita Matias-Florentino; Maria Guadalupe Santiago-Mauricio; Maria Guadalupe de Jesus Mireles-Rivera; Nelly Selem-Mojica; Pavel Isa; Ricardo Grande; Santiago Avila-Rios; Victor Hugo Borja-Aburto                                                                                                                                                                                                                                                                                                                                                                                                                                                                                                                                                                                                                                                                                                                                                       |
| EPI_ISL_1351426                                                                                                                                         | Centro de Investigación Biomédica del Noreste (CIBIN)                                                                                              | Unidad de Genómica Avanzada                                                                                                                                        | Alejandro Sanchez-Flores; Alfredo Herrera-Estrella; Alicia Ocana-Mondragón; Angel Gustavo Salas-Lais; Bernardo Martínez-Miguel; Blanca Taboada; Brenda Irasema Maldonado-Meza; Carla Ivon Herrera-Najera; Carlos F. Arias; Celia Boukadida; Clara Esperanza Santacruz-Tinoco; Concepcion Grajales-Muniz; Consorcio Mexicano de Vigilancia Genómica (CoVGen-Mex). Authors (in alphabetical order): Julio Elias Alvarado-Yaah; Fernando Fontove-Herrera; Francisco Pulido; Gloria Elena Espinoza-Ayala; Gloria Maria Molina-Salinas; Gloria Vazquez; Hector Esteban Paz-Juarez; Hector Montoya-Fuentes; Helen Haydee Fernanda Ramirez-Plascencia; Jorge Ivan Salinal-Navarez; Jose Antonio Enciso-Moreno; Jose Esteban Munoz-Medina; Jose de Jesus Nunez-Contreras; Juan Bautista Chale-Dzul; Luis Alberto Ochoa-Carrera; Margarita Matias-Florentino; Maria Guadalupe Santiago-Mauricio; Maria Guadalupe de Jesus Mireles-Rivera; Nelly Selem-Mojica; Pavel Isa; Ricardo Grande; Santiago Avila-Rios; Victor Hugo Borja-Aburto                                                                                                                                                                                                                                                                                                                                                                                                                                                                                                                                                                                                                                                                                                                                                       |
| EPI_ISL_732778                                                                                                                                          | Centro de Investigación Biomédica de La Rioja - Hospital San Pedro Logroño                                                                         | SeqCOVID-SPAIN consortium/IBV(CSIC)                                                                                                                                | Jose Manuel Azcona Gutiérrez; María Pilar Bea Escudero; María de Toro; Miriam Blasco Alberdi and SeqCOVID-SPAIN consortium                                                                                                                                                                                                                                                                                                                                                                                                                                                                                                                                                                                                                                                                                                                                                                                                                                                                                                                                                                                                                                                                                                                                                                                                                                                                                                                                                                                                                                                                                                                                                                                                                                                          |
| EPI_ISL_2490494                                                                                                                                         | Centro de Investigación Biomédica de Occidente (CIBO)                                                                                              | Centro de Investigación en Enfermedades Infecciosas (CIENI), Instituto Nacional de Enfermedades Respiratorias (INER)                                               | ; Alejandra García-Gasca; Alejandra Hernández-Terán; Alejandro Sanchez-Flores; Alfredo Herrera-Estrella; Alicia Ocaña-Mondragón; Andreu Comas-García; Angel Gustavo Salas-Lais; Antonio Loza Román; Bernardo Martínez-Miguel; Blanca Taboada; Brenda Irasema Maldonado-Meza; Bruno Gomez-Gil; Carla Ivón Herrera-Najera; Carlos F. Arias; Celia Boukadida; Clara Esperanza Santacruz-Tinoco; Concepción Grajales-Muñiz; Consorcio Mexicano de Vigilancia Genómica (CoVGen-Mex). Authors (in alphabetical order): Julio Elias Alvarado-Yaah; Cristóbal Cháidez-Quiroz; Celida Duque Molina; Celida Martínez- Rodríguez; Daniel Lira Morales; Eduardo Becerril-Vargas; Fernando Fontove-Herrera; Fidencio Mejía-Nepomuceno; Francisco Pulido; Gloria Elena Espinosa-Ayala; Gloria Maria Molina-Salinas; Gloria Vazquez; Hector Esteban Paz-Juárez; Hector Montoya-Fuentes; Helen Haydee Fernanda Ramirez-Plascencia; Irvin González-López; Jean Pierre González; Joel Armando Vázquez-Pérez.; Jorge Salas-Hernández; José Antonio Enciso-Moreno; José Arturo Martínez-Orozco; José Esteban Muñoz-Medina; José de Jesús Nuñez-Contreras; Juan Bautista Chale-Dzul; Julissa Enciso-Ibarra; Luis Alberto Ochoa-Carrera; Margarita Matias-Florentino; Maria Guadalupe Santiago-Mauricio; Maria Guadalupe de Jesús Mireles-Rivera; Nelly Sélem-Mojica; Pavel Isa; Ricardo Ciriá Merce; Ricardo Grande; Rosa Maria Gutierrez Rios; Santiago Avila-Rios; Selene Zárate; Susana Lopez; Victor Eduardo García-Arias; Victor Hugo Borja-Aburto                                                                                                                                                                                                                                                  |
| EPI_ISL_2801708, EPI_ISL_2801721, EPI_ISL_280173, EPI_ISL_2801746                                                                                       | Centro de Investigación Biomédica de Occidente (CIBO)                                                                                              | Instituto de Biotecnología de la UNAM                                                                                                                              | ; Alejandra García-Gasca; Alejandra Hernández-Terán; Alejandro Sánchez-Flores; Alfredo Herrera-Estrella; Andreu Comas-García; Angel Gustavo Salas-Lais; Antonio Loza Román; Bernardo Martínez-Miguel; Blanca Taboada; Brenda Irasema Maldonado-Meza; Bruno Gómez-Gil; Carla Ivón Herrera-Najera; Carlos F. Arias; Celia Boukadida; Clara Esperanza Santacruz-Tinoco; Concepción Grajales-Muñiz; Consorcio Mexicano de Vigilancia Genómica (CoVGen-Mex). Authors (in alphabetical order): Julio Elias Alvarado-Yaah; Cristóbal Cháidez-Quiroz; Celida Duque Molina; Celida Martínez- Rodríguez; Daniel Lira Morales; Eduardo Becerril-Vargas; Fernando Fontove-Herrera; Fidencio Mejía-Nepomuceno; Francisco Pulido; Gloria Elena Espinosa-Ayala; Gloria Maria Molina-Salinas; Gloria Vazquez; Hector Esteban Paz-Juárez; Hector Montoya-Fuentes; Helen Haydee Fernanda Ramirez-Plascencia; Irvin González-López; Jean Pierre González; Jesús Hernández; Joel Armando Vázquez-Pérez.; Jorge Salas-Hernández; Jose Antonio Enciso-Moreno; Jose Arturo Martínez-Orozco; Jose Esteban Muñoz-Medina; José de Jesús Nuñez-Contreras; Juan Bautista Chale-Dzul; Julissa Enciso-Ibarra; Luis Alberto Ochoa-Carrera; Margarita Matias-Florentino; Mario Mujica-Sánchez; Marissa Perez-Garcia; Maria Guadalupe Santiago-Mauricio; Maria Guadalupe de Jesús Mireles-Rivera; Nelly Sélem-Mojica; Pavel Isa; Ricardo Ciriá Merce; Ricardo Grande; Rosa Maria Gutierrez Rios; Santiago Avila-Rios; Selene Zárate; Susana Lopez; Victor Eduardo García-Arias; Victor Hugo Borja-Aburto                                                                                                                                                                                                             |
| EPI_ISL_2402174, EPI_ISL_2402178                                                                                                                        | Centro de Investigación Biomédica de Occidente (CIBO)                                                                                              | Unidad de Genómica Avanzada                                                                                                                                        | Alejandro Sanchez-Flores; Alfredo Herrera-Estrella; Alicia Ocana-Mondragón; Angel Gustavo Salas-Lais; Bernardo Martínez-Miguel; Blanca Taboada; Brenda Irasema Maldonado-Meza; Carla Ivon Herrera-Najera; Carlos F. Arias; Celia Boukadida; Clara Esperanza Santacruz-Tinoco; Concepcion Grajales-Muniz; Consorcio Mexicano de Vigilancia Genómica (CoVGen-Mex). Authors (in alphabetical order): Julio Elias Alvarado-Yaah; Fernando Fontove-Herrera; Francisco Pulido; Gloria Elena Espinoza-Ayala; Gloria Maria Molina-Salinas; Gloria Vazquez; Hector Esteban Paz-Juarez; Hector Montoya-Fuentes; Helen Haydee Fernanda Ramirez-Plascencia; Jorge Ivan Salinal-Navarez; Jose Antonio Enciso-Moreno; Jose Esteban Munoz-Medina; Jose de Jesus Nunez-Contreras; Juan Bautista Chale-Dzul; Luis Alberto Ochoa-Carrera; Margarita Matias-Florentino; Maria Guadalupe Santiago-Mauricio; Maria Guadalupe de Jesus Mireles-Rivera; Nelly Selem-Mojica; Pavel Isa; Ricardo Grande; Santiago Avila-Rios; Victor Hugo Borja-Aburto                                                                                                                                                                                                                                                                                                                                                                                                                                                                                                                                                                                                                                                                                                                                                       |
| EPI_ISL_2490340, EPI_ISL_2490442, EPI_ISL_3355408, EPI_ISL_3556953                                                                                      | Centro de Investigación Biomédica del Noreste (CIBIN)                                                                                              | Centro de Investigación en Enfermedades Infecciosas (CIENI), Instituto Nacional de Enfermedades Respiratorias (INER)                                               | ; Alejandra García-Gasca; Alejandra García-Gasca; Alejandra Hernández-Terán; Alejandro Sanchez-Flores; Alejandro Sánchez-Flores; Alfredo Herrera-Estrella; Alicia Ocaña-Mondragón; Andreu Comas-García; Angel Gustavo Salas-Lais; Antonio Loza Román; Bernardo Martínez-Miguel; Blanca Taboada; Brenda Irasema Maldonado-Meza; Bruno Gomez-Gil; Bruno Gómez-Gil; Carla Ivón Herrera-Najera; Carlos F. Arias; Celia Boukadida; Clara Esperanza Santacruz-Tinoco; Concepción Grajales-Muñiz; Consorcio Mexicano de Vigilancia Genómica (CoVGen-Mex). Authors (in alphabetical order): Julio Elias Alvarado-Yaah; Cristóbal Cháidez-Quiroz; Celida Duque Molina; Celida Martínez- Rodríguez; Daniel Lira Morales; Eduardo Becerril-Vargas; Fernando Fontove-Herrera; Fidencio Mejía-Nepomuceno; Francisco Pulido; Gloria Elena Espinosa-Ayala; Gloria Maria Molina-Salinas; Gloria Vazquez; Hector Esteban Paz-Juárez; Hector Montoya-Fuentes; Helen Haydee Fernanda Ramirez-Plascencia; Irvin González-López; Helen Haydee Fernanda Ramirez-Plascencia; Irvin González-López; Jean Pierre González; Jesús Hernández; Joel Armando Vázquez-Pérez.; Jorge Salas-Hernández; Jose Antonio Enciso-Moreno; Jose Arturo Martínez-Orozco; Jose Esteban Muñoz-Medina; José de Jesús Nuñez-Contreras; Juan Bautista Chale-Dzul; Julissa Enciso-Ibarra; Kathia Elizabeth Tapia-Díaz; Luis Alberto Ochoa-Carrera; Margarita Matias-Florentino; Mario Mujica-Sánchez; Marissa Perez-Garcia; Maria Guadalupe Santiago-Mauricio; Maria Guadalupe de Jesús Mireles-Rivera; Nelly Sélem-Mojica; Pavel Isa; Ricardo Ciriá Merce; Ricardo Grande; Rosa Maria Gutierrez Rios; Santiago Avila-Rios; Selene Zárate; Susana Lopez; Veronica Mata-Haro; Victor Eduardo García-Arias; Victor Hugo Borja-Aburto |
| EPI_ISL_2801671, EPI_ISL_3347599, EPI_ISL_3347663, EPI_ISL_3347665                                                                                      | Centro de Investigación Biomédica del Noreste (CIBIN)                                                                                              | Instituto de Biotecnología de la UNAM                                                                                                                              | ; Alejandra García-Gasca; Alejandra Hernández-Terán; Alejandro Sánchez-Flores; Alfredo Herrera-Estrella; Alicia Ocaña-Mondragón; Andreu Comas-García; Angel Gustavo Salas-Lais; Antonio Loza Román; Bernardo Martínez-Miguel; Blanca Taboada; Brenda Irasema Maldonado-Meza; Bruno Gómez-Gil; Carla Ivón Herrera-Najera; Carlos F. Arias; Celia Boukadida; Clara Esperanza Santacruz-Tinoco; Concepción Grajales-Muñiz; Consorcio Mexicano de Vigilancia Genómica (CoVGen-Mex). Authors (in alphabetical order): Julio Elias Alvarado-Yaah; Cristóbal Cháidez-Quiroz; Celida Duque Molina; Celida Martínez- Rodríguez; Daniel Lira Morales; Eduardo Becerril-Vargas; Fernando Fontove-Herrera; Fidencio Mejía-Nepomuceno; Francisco Pulido; Gloria Elena Espinosa-Ayala; Gloria Maria Molina-Salinas; Gloria Vazquez; Hector Esteban Paz-Juárez; Hector Montoya-Fuentes; Helen Haydee Fernanda Ramirez-Plascencia; Irvin González-López; Jean Pierre González; Jesús Hernández; Joel Armando Vázquez-Pérez.; Jorge Salas-Hernández; Jose Antonio Enciso-Moreno; Jose Arturo Martínez-Orozco; Jose Esteban Muñoz-Medina; José de Jesús Nuñez-Contreras; Juan Bautista Chale-Dzul; Julissa Enciso-Ibarra; Kathia Elizabeth Tapia-Díaz; Luis Alberto Ochoa-Carrera; Margarita Matias-Florentino; Mario Mujica-Sánchez; Marissa Perez-Garcia; Maria Guadalupe Santiago-Mauricio; Maria Guadalupe de Jesús Mireles-Rivera; Nelly Sélem-Mojica; Pavel Isa; Ricardo Ciriá Merce; Ricardo Grande; Rosa Maria Gutierrez Rios; Santiago Avila-Rios; Selene Zárate; Susana Lopez; Veronica Mata-Haro; Victor Eduardo García-Arias; Victor Hugo Borja-Aburto                                                                                                                                    |
| EPI_ISL_2401935, EPI_ISL_2402005                                                                                                                        | Centro de Investigación Biomédica del Noreste (CIBIN)                                                                                              | Unidad de Genómica Avanzada                                                                                                                                        | Alejandro Sanchez-Flores; Alfredo Herrera-Estrella; Alicia Ocana-Mondragón; Angel Gustavo Salas-Lais; Bernardo Martínez-Miguel; Blanca Taboada; Brenda Irasema Maldonado-Meza; Carla Ivon Herrera-Najera; Carlos F. Arias; Celia Boukadida; Clara Esperanza Santacruz-Tinoco; Concepcion Grajales-Muniz; Consorcio Mexicano de Vigilancia Genómica (CoVGen-Mex). Authors (in alphabetical order): Julio Elias Alvarado-Yaah; Fernando Fontove-Herrera; Francisco Pulido; Gloria Elena Espinoza-Ayala; Gloria Maria Molina-Salinas; Gloria Vazquez; Hector Esteban Paz-Juarez; Hector Montoya-Fuentes; Helen Haydee Fernanda Ramirez-Plascencia; Irvin González-López; Julio Elias Alvarado-Yaah; Fernando Fontove-Herrera; Francisco Pulido; Gloria Elena Espinoza-Ayala; Gloria Maria Molina-Salinas; Gloria Vazquez; Hector Esteban Paz-Juarez; Hector Montoya-Fuentes; Helen Haydee Fernanda Ramirez-Plascencia; Irvin González-López; Jean Pierre González; Jesús Hernández; Joel Armando Vázquez-Pérez.; Jorge Salas-Hernández; Jose Antonio Enciso-Moreno; Jose Arturo Martínez-Orozco; Jose Esteban Muñoz-Medina; José de Jesús Nuñez-Contreras; Juan Bautista Chale-Dzul; Julissa Enciso-Ibarra; Kathia Elizabeth Tapia-Díaz; Luis Alberto Ochoa-Carrera; Margarita Matias-Florentino; Mario Mujica-Sánchez; Marissa Perez-Garcia; Maria Guadalupe Santiago-Mauricio; Maria Guadalupe de Jesús Mireles-Rivera; Nelly Sélem-Mojica; Pavel Isa; Ricardo Ciriá Merce; Ricardo Grande; Rosa Maria Gutierrez Rios; Santiago Avila-Rios; Selene Zárate; Susana Lopez; Veronica Mata-Haro; Victor Eduardo García-Arias; Victor Hugo Borja-Aburto                                                                                                                                   |

|                                                                                                                                                                                                         |                                                                                                                           |                                                                                                                                                     |                                                                                                                                                                                                                                                                                                                                                                                                                                                             |  |  |
|---------------------------------------------------------------------------------------------------------------------------------------------------------------------------------------------------------|---------------------------------------------------------------------------------------------------------------------------|-----------------------------------------------------------------------------------------------------------------------------------------------------|-------------------------------------------------------------------------------------------------------------------------------------------------------------------------------------------------------------------------------------------------------------------------------------------------------------------------------------------------------------------------------------------------------------------------------------------------------------|--|--|
| EPI_ISL_2442109                                                                                                                                                                                         | Centro de Investigação em Saúde de Manhiça (CISM) & iSGlobal, Institut de Salut Global de Barcelona                       | Instituto de Biomedicina de València - CSIC                                                                                                         | Paz-Juarez; Hector Montoya-Fuentes; Helen Haydee Fernanda Ramirez-Plascencia; Jorge Ivan Salinal-Nevarez; Jose Antonio Enciso-Moreno; Jose Esteban Munoz-Medina; Jose de Jesus Nunez-Contreras; Juan Bautista Chale-Dzul; Luis Alberto Ochoa-Carrera; Margarita Matias-Florentino; Maria Guadalupe Santiago-Mauricio; Maria Guadalupe de Jesus Mireles-Rivera; Nelly Selem-Mojica; Pavel Isa; Ricardo Grande; Santiago Avila-Rios; Víctor Hugo Borja-Aburto |  |  |
|                                                                                                                                                                                                         |                                                                                                                           |                                                                                                                                                     | Alfredo Mayor; Arsenia Massinga; Inacio Mandomando; Irving Cancino; Iñaki Comas; Manoli Torres Puente; Santiago Jiménez-Serrano                                                                                                                                                                                                                                                                                                                             |  |  |
| EPI_ISL_1396492, EPI_ISL_1396493                                                                                                                                                                        | Centro de Tecnología en Salud Pública de la Universidad Nacional de Rosario                                               | Laboratorio Mixto de Biotecnología Acuática (LMBA) on behalf of 'Proyecto Argentino Interinstitucional de genómica de SARS-CoV-2' (PAIS Consortium) | Adriana Giri; Agustina Cerri; Ana Cavatorta; Ana Paletta; Diego Chouhy; Elisa Bolatti; Elizabeth Tapia (argenTAG); Federico Remes Lenicov; Flavio Spetale; Gastón Viarengo; Ignacio García Labari; Javier Murillo; Joaquín Ezepeleta; Julian Acosta; Laura Angelone; Leandro Ciappina; María Re; Pablo Casal; Pilar Bulacio; Silvana Spinelli; Silvia Arranz; Sofia Lavista Llanos; Vanina Villanova; Victoria Posner                                       |  |  |
| EPI_ISL_2798497, EPI_ISL_2798902                                                                                                                                                                        | Centrālā Laboratorija, SIA                                                                                                | Riga East University Hospital, National Microbiology Reference Laboratory; Eurofins Genomics Europe Sequencing GmbH                                 | Arzu Algulieva; Diāna Dušacka; Dārta Pūpola; Ilva Pole; Jana Osīte; Jevgenijs Bodrenko; Jūlija Čevere; Reinis Vangravs; Reinis Zeltmatis; Sergejs Nikišins; Stella Lapīna; Ģirts Šķenders                                                                                                                                                                                                                                                                   |  |  |
| EPI_ISL_2646234                                                                                                                                                                                         | Cerballiance-IDF                                                                                                          | Cerba lab                                                                                                                                           | Aude Lessenne; Bénédicte Roquebert; Emmanuel Lecorche; Kader Merah; Laura Verdurme; Patrice Herisson; Sabine Trombert-Paolantoni; Stéphanie Haim-Boukobza; Thierry Collin                                                                                                                                                                                                                                                                                   |  |  |
| EPI_ISL_753879, EPI_ISL_754192                                                                                                                                                                          | Charité Universitätsmedizin Berlin, Institut für Virologie/Labor Berlin                                                   | Charité Universitätsmedizin Berlin, Institut für Virologie                                                                                          | Barbara Mühlemann; Christian Drosten; Julia Schneider; Jörn Beheim-Schwarzbach; Talitha Veith; Terry Jones; Victor M Corman                                                                                                                                                                                                                                                                                                                                 |  |  |
| EPI_ISL_3191217                                                                                                                                                                                         | Chiba Prefectural Institute of Public Health                                                                              | Division of Virology and Zoology, Chiba Prefectural Institute of Public Health                                                                      | Akihiro Takemura; Haruna Nishijima; Kentaro Itokawa; Makoto Kuroda; Mari Ohta; Masakatsu Taira; Masanori Hashino; Mika Takeuchi; Rina Tanaka; Shigenori Sato; Tsuyoshi Sekizuka; Yuji Hanada; Yuki Fujinuma                                                                                                                                                                                                                                                 |  |  |
| EPI_ISL_1931972                                                                                                                                                                                         | Chiba Prefectural Institute of Public Health                                                                              | Pathogen Genomics Center, National Institute of Infectious Diseases                                                                                 | Kentaro Itokawa; Makoto Kuroda; Masanori Hashino; Rina Tanaka; Tsuyoshi Sekizuka                                                                                                                                                                                                                                                                                                                                                                            |  |  |
| EPI_ISL_700333                                                                                                                                                                                          | Child Health Research Foundation                                                                                          | Child Health Research Foundation                                                                                                                    | Afroza Akter Tanni; Arif Mohammad Tanmoiy; Md Hafizur Rahman; Roly Malaker; Samir K Saha; Senjuti Saha; Sharmistha Goswami; Syed Mukhtadir Al Siyum                                                                                                                                                                                                                                                                                                         |  |  |
| EPI_ISL_2445989, EPI_ISL_2445997                                                                                                                                                                        | Chittagong General Hospital                                                                                               | Child Health Research Foundation                                                                                                                    | Adnan Mannan; CHRF Bangladesh Genomics Team; H. M. Hamidullah Mehedi; Md. Abdur Rob; Md. Minhazul Hoque; Rajdeep Biswas                                                                                                                                                                                                                                                                                                                                     |  |  |
| EPI_ISL_3118694                                                                                                                                                                                         | Chris Hani Baragwanath Academic Hospital POC laboratory                                                                   | KRISP, K2n Research Innovation and Sequencing Platform                                                                                              | Brown MJ; Emmanuel SJ; Giandhari J.; Lessells R.; Omar S.; Pillay S.; Tegally H.; Wadula J.; Wilkinson E.; Yajna R; de Oliveira T                                                                                                                                                                                                                                                                                                                           |  |  |
| EPI_ISL_2433537                                                                                                                                                                                         | Chulabhorn Hospital                                                                                                       | Division of Genomic Medicine and Innovation support,Department of Medical Sciences, Ministry of Public Health, Thailand                             | Archawin Rojanawiwat; Jirapha Pakdee; Natthakul Bunneang; Nuanjun Wichukchinda; Penpitcha Thawong; Pilailuk Akkapaiboon Okada; Pundharika Piboonsiri; Surakameth Mahasirimongkol; Waritta Sawaengdee                                                                                                                                                                                                                                                        |  |  |
| EPI_ISL_2523839                                                                                                                                                                                         | City Hospital No 40                                                                                                       | WHO National Influenza Centre Russian Federation                                                                                                    | Andrey Komissarov; Artem Fadeev; Daria Danilenko; Dmitry Lioznov; Elena Nabieva; Georgii Bazykin; Kirill Varchenko; Ksenia Safina; Kseniya Komissarova; Maria Pisareva; Maria Timofeeva; Mikhail Bakaev; Nikita Yolshin; Olga Shneider; Oula Mansour; Sergey Scherbak; Tamila Musaeva; Veronika Eder                                                                                                                                                        |  |  |
| EPI_ISL_636981                                                                                                                                                                                          | City of Chimoio                                                                                                           | KRISP, KZN Research Innovation and Sequencing Platform                                                                                              | Giandhari J.; Ismael N.; Nadia Siteo; Nedio Mabunda; Paulo Arnaldo; Pillay S.; Tegally H.; Wilkinson E.; de Oliveira T                                                                                                                                                                                                                                                                                                                                      |  |  |
| EPI_ISL_1250842                                                                                                                                                                                         | Clin & Gen Lab                                                                                                            | Molecular Genetics Laboratory, Instituto de Investigaciones Químicas, Universidad Mayor de San Andrés                                               | Aneth Vasquez Michel; Oscar M. Rollano-Peñaloza                                                                                                                                                                                                                                                                                                                                                                                                             |  |  |
| EPI_ISL_3545676                                                                                                                                                                                         | Clinic of infective diseases                                                                                              | Laboratory of virology and molecular diagnostics, Institute of Public Health                                                                        | Boshevskva G; Buzharova T; Janchevskva E.; Kuzmanovska M                                                                                                                                                                                                                                                                                                                                                                                                    |  |  |
| EPI_ISL_2467214, EPI_ISL_2490303, EPI_ISL_3242537                                                                                                                                                       | Clinica INDISA                                                                                                            | "Facultad de Ciencias de la Vida, UNAB"                                                                                                             | "Claudio Meneses; Ariel Orellana"; Claudio Olmos; Daniel Leon; Dayan Sanhueza; Eduardo Castro; Gonzalo Campaña; Macarena Bastias; Paola Pidal; Ricardo Yusta; Sebastian Wolter; Susana Saez; Víctor Monreal; Waldo Diaz                                                                                                                                                                                                                                     |  |  |
| EPI_ISL_1300656, EPI_ISL_1300657, EPI_ISL_2938118                                                                                                                                                       | Clinical Center, University of Sarajevo; Unit for Clinical Microbiology                                                   | Clinical Center, University of Sarajevo; Unit for Clinical Microbiology                                                                             | Amela Dedeić-Ljubović; Edina Zahirović; Golubinka Boshevskva; Irma Salimović-Bešić; Maja Kuzmanovska; Sandra Vegar-Zubović; Sebiha Izetbegović; Suzana Arapčić                                                                                                                                                                                                                                                                                              |  |  |
| EPI_ISL_911927                                                                                                                                                                                          | Clinical Diagnostics Laboratory, Diagnostic & Experimental Pathology, Lilly Research Laboratories                         | Clinical Diagnostics Laboratory, Diagnostic & Experimental Pathology, Lilly Research Laboratories                                                   | Andrew Schade; Angie Fulford; Erin Wray; Jeff Fill; Joe Oakley; John Calley; John McElwee; Leslie O'Neill Reising; Mayuri Vaidya; Pat Finnegan; Phil Ebert; Rachael Redmond; Sam McNeely; Tim Holzer                                                                                                                                                                                                                                                        |  |  |
| EPI_ISL_3832905                                                                                                                                                                                         | Clinical Lab, Aga Khan University Hospital                                                                                | Infectious Diseases Research Laboratory, Department of Pediatrics and Child Health                                                                  | Fatima Aziz; Furqan Kabir; Fyezah Jehan; Imran Nisar; Samiah Kanwar; Waqasuddin Khan; Zahra Hasan                                                                                                                                                                                                                                                                                                                                                           |  |  |
| EPI_ISL_3799753, EPI_ISL_3799757, EPI_ISL_3799772                                                                                                                                                       | Clinical Microbiology Lab, King Abdulaziz Medical City, Ministry of National Guard - Health Affairs, Riyadh, Saudi Arabia | Infectious Diseases Research, King Abdullah International Medical Research Center (KAIMRC), Riyadh, Saudi Arabia                                    | A.A.; Alghoribi; Alhayli, S.; Aljohani; Alswaji; Bu Ali, Z.; M.F.; Okdah, L.; S.M. and Doumith, M.                                                                                                                                                                                                                                                                                                                                                          |  |  |
| EPI_ISL_3534520                                                                                                                                                                                         | Clinical Microbiology Laboratory, Faculty of Medicine, Universitas Indonesia                                              | Faculty of Medicine, Universitas Indonesia                                                                                                          | Andi Yasmon; Anis Karuniawati; Ari Fahrial Syam; Augustine Natasha; Badriul Hegar; Beti Ernawati; Budi Wiweko; Fadilah; Fera Ibrahim; Fitrihyah; Khaerunissa Anbar Istiadi; Linda Erlina; Pratiwi Sudarmo; Rafika Indah Paramita                                                                                                                                                                                                                            |  |  |
| EPI_ISL_3155137                                                                                                                                                                                         | Clinical Microbiology, Infection Prevention and Control                                                                   | Section for Molecular Diagnostics                                                                                                                   | Björn Hallström; Jonas Björkman                                                                                                                                                                                                                                                                                                                                                                                                                             |  |  |
| EPI_ISL_2535722                                                                                                                                                                                         | Clinical Research Centre Hospital Sibu                                                                                    | Institute of Health and Community Medicine                                                                                                          | Chan Chia Jui; Chua Hock Hin; David Perera; Ooi Mong How; Tonii Sia Loong Loong; Wong Jyn Shan; Wong Kieng Aik                                                                                                                                                                                                                                                                                                                                              |  |  |
| EPI_ISL_582000, EPI_ISL_830822                                                                                                                                                                          | Clinical Virology                                                                                                         | Clinical Bacteriology                                                                                                                               | Adrian Egli; Alexander Gensch; Alfredo Mari; Christian Nickel; Hans Hirsch; Hans Pargger; Helena MB Seth-Smith; Julia Bielicki; Karoline Leuzinger; Kirstine K. Soegaard; Madlen Stange; Manuel Battegay; Martin Siegemund; Michael Osthoff; Michael Schweitzer; Myrta Brunner; Rita Schneider-Slifemalea; Rita Schneider-Sliwa; Roland Bingisser; Sarah Tschudin-Sutter; Simon Fuchs; Stefano Bassetti; Tim Roloff                                         |  |  |
| EPI_ISL_2035753                                                                                                                                                                                         | Clinical Virology                                                                                                         | Clinical Virology                                                                                                                                   | Anissa Chouikha; Henda Triki; Kais Ghedira; Mariem Gdoura; Sondos Haddad; Wasfi Fares                                                                                                                                                                                                                                                                                                                                                                       |  |  |
| EPI_ISL_3276958                                                                                                                                                                                         | Clinical Virology Laboratory, Institute of Liver and Biliary Sciences                                                     | ILBS                                                                                                                                                | Amit Pandey; Chhagan Bihari Sharma; Diptanu Paul; Ekta Gupta; Reshu Agarwal; Shiv Kumar Sarin; Varun Suroliya                                                                                                                                                                                                                                                                                                                                               |  |  |
| EPI_ISL_1169735, EPI_ISL_2194558, EPI_ISL_2311053, EPI_ISL_3842885                                                                                                                                      | Colorado Department of Public Health and Environment                                                                      | Colorado Department of Public Health and Environment                                                                                                | Alexandria Rossheim; Diana Ir; Emily A. Travanty; Laura Bankers; Mandy Waters; Michael Martin; Molly C. Hetherington-Rauth; Sarah Elizabeth Totten; Shannon Ely; Shannon R. Matzinger                                                                                                                                                                                                                                                                       |  |  |
| EPI_ISL_3127898, EPI_ISL_3303926                                                                                                                                                                        | Commonwealth Healthcare Center                                                                                            | Centers for Disease Control and Prevention Division of Viral Diseases, Pathogen Discovery                                                           | Alex Burgin; Ben L. Rambo-Martin; Clinton R. Paden; Dakota Howard; Dave Wentworth; Dhvani Batra; Jasmine Padilla; Justin Lee; Krista Queen; Kristen Knipe; Kristine Lacek; Mark Burroughs; Matthew Schmerer; Meghan Bentz; Mili Sheth; Peter Cook; Sam Shepard; Sarah Nobles; Suxiang Tong; Vivien Dugan; Yvette Unoarumhi                                                                                                                                  |  |  |
| EPI_ISL_632262, EPI_ISL_632272, EPI_ISL_682301, EPI_ISL_1660437, EPI_ISL_1660464, EPI_ISL_2622085, EPI_ISL_2715288, EPI_ISL_2812555, EPI_ISL_2932621, EPI_ISL_2992105, EPI_ISL_3568653, EPI_ISL_3663309 | see above                                                                                                                 | Communicable Disease Laboratory, Public Health Directorate                                                                                          | AlAbbas, Z.; AlHuairi, Z.; AlTaif, Z.; AlWasti, H.; Almoamen, G.; Altaif, Z.; Alwasti, H.; Marhoon, A.; Touq, M.                                                                                                                                                                                                                                                                                                                                            |  |  |
| EPI_ISL_2562567                                                                                                                                                                                         | Creighton University Medical Center                                                                                       | Creighton COVID Consortium                                                                                                                          | Cynthia Watson; Holly Stessman; Jake Siedlik; Michael Belshan; Richard Goering                                                                                                                                                                                                                                                                                                                                                                              |  |  |
| EPI_ISL_3105882                                                                                                                                                                                         | Cruz-Rabe Maternity and General Hospital                                                                                  | Research Institute for Tropical Medicine                                                                                                            | Clyde Daput; Deana Mae Ocampo; Emmanuel Kagning Tsinda; Francisco Gerardo Polotan; Hitoshi Oshitani; Inez Andrea Medado; Jefferson Earl Halog; Joana Ina Manalo; Lei Lanna Dancel; Ma Angelica Tujan; Mariko Saito-Obata; Mayuko Saito; Michiko Okamoto; Samantha Louise Bado                                                                                                                                                                               |  |  |
| EPI_ISL_2784152                                                                                                                                                                                         | Curative Labs                                                                                                             | Curative Labs                                                                                                                                       | Elias L. Salfati; Eugenia Khorosheva; George Way; J.Cesar Ignacio-Espinoza; Janet Chen; Mikhail Hanewich-Hollatz; Nabjot Sandhu; Sophia Quasem; Vladimir Slepnev; Zhiyi Xie                                                                                                                                                                                                                                                                                 |  |  |
| EPI_ISL_3664264                                                                                                                                                                                         | DASA                                                                                                                      | DASA                                                                                                                                                | Adriano Bonaldi; Angelica Hristov; Annellese Lopes; Bianca Cota; Cristina Oliveira; Jose Levi; Lidia Yamamoto; Paulo Pierry; Rodrigo Guarischi; Rodrigo Salazar                                                                                                                                                                                                                                                                                             |  |  |
| EPI_ISL_2383998                                                                                                                                                                                         | DC Public Health Lab/ Dept. of Forensic Sciences                                                                          | Centers for Disease Control and Prevention Division of Viral Diseases, Pathogen Discovery                                                           | Alison Laufer Halpin; Ben L. Rambo-Martin; Clinton R. Paden; Dakota Howard; Darlene Wagner; Dave Wentworth; Dhvani Batra; Jasmine Padilla; Justin Lee; Katie Dillon; Krista Queen; Kristen Knipe; Kristine Lacek; Mark Burroughs; Matthew Schmerer; Mili Sheth; Peter Cook; Sam Shepard; Sarah Nobles; Shoshona Le; Suxiang Tong; Vivien Dugan; Yvette Unoarumhi                                                                                            |  |  |
| EPI_ISL_2176242, EPI_ISL_2176257, EPI_ISL_3031753                                                                                                                                                       | DC Public Health Lab/ Dept. of Forensic Sciences                                                                          | DC Public Health Lab/ Dept. of Forensic Sciences                                                                                                    | Brittany Hamilton; Connie Maza; David Payne; Elizabeth Zelaya; Janis Doss; Jocelyn Hauser; Monica Mann; Sarah Scott; Scott Nguyen                                                                                                                                                                                                                                                                                                                           |  |  |
| EPI_ISL_2840443                                                                                                                                                                                         | DE Public Health Laboratory                                                                                               | Centers for Disease Control and Prevention Division of Viral Diseases, Pathogen Discovery                                                           | Alison Laufer Halpin; Ben L. Rambo-Martin; Clinton R. Paden; Dakota Howard; Darlene Wagner; Dave Wentworth; Dhvani Batra; Jasmine Padilla; Justin Lee; Katie Dillon; Krista Queen; Kristen Knipe; Kristine Lacek; Mark Burroughs; Matthew Schmerer; Mili Sheth; Peter Cook; Sam Shepard; Sarah Nobles; Shoshona Le; Suxiang Tong; Vivien Dugan; Yvette Unoarumhi                                                                                            |  |  |
| EPI_ISL_2983222, EPI_ISL_2983224, EPI_ISL_2987211, EPI_ISL_2987214                                                                                                                                      | DNA Labs                                                                                                                  | National Reference Laboratory, Nigeria Centre for Disease Control                                                                                   | Anthony Ahumbe; Catherine Okoi; Chimaobi Chukwu; Dr Chikwe Ihekweazu; Dr Ndodo Nnaemeka; Dr Omoare Adesuyi; Nwando Mba; Olusola Anuoluwapo Akanbi                                                                                                                                                                                                                                                                                                           |  |  |
| EPI_ISL_3216489                                                                                                                                                                                         | DOHMH Corona                                                                                                              | New York City Public Health Laboratory                                                                                                              | Jade Wang; et al.                                                                                                                                                                                                                                                                                                                                                                                                                                           |  |  |
| EPI_ISL_2383735, EPI_ISL_3692737                                                                                                                                                                        | DPHL                                                                                                                      | Delaware Public Health Lab                                                                                                                          | Rebecca Savage                                                                                                                                                                                                                                                                                                                                                                                                                                              |  |  |
| EPI_ISL_2595860, EPI_ISL_2595803, EPI_ISL_2597312, EPI_ISL_2612300                                                                                                                                      | DSMRC                                                                                                                     | DSMRC                                                                                                                                               | Khine Zaw Oo; Ko Ko Lwin; Ko Ko Win; Kyee Myint; Nay Myo Aung; Pai Khant Kyaw; Phyo Kyaw Aung; Thet Wai Oo; Zaw Win Htun                                                                                                                                                                                                                                                                                                                                    |  |  |
| EPI_ISL_416542                                                                                                                                                                                          | Dasman Diabetes Institute                                                                                                 | Dasman Diabetes Institute                                                                                                                           | Ebaa AOziari; Fahd Al-Mulla; Motasem Melhem; Qais Al-Duwairi; Rasheeba Iqbal; Sara Al-Qabandi; Sumi John                                                                                                                                                                                                                                                                                                                                                    |  |  |

|                                                                                                     |                                                                                                                                                                                                           |                                                                                                                                                                                         |                                                                                                                                                                                                                                                                                                                                                                                                                                                                                                                                                                                                                        |
|-----------------------------------------------------------------------------------------------------|-----------------------------------------------------------------------------------------------------------------------------------------------------------------------------------------------------------|-----------------------------------------------------------------------------------------------------------------------------------------------------------------------------------------|------------------------------------------------------------------------------------------------------------------------------------------------------------------------------------------------------------------------------------------------------------------------------------------------------------------------------------------------------------------------------------------------------------------------------------------------------------------------------------------------------------------------------------------------------------------------------------------------------------------------|
| EPI_ISL_2648218                                                                                     | Debswana Orapa Mine Hospital Laboratory                                                                                                                                                                   | Botswana Harvard HIV Reference Laboratory                                                                                                                                               | Boitumelo Zuze; Botshelo Radibe; Dorcas Maruapula; Joseph Makhema; Keoratlhe Ntshambiwa; Koketso Maotwe; Legodile Kooeplile; Lesedi Magama; Madisa Mine; Mosepele Mosepele; Mpo Molapisi; Ontlametse T. Bareng; Roger Shapiro; Shahin Lockman; Sikhulile Moyo; Simani Gasetsiwe; Thongbotho Mphoyagosi; Wonderful T. Choga                                                                                                                                                                                                                                                                                             |
| EPI_ISL_476894                                                                                      | Defence Research & Development Establishment (DRDE)                                                                                                                                                       | Defence Research & Development Establishment (DRDE)                                                                                                                                     | Ambuj Shrivastava; Jyoti S. Kumar; Paban Kumar Dash; Shashi Sharma; Sushil Kumar Sharma                                                                                                                                                                                                                                                                                                                                                                                                                                                                                                                                |
| EPI_ISL_693707                                                                                      | Delaware Public Health Laboratory                                                                                                                                                                         | Delaware Public Health Laboratory                                                                                                                                                       | Gregory Hovan                                                                                                                                                                                                                                                                                                                                                                                                                                                                                                                                                                                                          |
| EPI_ISL_2432953                                                                                     | Demy Health                                                                                                                                                                                               | National Reference Laboratory, Nigeria Centre for Disease Control                                                                                                                       | Anthony Ahumibe; Catherine Okoi; Chimaobi Chukwu; Dr Chikwe Ihekweazu; Dr Ndodo Nnaemeka; Dr Omoare Adesuyi; Grace Esebanmen; Naidoo Dhamari; Nwando Mba; Olusola Anuoluwapo Akanbi                                                                                                                                                                                                                                                                                                                                                                                                                                    |
| EPI_ISL_3631654                                                                                     | DemyHealth Laboratory                                                                                                                                                                                     | National Reference Laboratory, Nigeria Centre for Disease Control                                                                                                                       | Anthony Ahumibe; Catherine Okoi; Celestina Obiekea; Chimaobi Chukwu; Dr Chikwe Ihekweazu; Dr Ndodo Nnaemeka; Dr Omoare Adesuyi; Nwando Mba; Olusola Anuoluwapo Akanbi                                                                                                                                                                                                                                                                                                                                                                                                                                                  |
| EPI_ISL_1340751, EPI_ISL_1340753, EPI_ISL_1340755, EPI_ISL_1340758, EPI_ISL_1340761, EPI_ISL_516927 | Departamento de Virologia, Laboratorio Central de Salud Pública, Avenida Venezuela y Teniente Escurra, Asunción, Paraguay                                                                                 | Laboratory of Respiratory Viruses and Measles, Oswaldo Cruz Institute, FIOCRUZ                                                                                                          | Alice Sampaio Rocha; Ana Carolina Mendonca; Anna Carolina Paixao; Cynthia Vazquez; Fernando Motta; Luciana Appolinario; Marilda Siqueira on behalf of the Fiocruz COVID-19 Genomic Surveillance Network; Paola Resende; Renata Serrano Lopes                                                                                                                                                                                                                                                                                                                                                                           |
|                                                                                                     | Department for Molecular Diagnostics, Centre for Medical Microbiology, Institute of Public Health of Montenegro                                                                                           | Charité Universitätsmedizin Berlin, Institut für Virologie                                                                                                                              | Barbara Muehlemann; Christian Drosten; Julia Schneider; Jörn Beheim-Schwarzbach; Marija Govedarica and Danijela Vujošević; Talitha Veith; Terry Jones; Victor M Corman                                                                                                                                                                                                                                                                                                                                                                                                                                                 |
| EPI_ISL_471529, see above                                                                           | EPI_ISL_754180, EPI_ISL_1914599, EPI_ISL_1914784, EPI_ISL_1914785, EPI_ISL_3076898, EPI_ISL_3076933, EPI_ISL_3098700, EPI_ISL_3204249, EPI_ISL_3204255, EPI_ISL_3204260, EPI_ISL_3208827, EPI_ISL_3209246 | Department for Virology, Molecular Biology and Genome Research, R. G. Lugar Center for Public Health Research, National Center for Disease Control and Public Health (NCDC) of Georgia. | Adam Kotorashvili; Amiran Gamkrelidze.; Ana Papkiauri; Ann Machablishvili; Anna Kasradze; Davit Tsaguria; Ekaterine Khmaladze; Ekaterine Zangaladze; Ekaterine Zhgenti; Giorgi Gogoladze; Giorgi Tomashvili; Gvantsa Brachveli; Gvantsa Chanturia; Irma Burjanadze; Ketevan Sidamonidze; Khatuna Zakhashvili; Lela Sabadze; Lela Urushadze; Magda Dgebuadze; Maia Alkhashvili; Mari Gavashelidze; Mariam Zakalashvili; Marine Murtskhvaladze; Meri Pantisulaia; Nato Kotaria; Nino Berishvili; Nino Chikhovani; Paata Imnadze; Roena Sukhlishvili; Salome Javashvili; Tamar Jashlishvili; Tata Imnadze; Tea Tvedoradze |
| EPI_ISL_2723564, EPI_ISL_2840859, EPI_ISL_2863931                                                   | Department of Acute Infectious Diseases Control and Prevention, Yunnan Provincial Center for Disease Control and Prevention                                                                               | Department of Acute Infectious Diseases Control and Prevention, Yunnan Provincial Center for Disease Control and Prevention                                                             | Jienan Zhou; Meiling Zhang; Senquan Jia; Xiaoqing Fu; Zhaosheng Liu                                                                                                                                                                                                                                                                                                                                                                                                                                                                                                                                                    |
| EPI_ISL_2666982, see above                                                                          | EPI_ISL_2668207, EPI_ISL_2669198, EPI_ISL_2744063, EPI_ISL_2992629, EPI_ISL_3103998, EPI_ISL_3141987, EPI_ISL_3530600, EPI_ISL_3531615, EPI_ISL_3806268                                                   | Statens Serum Institut Bioinformatics and Microbial Genomics                                                                                                                            | Danish Covid-19 Genome Consortium                                                                                                                                                                                                                                                                                                                                                                                                                                                                                                                                                                                      |
| EPI_ISL_2483896                                                                                     | Department of Clinical Microbiology                                                                                                                                                                       | GIGA Medical Genomics                                                                                                                                                                   | Bouchra Boujemla; Cécile Meex; Keith Durkin; Maria Artesi; Marie-Pierre Hayette; Nathalie Renotte; Pierrette Melin; Raphaël Boreux; Sébastien Bontems; Vincent Bours                                                                                                                                                                                                                                                                                                                                                                                                                                                   |
| EPI_ISL_452074                                                                                      | Department of Clinical Microbiology, Copenhagen University Hospital, Hvidovre, Kettegaard Alle 30, 2650 Hvidovre.                                                                                         | Albertsen lab, Department of Chemistry and Bioscience, Aalborg University, Denmark                                                                                                      | Rasmus Kirkegaard                                                                                                                                                                                                                                                                                                                                                                                                                                                                                                                                                                                                      |
| EPI_ISL_419250                                                                                      | Department of Clinical Pathology, Pamela Youde Nethersole Eastern Hospital                                                                                                                                | Department of Health Technology and Informatics, Faculty of Health and Social Science, The Hong Kong Polytechnic University                                                             | Alan Ka-Lun WU; Alex Yat-Man HO; Barry Kin-Chung WONG; David Ho-Keung SHUM; Eugene Yuk-Keung TSO; Gilman Kit-Hang SIU; Hui-Yin LAO; Kam-Tong YIP; Kenneth Siu-Sing LEUNG; Kingsley King-Gee TAM; Kit-Man SIN; Kitty Sau-Chun FUNG; Kwok-Cheung LUNG; Lam-Kwong LEE; Man-Chun CHAN; Ming-Pan CHOI; Miranda Chong-Yee YAU; Raymond Wai-To LIU; Sandy Ka-Yee CHAU; Shea Ping YIP; Tak-Lun QUE; Timothy Ting-Leung NG; Wai-Shing LEUNG; Wing Cheong YAM; Wing-Kin TO; Yuk-Yung NG                                                                                                                                          |
| EPI_ISL_2378703, EPI_ISL_2378704                                                                    | Department of Health Technology and Informatics, The Hong Kong Polytechnic University                                                                                                                     | Department of Health Technology and Informatics, The Hong Kong Polytechnic University                                                                                                   | A.K.-L.; A.Y.-M.; B.H.-S.; B.P.-H.; C.T.-M.; Chan; Chen, H.; Cheng; D.C.; D.S.-H.; E.Y.-K.; E.Y.-W.; G.K.-H.; H.-C.; H.-Y.; H.W.-H.; Ho; J.S.-L.; J.Y.-W.; Jim; K.-Y.; K.K.; K.K.-G.; K.K.-S.; K.K.-W.; K.N.; K.S.-S.; L.-K.; Lai; Lam; Lao; Lee; Leung; Lo; Lu; Luk; S.; Lung; M.-C.; M.C.-Y.; Mok; Ng; R.A.; S.-C.; Siu; T.T.-L.; Tam; To; Tse, H.; V.C.-C.; W.-K.; W.-S.; Wong; Wu; Y.W.-M.; Yau; Yeh; Yuen                                                                                                                                                                                                         |
| EPI_ISL_2713174, EPI_ISL_2713218, EPI_ISL_2713220, EPI_ISL_2713266, EPI_ISL_3105863                 | Department of Health Technology and Informatics, The Hong Kong Polytechnic University                                                                                                                     | Department of Health Technology and Informatics, The Hong Kong Polytechnic University                                                                                                   | Alan Ka-Lun WU; Alex Yat-Man HO; Barry Kin-Chung Wong; Chloe Toi-Mei Chan; David Ho-Keung Shum; Denise Sze-Hang Wong; Gilman Kit-Hang Siu; Hui-Yin Lao; Hoi-Ching Jim; Ivan Tak-Fai Wong; Jake Siu-Lun Leung; Kam-Tong Yip; Kenneth Siu-Sing Leung; Kingsley King-Gee Tam; Kitty Sau-Chun Fung; Kristine Luk; Lam-Kwong Lee; Miranda Chong-Yee Yau; Sandy Ka-Yee Chau; Shea Ping Yip; Tak-Lun Que; Timothy Ting-Leung Ng; Wing Cheong Yam; Wing-Hei Lo; Wing-Kin To; Yvette Wai-Man Lai                                                                                                                                |
| EPI_ISL_417444                                                                                      | Department of Healthcare Biotechnology, National University of Sciences and Technology (NUST)                                                                                                             | Department of Healthcare Biotechnology, National University of Sciences and Technology (NUST)                                                                                           | Corman; Ghani, E.; H.A.; Janjua; Javed, A.; Niazi; S.K.; Saqib, M.; V.M. and Zohaib, A.                                                                                                                                                                                                                                                                                                                                                                                                                                                                                                                                |
| EPI_ISL_1007671                                                                                     | Department of Internal Medicine, College of Medicine, Chosun University                                                                                                                                   | Department of Internal Medicine, College of Medicine, Chosun University                                                                                                                 | Dong-Min Kim                                                                                                                                                                                                                                                                                                                                                                                                                                                                                                                                                                                                           |
| EPI_ISL_1495831                                                                                     | Department of Laboratory Medicine, Division of Clinical Virology, University of Medicine, Vienna                                                                                                          | Berghaler laboratory, CeMM Research Center for Molecular Medicine of the Austrian Academy of Sciences                                                                                   | Andreas Berghaler; Anna Schedl; Bekir Erguner; Benedikt Agerer; Christoph Bock; Fabian Amman; Jan Laine; Lukas Endler; Maelle Le Moing; Martin Senekowitsch; Michael Schuster; Petr Triska; Thomas Penz                                                                                                                                                                                                                                                                                                                                                                                                                |
| EPI_ISL_538462, EPI_ISL_648670                                                                      | Department of Laboratory Medicine, Tan Tock Seng Hospital                                                                                                                                                 | Department of Laboratory Medicine, Tan Tock Seng Hospital                                                                                                                               | Barkham TMS; Chen YYC; Li C; Lim JX; Maurer-Stroh S; Nagarajan N; Sessions OM; Tang WY; Zair X                                                                                                                                                                                                                                                                                                                                                                                                                                                                                                                         |
| EPI_ISL_1678810                                                                                     | Department of Medical Microbiology & Infection prevention, Amsterdam University Medical Centers location AMC                                                                                              | Department of Medical Microbiology & Infection prevention, Amsterdam University Medical Centers location AMC                                                                            | Fokla Zorgdrager; Janke Schinkel; Marcel Jonges; Matthijs Welkers; Menno de Jong; Robin van Houdt; Sebastien Matamoros; Sjoerd Rebers                                                                                                                                                                                                                                                                                                                                                                                                                                                                                  |
| EPI_ISL_2925800, EPI_ISL_3673837                                                                    | Department of Medical Microbiology - section Molde, Molde Hospital                                                                                                                                        | Norwegian Institute of Public Health, Department of Virology                                                                                                                            | Atiya R Ali; Debech Nadia; Engebretsen Serina Beate; Garcia Llorente Ignacio; Hilde Elshaug; Hilde Vollan; Jon Bråte; Kamilla Heddeland Instefjord; Karoline Bragstad; Kathrine Stene-Johansen; Line Victoria Moen; Marie Paulsen Madsen; Olav Hungnes; Pedersen Benedikte Nevjen; Rasmus Riis Kopperud                                                                                                                                                                                                                                                                                                                |
| EPI_ISL_3162220                                                                                     | Department of Medical Microbiology, Hospital Pengajar Universiti Putra Malaysia                                                                                                                           | Malaysia Genome Institute                                                                                                                                                               | Avisha Richards; Azrin Ahmad; Enizza Kasim; Hui-Yee Chee; Irni Suhayu Sopian; Mohd Anuar Jonet; Mohd Faizal Abu Bakar; Mohd Noor Mat Isa; Muhammad MI; Narcisse Joseph; Nor Azfa Johari; Nor Zahrin Hasran; Nurhezreen Md Iqbal; Shamsidar Sopie; Siti Noraini Othman; Syafinaz Amin-Nordin; Yusuf Muhammad Noor                                                                                                                                                                                                                                                                                                       |
| EPI_ISL_2547429                                                                                     | Department of Medical Virology, School of Medicine Ahvaz Jundishapur University of Medical sciences                                                                                                       | Genetics Research Center, University of Social Welfare and Rehabilitation Sciences                                                                                                      | Ahmad Tavakoli; Azarakhsh Azaran; Farid yousefi; Hossein Najmabadi.; Kimia Kahrizi; Maryam Beheshtian; Marzieh Mohseni; Mohammad Farahmand; Mohsen Savaie; Seyed Mohammad Jazayeri; Zohreh Fattahi                                                                                                                                                                                                                                                                                                                                                                                                                     |
| EPI_ISL_3066150                                                                                     | Department of Microbiology                                                                                                                                                                                | Department of Microbiology                                                                                                                                                              | Paul K.S. Chan; Zigui Chen                                                                                                                                                                                                                                                                                                                                                                                                                                                                                                                                                                                             |
| EPI_ISL_2833647, see above                                                                          | EPI_ISL_2833648, EPI_ISL_2833653, EPI_ISL_2833655, EPI_ISL_2833661, EPI_ISL_2833664, EPI_ISL_2833665, EPI_ISL_3505785, EPI_ISL_3505791, EPI_ISL_3505796, EPI_ISL_3505803, EPI_ISL_3505804                 | Charité Universitätsmedizin Berlin, Institut für Virologie                                                                                                                              | Aferdita Hyseni; Barbara Mühlemann; Blendi Jerliu; Christian Drosten; Donjeta Hajdari; Julia Schneider; Jörn Beheim-Schwarzbach; Nazmi Mehmeti; Pranvera Abazi; Talitha Veith; Terry Jones; Victor M Corman; Xhevat Jakupi; Zana Deva                                                                                                                                                                                                                                                                                                                                                                                  |
| EPI_ISL_1027639, EPI_ISL_1027645                                                                    | Department of Microbiology, National Institute for Public Health of Kosovo                                                                                                                                | Charité Universitätsmedizin Berlin, Institut für Virologie                                                                                                                              | Barbara Mühlemann; Christian Drosten; Donjeta Hajdari; Julia Schneider; Jörn Beheim-Schwarzbach; Talitha Veith; Terry Jones; Victor M Corman; Xhevat Jakupi; Zana Deva                                                                                                                                                                                                                                                                                                                                                                                                                                                 |
| EPI_ISL_1034496                                                                                     | Department of Microbiology, The University of Hong Kong                                                                                                                                                   | Department of Microbiology, The University of Hong Kong                                                                                                                                 | Kelvin K.W. To; Kwok-Yung Yuen                                                                                                                                                                                                                                                                                                                                                                                                                                                                                                                                                                                         |
| EPI_ISL_2232960                                                                                     | Department of Microbiology, University Innsbruck                                                                                                                                                          | Berghaler laboratory, CeMM Research Center for Molecular Medicine of the Austrian Academy of Sciences                                                                                   | Andreas Berghaler; Anna Schedl; Bekir Erguner; Benedikt Agerer; Christoph Bock; Fabian Amman; Jan Laine; Lukas Endler; Maelle Le Moing; Martin Senekowitsch; Michael Schuster; Petr Triska; Thomas Penz                                                                                                                                                                                                                                                                                                                                                                                                                |
| EPI_ISL_463743, see above                                                                           | EPI_ISL_463746, EPI_ISL_1164628, EPI_ISL_1164640, EPI_ISL_1164679, EPI_ISL_1164746, EPI_ISL_1164749                                                                                                       | Department of Molecular Virology, Cyprus Institute of Neurology and Genetics                                                                                                            | Anastasis Oulas; Andreas Hadjisavvas; Christina Christodoulou; Christina Tryfonos; Dana Koptides; Denise Alexandrou; George Krashias; George Spyrou; Jan Richter; Maria Loizidou; Mihalís Panayiotidis; Olga Kalakouta; Pavlos Fanis; Stavros Bashiardes                                                                                                                                                                                                                                                                                                                                                               |
| EPI_ISL_853819                                                                                      | Department of Pathology, Landeskrankenhaus Graz II, Medical University Graz                                                                                                                               | Berghaler laboratory, CeMM Research Center for Molecular Medicine of the Austrian Academy of Sciences                                                                                   | Alexander Lercher; Alexandra Popa; Andreas Berghaler; Anna Schedl; Benedikt Agerer; Christoph Bock; Jakob-Wendelin Genger; Jan Laine; Lukas Endler; Martin Senekowitsch; Michael Schuster; Thomas Penz                                                                                                                                                                                                                                                                                                                                                                                                                 |
| EPI_ISL_417177                                                                                      | Department of Pathology, Princess Margaret Hospital                                                                                                                                                       | Department of Health Technology and Informatics, Faculty of Health and Social Science, The Hong Kong Polytechnic University                                                             | Alan Ka-Lun WU; Alex Yat-Man HO; Barry Kin-Chung WONG; David Ho-Keung SHUM; Eugene Yuk-Keung TSO; Gilman Kit-Hang SIU; Hui-Yin LAO; Kam-Tong Yip; Kenneth Siu-Sing LEUNG; Kingsley King-Gee TAM; Kit-Man SIN; Kitty Sau-Chun FUNG; Kwok-Cheung LUNG; Lam-Kwong LEE; Man-Chun CHAN; Ming-Pan CHOI; Miranda Chong-Yee YAU; Raymond Wai-To LIU; Sandy Ka-Yee CHAU; Shea Ping YIP; Tak-Lun Que; Timothy Ting-Leung NG; Wai-Shing LEUNG; Wing Cheong YAM; Wing-Kin TO; Yuk-Yung NG                                                                                                                                          |
| EPI_ISL_2692982                                                                                     | Department of Pathology, School of Medicine, Imam Hospital Complex, Tehran University of Medical Sciences, Tehran, Iran                                                                                   | Genetics Research Center, University of Social Welfare and Rehabilitation Sciences                                                                                                      | Ali Jafarpour; Alireza Abdollahi; Azam Ghaziasadi; Azar Hadadi; Hossein Najmabadi.; Khadijeh Jalalvand; Kimia Kahrizi; Marzieh Mohseni; Reza Najafipour; Saber Soltani; Seyed Mohammad Jazayeri; Seyedeh elham Mortazavi; Zohreh Fattahi                                                                                                                                                                                                                                                                                                                                                                               |
| EPI_ISL_2687994                                                                                     | Department of Public Health Bucharest                                                                                                                                                                     | National Institute of Infectious Diseases-Prof. Dr. Matei Bals Molecular Diagnostics Laboratory                                                                                         | Corina Casangiu; Dan Otelea; Leontina Banica; Marius Surleac; Petre Milu; Robert Hohan; Simona Paraschiv                                                                                                                                                                                                                                                                                                                                                                                                                                                                                                               |
| EPI_ISL_3045843                                                                                     | Department of Public Health Buzau                                                                                                                                                                         | National Institute of Infectious Diseases-Prof. Dr. Matei Bals Molecular Diagnostics Laboratory                                                                                         | Corina Casangiu; Dan Otelea; Leontina Banica; Marius Surleac; Petre Milu; Robert Hohan; Simona Paraschiv                                                                                                                                                                                                                                                                                                                                                                                                                                                                                                               |

|                                                                                                                                                                                                                                                                                                                                                                                                                                                                                                                                                                                                                                                                                                                                                                                                                                                                                                                                                                                                                                                                                                                                                                                                                                                                                                                                                                                                                                                                                                                                                                                                                                                                                                                                                                                                                                                                                                                                                                                                                                                                                                                                                     |                                                                                                                                         |                                                                                                                                                              |                                                                                                                                                                                                                                                                                                                                                                                                                                                                                                                                                                                                                                                                                                                                                                                                                                  |                                                                                                                                                                                                                                                                                                                                                                                                                                                                  |
|-----------------------------------------------------------------------------------------------------------------------------------------------------------------------------------------------------------------------------------------------------------------------------------------------------------------------------------------------------------------------------------------------------------------------------------------------------------------------------------------------------------------------------------------------------------------------------------------------------------------------------------------------------------------------------------------------------------------------------------------------------------------------------------------------------------------------------------------------------------------------------------------------------------------------------------------------------------------------------------------------------------------------------------------------------------------------------------------------------------------------------------------------------------------------------------------------------------------------------------------------------------------------------------------------------------------------------------------------------------------------------------------------------------------------------------------------------------------------------------------------------------------------------------------------------------------------------------------------------------------------------------------------------------------------------------------------------------------------------------------------------------------------------------------------------------------------------------------------------------------------------------------------------------------------------------------------------------------------------------------------------------------------------------------------------------------------------------------------------------------------------------------------------|-----------------------------------------------------------------------------------------------------------------------------------------|--------------------------------------------------------------------------------------------------------------------------------------------------------------|----------------------------------------------------------------------------------------------------------------------------------------------------------------------------------------------------------------------------------------------------------------------------------------------------------------------------------------------------------------------------------------------------------------------------------------------------------------------------------------------------------------------------------------------------------------------------------------------------------------------------------------------------------------------------------------------------------------------------------------------------------------------------------------------------------------------------------|------------------------------------------------------------------------------------------------------------------------------------------------------------------------------------------------------------------------------------------------------------------------------------------------------------------------------------------------------------------------------------------------------------------------------------------------------------------|
| EPI_ISL_3857079                                                                                                                                                                                                                                                                                                                                                                                                                                                                                                                                                                                                                                                                                                                                                                                                                                                                                                                                                                                                                                                                                                                                                                                                                                                                                                                                                                                                                                                                                                                                                                                                                                                                                                                                                                                                                                                                                                                                                                                                                                                                                                                                     | Department of Public Health Constanta                                                                                                   | National Institute of Infectious Diseases-Prof. Dr. Matei Bals Molecular Diagnostics Laboratory                                                              | Corina Casangiu; Dan Otelea; Leontina Banica; Marius Surleac; Ovidiu Vlaicu; Petre Milu; Robert Hohan; Simona Paraschiv                                                                                                                                                                                                                                                                                                                                                                                                                                                                                                                                                                                                                                                                                                          |                                                                                                                                                                                                                                                                                                                                                                                                                                                                  |
| EPI_ISL_3342031                                                                                                                                                                                                                                                                                                                                                                                                                                                                                                                                                                                                                                                                                                                                                                                                                                                                                                                                                                                                                                                                                                                                                                                                                                                                                                                                                                                                                                                                                                                                                                                                                                                                                                                                                                                                                                                                                                                                                                                                                                                                                                                                     | Department of Public Health Iasi                                                                                                        | National Institute of Infectious Diseases-Prof. Dr. Matei Bals Molecular Diagnostics Laboratory                                                              | Corina Casangiu; Dan Otelea; Leontina Banica; Marius Surleac; Ovidiu Vlaicu; Petre Milu; Robert Hohan; Simona Paraschiv                                                                                                                                                                                                                                                                                                                                                                                                                                                                                                                                                                                                                                                                                                          |                                                                                                                                                                                                                                                                                                                                                                                                                                                                  |
| EPI_ISL_2324621                                                                                                                                                                                                                                                                                                                                                                                                                                                                                                                                                                                                                                                                                                                                                                                                                                                                                                                                                                                                                                                                                                                                                                                                                                                                                                                                                                                                                                                                                                                                                                                                                                                                                                                                                                                                                                                                                                                                                                                                                                                                                                                                     | Department of Public Health Microbiology Ljubljana, National Laboratory for Health, Environment and Food                                | Department of Public Health Microbiology Ljubljana, National Laboratory for Health, Environment and Food                                                     | José Gonçalves; Katarina Prosenč; Marija Trkov; Martin Bosilj; Metka Paragi; Tom Koritnik; Verica Mioč                                                                                                                                                                                                                                                                                                                                                                                                                                                                                                                                                                                                                                                                                                                           |                                                                                                                                                                                                                                                                                                                                                                                                                                                                  |
| EPI_ISL_3386688                                                                                                                                                                                                                                                                                                                                                                                                                                                                                                                                                                                                                                                                                                                                                                                                                                                                                                                                                                                                                                                                                                                                                                                                                                                                                                                                                                                                                                                                                                                                                                                                                                                                                                                                                                                                                                                                                                                                                                                                                                                                                                                                     | Department of Public Health Suceava                                                                                                     | National Institute of Infectious Diseases-Prof. Dr. Matei Bals Molecular Diagnostics Laboratory                                                              | Corina Casangiu; Dan Otelea; Leontina Banica; Marius Surleac; Ovidiu Vlaicu; Petre Milu; Robert Hohan; Simona Paraschiv                                                                                                                                                                                                                                                                                                                                                                                                                                                                                                                                                                                                                                                                                                          |                                                                                                                                                                                                                                                                                                                                                                                                                                                                  |
| EPI_ISL_576147, EPI_ISL_576148                                                                                                                                                                                                                                                                                                                                                                                                                                                                                                                                                                                                                                                                                                                                                                                                                                                                                                                                                                                                                                                                                                                                                                                                                                                                                                                                                                                                                                                                                                                                                                                                                                                                                                                                                                                                                                                                                                                                                                                                                                                                                                                      | Department of Respiratory & Other Viral Infections of L.V. Gromashevsky Institute of Epidemiology & Infectious Diseases NAMS of Ukraine | Department of Respiratory & Other Viral Infections of L.V. Gromashevsky Institute of Epidemiology & Infectious Diseases NAMS of Ukraine, JSC "Farmak"        | Alla Mironenko; Ihor Kravchuk; Larysa Radchenko; Liudmyla Bolotova; Nataliia Teteriuk                                                                                                                                                                                                                                                                                                                                                                                                                                                                                                                                                                                                                                                                                                                                            |                                                                                                                                                                                                                                                                                                                                                                                                                                                                  |
| EPI_ISL_450200, EPI_ISL_1385800, EPI_ISL_1711672, EPI_ISL_1732172, EPI_ISL_2757749, EPI_ISL_3827533, EPI_ISL_3827545                                                                                                                                                                                                                                                                                                                                                                                                                                                                                                                                                                                                                                                                                                                                                                                                                                                                                                                                                                                                                                                                                                                                                                                                                                                                                                                                                                                                                                                                                                                                                                                                                                                                                                                                                                                                                                                                                                                                                                                                                                | see above                                                                                                                               | Department of Virology                                                                                                                                       |                                                                                                                                                                                                                                                                                                                                                                                                                                                                                                                                                                                                                                                                                                                                                                                                                                  |                                                                                                                                                                                                                                                                                                                                                                                                                                                                  |
| EPI_ISL_755975, EPI_ISL_756165, EPI_ISL_902877, EPI_ISL_1497156, EPI_ISL_2608827, EPI_ISL_3014554, EPI_ISL_3015014, EPI_ISL_3644543, EPI_ISL_3644734, EPI_ISL_3645103, EPI_ISL_3645153, EPI_ISL_3645226                                                                                                                                                                                                                                                                                                                                                                                                                                                                                                                                                                                                                                                                                                                                                                                                                                                                                                                                                                                                                                                                                                                                                                                                                                                                                                                                                                                                                                                                                                                                                                                                                                                                                                                                                                                                                                                                                                                                             | Department of Virology and Immunology, University of Helsinki and Helsinki University Hospital, HUSLAB Finland                          | Department of Virology, Faculty of Medicine, University of Helsinki, Helsinki, Finland                                                                       | Aamer Ikram; Abdul Ahad; Ackermann, N.; Adnan Haider; Ammar Amjad; Antwerpen, M.; Austin Leach; Bengs, K.; Berger, A.; Boehm, S.; Boehmer; Boender; Buchholz, U.; Cai, W.; Corman, D.V.; Dangel, A.; Drosten, C.; Eberle, U.; Fingler, V.; Grah, A.; Haas, W.; Hamouda, O.; Hoch, M.; Hoermansdorfer, S.; Ippisch, S.; Joel Montgomery; John Klena; Jones; Katz, K.; Ketan Patel; Konrad, R.; Liebl, B.; M.M.; Marosevic; Massab Umair; Melissa Mobley; Muehleman, B.; Muhammad Ammar; Muhammad Salman; Muller, N.; Nazish Badar; Poertner, K.; Protzer, U.; Qasim Ali; Reich, A.; Rexroth, U.; Sana Tamim; Schneider, J.; Shannon Whitmer; Sing, A.; Syed Adnan Haider; T.C.; T.S.; Treis, B.; V.M.; Veith, T.; Walter, M.; Wicklein, B.; Woelfel, R.; Woudenberg, T.; Zaira Rehman; Zapf, A.; Zeitlmann, N.; an der Heiden, M. |                                                                                                                                                                                                                                                                                                                                                                                                                                                                  |
| see above                                                                                                                                                                                                                                                                                                                                                                                                                                                                                                                                                                                                                                                                                                                                                                                                                                                                                                                                                                                                                                                                                                                                                                                                                                                                                                                                                                                                                                                                                                                                                                                                                                                                                                                                                                                                                                                                                                                                                                                                                                                                                                                                           | Department of Virology and Immunology, University of Helsinki and Helsinki University Hospital, HUSLAB Finland                          | Department of Virology, Faculty of Medicine, University of Helsinki, Helsinki, Finland                                                                       | Essi Korhonen; Hanna Jarva; Hanna Liimatainen; Hannimari Kallio-Kokko; Harri Kangas; Hussein Alburkat; Jenni Virtanen; Maija Lappalainen; Maija Suvanto; Olli Vapalahti; Pekka Ellonen; Phuoc Truong; Ravi Kant; Sari Hannula; Satu Kurkela; Teemu Smura                                                                                                                                                                                                                                                                                                                                                                                                                                                                                                                                                                         |                                                                                                                                                                                                                                                                                                                                                                                                                                                                  |
| EPI_ISL_2896259, EPI_ISL_2896261                                                                                                                                                                                                                                                                                                                                                                                                                                                                                                                                                                                                                                                                                                                                                                                                                                                                                                                                                                                                                                                                                                                                                                                                                                                                                                                                                                                                                                                                                                                                                                                                                                                                                                                                                                                                                                                                                                                                                                                                                                                                                                                    | Department of Virology, Molecular Biology and Genome Research                                                                           | Department of Virology, Molecular Biology and Genome Research                                                                                                | Kotaria, N.; Kotorashvili, A.; Murtskhvaladze, M.                                                                                                                                                                                                                                                                                                                                                                                                                                                                                                                                                                                                                                                                                                                                                                                |                                                                                                                                                                                                                                                                                                                                                                                                                                                                  |
| EPI_ISL_2301241                                                                                                                                                                                                                                                                                                                                                                                                                                                                                                                                                                                                                                                                                                                                                                                                                                                                                                                                                                                                                                                                                                                                                                                                                                                                                                                                                                                                                                                                                                                                                                                                                                                                                                                                                                                                                                                                                                                                                                                                                                                                                                                                     | Department of Virus and Microbiological Special Diagnostics, Statens Serum Institut, Copenhagen, Denmark                                | Aalborg University                                                                                                                                           | Danish Covid-19 Genome Consortium                                                                                                                                                                                                                                                                                                                                                                                                                                                                                                                                                                                                                                                                                                                                                                                                |                                                                                                                                                                                                                                                                                                                                                                                                                                                                  |
| EPI_ISL_818831                                                                                                                                                                                                                                                                                                                                                                                                                                                                                                                                                                                                                                                                                                                                                                                                                                                                                                                                                                                                                                                                                                                                                                                                                                                                                                                                                                                                                                                                                                                                                                                                                                                                                                                                                                                                                                                                                                                                                                                                                                                                                                                                      | Department of Virus and Microbiological Special Diagnostics, Statens Serum Institut, Copenhagen, Denmark                                | Albertsen Lab, Department of Chemistry and Bioscience, Aalborg University, Denmark                                                                           | Danish Covid-19 Genome Consortium                                                                                                                                                                                                                                                                                                                                                                                                                                                                                                                                                                                                                                                                                                                                                                                                |                                                                                                                                                                                                                                                                                                                                                                                                                                                                  |
| EPI_ISL_615736, EPI_ISL_615971, EPI_ISL_616111, EPI_ISL_622353                                                                                                                                                                                                                                                                                                                                                                                                                                                                                                                                                                                                                                                                                                                                                                                                                                                                                                                                                                                                                                                                                                                                                                                                                                                                                                                                                                                                                                                                                                                                                                                                                                                                                                                                                                                                                                                                                                                                                                                                                                                                                      | Department of Virus and Microbiological Special Diagnostics, Statens Serum Institut, Denmark                                            | Albertsen lab, Department of Chemistry and Bioscience, Aalborg University, Denmark                                                                           | Danish Covid-19 Genome Consortia                                                                                                                                                                                                                                                                                                                                                                                                                                                                                                                                                                                                                                                                                                                                                                                                 |                                                                                                                                                                                                                                                                                                                                                                                                                                                                  |
| EPI_ISL_416143                                                                                                                                                                                                                                                                                                                                                                                                                                                                                                                                                                                                                                                                                                                                                                                                                                                                                                                                                                                                                                                                                                                                                                                                                                                                                                                                                                                                                                                                                                                                                                                                                                                                                                                                                                                                                                                                                                                                                                                                                                                                                                                                      | Department of Virus and Microbiological Special diagnostics, Statens Serum Institut, Copenhagen, Denmark.                               | ViFU                                                                                                                                                         | Anders Fomsgaard; Maiken Worsøe Rosenstjerne; Morten Rasmussen                                                                                                                                                                                                                                                                                                                                                                                                                                                                                                                                                                                                                                                                                                                                                                   |                                                                                                                                                                                                                                                                                                                                                                                                                                                                  |
| EPI_ISL_3394968                                                                                                                                                                                                                                                                                                                                                                                                                                                                                                                                                                                                                                                                                                                                                                                                                                                                                                                                                                                                                                                                                                                                                                                                                                                                                                                                                                                                                                                                                                                                                                                                                                                                                                                                                                                                                                                                                                                                                                                                                                                                                                                                     | Dept. of Laboratory Medicine                                                                                                            | Dept. of Laboratory Medicine                                                                                                                                 | Anna Gschaider; Claudia Weber; Fabian König; Harald Esterbauer; Oswald Wagner; Petra Jurkowsitch; Robert Strassl; Sabina Plummer                                                                                                                                                                                                                                                                                                                                                                                                                                                                                                                                                                                                                                                                                                 |                                                                                                                                                                                                                                                                                                                                                                                                                                                                  |
| EPI_ISL_3542702                                                                                                                                                                                                                                                                                                                                                                                                                                                                                                                                                                                                                                                                                                                                                                                                                                                                                                                                                                                                                                                                                                                                                                                                                                                                                                                                                                                                                                                                                                                                                                                                                                                                                                                                                                                                                                                                                                                                                                                                                                                                                                                                     | Dept. of Medical Microbiology, Stavanger University Hospital, Helse Stavanger HF                                                        | Norwegian Institute of Public Health, Department of Virology                                                                                                 | Atiya R Ali; Debech Nadia; Engebretsen Serina Beate; Garcia Llorente Ignacio; Hilde Elshaug; Hilde Vollen; Jon Bråte; Kamilla Heddeland Instefjord; Karoline Bragstad; Kathrine Stene-Johansen; Line Victoria Moen; Marie Paulsen Madsen; Olav Hungenes; Pedersen Benedikte Nevjen; Rasmus Riis Kopperud                                                                                                                                                                                                                                                                                                                                                                                                                                                                                                                         |                                                                                                                                                                                                                                                                                                                                                                                                                                                                  |
| EPI_ISL_665259, EPI_ISL_2438754, EPI_ISL_3030519                                                                                                                                                                                                                                                                                                                                                                                                                                                                                                                                                                                                                                                                                                                                                                                                                                                                                                                                                                                                                                                                                                                                                                                                                                                                                                                                                                                                                                                                                                                                                                                                                                                                                                                                                                                                                                                                                                                                                                                                                                                                                                    | Dept. of Microbiology and Infection Control, Akershus University Hospital HF                                                            | Dept. of Microbiology and Infection Control, Akershus University Hospital HF                                                                                 | Alexander Hesselberg Løvestad; Hege Vangstein Aamot; Nina Handal; Ole Herman Ambur; Silje Bakken Jørgensen                                                                                                                                                                                                                                                                                                                                                                                                                                                                                                                                                                                                                                                                                                                       |                                                                                                                                                                                                                                                                                                                                                                                                                                                                  |
| EPI_ISL_2171041, EPI_ISL_3239839                                                                                                                                                                                                                                                                                                                                                                                                                                                                                                                                                                                                                                                                                                                                                                                                                                                                                                                                                                                                                                                                                                                                                                                                                                                                                                                                                                                                                                                                                                                                                                                                                                                                                                                                                                                                                                                                                                                                                                                                                                                                                                                    | Dhulikhel Hospital, Kathmandu University Hospital                                                                                       | Molecular and Genomics Research Lab, Dhulikhel Hospital, Kathmandu University Hospital                                                                       | Dipesh Tamrakar; Manu Vanaerschot; Meghnath Dhimai; Navin Adhikari; Nishan Katuwal; Pradip Gyanwali; Rajeev Shrestha; Saroj Bhattarai; Surendra Kumar Madhup                                                                                                                                                                                                                                                                                                                                                                                                                                                                                                                                                                                                                                                                     |                                                                                                                                                                                                                                                                                                                                                                                                                                                                  |
| EPI_ISL_3800765                                                                                                                                                                                                                                                                                                                                                                                                                                                                                                                                                                                                                                                                                                                                                                                                                                                                                                                                                                                                                                                                                                                                                                                                                                                                                                                                                                                                                                                                                                                                                                                                                                                                                                                                                                                                                                                                                                                                                                                                                                                                                                                                     | Diagnostyka. Laboratoria Medyczne.                                                                                                      | 1. ViroGenetics - BSL3 Laboratory of Virology, Malopolska Centre of Biotechnology, Jagiellonian University; 2. Diagnoston Laboratoria Łukasz Rąbalski        | Gromowski, T.; Kowalski, M.; Labaj; Maciej Kosinski; Mazur-Panasiuk, N.; Natalia Derewonko; P.P.; Pyrc, K.; Rabalski L.; Rogalska-Kupiec M.; Swadzba J.; Sylwia Januszczak; Szulc, P.; Wydmanski, W.                                                                                                                                                                                                                                                                                                                                                                                                                                                                                                                                                                                                                             |                                                                                                                                                                                                                                                                                                                                                                                                                                                                  |
| EPI_ISL_2319144                                                                                                                                                                                                                                                                                                                                                                                                                                                                                                                                                                                                                                                                                                                                                                                                                                                                                                                                                                                                                                                                                                                                                                                                                                                                                                                                                                                                                                                                                                                                                                                                                                                                                                                                                                                                                                                                                                                                                                                                                                                                                                                                     | Diagnostyka. Laboratoria Medyczne.                                                                                                      | 1. ViroGenetics - BSL3 Laboratory of Virology, Malopolska Centre of Biotechnology, Jagiellonian University; 2. genXone SA, Research & Development Laboratory | Brylak A; Dweska-Matelska N; Gidlewicz A; Grabowski J; Gromowski, T.; Januszczak S; Kaszuba M; Kowalski, M.; Krych L; Labaj; Mazur-Panasiuk, N.; Nowicki G; P.P.; Pyrc, K.; Sykulski M; Szeszko K; Szulc, P.; Wydmanski W.                                                                                                                                                                                                                                                                                                                                                                                                                                                                                                                                                                                                       |                                                                                                                                                                                                                                                                                                                                                                                                                                                                  |
| EPI_ISL_3050665, EPI_ISL_3372592, EPI_ISL_3372593, EPI_ISL_3372595, EPI_ISL_3372604                                                                                                                                                                                                                                                                                                                                                                                                                                                                                                                                                                                                                                                                                                                                                                                                                                                                                                                                                                                                                                                                                                                                                                                                                                                                                                                                                                                                                                                                                                                                                                                                                                                                                                                                                                                                                                                                                                                                                                                                                                                                 | Dirección regional de salud del Callao (DIRESA-CALLAO)                                                                                  | Centro de Investigaciones Tecnológicas, Biomédicas y Medioambientales (CITBM)                                                                                | B; Huaman; J. Alarcon; M. Cuellar; M. Ramirez; M. Sovero                                                                                                                                                                                                                                                                                                                                                                                                                                                                                                                                                                                                                                                                                                                                                                         |                                                                                                                                                                                                                                                                                                                                                                                                                                                                  |
| EPI_ISL_747356, EPI_ISL_760242, EPI_ISL_850403, EPI_ISL_1063648, EPI_ISL_1587549, EPI_ISL_2284658, EPI_ISL_2332354, EPI_ISL_2332355, EPI_ISL_2332464, EPI_ISL_2332520, EPI_ISL_2754661, EPI_ISL_2967328, EPI_ISL_3026048, EPI_ISL_3026566, EPI_ISL_3369227, EPI_ISL_3545218, EPI_ISL_3772919                                                                                                                                                                                                                                                                                                                                                                                                                                                                                                                                                                                                                                                                                                                                                                                                                                                                                                                                                                                                                                                                                                                                                                                                                                                                                                                                                                                                                                                                                                                                                                                                                                                                                                                                                                                                                                                        | see above                                                                                                                               | Division of Emerging Infectious Diseases, Bureau of Infectious Diseases Diagnosis Control and Prevention Agency                                              | Ae Kyung Park; Chae Young Lee; Chaeyoung Lee; Eun-Jin Kim; Heui Man Kim; Il-Hwan Kim; Jeong-Ah Kim; Jeong-Min Kim; Jin Sun No; Namjoo Lee; Sang Hee Woo                                                                                                                                                                                                                                                                                                                                                                                                                                                                                                                                                                                                                                                                          |                                                                                                                                                                                                                                                                                                                                                                                                                                                                  |
| EPI_ISL_2348803                                                                                                                                                                                                                                                                                                                                                                                                                                                                                                                                                                                                                                                                                                                                                                                                                                                                                                                                                                                                                                                                                                                                                                                                                                                                                                                                                                                                                                                                                                                                                                                                                                                                                                                                                                                                                                                                                                                                                                                                                                                                                                                                     | Division of Epidemiology                                                                                                                | COVID-19 Network Investigations (CONI) Alliance                                                                                                              | Angkana Huang; Anthony R. Jones; Arporn Wangwiwatsin; Arthicha Wongkumma; Bhakbhoon Panthan; Chonticha Klungtong; Duangkamon Loesbanluetchai; Ekawat Pasomsub; Elizabeth Batty; Insee Sensorn; Janjira Thaipadungpanit; Kawinna Kerdslahung; Khajohn Joonlasak; Kingkan Rakmanee; Krittikorn Kumpornsin; Namfon Kotanan; Pantila Taweewigyakarn; Prangsiiri Nalaem; Stefan Fernandez; Thanat Chookajorn; Theerarat Kochakarn; Treewat Watthanachockchai; Wasun Chantratita; Wudtichai Manasatienkij                                                                                                                                                                                                                                                                                                                              |                                                                                                                                                                                                                                                                                                                                                                                                                                                                  |
| EPI_ISL_3827662, EPI_ISL_3827702                                                                                                                                                                                                                                                                                                                                                                                                                                                                                                                                                                                                                                                                                                                                                                                                                                                                                                                                                                                                                                                                                                                                                                                                                                                                                                                                                                                                                                                                                                                                                                                                                                                                                                                                                                                                                                                                                                                                                                                                                                                                                                                    | Division of Medical Virology, National Health Laboratory Service (NHLS), Tygerberg Hospital / Stellenbosch University                   | CERI, Centre for Epidemic Response and Innovation, Stellenbosch University and CERI-KRISP, KZN Research Innovation and Sequencing Platform                   | Alvera Vorster; Bronwyn Kleinhangs; Carel J van Heerden; Gert van Zyl; Giandhari Jennifer; Kamela Mahlakwane; Karabo Phadu; Mathilda Claassen; Naidoo Yeshnee; Pillay Sureshnee; Ren Veikondis; San James; Shannon Wilson; Susan Engelbrecht; Tania Stander; Tegally Houriyah; Tongai Maponga; Tshiabula Derek; Wilkinson Eduan; Wolfgang Preiser; Yajna Rampahl; de Oliveira Tulio                                                                                                                                                                                                                                                                                                                                                                                                                                              |                                                                                                                                                                                                                                                                                                                                                                                                                                                                  |
| EPI_ISL_3666165                                                                                                                                                                                                                                                                                                                                                                                                                                                                                                                                                                                                                                                                                                                                                                                                                                                                                                                                                                                                                                                                                                                                                                                                                                                                                                                                                                                                                                                                                                                                                                                                                                                                                                                                                                                                                                                                                                                                                                                                                                                                                                                                     | Division of Medical Virology, National Health Laboratory Service (NHLS), Tygerberg Hospital / Stellenbosch University                   | Division of Medical Virology, National Health Laboratory Service (NHLS), Tygerberg Hospital / Stellenbosch University                                        | Bronwyn Kleinhangs; Gert van Zyl; Kamela Mahlakwane; Shannon Wilson; Susan Engelbrecht; Tongai Maponga; Wolfgang Preiser                                                                                                                                                                                                                                                                                                                                                                                                                                                                                                                                                                                                                                                                                                         |                                                                                                                                                                                                                                                                                                                                                                                                                                                                  |
| EPI_ISL_3068079, EPI_ISL_3068086                                                                                                                                                                                                                                                                                                                                                                                                                                                                                                                                                                                                                                                                                                                                                                                                                                                                                                                                                                                                                                                                                                                                                                                                                                                                                                                                                                                                                                                                                                                                                                                                                                                                                                                                                                                                                                                                                                                                                                                                                                                                                                                    | Division of Medical Virology, National Health Laboratory Service (NHLS), Tygerberg Hospital / Stellenbosch University                   | Division of Medical Virology, Stellenbosch University and NHLS Tygerberg Hospital                                                                            | Bronwyn Kleinhangs; Gert van Zyl; Kayla Delaney; Susan Engelbrecht; Wolfgang Preiser                                                                                                                                                                                                                                                                                                                                                                                                                                                                                                                                                                                                                                                                                                                                             |                                                                                                                                                                                                                                                                                                                                                                                                                                                                  |
| EPI_ISL_412871, EPI_ISL_498004, EPI_ISL_498013, EPI_ISL_510580, EPI_ISL_514925                                                                                                                                                                                                                                                                                                                                                                                                                                                                                                                                                                                                                                                                                                                                                                                                                                                                                                                                                                                                                                                                                                                                                                                                                                                                                                                                                                                                                                                                                                                                                                                                                                                                                                                                                                                                                                                                                                                                                                                                                                                                      | Division of Viral Diseases, Center for Laboratory Control of Infectious Diseases, Korea Centers for Diseases Control and Prevention     | Division of Viral Diseases, Center for Laboratory Control of Infectious Diseases, Korea Centers for Diseases Control and Prevention                          | Daesang Lee; Dong Hyun Song; Heui Man Kim; Hye-Jun Jo; Jeong-Min Kim; Jun-Sub Kim; Mi-Seon Kim; Myung Guk Han; Namjoo Lee; Sang Hee Woo; Sehee Park; Seong Tae Jeong; Yoon-Seok Chung                                                                                                                                                                                                                                                                                                                                                                                                                                                                                                                                                                                                                                            |                                                                                                                                                                                                                                                                                                                                                                                                                                                                  |
| EPI_ISL_2724045                                                                                                                                                                                                                                                                                                                                                                                                                                                                                                                                                                                                                                                                                                                                                                                                                                                                                                                                                                                                                                                                                                                                                                                                                                                                                                                                                                                                                                                                                                                                                                                                                                                                                                                                                                                                                                                                                                                                                                                                                                                                                                                                     | Dr S raju, Director of public health and preventive medicine                                                                            | inStem NCBS - INSACOG                                                                                                                                        | Uma Ramakrishnan Dasaradhi Palakodeti Aswin SaiNarain                                                                                                                                                                                                                                                                                                                                                                                                                                                                                                                                                                                                                                                                                                                                                                            |                                                                                                                                                                                                                                                                                                                                                                                                                                                                  |
| EPI_ISL_3388900, EPI_ISL_3570031, EPI_ISL_3570032, EPI_ISL_3570034, EPI_ISL_3570055, EPI_ISL_3578112, EPI_ISL_3578139, EPI_ISL_3578161, EPI_ISL_3578188, EPI_ISL_3635701, EPI_ISL_3798358                                                                                                                                                                                                                                                                                                                                                                                                                                                                                                                                                                                                                                                                                                                                                                                                                                                                                                                                                                                                                                                                                                                                                                                                                                                                                                                                                                                                                                                                                                                                                                                                                                                                                                                                                                                                                                                                                                                                                           | see above                                                                                                                               | Dr. Risch Ostschweiz AG                                                                                                                                      | Dominique Fabien Hilti; Faina Wehrli; Lorenz Risch; Martin Risch; Nadia Wohlwend; Sinem Kas; Thomas Bodmer                                                                                                                                                                                                                                                                                                                                                                                                                                                                                                                                                                                                                                                                                                                       |                                                                                                                                                                                                                                                                                                                                                                                                                                                                  |
| EPI_ISL_417212                                                                                                                                                                                                                                                                                                                                                                                                                                                                                                                                                                                                                                                                                                                                                                                                                                                                                                                                                                                                                                                                                                                                                                                                                                                                                                                                                                                                                                                                                                                                                                                                                                                                                                                                                                                                                                                                                                                                                                                                                                                                                                                                      | Dunedin Hospital                                                                                                                        | Microbiology, Dr. Risch University of Otago                                                                                                                  | B. Lawley; J. Grant; J. Ussher; M.E. Quiñones-Mateu; R. Harfoot                                                                                                                                                                                                                                                                                                                                                                                                                                                                                                                                                                                                                                                                                                                                                                  |                                                                                                                                                                                                                                                                                                                                                                                                                                                                  |
| EPI_ISL_460805, EPI_ISL_523164, EPI_ISL_2145740                                                                                                                                                                                                                                                                                                                                                                                                                                                                                                                                                                                                                                                                                                                                                                                                                                                                                                                                                                                                                                                                                                                                                                                                                                                                                                                                                                                                                                                                                                                                                                                                                                                                                                                                                                                                                                                                                                                                                                                                                                                                                                     | Dutch COVID-19 response team                                                                                                            | Erasmus Medical Center                                                                                                                                       | Anne van der Linden; Annemiek van der Eijk; Aura Timen; Bas Oude Munnink; Claudia Schapendonk; Corien Swaan; Corine GeurtsvanKessel; David Nieuwenhuijse; Emmanuelle Munger; Irina Chestakova; Jeroen van Kampen; Jolanda Voermans; Madelief Molliers; Manon Haverkate; Marion Koopmans; Marjan Boter; Mark Pronk; Mart Stein; Pascal Lexmond; Reina Sikkema; Richard Molenkamp; Sandra Kengne Kanga Mobou; Stefan van Nieuwkoop; Theo Bestebroer; on behalf of the national COVID-19 respo; on behalf of the Dutch national COVID-19 response team.                                                                                                                                                                                                                                                                             |                                                                                                                                                                                                                                                                                                                                                                                                                                                                  |
| EPI_ISL_547446, EPI_ISL_547451, EPI_ISL_636515, EPI_ISL_636519, EPI_ISL_723233, EPI_ISL_728677, EPI_ISL_1014561, EPI_ISL_1014567, EPI_ISL_1014576, EPI_ISL_1014585, EPI_ISL_1014666, EPI_ISL_1089780, EPI_ISL_1165619, EPI_ISL_1233007, EPI_ISL_1288132, EPI_ISL_1288133, EPI_ISL_1370872, EPI_ISL_1371268, EPI_ISL_1457573, EPI_ISL_1522182, EPI_ISL_1522202, EPI_ISL_1705301, EPI_ISL_19631912, EPI_ISL_2093403, EPI_ISL_2093435, EPI_ISL_2093442, EPI_ISL_2093657, EPI_ISL_2093754, EPI_ISL_2093769, EPI_ISL_2093769, EPI_ISL_2094342, EPI_ISL_2094345, EPI_ISL_2094347, EPI_ISL_2217866, EPI_ISL_2218097, EPI_ISL_2218273, EPI_ISL_2220430, EPI_ISL_2302857, EPI_ISL_2303447, EPI_ISL_2303450, EPI_ISL_2303978, EPI_ISL_2405481, EPI_ISL_2405550, EPI_ISL_2405589, EPI_ISL_2405608, EPI_ISL_2405689, EPI_ISL_2406317, EPI_ISL_2474832, EPI_ISL_2475386, EPI_ISL_2475681, EPI_ISL_2476284, EPI_ISL_2610658, EPI_ISL_2673213, EPI_ISL_2673225, EPI_ISL_2673252, EPI_ISL_2673270, EPI_ISL_2787142, EPI_ISL_2787322, EPI_ISL_2787813, EPI_ISL_2787946, EPI_ISL_2787992, EPI_ISL_2788182, EPI_ISL_2788186, EPI_ISL_2788368, EPI_ISL_2862718, EPI_ISL_2862790, EPI_ISL_2862792, EPI_ISL_2862796, EPI_ISL_2981892, EPI_ISL_2981897, EPI_ISL_2981900, EPI_ISL_2981901, EPI_ISL_3056793, EPI_ISL_3057212, EPI_ISL_3058076, EPI_ISL_3136562, EPI_ISL_3136572, EPI_ISL_3136605, EPI_ISL_3136624, EPI_ISL_3137106, EPI_ISL_3138367, EPI_ISL_3138394, EPI_ISL_3138405, EPI_ISL_3253259, EPI_ISL_3257963, EPI_ISL_3257978, EPI_ISL_3259189, EPI_ISL_3389278, EPI_ISL_3389741, EPI_ISL_3389772, EPI_ISL_3389776, EPI_ISL_3389781, EPI_ISL_3390570, EPI_ISL_3390704, EPI_ISL_3390705, EPI_ISL_3731397, EPI_ISL_3731651, EPI_ISL_3731770, EPI_ISL_3731802, EPI_ISL_3732335, EPI_ISL_3732369, EPI_ISL_3732378, EPI_ISL_3732380, EPI_ISL_3732390, EPI_ISL_3732391, EPI_ISL_3732432, EPI_ISL_3732848, EPI_ISL_3732904, EPI_ISL_3732925, EPI_ISL_3732926, EPI_ISL_3732934, EPI_ISL_3732935, EPI_ISL_3732942, EPI_ISL_3732962, EPI_ISL_3732965, EPI_ISL_3732966, EPI_ISL_3733698, EPI_ISL_3733731, EPI_ISL_3733853, EPI_ISL_3733872, EPI_ISL_3737183, EPI_ISL_3771759 | see above                                                                                                                               | Dutch COVID-19 response team                                                                                                                                 | National Institute for Public Health and the Environment (RIVM)                                                                                                                                                                                                                                                                                                                                                                                                                                                                                                                                                                                                                                                                                                                                                                  | Adam Meijer; AnneMarie van den Brandt; Annelies Kroneman; Bas van der Veer; Chantal Reusken; Dennis Schmitz; Dirk Egink; Eunice Then; Florian Zwagemaker; Harry Vennema; James Groot; Jeroen Cremer; Jolienke Hardeman; Karim Hajji; Kim Freriks; Linda van de Nes; Lisa Wijsman; Lynn Aarts; Melissa van Tuil; Robert Kohl; Rianne Jaarsma; Sanne Bos; Sharon van den Brink; Sjoerd Kulling; Stijn van Rossum; on behalf of the national COVID-19 response team |



|                                                                                                                                                                                                                                                                                                                                                                                                                                                                                                                                                                                                                |                                                                                                                                                                          |                                                                                                                                                                                                                            |                                                                                                                                                                                                                                                                                                                                                                                                                                                                                          |
|----------------------------------------------------------------------------------------------------------------------------------------------------------------------------------------------------------------------------------------------------------------------------------------------------------------------------------------------------------------------------------------------------------------------------------------------------------------------------------------------------------------------------------------------------------------------------------------------------------------|--------------------------------------------------------------------------------------------------------------------------------------------------------------------------|----------------------------------------------------------------------------------------------------------------------------------------------------------------------------------------------------------------------------|------------------------------------------------------------------------------------------------------------------------------------------------------------------------------------------------------------------------------------------------------------------------------------------------------------------------------------------------------------------------------------------------------------------------------------------------------------------------------------------|
| EPI_ISL_1137609                                                                                                                                                                                                                                                                                                                                                                                                                                                                                                                                                                                                | Département de Maladies Infectieuses, CHU Farhat Hached Sousse, Tunisie                                                                                                  | Laboratoire des Procédés de Criblage Moléculaire et Cellulaire-Centre de Biotechnologie de Sfax                                                                                                                            | A. and Masmoudi, S.; Abdelmoulah, F.; Abid, M.; Abid, N.; Ajili, F.; Aouni, M.; Ben Ayed, I.; Bensaid, M.; Chawech, H.; Chtourou, A.; Elargoubi, A.; Fki-berrajah, L.; Gaaloul, I.; Gargouri, S.; Hammami, A.; Kamoun, S.; Karray Hakim, H.; Kharat, N.; Letaief, A.; Mastouri, M.; Mhalla, S.; Nabil, A.; Rebai, Smeti, I.; Souissi, A.; Stambouli, N.; Turki, M.                                                                                                                       |
| EPI_ISL_450518, EPI_ISL_501275, EPI_ISL_501829                                                                                                                                                                                                                                                                                                                                                                                                                                                                                                                                                                 | E. Gulbja Laboratorija                                                                                                                                                   | Latvian Biomedical Research and Study Centre                                                                                                                                                                               | Dmitrijs Perminovs; Ivars Silamikelis; Jānis Klovins; Kaspars Megnis; Mikus Gavars; Monta Ustinova; Uga Dumpis; Vita Rovite; Nikita Zreløvs                                                                                                                                                                                                                                                                                                                                              |
| EPI_ISL_1312490                                                                                                                                                                                                                                                                                                                                                                                                                                                                                                                                                                                                | E. Gulbja laboratorija                                                                                                                                                   | Latvian Biomedical Research and Study Centre                                                                                                                                                                               | Davids Fridmanis; Dmitrijs Perminovs; Guntars Zarins; Ivars Silamikelis; Janis Klovins; Janis Pjalkovskis; Juris Perevoscikovs; Kaspars Megnis; Laila Silamikele; Lauma Freimane; Laura Ansonse; Liga Birzniec; Mikus Gavars; Monta Ustinova; Nikita Zreløvs; Uga Dumpis; Una Krumina; Vita Rovite                                                                                                                                                                                       |
| EPI_ISL_3838369                                                                                                                                                                                                                                                                                                                                                                                                                                                                                                                                                                                                | EAST LONDON LABORATORY                                                                                                                                                   | National Institute for Communicable Diseases of the National Health Laboratory Service                                                                                                                                     | Amoako DG; Bhiman JN; Everatt J; Ismail A; Mahlangu B; Mnguni A; Mohale T; Ntuli N; Scheepers C                                                                                                                                                                                                                                                                                                                                                                                          |
| EPI_ISL_3259913                                                                                                                                                                                                                                                                                                                                                                                                                                                                                                                                                                                                | EHNV                                                                                                                                                                     | Laboratory of genomics and metagenomics                                                                                                                                                                                    | Claire Bertelli; Damien Jacot; Gilbert Greub; Sébastien Aeby; Trestan Pillonel                                                                                                                                                                                                                                                                                                                                                                                                           |
| EPI_ISL_2370352, EPI_ISL_2370859                                                                                                                                                                                                                                                                                                                                                                                                                                                                                                                                                                               | ETHNIKO KENTRO AIMODOSIAS E.KE.A.                                                                                                                                        | Greek Genome Center, Biomedical Research Foundation of the Academy of Athens (BRFAA)                                                                                                                                       | Dimitrios Thanos; Efthimia Petinaki; Emmanouil Athanasiadis; Giannis Vatsellas; Katerina Zoi; Kostas Stamoulis; Theodoros Loupis                                                                                                                                                                                                                                                                                                                                                         |
| EPI_ISL_593531                                                                                                                                                                                                                                                                                                                                                                                                                                                                                                                                                                                                 | Eastern Ontario Regional Laboratory Association                                                                                                                          | McMaster University                                                                                                                                                                                                        | Ahmed Draia; Andrew G. McArthur; Emily Panousis; Hooman Derakhshani; Jalees Nasir; Leanne Mortimer; Robert Slinger                                                                                                                                                                                                                                                                                                                                                                       |
| EPI_ISL_2478881, EPI_ISL_2479300, EPI_ISL_3116423, EPI_ISL_3524202, EPI_ISL_3525416                                                                                                                                                                                                                                                                                                                                                                                                                                                                                                                            | Edmonton Provincial Lab                                                                                                                                                  | Public Health Agency of Canada (PHAC) National Microbiology Laboratory                                                                                                                                                     | Buss; Croxen M; Deo A; Dieu P; E; Ferrato C; Gill K; Khan F; Koleva P; Li V; Lloyd C; Lynch T; Ma R; Murphy S; Pabbaraju K; Shokoples S; Thayer J; Tipples G; Whitehouse M; Wong A; Yu C; Zelyas N                                                                                                                                                                                                                                                                                       |
| EPI_ISL_2029260                                                                                                                                                                                                                                                                                                                                                                                                                                                                                                                                                                                                | Ekstralab Tuzla                                                                                                                                                          | Alea Genetic Centre                                                                                                                                                                                                        | Adis Kandic; Dino Pecar; Enis Kandic; Lana Salihfendic; Nusret Butkovic; Rijad Konjhodzic                                                                                                                                                                                                                                                                                                                                                                                                |
| EPI_ISL_3655288                                                                                                                                                                                                                                                                                                                                                                                                                                                                                                                                                                                                | Elisabeth Pharmacon                                                                                                                                                      | University Hospital Brno, CMBG                                                                                                                                                                                             | Jan Svaton; Kristyna Dufkova; Martina Lengerova; Matej Bezdicek; Pavlina Volfova                                                                                                                                                                                                                                                                                                                                                                                                         |
| EPI_ISL_2932514                                                                                                                                                                                                                                                                                                                                                                                                                                                                                                                                                                                                | Emergency County Hospital Targu Mures                                                                                                                                    | National Institute of Infectious Diseases-Prof. Dr. Matei Bals Molecular Diagnostics Laboratory                                                                                                                            | Corina Casangiu; Dan Otelea; Leontina Banica; Marius Surleac; Petre Milu; Robert Hohan; Simona Paraschiv                                                                                                                                                                                                                                                                                                                                                                                 |
| EPI_ISL_1122017                                                                                                                                                                                                                                                                                                                                                                                                                                                                                                                                                                                                | Emergency department of COVID-19, Beijing Ditan Hospital, Capital Medical University, Beijing, China.                                                                    | National Institute for Viral Disease Control and Prevention                                                                                                                                                                | 3*; Di Tian1; Gang Liu1; Gang Wan1; Jianbo Tan1; Long Liu1; Pan Xiang1; Shuangli Zhu2; Shuping Cui1; Tingyu Zhang1; Wei Zhang1#; Wenbo Xu2# and Zhihai Chen1#; Xianbo Wang1; Xiang Zhao2; Yang Song2*; Yanhai Wang2; Yanli Xu1; Yu Wang1; Ziruo Ge1*                                                                                                                                                                                                                                     |
| EPI_ISL_1897884, EPI_ISL_1898554, EPI_ISL_2241623                                                                                                                                                                                                                                                                                                                                                                                                                                                                                                                                                              | Ethiopian Biotechnology Institute (EBTI)                                                                                                                                 | International Centre for Genetic Engineering and Biotechnology (ICGEB) and ARGO Open Lab for Genome Sequencing                                                                                                             | Alessandro Marcello; Danilo Licastro; Emanuele Orsini; Getnet Hailu; Hailu Dadi; Kassahun Tesfaye; Keyru Tuki; Kominist Asmamaw; Molalegne Bitew; Simeone Dal Monego; Yakob Gebregziabher Tsegay                                                                                                                                                                                                                                                                                         |
| EPI_ISL_2844313                                                                                                                                                                                                                                                                                                                                                                                                                                                                                                                                                                                                | Europe/Sweden/Vastragotland/Unilabs                                                                                                                                      | Unilabs/Eskilstuna/Sweden                                                                                                                                                                                                  | Emma Arvidsson                                                                                                                                                                                                                                                                                                                                                                                                                                                                           |
| EPI_ISL_1712253                                                                                                                                                                                                                                                                                                                                                                                                                                                                                                                                                                                                | FSBI «NATIONAL MEDICAL RESEARCH CENTER FOR OBSTETRICS, GYNECOLOGY AND PERINATOLOGY NAMED AFTER ACADEMICIAN V.I.KULAKOV» MINISTRY OF HEALTHCARE OF THE RUSSIAN FEDERATION | Center for Precision Genome Editing and Genetic Technologies for Biomedicine, Pirogov Medical University, Moscow, Russian Federation                                                                                       | Anastasia Shut; Andrey Krivoy; Dmitriy Korostin; Margarita Korzhanova; Vera Belova; Yegor Botsmanov                                                                                                                                                                                                                                                                                                                                                                                      |
| EPI_ISL_3398808                                                                                                                                                                                                                                                                                                                                                                                                                                                                                                                                                                                                | FUNDACION CARDIOVASCULAR DE COLOMBIA                                                                                                                                     | Instituto Nacional de Salud                                                                                                                                                                                                | Carlos Franco-Muñoz; Carmen Osorio; Diana Malo; Diego A. Álvarez-Díaz; Diego Andrés Prada; Gerardo Santamaría; Hector Alejandro Ruiz-Moreno; Jhonatan Reales-González; Jorge Rivera; Juan Camilo Martínez; Julian Naizaque; Katherine Laiton-Donato; Lisseth Pardo; Magdalena Wiesner; Marcela Mercado-Reyes; Maria T.Herrera-Sepúlveda; Marta Lopez Blanco; Martha Lucia Ospina Martínez; Paola Rojas; Sergio Gomez; Sheryll Corchuelo; Ángela Alarcon Cruz                             |
| EPI_ISL_3066769, EPI_ISL_3459379                                                                                                                                                                                                                                                                                                                                                                                                                                                                                                                                                                               | FUNDACION VALLE DE LILI                                                                                                                                                  | Instituto Nacional de Salud                                                                                                                                                                                                | Carlos Franco-Muñoz; Carmen Osorio; Diana Malo; Diego A. Álvarez-Díaz; Diego Andrés Prada; Gerardo Santamaría; Hector Alejandro Ruiz-Moreno; Jhonatan Reales-González; Jorge Rivera; Juan Camilo Martínez; Julian Naizaque; Katherine Laiton-Donato; Lisseth Pardo; Magdalena Wiesner; Marcela Mercado-Reyes; Maria T. Herrera-Sepúlveda; Maria T.Herrera-Sepúlveda; Marta Lopez Blanco; Martha Lucia Ospina Martínez; Paola Rojas; Sergio Gomez; Sheryll Corchuelo; Ángela Alarcon Cruz |
| EPI_ISL_804016                                                                                                                                                                                                                                                                                                                                                                                                                                                                                                                                                                                                 | Facultad de Medicina, Universidad de Atacama                                                                                                                             | Facultad de Ciencias de la Vida, UNAB                                                                                                                                                                                      | Claudio Meneses; César Echeverría; Dayán Sanhueza; Eduardo Castro; Jorge Olivares; Macarena Bastías; Sebastián Wolter; Waldo Díaz                                                                                                                                                                                                                                                                                                                                                        |
| EPI_ISL_1273101                                                                                                                                                                                                                                                                                                                                                                                                                                                                                                                                                                                                | Faculty of Medicine, Al-Quds University                                                                                                                                  | Faculty of Medicine, Al-Quds University                                                                                                                                                                                    | Al-Jawabreh, A.; Dumaidi, K.; Ereqat, S.; Nasereddin, A.                                                                                                                                                                                                                                                                                                                                                                                                                                 |
| EPI_ISL_3020619, EPI_ISL_3020842, EPI_ISL_3020943                                                                                                                                                                                                                                                                                                                                                                                                                                                                                                                                                              | Fimlab Laboratoriot Oy Tampere                                                                                                                                           | Expert Microbiology, National Institute for Health and Welfare                                                                                                                                                             | Carita Savolainen-Kopra; Erika Lindh; Haider al-Hello; Jani Halkilahti; Kirsi Liitsola; Niina Ikonen; Olli Vapalahti; Pekka Ellonen; Phuoc Truong; Päivi Laurila; Ravi Kant; Sari Hannula; Soile Blomqvist; Teemu Smura                                                                                                                                                                                                                                                                  |
| EPI_ISL_594319                                                                                                                                                                                                                                                                                                                                                                                                                                                                                                                                                                                                 | Florida Bureau of Public Health Laboratories                                                                                                                             | Florida Bureau of Public Health Laboratories                                                                                                                                                                               | Jason Blanton; Sarah Schmedes                                                                                                                                                                                                                                                                                                                                                                                                                                                            |
| EPI_ISL_2889836, EPI_ISL_2889841, EPI_ISL_2889844                                                                                                                                                                                                                                                                                                                                                                                                                                                                                                                                                              | Fondation Congolaise pour la recherche medicale (FCRM)                                                                                                                   | Fondation Congolaise pour la Recherche Médicale                                                                                                                                                                            | Abel Lissom; Batchi-Bouyou Armel Landry; Francine Ntoumi; Jean Claude Djontu; Mfoutou Mapanguy Claujens Chastel; Thirumalaisamy P. Velavan                                                                                                                                                                                                                                                                                                                                               |
| EPI_ISL_3040125, EPI_ISL_3040126, EPI_ISL_3040131, EPI_ISL_3040134, EPI_ISL_3040136                                                                                                                                                                                                                                                                                                                                                                                                                                                                                                                            | Fondation Congolaise pour la recherche medicale (FCRM), Francine Ntoumi                                                                                                  | Fondation Congolaise pour la Recherche Médicale                                                                                                                                                                            | Batchi-Bouyou Armel Landry; Dr. Abel Lissom; Dr. Jean Claude Djontu; Mfoutou Mapanguy Claujens Chastel; Prof. Dr. Thirumalaisamy P. Velavan; Prof. Francine Ntoumi                                                                                                                                                                                                                                                                                                                       |
| EPI_ISL_1671929, EPI_ISL_1671930                                                                                                                                                                                                                                                                                                                                                                                                                                                                                                                                                                               | Fondation Congolaise pour la recherche medicale (FCRM), Francine Ntoumi                                                                                                  | Institute of Tropical Medicine                                                                                                                                                                                             | Prof. Dr. Thirumalaisamy P. Velavan and Prof. Francine Ntoumi                                                                                                                                                                                                                                                                                                                                                                                                                            |
| EPI_ISL_912387                                                                                                                                                                                                                                                                                                                                                                                                                                                                                                                                                                                                 | Fondation Congolaise pour la recherche medicale (FCRM), Francine Ntoumi                                                                                                  | NGS Competence Center Tuebingen, Institut für Medizinische Mikrobiologie und Hygiene, Universitaetsklinikum Tübingen                                                                                                       | Angel Angelov                                                                                                                                                                                                                                                                                                                                                                                                                                                                            |
| EPI_ISL_3006797                                                                                                                                                                                                                                                                                                                                                                                                                                                                                                                                                                                                | Fujian Center for Disease Control and Prevention                                                                                                                         | Fujian Center for Disease Control and Prevention                                                                                                                                                                           | Huang Zhimiao; Lin Qi; Weng Yuwei                                                                                                                                                                                                                                                                                                                                                                                                                                                        |
| EPI_ISL_1555799, EPI_ISL_1839632, EPI_ISL_1993055, EPI_ISL_2179869, EPI_ISL_3208946, EPI_ISL_3350475, EPI_ISL_3352391, EPI_ISL_3523878, EPI_ISL_3661476                                                                                                                                                                                                                                                                                                                                                                                                                                                        | see above                                                                                                                                                                | Fulgent Genetics                                                                                                                                                                                                           | Centers for Disease Control and Prevention Division of Viral Diseases, Pathogen Discovery                                                                                                                                                                                                                                                                                                                                                                                                |
| EPI_ISL_812176                                                                                                                                                                                                                                                                                                                                                                                                                                                                                                                                                                                                 | GA Department of Public Health Laboratory                                                                                                                                | Pathogen Discovery, Respiratory Viruses Branch, Division of Viral Diseases, Centers for Disease Control and Prevention                                                                                                     | Adrian Paskey; Becky Tsai; Benafsh Sapra; Benjamin Rambo-Martin; Christopher Gulvick; Clinton Paden; Clinton R. Paden; Dakota Howard; Darlene Wagner; Dhvani Batra; Doreen Ng; Duncan MacCannell; Harry Gao; James Xie; Jason Caravas; John Gao; Joseph Fierro; Kara Moser; Matthew Schmeer; Mickey Li; Peter Cook; Peter W. Cook; Scott Sammons; Shatavia Morrison; Yan Meng; Yvette Unoaumhi                                                                                           |
| EPI_ISL_730577                                                                                                                                                                                                                                                                                                                                                                                                                                                                                                                                                                                                 | Gazi University Faculty of Medicine, Medical Virology Laboratory                                                                                                         | Gazi University Faculty of Medicine, Medical Virology Laboratory                                                                                                                                                           | Anna Montmayeur; Anna Uehara; Brian Lynch; Clinton R. Paden; Haibin Wang; Jing Zhang; Krista Queen; Peter Cook; Rachel Marine; Suxiang Tong; Yan Li; Ying Tao                                                                                                                                                                                                                                                                                                                            |
| EPI_ISL_3026020                                                                                                                                                                                                                                                                                                                                                                                                                                                                                                                                                                                                | Geelong Centre for Emerging Infectious Diseases, Deakin University                                                                                                       | Geelong Centre for Emerging Infectious Diseases, Deakin University                                                                                                                                                         | Erdem Şahin; Gülemdam Bozday; Hager Muftah; İşil Fidan; Kayhan Çağlar; Murat Dizbay; Selin Yiğit; Shaknoza Sarzhanova; Özlem Güzel Tunççan                                                                                                                                                                                                                                                                                                                                               |
| EPI_ISL_3491807                                                                                                                                                                                                                                                                                                                                                                                                                                                                                                                                                                                                | Gencore - Universidad de los Andes                                                                                                                                       | Gencore - Universidad de los Andes                                                                                                                                                                                         | Alexandersen, S.; Bhatta; Chamings, A.; T.R.                                                                                                                                                                                                                                                                                                                                                                                                                                             |
| EPI_ISL_467300                                                                                                                                                                                                                                                                                                                                                                                                                                                                                                                                                                                                 | General Hospital "Abdulah Nakas"                                                                                                                                         | Alea Genetic Center                                                                                                                                                                                                        | Catherine Jaller; Cristian Barrera; David González; Luisa Sacristan; Marcela Guevara; Silvia Restrepo                                                                                                                                                                                                                                                                                                                                                                                    |
| EPI_ISL_2029122                                                                                                                                                                                                                                                                                                                                                                                                                                                                                                                                                                                                | General Hospital "Abdulah Nakas"                                                                                                                                         | Alea Genetic Centre                                                                                                                                                                                                        | Damir Marjanovic; Dino Pecar; Enis Kandic; Lana Salihfendic; Nihad Fejzic; Rijad Konjhodzic; Sead Jazic; Teufik Goletic                                                                                                                                                                                                                                                                                                                                                                  |
| EPI_ISL_677725, EPI_ISL_954746                                                                                                                                                                                                                                                                                                                                                                                                                                                                                                                                                                                 | General Hospital - Ohrid                                                                                                                                                 | Research Center for Genetic Engineering and Biotechnology "Georgi D. Efremov", Macedonian Academy of Sciences and Arts                                                                                                     | Adis Kandix; Dino Pecar; Enis Kandic; Lana Salihfendic; Rijad Konjhodzic                                                                                                                                                                                                                                                                                                                                                                                                                 |
| EPI_ISL_1972223                                                                                                                                                                                                                                                                                                                                                                                                                                                                                                                                                                                                | General Hospital - Prilep                                                                                                                                                | Research Center for Genetic Engineering and Biotechnology "Georgi D. Efremov", Macedonian Academy of Sciences and Arts                                                                                                     | Aleksandar J. Dimovski; Dijana Plascheska-Karanfilska; Gjorgji Bozinovski; Milena Jakimovska; Predrag Noveski                                                                                                                                                                                                                                                                                                                                                                            |
| EPI_ISL_2839548                                                                                                                                                                                                                                                                                                                                                                                                                                                                                                                                                                                                | General Hospital - Veles                                                                                                                                                 | Research Center for Genetic Engineering and Biotechnology "Georgi D. Efremov", Macedonian Academy of Sciences and Arts                                                                                                     | Aleksandar J. Dimovski; Dijana Plascheska-Karanfilska; Gjorgji Bozinovski; Milena Jakimovska; Predrag Noveski                                                                                                                                                                                                                                                                                                                                                                            |
| EPI_ISL_406798                                                                                                                                                                                                                                                                                                                                                                                                                                                                                                                                                                                                 | General Hospital of Central Theater Command of People's Liberation Army of China                                                                                         | BGI & Institute of Microbiology, Chinese Academy of Sciences & Shandong First Medical University & Shandong Academy of Medical Sciences & General Hospital of Central Theater Command of People's Liberation Army of China | Weifeng Shi and Zhenhong Hu; Weijun Chen; Yuhai Bi                                                                                                                                                                                                                                                                                                                                                                                                                                       |
| EPI_ISL_746504, EPI_ISL_746585, EPI_ISL_746650, EPI_ISL_1167708, EPI_ISL_1167729, EPI_ISL_1300455, EPI_ISL_1321509, EPI_ISL_1321544, EPI_ISL_1470544, EPI_ISL_1712375, EPI_ISL_2391112, EPI_ISL_2391123, EPI_ISL_2391231, EPI_ISL_2391354, EPI_ISL_2391451, EPI_ISL_2391462, EPI_ISL_2508616, EPI_ISL_2509182, EPI_ISL_2659133, EPI_ISL_2756072, EPI_ISL_2756105, EPI_ISL_2756151, EPI_ISL_2756237, EPI_ISL_2894930, EPI_ISL_3132695, EPI_ISL_3149084, EPI_ISL_3185690, EPI_ISL_3364940, EPI_ISL_3368432, EPI_ISL_3369293, EPI_ISL_3369363, EPI_ISL_3536108, EPI_ISL_3537145, EPI_ISL_3537336, EPI_ISL_3537360 | Genetica Molecular and Subdepartamento de Virologia ISP Chile                                                                                                            | Andres Castillo; Barbara Parra; Constanza Campano; Gisselle Barra; Jaime Lagos; Javier Tognarelli; Jorge Fernandez; Karen Orostica; Loredana Arata; Patricia Bustos; Rodrigo Fasce; Soledad Ulloa                          |                                                                                                                                                                                                                                                                                                                                                                                                                                                                                          |
| EPI_ISL_3857568                                                                                                                                                                                                                                                                                                                                                                                                                                                                                                                                                                                                | Genome Analysis Center, Yamanashi Central                                                                                                                                | Genome Analysis Center, Yamanashi Central Hospital                                                                                                                                                                         | Yosuke Hirotsu                                                                                                                                                                                                                                                                                                                                                                                                                                                                           |

|                                                                                                                                                                                                                                                             |                                                                                                                                                                     |                                                                                                                                                    |                                                                                                                                                                                                                                                                                                                                                                                                                                                                                                                                                                                                                                                                                                                                                 |
|-------------------------------------------------------------------------------------------------------------------------------------------------------------------------------------------------------------------------------------------------------------|---------------------------------------------------------------------------------------------------------------------------------------------------------------------|----------------------------------------------------------------------------------------------------------------------------------------------------|-------------------------------------------------------------------------------------------------------------------------------------------------------------------------------------------------------------------------------------------------------------------------------------------------------------------------------------------------------------------------------------------------------------------------------------------------------------------------------------------------------------------------------------------------------------------------------------------------------------------------------------------------------------------------------------------------------------------------------------------------|
| EPI_ISL_735337                                                                                                                                                                                                                                              | Hospital<br>Genomic Laboratory (GLAB) (Conjoint lab of Health Directorate of Istanbul and Istanbul Technical University)                                            | Genomic Laboratory (GLAB), Istanbul Technical University                                                                                           | Arzu Irvem; Ayse Serra Ozel; Betsi Kose; Gizem Alkurt; Gizem Dinler Doganay; Ilker Karacan; Jale Yildiz; Levent Doganay; Mehtap Aydin; Nihat Bugra Agaoglu; Nilsun Altunal; Nisan Denizce Can; Ozlem Akgun Dogan; Payam Zolfagharian; Tugba Kizilboga Akgun; Yasemin Kendir Demirkol                                                                                                                                                                                                                                                                                                                                                                                                                                                            |
| EPI_ISL_632908                                                                                                                                                                                                                                              | Genomic Sciences, Rehman Medical Institute                                                                                                                          | Genomic Sciences, Rehman Medical Institute                                                                                                         | Afridi; Ali, J.; H. and Jehanzeb, V.; Haider; Jan; S.A.; Sabiha, B.; U.K.                                                                                                                                                                                                                                                                                                                                                                                                                                                                                                                                                                                                                                                                       |
| EPI_ISL_3215994                                                                                                                                                                                                                                             | Genomica Lab Molecular, Mexico                                                                                                                                      | Andersen lab at Scripps Research                                                                                                                   | Jose Horacio Reyna Verdugo; Jose Roman Chavez Mendez; Luis Alberto Rangel Gonzalez; Martin Gonzalez Ibarra; SEARCH Alliance San Diego with Jonathan Gonzalez Garcia                                                                                                                                                                                                                                                                                                                                                                                                                                                                                                                                                                             |
| EPI_ISL_812791, EPI_ISL_812834, EPI_ISL_2566467, EPI_ISL_2566470                                                                                                                                                                                            | Genomics Program, Children Cancer Hospital                                                                                                                          | Genomics Program, Children Cancer Hospital                                                                                                         | Abdelaziz, H.; Abdo, I.; Abouelnaga, S.; Almeldin, A.; Amer, K.; Bakry, U.; Diab, A.; El-Shaqnery, H.; El-Zayat, M.; ElHaddad, A.; ElHalafawy, A.; Elnaqeeb, M.; Farawela, H.; Farawyla, H.; Gomaa, C.; Hadad, A.; Halafawy, A.; Hammad, M.; Hassan, R.; Hassan, W.; Hatem, A.; Hossam, M.; Hussein, S.; Ismail, J.; Jalal, D.; Magdeldin, S.; Mansour, T.; Monuir, G.; Saaid, M.; Said, D.; Salah, H.; Samir, O.; Sayed, A.; Shalaby, L.; Soliman, M.; Soliman, S.; Yahia, A.; shalaby, L.                                                                                                                                                                                                                                                     |
| EPI_ISL_3230192, EPI_ISL_3385483                                                                                                                                                                                                                            | Genomik Solidaritas Indonesia Laboratorium                                                                                                                          | Genomik Solidaritas Indonesia Laboratorium                                                                                                         | Anna Christina Brazia; Annisa Muthiah Sukirman; Anuraj Shankar; Ariel Pradipta; Carissa Sintca Wijaya; Dhalhia Agustina Cahyono; Gracia Felias Enos Krompisi; Himawan Masyhuri; Louisa Markus; Meutia Ayuputeri Kumaheri; Vania Gavrila Wikasa                                                                                                                                                                                                                                                                                                                                                                                                                                                                                                  |
| EPI_ISL_539557                                                                                                                                                                                                                                              | Gerencia del área de salud de Badajoz, Llerena y Zafra                                                                                                              | Instituto de Salud Carlos III                                                                                                                      | A. Monzón; C. Pazos; F. Casas; I; I. Jiménez; Iglesias-Caballero; M. Camarero; M. Cuesta; M. González-Esguevillas; M. Molinero Calamita; M. Zaballos; P. Jiménez; S. Juliá; S. Pozo; S. Varona                                                                                                                                                                                                                                                                                                                                                                                                                                                                                                                                                  |
| EPI_ISL_745664                                                                                                                                                                                                                                              | Ginkgo Bioworks Clinical Laboratory                                                                                                                                 | Utah Public Health Laboratory                                                                                                                      | Alex Plocik; Becky Schilling; Birgitte Simen; David R. Hillyard; E. Susan Slechta; Erin L. Young; James McGann; Jeffrey B. Stevenson; Jim Griffin; Keith Robison; Kelly Oakeson; Malaika McKenzie-Bennett; Martha Pierson; Melanie A. Mallory; Michael T. Pyne; Michelle Spencer; Rebecca Littlefield; Salika M. Shakir; Tara Gallagher                                                                                                                                                                                                                                                                                                                                                                                                         |
| EPI_ISL_3866891, EPI_ISL_3866893                                                                                                                                                                                                                            | Global Medical Center                                                                                                                                               | Virology Lab, Jaber Al Ahmad Hospital                                                                                                              | Dr. Ebba Al-Awadhi; Dr. Zahrah Buhamad; Estabraq Kathim; Haroon Masih; Khubaid-ur-Rehman                                                                                                                                                                                                                                                                                                                                                                                                                                                                                                                                                                                                                                                        |
| EPI_ISL_775020                                                                                                                                                                                                                                              | Gonoshasthya-RNA Molecular Research Center                                                                                                                          | Gonoshasthya-RNA Molecular Research Center                                                                                                         | Firoz Ahmed; Maha Jamiruddin; Mahfuz Marzan; Md. Ahsanul Haq; Mohd. Raaed Jamiruddin; Mohib Ullah Khondoker; Mousumi Chaity; Mumtarin Jannat Oishee; Nafisa Azmuda; Nihad Adnan; Nowshin Jahan; Salma Akter; Sayeda Moriam Liza; Shahad Saif Khandker; Shahana Sharmin; Tamanna Ali; Taslin Jahan Mou                                                                                                                                                                                                                                                                                                                                                                                                                                           |
| EPI_ISL_496643, EPI_ISL_496914, EPI_ISL_1225441, EPI_ISL_1225458, EPI_ISL_1225481, EPI_ISL_1225505, EPI_ISL_1225511, EPI_ISL_1225513, EPI_ISL_1225547, EPI_ISL_1225556, EPI_ISL_1225558, EPI_ISL_1225577, EPI_ISL_1502855, EPI_ISL_1502919, EPI_ISL_1503107 | see above                                                                                                                                                           | Gorgas Memorial Laboratory of Health Studies                                                                                                       | Adriana Weeden; Alejandra Valoy; Alexander A Martinez; Alexander Martinez; Ambar Moreno; Anyuri Ortiz; Brechla Moreno; Castillo Jorge; Claudia Gonzalez; Claudia Gonzalez Sandra Lopez-Verges; Daniel Castillo; Danilo Franco; Davis Beltran; Dimelza Arauz; Elimelec Valdespino; Franco Danilo; Gonzalez Claudia; Gretel Vasquez; Ilka Guerra; Isela Guerrero; Jessica Gondola; Jim Chang; Juan Miguel Pascale; Leyda Abrego; Lisseth Saenz; Lopez-Verges Sandra; Mabel Martinez-Montero; Maria Chen-German; Marlene Castillo; Marlene Castillo; Martinez Alexander; Melissa Gaitan; Moreno Ambar; Moreno Brechla; Oris Chavarria; Ortiz Alma; Rita Corrales; Rita Rodriguez; Sandra Lopez-Verges; Yamilka Diaz; Yaneth Pitti; Zumara Chaverra |
| EPI_ISL_3507501                                                                                                                                                                                                                                             | Government General Hospital                                                                                                                                         | Centre for DNA Fingerprinting and Diagnostics                                                                                                      | Ashwin Dalal; Asmita Gupta; Divya Vashisht; Nagamani Kamilli; Reelina Basu; Vinay Donipadi                                                                                                                                                                                                                                                                                                                                                                                                                                                                                                                                                                                                                                                      |
| EPI_ISL_3507520                                                                                                                                                                                                                                             | Government Maternity Hospital                                                                                                                                       | Centre for DNA Fingerprinting and Diagnostics                                                                                                      | Ashwin Dalal; Asmita Gupta; Divya Vashisht; Murali Bashyam; Nagamani Kamilli; Reelina Basu; Vinay Donipadi                                                                                                                                                                                                                                                                                                                                                                                                                                                                                                                                                                                                                                      |
| EPI_ISL_2105484                                                                                                                                                                                                                                             | Governor Celestino Gallares Memorial Hospital                                                                                                                       | Philippine Genome Center                                                                                                                           | Alethea R. de Guzman; Anna Ong-Lim; Arianne A. Zamora; Asia Louisa U. Chong; Benedict A. Maralit; Candice Francheska B. Tambaoan; Carlo M. Lapid; Celia Carlos; Devon Ray Pacial; Edsel Maurice Salvaña; El King D. Morado; Eva Maria Cutiongco-de la Paz; Francis A. Tablizo; Irish Coleen A. Asin; Jaime C. Montoya; Jan Michael C. Yap; Jo-Hannah S. Llames; John Q. Wong; Joshua Gregor A. Dizon; Juan Antonio R. Magalang; Karol Sophia Agape R. Padilla; Kenneth M. Kim; Kris P. Punayan; Marc Edsel C. Ayes; Marc Jerrone R. Castro; Maria Rosario Singh-Vergeire and Cynthia P. Saloma; Maria Sofia L. Yangzon; Marissa Alejandria; Razel Nikka M. Hao; Rianna Patricia S. Cruz; Sheila Mae M. Araiza                                   |
| EPI_ISL_2602199                                                                                                                                                                                                                                             | Gravity Diagnostics, LLC                                                                                                                                            | Gravity Diagnostics, LLC                                                                                                                           | Gravity Diagnostics                                                                                                                                                                                                                                                                                                                                                                                                                                                                                                                                                                                                                                                                                                                             |
| EPI_ISL_2364885, EPI_ISL_2371359                                                                                                                                                                                                                            | Greek Genome Center, Biomedical Research Foundation of the Academy of Athens (BRFAA)                                                                                | Greek Genome Center, Biomedical Research Foundation of the Academy of Athens (BRFAA)                                                               | Dimitrios Thanos; Emmanouil Athanasiadis; Giannis Vatsellas; Katerina Zoi; Theodoros Loupis                                                                                                                                                                                                                                                                                                                                                                                                                                                                                                                                                                                                                                                     |
| EPI_ISL_698265                                                                                                                                                                                                                                              | Group 42 (G42) Healthcare, Abu Dhabi, United Arab Emirates; Department of Health, The United Arab Emirates                                                          | G42 Healthcare                                                                                                                                     | Ashish Koshy; Budoor Alqarni; Denghui Liu; Fang Chen; Hanif Khalak; Huanming Yang; Javier Quilez; Jian Wang; Junhua Li; Ke Liang; Long Lin; Mohammed Saifuddin Fasiluddin; Nan Qiao; Nawal Ahmed Mohamed Al Kaabi; Pauline Ogrodzki; Pei Wu; Peng Xiao; Pengjuan Liu; Rong Liu; Sally Mahmoud; Siyang Liu; Stephen S. Francis; Tao Ma; Vinay Kusuma; Walid Abbas Zaher; Weibin Liu; Wenjun He; Xavier Anton; Xin Jin; Xin Meng; Xinyu Huang; Xun Xu; Zhaorong Yuan                                                                                                                                                                                                                                                                              |
| EPI_ISL_2339779                                                                                                                                                                                                                                             | Grupo de Investigación en Enfermedades Tropicales del Ejército (GINETE), Laboratorio de Referencia e Investigación, Dirección de Sanidad Ejército, Bogotá, Colombia | Centro de Investigaciones en Microbiología y Biotecnología-UR (CIMBIUR), Facultad de Ciencias Naturales, Universidad del Rosario, Bogotá, Colombia | Camilo A. Correa-Cárdenas; Carolina Oliveros; Claudia Méndez; Elizabeth K. Márquez; Frank de los Santos Ortiz; Juan David Ramírez; Julie Pérez; Lorena Albarracín; Luz H. Patiño; Maria Clara Duque; Marina Muñoz; María Teresa Alvarado; Nathalia Ballesteros; Sergio Castañeda; Sergio Gutierrez-Riveros; Yanira Romero; Zulma Cucunubá                                                                                                                                                                                                                                                                                                                                                                                                       |
| EPI_ISL_1273073, EPI_ISL_3241987, EPI_ISL_3355147                                                                                                                                                                                                           | Guam Public Health Laboratory                                                                                                                                       | Centers for Disease Control and Prevention Division of Viral Diseases, Pathogen Discovery                                                          | Alex Burgin; Anna Montmayeur; Anna Uehara; Ben L. Rambo-Martin; Ben Rambo-Martin; Clinton Paden; Clinton R. Paden; Dakota Howard; Dave Wentworth; Dhvani Batra; Haibin Wang; Jasmine Padilla; Jing Zhang; Justin Lee; Katie Dillon; Krista Queen; Kristen Knipe; Kristine Lacek; Lori Rowe; Mark Burroughs; Matthew Schmerer; Meghan Bentz; Mili Sheth; Peter Cook; Peter W. Cook; Rachel Marine; Sam Shepard; Sarah Nobles; Shoshona Le; Suxiang Tong; Vivien Dugan; Yan Li; Ying Tao; Yvette Unoarumhi                                                                                                                                                                                                                                        |
| EPI_ISL_547610, EPI_ISL_2376254                                                                                                                                                                                                                             | Gundersen Clinical Microbiology Laboratory                                                                                                                          | Kabara Cancer Research Institute                                                                                                                   | Craig S. Richmond; Paraic A. Kenny                                                                                                                                                                                                                                                                                                                                                                                                                                                                                                                                                                                                                                                                                                              |
| EPI_ISL_547722, EPI_ISL_660987                                                                                                                                                                                                                              | Gundersen Molecular Diagnostics Laboratory                                                                                                                          | Kabara Cancer Research Institute                                                                                                                   | Craig S. Richmond; Paraic A. Kenny                                                                                                                                                                                                                                                                                                                                                                                                                                                                                                                                                                                                                                                                                                              |
| EPI_ISL_3636981                                                                                                                                                                                                                                             | H Braga                                                                                                                                                             | Instituto Nacional de Saude (INSA)                                                                                                                 | Borges et al                                                                                                                                                                                                                                                                                                                                                                                                                                                                                                                                                                                                                                                                                                                                    |
| EPI_ISL_1117012                                                                                                                                                                                                                                             | H García de Orta                                                                                                                                                    | Instituto Nacional de Saude (INSA)                                                                                                                 | Borges et al                                                                                                                                                                                                                                                                                                                                                                                                                                                                                                                                                                                                                                                                                                                                    |
| EPI_ISL_693535                                                                                                                                                                                                                                              | H Vila Franca Xira                                                                                                                                                  | Instituto Nacional de Saude (INSA)                                                                                                                 | Borges et al                                                                                                                                                                                                                                                                                                                                                                                                                                                                                                                                                                                                                                                                                                                                    |
| EPI_ISL_1023463                                                                                                                                                                                                                                             | HD Figueira Foz                                                                                                                                                     | Instituto Nacional de Saude (INSA)                                                                                                                 | Borges et al                                                                                                                                                                                                                                                                                                                                                                                                                                                                                                                                                                                                                                                                                                                                    |
| EPI_ISL_2984904                                                                                                                                                                                                                                             | HELEN JOSEPH LABORATORY                                                                                                                                             | National Institute for Communicable Diseases of the National Health Laboratory Service                                                             | Amoako DG; Bhiman JN; Everatt J; Ismail A; Mahlangu B; Mnguni A; Mohale T; Ntuli N; Scheepers C                                                                                                                                                                                                                                                                                                                                                                                                                                                                                                                                                                                                                                                 |
| EPI_ISL_1400557, EPI_ISL_2385288, EPI_ISL_2899778                                                                                                                                                                                                           | HELIX LLC                                                                                                                                                           | WHO National Influenza Centre Russian Federation                                                                                                   | Andrey Komissarov; Anna Ivanova; Artem Fadeev; Daria Danilenko; Dmitry Bazhenov; Dmitry Lioznov; Elena Nabieva; Georgii Bazykin; Kirill Varchenko; Ksenia Safina; Kseniya Komissarova; Maria Pisareva; Maria Timofeeva; Mikhail Bakaev; Nikita Yolshin; Oula Mansour; Oula Masour; Tamila Musaeva; Veronika Eder                                                                                                                                                                                                                                                                                                                                                                                                                                |
| EPI_ISL_1117929                                                                                                                                                                                                                                             | HG Pharma GmbH                                                                                                                                                      | Bergthaler laboratory, CeMM Research Center for Molecular Medicine of the Austrian Academy of Sciences                                             | Andreas Bergthaler; Anna Schedl; Bekir Erguner; Benedikt Agerer; Christoph Bock; Jan Laine; Lukas Endler; Maelle Le Moing; Martin Senekowitsch; Michael Schuster; Thomas Penz                                                                                                                                                                                                                                                                                                                                                                                                                                                                                                                                                                   |
| EPI_ISL_3536479, EPI_ISL_3536485                                                                                                                                                                                                                            | HLAGYN - Laboratorio de Imunologia de Transplantes de Goias                                                                                                         | HLAGYN - Laboratorio de Imunologia de Transplantes de Goias                                                                                        | Alessandro Leonardo Alvares Magalhaes; Erika Lopes Rocha Batista; Fernando Antonio Vinalh dos Santos; Frederico Rodrigues Vinalh; Kamila Oliveira Reis De Freitas.; Lucas Carlos Gomes Pereira; Sabrina Sara Moreira Duarte                                                                                                                                                                                                                                                                                                                                                                                                                                                                                                                     |
| EPI_ISL_2611665                                                                                                                                                                                                                                             | HOME QUARANTINE TASKFORCE                                                                                                                                           | Hong Kong Department of Health                                                                                                                     | Alan K.L. Tsang; Dominic N.C. Tsang; Edman T.K. Lam; Ken H.L. Ng; Peter C.W. Yip; Rickjason C.W. Chan                                                                                                                                                                                                                                                                                                                                                                                                                                                                                                                                                                                                                                           |
| EPI_ISL_3267066, EPI_ISL_3452811                                                                                                                                                                                                                            | HOPITAL NOSTRA SENYORA MERITXELL                                                                                                                                    | CHU Purpan - Laboratoire de Virologie - Institut Fédératif de Biologie                                                                             | Boyer P.; Carcenac R.; Ferrer V.; Harter A.; Izopet J.; Jeanne N.; Latour J.; Ranger N.; Tremieux R.                                                                                                                                                                                                                                                                                                                                                                                                                                                                                                                                                                                                                                            |
| EPI_ISL_1336649                                                                                                                                                                                                                                             | HOPITAL PRINCESSE GRACE                                                                                                                                             | CNR Virus des Infections Respiratoires - France SUD                                                                                                | Antonin Bal; Bruno Lina; Gregory Destras; Gwendolynne Burfin; Hadrien Regue; Laurence Josset; Martine Valette; Quentin Semanas                                                                                                                                                                                                                                                                                                                                                                                                                                                                                                                                                                                                                  |
| EPI_ISL_2674339                                                                                                                                                                                                                                             | HOSPITAL COMUNAL MALVINAS                                                                                                                                           | Instituto Nacional de Salud- Dirección de Investigación en Salud Pública                                                                           | Carlos Franco-Muñoz; Carmen Osorio; Diana Malo; Diego A. Álvarez-Díaz; Diego Andrés Prada; Gerardo Santamaría; Hector Alejandro Ruiz-Moreno; Jhonnatan Reales-González; Jorge Rivera; Juan Camilo Martínez; Julian Naizaque; Katherine Laiton-Donato; Lisseth Pardo; Magdalena Wiesner; Marcela Mercado-Reyes; Maria T. Herrera-Sepúlveda; Marta Lopez Blanco; Martha Lucia Ospina Martínez; Paola Rojas; Sergio Gomez; Sheryll Corchuelo; Ángela Alarcon Cruz                                                                                                                                                                                                                                                                                  |
| EPI_ISL_2502738                                                                                                                                                                                                                                             | HOSPITAL DR. MAX TERAN VALLS                                                                                                                                        | Incinsa, Instituto Costarricense de Investigación y Enseñanza en Nutrición y Salud                                                                 | Adriana Godínez; Claudio Soto-Garita; Estela Cordero; Francisco Duarte; Hebleen Porras; Jose Luis Vargas; Joselyn Prado & María Jose Gómez-Umaña; Mariela Gutierrez; Melany Calderón                                                                                                                                                                                                                                                                                                                                                                                                                                                                                                                                                            |
| EPI_ISL_3638835                                                                                                                                                                                                                                             | HOSPITAL DR. RAFAEL A. CALDERON GUARDIA                                                                                                                             | Incinsa, Instituto Costarricense de Investigación y Enseñanza en Nutrición y Salud                                                                 | Adriana Godínez; Claudio Soto-Garita; Estela Cordero; Francisco Duarte; Hebleen Porras; Joselyn Prado & Fabian Salas; José Luis Vargas; Mariela Gutiérrez; Melany Calderón                                                                                                                                                                                                                                                                                                                                                                                                                                                                                                                                                                      |
| EPI_ISL_2502733                                                                                                                                                                                                                                             | HOSPITAL GUAPILES                                                                                                                                                   | Incinsa, Instituto Costarricense de Investigación y Enseñanza en Nutrición y Salud                                                                 | Adriana Godínez; Claudio Soto-Garita; Estela Cordero; Francisco Duarte; Hebleen Porras; Jose Luis Vargas; Joselyn Prado & Cesar Cerdas-Quesada; Mariela Gutierrez; Melany Calderón                                                                                                                                                                                                                                                                                                                                                                                                                                                                                                                                                              |
| EPI_ISL_2502729                                                                                                                                                                                                                                             | HOSPITAL LA ANEXION                                                                                                                                                 | Incinsa, Instituto Costarricense de Investigación y Enseñanza en Nutrición y Salud                                                                 | Adriana Godínez; Claudio Soto-Garita; Estela Cordero; Francisco Duarte; Hebleen Porras; Jose Luis Vargas; Joselyn Prado & Ivanna Krize-Morún; Mariela Gutierrez; Melany Calderón                                                                                                                                                                                                                                                                                                                                                                                                                                                                                                                                                                |
| EPI_ISL_3797835                                                                                                                                                                                                                                             | HOSPITAL MANACOR                                                                                                                                                    | HOSPITAL UNIVERSITARIO SON ESPASES                                                                                                                 | Dr. Antonio Oliver; Dr. Carla López-Causapé; Dr. Gabriel Cabot; Hospital Universitario Son Espases; on behalf of Servicio de Microbiología                                                                                                                                                                                                                                                                                                                                                                                                                                                                                                                                                                                                      |
| EPI_ISL_3037844, EPI_ISL_3274355                                                                                                                                                                                                                            | HOSPITAL METROPOLITANO                                                                                                                                              | Incinsa, Instituto Costarricense de Investigación y Enseñanza en Nutrición y Salud                                                                 | Adriana Godínez; Caterina Guzmán; Claudio Soto-Garita; Estela Cordero; Francisco Duarte; Hebleen Porras; José Luis Vargas; Mariela Gutiérrez Joselyn Prado; Melany Calderón; Nazareth Ruiz & Margarita Lee                                                                                                                                                                                                                                                                                                                                                                                                                                                                                                                                      |
| EPI_ISL_2502746                                                                                                                                                                                                                                             | HOSPITAL MEXICO                                                                                                                                                     | Incinsa, Instituto Costarricense de Investigación y Enseñanza en Nutrición y Salud                                                                 | Adriana Godínez; Claudio Soto-Garita; Estela Cordero; Francisco Duarte; Hebleen Porras; Jose Luis Vargas; Joselyn Prado & Juan Vilallobos; Mariela Gutierrez; Melany Calderón                                                                                                                                                                                                                                                                                                                                                                                                                                                                                                                                                                   |
| EPI_ISL_3639151                                                                                                                                                                                                                                             | HOSPITAL MONSEÑOR SANABRIA                                                                                                                                          | Incinsa, Instituto Costarricense de Investigación y Enseñanza en Nutrición y Salud                                                                 | Adriana Godínez; Claudio Soto-Garita; Estela Cordero; Francisco Duarte; Hebleen Porras; Joselyn Prado & Andrea Moreno; José Luis Vargas; Mariela Gutiérrez; Melany Calderón                                                                                                                                                                                                                                                                                                                                                                                                                                                                                                                                                                     |
| EPI_ISL_3761771, EPI_ISL_3761786                                                                                                                                                                                                                            | HOSPITAL NACIONAL DE NIÑOS                                                                                                                                          | Incinsa, Instituto Costarricense de Investigación y Enseñanza en Nutrición y Salud                                                                 | Cristian Pérez-Corrales & Valeria Peralta-Barquero                                                                                                                                                                                                                                                                                                                                                                                                                                                                                                                                                                                                                                                                                              |
| EPI_ISL_3639005                                                                                                                                                                                                                                             | HOSPITAL SAN FRANCISCO DE ASIS                                                                                                                                      | Incinsa, Instituto Costarricense de Investigación y Enseñanza en Nutrición y Salud                                                                 | Adriana Godínez; Claudio Soto-Garita; Estela Cordero; Francisco Duarte; Hebleen Porras; Joselyn Prado & Adrián Fallas Mora; José Luis Vargas; Mariela Gutiérrez; Melany Calderón                                                                                                                                                                                                                                                                                                                                                                                                                                                                                                                                                                |
| EPI_ISL_2502724, EPI_ISL_2502760                                                                                                                                                                                                                            | HOSPITAL SAN JUAN DE DIOS                                                                                                                                           | Incinsa, Instituto Costarricense de Investigación y Enseñanza en Nutrición y Salud                                                                 | Adriana Godínez; Claudio Soto-Garita; Estela Cordero; Francisco Duarte; Hebleen Porras; Jose Luis Vargas; Joselyn Prado & Andony Cordero-Jimenez; Joselyn Prado & Marco Chávés-Otárola; Mariela Gutierrez; Melany Calderón                                                                                                                                                                                                                                                                                                                                                                                                                                                                                                                      |
| EPI_ISL_2103373, EPI_ISL_3037808                                                                                                                                                                                                                            | HOSPITAL SAN JUAN DE DIOS                                                                                                                                           | Incinsa, Instituto Costarricense de Investigación y Enseñanza en Nutrición y Salud                                                                 | Adriana Godínez & Melany Calderon; Adriana Godínez; Caterina Guzmán; Claudio Soto-Garita; Estela Cordero; Francisco Duarte; Hebleen Brenes; Hebleen Porras; José Luis Vargas; Mariela Gutiérrez Joselyn Prado; Melany Calderón; Nazareth Ruiz & Juliana Mora                                                                                                                                                                                                                                                                                                                                                                                                                                                                                    |

|                                                                                                                                                                                                                                                               |                                                                                                                                                                  |                                                                                                                                                                                                     |                                                                                                                                                                                                                                                                                                                                                                                                                                                                                                                                                                                                                                                                                                                                                                                                                                                                                                                                                                                                                                                                                                                                                                                                                                                                                                                                                                                                                                                                                                                                                                                                                            |  |
|---------------------------------------------------------------------------------------------------------------------------------------------------------------------------------------------------------------------------------------------------------------|------------------------------------------------------------------------------------------------------------------------------------------------------------------|-----------------------------------------------------------------------------------------------------------------------------------------------------------------------------------------------------|----------------------------------------------------------------------------------------------------------------------------------------------------------------------------------------------------------------------------------------------------------------------------------------------------------------------------------------------------------------------------------------------------------------------------------------------------------------------------------------------------------------------------------------------------------------------------------------------------------------------------------------------------------------------------------------------------------------------------------------------------------------------------------------------------------------------------------------------------------------------------------------------------------------------------------------------------------------------------------------------------------------------------------------------------------------------------------------------------------------------------------------------------------------------------------------------------------------------------------------------------------------------------------------------------------------------------------------------------------------------------------------------------------------------------------------------------------------------------------------------------------------------------------------------------------------------------------------------------------------------------|--|
| EPI_ISL_3026021                                                                                                                                                                                                                                               | HOSPITAL SAN RAFAEL DE ALAJUELA [ALAJUELA/ALAJUELA]                                                                                                              | Incienza, Instituto Costarricense de Investigación y Enseñanza en Nutrición y Salud                                                                                                                 | Adriana Godínez; Caterina Guzmán; Claudio Soto-Garita; Estela Cordero; Francisco Duarte; Hebleen Porras; Joselyn Prado; José Luis Vargas; Mariela Gutiérrez; Melany Calderón; Nazareth Ruiz & Christian Sanchez                                                                                                                                                                                                                                                                                                                                                                                                                                                                                                                                                                                                                                                                                                                                                                                                                                                                                                                                                                                                                                                                                                                                                                                                                                                                                                                                                                                                            |  |
| EPI_ISL_3298345                                                                                                                                                                                                                                               | HOSPITAL SAN VICENTE DE PAUL                                                                                                                                     | Incienza, Instituto Costarricense de Investigación y Enseñanza en Nutrición y Salud                                                                                                                 | Adriana Godínez; Claudio Soto-Garita; Estela Cordero; Francisco Duarte; Hebleen Porras; Joselyn Prado & Silvia Sáenz; José Luis Vargas; Mariela Gutiérrez; Melany Calderón                                                                                                                                                                                                                                                                                                                                                                                                                                                                                                                                                                                                                                                                                                                                                                                                                                                                                                                                                                                                                                                                                                                                                                                                                                                                                                                                                                                                                                                 |  |
| EPI_ISL_2096775                                                                                                                                                                                                                                               | Hadassah Medical Center Clinical Virology Laboratory, Hadassah Ein Kerem                                                                                         | Hadassah Hebrew University Viral Sequencing Group, Hadassah Hebrew University Medical Center                                                                                                        | Dana G. Wolf; Esther Oiknine-Djian; Hadar Golan Berman; Mila Rivkin; Sheera Adar                                                                                                                                                                                                                                                                                                                                                                                                                                                                                                                                                                                                                                                                                                                                                                                                                                                                                                                                                                                                                                                                                                                                                                                                                                                                                                                                                                                                                                                                                                                                           |  |
| EPI_ISL_1919419, EPI_ISL_3542756, EPI_ISL_3797746, EPI_ISL_3834456                                                                                                                                                                                            | Haukeland University Hospital, Dept. of Microbiology                                                                                                             | Norwegian Institute of Public Health, Department of Virology                                                                                                                                        | Atiya R Ali; Debech Nadia; Engebretsen Serina Beate; Garcia Llorente Ignacio; Hilde Elshaug; Hilde Vollan; Jon Bråte; Kamilla Heddeland Instefjord; Karoline Bragstad; Kathrine Stene-Johansen; Line Victoria Moen; Marie Paulsen Madsen; Olav Hungnes; Pedersen Benedikte Nevjen; Rasmus Riis Kopperud                                                                                                                                                                                                                                                                                                                                                                                                                                                                                                                                                                                                                                                                                                                                                                                                                                                                                                                                                                                                                                                                                                                                                                                                                                                                                                                    |  |
| EPI_ISL_2938098                                                                                                                                                                                                                                               | Health Center Novi Grad Sarajevo                                                                                                                                 | Clinical Center, University of Sarajevo; Unit for Clinical Microbiology                                                                                                                             | Amela Dedeić-Ljubović; Edina Zahirović; Irma Salimović-Besić; Sandra Vegar-Zubović; Sebia Izetbegović                                                                                                                                                                                                                                                                                                                                                                                                                                                                                                                                                                                                                                                                                                                                                                                                                                                                                                                                                                                                                                                                                                                                                                                                                                                                                                                                                                                                                                                                                                                      |  |
| EPI_ISL_796015                                                                                                                                                                                                                                                | Hebei Provincial Center for Disease Control and Prevention, Shijiazhuang, Hebei Province; National Institute for Viral Disease Control and Prevention, China CDC | Hebei Provincial Center for Disease Control and Prevention, Shijiazhuang, Hebei Province; National Institute for Viral Disease Control and Prevention, China CDC                                    | George F. Gao; Nankun Liu; Qi Li; Shunxiang Qi; Wenbo Xu; Xiang Zhao; Yang Song                                                                                                                                                                                                                                                                                                                                                                                                                                                                                                                                                                                                                                                                                                                                                                                                                                                                                                                                                                                                                                                                                                                                                                                                                                                                                                                                                                                                                                                                                                                                            |  |
| EPI_ISL_1088999, EPI_ISL_1089203, EPI_ISL_1089366                                                                                                                                                                                                             | Helix / Illumina                                                                                                                                                 | Respiratory Viruses Branch, Division of Viral Diseases, Centers for Disease Control and Prevention                                                                                                  | Alexandre Bolze; Ary Ascencio; Ben L. Rambo-Martin; Brad Sickler; Charlotte Rivera-Garcia; Christine Tran; Clinton R. Paden; Dakota Howard; David Becker; Dhvani Batra; Duncan MacCannell; Efrén Sandoval; Eileen de Feo; Elizabeth Cirulli; Eric Allen; Geraint Levan; James Lu; Jan Antico; Jason Nguyen; Jimmy Ramirez; Jingtao Liu; Kelly Schiabor Barrett; Kim Gietzen; Magnus Isaksson; Marc Laurent; Matthew Tolentino; Nicole L. Washington; Peter W. Cook; Phil Febbo; Ryan Cho; Shannon Wickline; Sherry Wang; Simon White; Summer Galloway; Suxiang Tong; Tyler Cassens; William Lee                                                                                                                                                                                                                                                                                                                                                                                                                                                                                                                                                                                                                                                                                                                                                                                                                                                                                                                                                                                                                            |  |
| EPI_ISL_2159479, EPI_ISL_2159835, EPI_ISL_2159875, EPI_ISL_2159947, EPI_ISL_2160000, EPI_ISL_2247823, EPI_ISL_2248033, EPI_ISL_2248323, EPI_ISL_2270556                                                                                                       | see above                                                                                                                                                        | Centers for Disease Control and Prevention Division of Viral Diseases, Pathogen Discovery                                                                                                           | Adrian Paskey; Alexandre Bolze; Ary Ascencio; Benjamin Rambo-Martin; Brad Sickler; Charlotte Rivera-Garcia; Christine Tran; Christopher Gulvick; Clinton R. Paden; Dakota Howard; Darlene Wagner; David Becker; Dhvani Batra; Duncan MacCannell; Efrén Sandoval; Eileen de Feo; Elizabeth Cirulli; Eric Allen; Geraint Levan; James Lu; Jan Antico; Jason Nguyen; Jimmy Ramirez; Jingtao Liu; Kara Moser; Kelly Schiabor Barrett; Kim Gietzen; Magnus Isaksson; Marc Laurent; Matthew Tolentino; Nicole L. Washington; Peter W. Cook; Phil Febbo; Ryan Cho; Scott Sammons; Shannon Wickline; Shatavia Morrison; Sherry Wang; Simon White; Tyler Cassens; William Lee; Yvette Unoarumi                                                                                                                                                                                                                                                                                                                                                                                                                                                                                                                                                                                                                                                                                                                                                                                                                                                                                                                                      |  |
| EPI_ISL_755616                                                                                                                                                                                                                                                | Helix/Illumina                                                                                                                                                   | Genomics and Discovery, Respiratory Viruses Branch, Division of Viral Diseases, Centers for Disease Control and Prevention                                                                          | Alexandre Bolze; Ary Ascencio; Brad Sickler; Charlotte Rivera-Garcia; Christine Tran; Clinton R. Paden; David Becker; Dhvani Batra; Duncan MacCannell; Efrén Sandoval; Eileen de Feo; Elizabeth Cirulli; Eric Allen; Geraint Levan; James Lu; Jan Antico; Jason Nguyen; Jimmy Ramirez; Jingtao Liu; Kelly Schiabor Barrett; Kim Gietzen; Magnus Isaksson; Marc Laurent; Matthew Tolentino; Nicole L. Washington; Peter W. Cook; Phil Febbo; Ryan Cho; Shannon Wickline; Sherry Wang; Simon White; Summer Galloway; Suxiang Tong; Tyler Cassens; William Lee                                                                                                                                                                                                                                                                                                                                                                                                                                                                                                                                                                                                                                                                                                                                                                                                                                                                                                                                                                                                                                                                |  |
| EPI_ISL_3689330                                                                                                                                                                                                                                               | Hellenic National Blood Transfusion Center - EKEA                                                                                                                | Greek Genome Center, Biomedical Research Foundation of the Academy of Athens (BRFAA)                                                                                                                | Dimitrios Thanos; Efthimia Petinaki; Emmanouil Athanasiadis; Giannis Vatsellas; Katerina Zoi; Kostas Stamoulis; Theodoros Loupis                                                                                                                                                                                                                                                                                                                                                                                                                                                                                                                                                                                                                                                                                                                                                                                                                                                                                                                                                                                                                                                                                                                                                                                                                                                                                                                                                                                                                                                                                           |  |
| EPI_ISL_700051, EPI_ISL_723048                                                                                                                                                                                                                                | Hematopathology Laboratory, ACTREC, TMC                                                                                                                          | Hematopathology Laboratory, ACTREC, TMC                                                                                                                                                             | ACTREC; Hematopathology Laboratory                                                                                                                                                                                                                                                                                                                                                                                                                                                                                                                                                                                                                                                                                                                                                                                                                                                                                                                                                                                                                                                                                                                                                                                                                                                                                                                                                                                                                                                                                                                                                                                         |  |
| EPI_ISL_2678286                                                                                                                                                                                                                                               | HerpeZ                                                                                                                                                           | Institute of Tropical Medicine                                                                                                                                                                      | Alimuddin Zumla; Edgar Simulundu; Franklyn Egbe Nkongo; John Tembo; Kangwa Mulonga; Kwitaka Maluzi; Le Thi Khu Linh; Lloyd Mulenga; Matthew Bates; Moses Chifulya; Nathan Kapata; Prof. Dr. Thirumalaisamy P Velavan; Sivaramakrishna Rachakonda; Sombo Fwoloshi; Srinivas Reddy Pallerla; Victor Mukonka                                                                                                                                                                                                                                                                                                                                                                                                                                                                                                                                                                                                                                                                                                                                                                                                                                                                                                                                                                                                                                                                                                                                                                                                                                                                                                                  |  |
| EPI_ISL_2811991, EPI_ISL_3502483, EPI_ISL_3833786, EPI_ISL_3834069                                                                                                                                                                                            | Histopath                                                                                                                                                        | NSW Health Pathology - Institute of Clinical Pathology and Medical Research; Westmead Hospital; University of Sydney                                                                                | Arnott A.; CIDM-PH et al.; Draper J.; Gail M.; Martinez E.; Rockett R.; Sintchenko V.; on behalf of ICPMR                                                                                                                                                                                                                                                                                                                                                                                                                                                                                                                                                                                                                                                                                                                                                                                                                                                                                                                                                                                                                                                                                                                                                                                                                                                                                                                                                                                                                                                                                                                  |  |
| EPI_ISL_3547107                                                                                                                                                                                                                                               | Home Quarantine Taskforce                                                                                                                                        | Hong Kong Department of Health                                                                                                                                                                      | Alan K.L. Tsang; Edman T.K. Lam; Ken H.L. Ng; Peter C.W. Yip; Rickjason C.W. Chan                                                                                                                                                                                                                                                                                                                                                                                                                                                                                                                                                                                                                                                                                                                                                                                                                                                                                                                                                                                                                                                                                                                                                                                                                                                                                                                                                                                                                                                                                                                                          |  |
| EPI_ISL_412029                                                                                                                                                                                                                                                | Hong Kong Department of Health                                                                                                                                   | The University of Hong Kong                                                                                                                                                                         | Daniel K.W. Chu; Dominic N.C. Tsang; Leo M. Poon; Malik Peiris                                                                                                                                                                                                                                                                                                                                                                                                                                                                                                                                                                                                                                                                                                                                                                                                                                                                                                                                                                                                                                                                                                                                                                                                                                                                                                                                                                                                                                                                                                                                                             |  |
| EPI_ISL_3149731, EPI_ISL_3825477                                                                                                                                                                                                                              | Hosp. Pediatrico Dr. Avelino Castellán                                                                                                                           | Laboratorio de Biología Molecular, Instituto de Medicina Regional on behalf of 'Proyecto Argentino Interinstitucional de genómica de SARS-CoV-2' (PAIS Consortium)                                  | Bettina Brusés; Gioia Lucia Marino; Griselda Oria; Horacio Lucero.; Javier Mussin; Julieta Ronchi; Laura Formicelli; María Andrea Gili; María Cecilia López; Melina Lorenzini Campos; Raúl Maximiliano Acevedo                                                                                                                                                                                                                                                                                                                                                                                                                                                                                                                                                                                                                                                                                                                                                                                                                                                                                                                                                                                                                                                                                                                                                                                                                                                                                                                                                                                                             |  |
| EPI_ISL_2462907, EPI_ISL_2462927, EPI_ISL_2532300, EPI_ISL_2628275, EPI_ISL_2757668, EPI_ISL_2790982, EPI_ISL_2790983, EPI_ISL_2835907, EPI_ISL_3058248, EPI_ISL_3542891, EPI_ISL_3542957, EPI_ISL_3542958, EPI_ISL_3542964, EPI_ISL_3690259, EPI_ISL_3801691 | see above                                                                                                                                                        | Hospital                                                                                                                                                                                            | Amaury Vaysse; Angela Brisebarre; Antoine Talarmin; Camille Capel; Christophe Malabat; Corinne Maufrais; CéCile Hermann; Didier Mattera; Emmanuelle Pernal; Etienne Simon-Lorière; Frédéric Lemoine; Hub Bioinformatique Biostatistiques; Hub de Bioinformatique et Biostatistique; Jérôme Durivault; Louise Lefrançois; MOUDJAHED Haciba; Marion Barbet; Maud Vanpeene; Méline Bizard; Olivier Dejoux; Sylvaine Bastian; Sylvie Behillili; Sylvie Van der Werf; Vincent Enouf                                                                                                                                                                                                                                                                                                                                                                                                                                                                                                                                                                                                                                                                                                                                                                                                                                                                                                                                                                                                                                                                                                                                             |  |
| EPI_ISL_1383905                                                                                                                                                                                                                                               | Hospital Center Emile Mayrisch                                                                                                                                   | Laboratoire national de sante, Microbiology, Microbial Genomics Platform                                                                                                                            | Anke Wienecke-Baldacchino; Catherine Ragimbeau; Cynthia Oxacelay; Fatu Djabi; Jessica Tapp; Lise Pignon; Raoul Salmon; Tamir Abdelrahman                                                                                                                                                                                                                                                                                                                                                                                                                                                                                                                                                                                                                                                                                                                                                                                                                                                                                                                                                                                                                                                                                                                                                                                                                                                                                                                                                                                                                                                                                   |  |
| EPI_ISL_2965568, EPI_ISL_2965583, EPI_ISL_2965584, EPI_ISL_2965585                                                                                                                                                                                            | Hospital Español                                                                                                                                                 | Centro de Innovación en Vigilancia Epidemiológica (CIVE), Institut Pasteur Montevideo, Uruguay                                                                                                      | Alicia Costáble; Alvaro Fajardo; Ana Moller; Andrés Lizasoain; Belén González; Bernardina Rivera; Cecilia Alonso; Cecilia Salazar; Gonzalo Bello; Gonzalo Moratorio; Gregorio Iraola; Henry Albornoz; Ignacio Ferrés; Javier Hurtado; Juan Zanetti; Julio Medina; Luciana Griffero; Lucía Spangenberg; Ma Noel Bentancor; Ma Pia Techera; Mailen Arleo; Martina Alonso; Matias Maidana; Mauricio Méndez; Melissa Duquila; Mercedes Paz; Natalia Rego; Natalia Reyes; Nicolas Nin; Odhille Chappos; Paula Perbollanachi; Pilar Moreno; Rodney Colina; Rodrigo Arce; Tamara Fernández-Calero; Tania Possi; Veronica Noya; Viviana Bortagaray                                                                                                                                                                                                                                                                                                                                                                                                                                                                                                                                                                                                                                                                                                                                                                                                                                                                                                                                                                                 |  |
| EPI_ISL_3671013                                                                                                                                                                                                                                               | Hospital Fundacion San Vicente de Paul                                                                                                                           | Universidad Nacional de Colombia - Laboratorio Genómico One Health                                                                                                                                  | Andres F. Cardona-Rios; Carlos Franco-Muñoz; Carolina Muñoz-Arango; Celeny Ortiz; Daniel O. Maldonado-Perez; Diego A. Álvarez-Díaz; Hector Alejandro Ruiz-Moreno; Idabely Betancur Ortiz; Jorge E. Osorio; Juan P. Hernandez-Ortiz; Karl A Ciuderis; Katherine Laiton-Donato; Laura Silvana Perez; Lina M. Hurtado; Marcela Mercado-Reyes; Maria Angélica Maya; María Stella López; Rita Almanza Payares; Sandra Ines Cano; Simón Villegas Velásquez                                                                                                                                                                                                                                                                                                                                                                                                                                                                                                                                                                                                                                                                                                                                                                                                                                                                                                                                                                                                                                                                                                                                                                       |  |
| EPI_ISL_2402511, EPI_ISL_3731081                                                                                                                                                                                                                              | Hospital General Universitario Gregorio Marañón                                                                                                                  | Hospital General Universitario Gregorio Marañón                                                                                                                                                     | Cristina Rodríguez-Grande; Darío García de Viedma; Julia Suárez; Laura Pérez-Lago; Marta Herranz Martin; Patricia Muñoz; Pedro Sola Campoy; Pilar Catalán; Sergio Buenestado Serrano; Victor Manuel de la Cueva                                                                                                                                                                                                                                                                                                                                                                                                                                                                                                                                                                                                                                                                                                                                                                                                                                                                                                                                                                                                                                                                                                                                                                                                                                                                                                                                                                                                            |  |
| EPI_ISL_2567551                                                                                                                                                                                                                                               | Hospital General Universitario de Alicante - Instituto de Investigación Sanitaria y Biomédica de Alicante                                                        | SeqCOVID-SPAIN consortium/IBV(CSIC)                                                                                                                                                                 | Carmen Molina Pardines and SeqCOVID-SPAIN consortium; Maripaz Ventero Martín                                                                                                                                                                                                                                                                                                                                                                                                                                                                                                                                                                                                                                                                                                                                                                                                                                                                                                                                                                                                                                                                                                                                                                                                                                                                                                                                                                                                                                                                                                                                               |  |
| EPI_ISL_471268                                                                                                                                                                                                                                                | Hospital IESS Babahoyo                                                                                                                                           | Institute of Microbiology, Universidad San Francisco de Quito                                                                                                                                       | Belén Prado-Vivar; Bernardo Gutiérrez; Francisco Cordova; Gabriel Trueba; Juan José Guadalupe; Killen Briones-Claudette; Killen Briones-Zamora; Michelle Grunauer; Ninfa Henriquez; Patricio Rojas-Silva; Paúl Cárdenas; Sully Márquez; Verónica Barragán                                                                                                                                                                                                                                                                                                                                                                                                                                                                                                                                                                                                                                                                                                                                                                                                                                                                                                                                                                                                                                                                                                                                                                                                                                                                                                                                                                  |  |
| EPI_ISL_3033082, EPI_ISL_3260092, EPI_ISL_3260095, EPI_ISL_3260109, EPI_ISL_3260111, EPI_ISL_3260112                                                                                                                                                          | Hospital Jaime Ferre - SAMCO Rafaela                                                                                                                             | Grupo de Genómica y Bioinformática del Instituto de Investigación de la Cadena Láctea CONICET-INTA on behalf of 'Proyecto Argentino Interinstitucional de genómica de SARS-CoV-2' (PAIS Consortium) | AF; Aliprandi D; Amadio; C; Eberhardt; Irazoqui; Isaia; JF; JM; MF; Pandolfi; Quaranta; Soratti R; V                                                                                                                                                                                                                                                                                                                                                                                                                                                                                                                                                                                                                                                                                                                                                                                                                                                                                                                                                                                                                                                                                                                                                                                                                                                                                                                                                                                                                                                                                                                       |  |
| EPI_ISL_2405164, EPI_ISL_2894559                                                                                                                                                                                                                              | Hospital Luis Vernaza                                                                                                                                            | Omics Sciences Laboratory                                                                                                                                                                           | Darlyn Amaya; Derly Andrade Molina; Gabriel Morey León; Juan Carlos Fernández Cadena; Rubén Armas González                                                                                                                                                                                                                                                                                                                                                                                                                                                                                                                                                                                                                                                                                                                                                                                                                                                                                                                                                                                                                                                                                                                                                                                                                                                                                                                                                                                                                                                                                                                 |  |
| EPI_ISL_2894559                                                                                                                                                                                                                                               | Hospital Margarita Maza de Juárez                                                                                                                                | Microbial Genomics Laboratory                                                                                                                                                                       | ; Alejandra García-Gasca; Alejandra Hernández-Terán; Alejandro Sánchez-Flores; Alfredo Herrera-Estrella; Alicia Ocaña-Mondragón; Andreu Comas-Garcia; Angel Gustavo Salas-Lais; Antonio Loza Román; Bernardo Martínez-Miguel; Blanca Taboada; Brenda Irasema Maldonado-Meza; Bruno Gómez-Gil; Carla Ivón Herrera-Najera; Carlos F. Arias; Celia Boukadida; Clara Esperanza Santacruz-Tinoco; Concepción Grajales-Muñiz; Consorcio Mexicano de Vigilancia Genómica (CoVIGen-Mex). Authors (in alphabetical order): Julio Elias Alvarado-Yaah; Cristóbal Cháidez-Quiróz; Célida Duque Molina; Célida Martínez- Rodríguez; Daniel Fregoso-Rueda; Daniel Lira Morales; Eduardo Becerril-Vargas; Fernando Fontove-Herrera; Fidencio Mejía-Nepomuceno; Francisco Pulido; Gloria Elena Espinosa-Ayala; Gloria María Molina-Salinas; Gloria Vazquez; Hector Esteban Paz-Juárez; Hector Montoya-Fuentes; Helen Haydee Fernanda Ramirez-Plascencia; Irvin González-López; Jean Pierre Hernández; Joel Armando Vázquez-Pérez.; Jorge Salas-Hernández; José Antonio Enciso-Moreno; José Arturo Martínez-Orozco; José Esteban Muñoz-Medina; José de Jesús Nuñez-Contreras; Juan Bautista Chale-Dzul; Julissa Enciso-Ibarra; Luis Alberto Ochoa-Carrera; Margarita Matías-Florentino; Mario Mújica-Sánchez; Marissa Perez-Garcia; María Guadalupe Santiago-Mauricio; María Guadalupe de Jesús Mireles-Rivera; Nelly Sélem-Mojica; Pavel Isa; Ricardo Ciria Merce; Ricardo Grande; Rosa María Gutiérrez Rios; Santiago Ávila-Ríos; Selene Zárate; Susana López; Verónica Mata-Haro; Victor Eduardo García-Arias; Victor Hugo Borja-Aburto |  |
| EPI_ISL_491453                                                                                                                                                                                                                                                | Hospital México                                                                                                                                                  | Incienza, Instituto Costarricense de Investigación y Enseñanza en Nutrición y Salud                                                                                                                 | Adriana Godínez & Melany Calderon; Claudio Soto-Garita; Estela Cordero; Francisco Duarte; Hebleen Brenes                                                                                                                                                                                                                                                                                                                                                                                                                                                                                                                                                                                                                                                                                                                                                                                                                                                                                                                                                                                                                                                                                                                                                                                                                                                                                                                                                                                                                                                                                                                   |  |
| EPI_ISL_480327                                                                                                                                                                                                                                                | Hospital Nacional de Niños                                                                                                                                       | Charité Virology-University of Costa Rica                                                                                                                                                           | Andrei Montero Bonilla; Andres Moreira-Soto; Cristian Pérez Corrales; Eugenia Corrales-Aguilar; Ignacio Postigo-Hidalgo; Jan Felix Drexler                                                                                                                                                                                                                                                                                                                                                                                                                                                                                                                                                                                                                                                                                                                                                                                                                                                                                                                                                                                                                                                                                                                                                                                                                                                                                                                                                                                                                                                                                 |  |
| EPI_ISL_539496                                                                                                                                                                                                                                                | Hospital Nostra Senyora de Meritxell                                                                                                                             | Instituto de Salud Carlos III                                                                                                                                                                       | A. Monzón; F. Casas; F. Fernández; I. Jiménez; Iglesias-Caballero; M. Camarero; M. Cuesta; M. González-Esguevillas; M. Molinero Calamita; M. Zaballos; P. Jiménez; S. Juliá; S. Pozo; S. Varona                                                                                                                                                                                                                                                                                                                                                                                                                                                                                                                                                                                                                                                                                                                                                                                                                                                                                                                                                                                                                                                                                                                                                                                                                                                                                                                                                                                                                            |  |
| EPI_ISL_1391104                                                                                                                                                                                                                                               | Hospital Universitari Vall d'Hebron - Vall d'Hebron Institut de Recerca                                                                                          | Hospital Universitari Vall d'Hebron - Vall d'Hebron Institut de Recerca                                                                                                                             | Andrés Antón; Ariadna Rando; Carla Castillo; Cristina Andrés; Damir Garcia-Cehic; Josep F Abril; Josep Quer; Juliana Esperalba; María Carmen Martín; Maria Gema Codina; María Piñana; Tomàs Pumarola                                                                                                                                                                                                                                                                                                                                                                                                                                                                                                                                                                                                                                                                                                                                                                                                                                                                                                                                                                                                                                                                                                                                                                                                                                                                                                                                                                                                                       |  |
| EPI_ISL_3008492                                                                                                                                                                                                                                               | Hospital Universitari i Politècnic La Fe de València                                                                                                             | SeqCOVID-SPAIN consortium/IBV(CSIC)                                                                                                                                                                 | Ana Gil Brusola; Eva González Barberá; José Luis González Hontangas and SeqCOVID-SPAIN consortium; María Dolores Gómez Ruiz; Salvador Giner Almaraz                                                                                                                                                                                                                                                                                                                                                                                                                                                                                                                                                                                                                                                                                                                                                                                                                                                                                                                                                                                                                                                                                                                                                                                                                                                                                                                                                                                                                                                                        |  |
| EPI_ISL_1120939                                                                                                                                                                                                                                               | Hospital Universitario 12 de Octubre                                                                                                                             | SeqCOVID-SPAIN consortium/IBV(CSIC)                                                                                                                                                                 | Esther Viedma; Irene Muñoz-Gallego; Jennifer Villa; Mª Dolores Folgueira and SeqCOVID-SPAIN consortiumconsortium; Rafael Delgado; Raúl Recio                                                                                                                                                                                                                                                                                                                                                                                                                                                                                                                                                                                                                                                                                                                                                                                                                                                                                                                                                                                                                                                                                                                                                                                                                                                                                                                                                                                                                                                                               |  |
| EPI_ISL_510445                                                                                                                                                                                                                                                | Hospital Universitario Virgen de las Nieves de Granada-SAS                                                                                                       | SeqCOVID-SPAIN consortium/IBV(CSIC)                                                                                                                                                                 | Irene Pedrosa Corral; José M. Navarro-Mari and SeqCOVID-SPAIN consortium; Mercedes Pérez Ruiz; Sara Sanbonmatsu Gámez                                                                                                                                                                                                                                                                                                                                                                                                                                                                                                                                                                                                                                                                                                                                                                                                                                                                                                                                                                                                                                                                                                                                                                                                                                                                                                                                                                                                                                                                                                      |  |
| EPI_ISL_2135353                                                                                                                                                                                                                                               | Hospital Universitario de La Ribera (Alzira, Valencia)                                                                                                           | SeqCOVID-SPAIN consortium/IBV(CSIC)                                                                                                                                                                 | Julia González Cantó and SeqCOVID-SPAIN consortium; Olalla Martínez Macias                                                                                                                                                                                                                                                                                                                                                                                                                                                                                                                                                                                                                                                                                                                                                                                                                                                                                                                                                                                                                                                                                                                                                                                                                                                                                                                                                                                                                                                                                                                                                 |  |
| EPI_ISL_458028                                                                                                                                                                                                                                                | Hospital for Tropical Diseases                                                                                                                                   | COVID-19 Network Investigations (CONI) Alliance                                                                                                                                                     | Akanitt Jittmittraphap; Angkana Huang; Anthony R. Jones; Arporn Wangwiwattin; Bhakbhoom Panthan; Chonticha Klungtong; Ekawat Pasomsab; Elizabeth Batty; Insee Sensors; Janjira Thaipadungpanit; Khajohn Joonsalak; Kingkan Rakmanee; Krittikorn Kumporsin; Namfon Kotanan; Nantarat Chantawat; Pornsawan Leuangwiwutwong; Stefan Fernandez; Thanat Koohakorn; Theerawat Wattanachockchai; Wasun Chantrattita; Weena Janwitthayanant; Wudthichai Manasatienkij                                                                                                                                                                                                                                                                                                                                                                                                                                                                                                                                                                                                                                                                                                                                                                                                                                                                                                                                                                                                                                                                                                                                                              |  |
| EPI_ISL_2357830                                                                                                                                                                                                                                               | Hospital of Southern Norway - Kristiansand, Department of Medical Microbiology                                                                                   | Norwegian Institute of Public Health, Department of Virology                                                                                                                                        | Atiya R Ali; Debech Nadia; Engebretsen Serina Beate; Garcia Llorente Ignacio; Hilde Elshaug; Hilde Vollan; Jon Bråte; Kamilla Heddeland Instefjord; Karoline Bragstad; Kathrine Stene-Johansen; Marie Paulsen Madsen; Olav Hungnes; Pedersen Benedikte Nevjen; Rasmus Riis Kopperud                                                                                                                                                                                                                                                                                                                                                                                                                                                                                                                                                                                                                                                                                                                                                                                                                                                                                                                                                                                                                                                                                                                                                                                                                                                                                                                                        |  |
| EPI_ISL_3023084                                                                                                                                                                                                                                               | Hospital of the University of Pennsylvania Molecular Pathology Lab                                                                                               | Bushman Lab - University of Pennsylvania                                                                                                                                                            | Aoife M. Roche; Arupa Ganguly; Ayannah S. Fitzgerald; Brendan Kelly; Jevon Graham-Wooten; John K. Everett; Kyle Rodino; Layla A. Khatib; Mike Feldman; Ronald G. Collman and Frederic Bushan; Samantha A. Whiteside; Scott Sherrill-Mix; Shantan Reddy; Young Hwang                                                                                                                                                                                                                                                                                                                                                                                                                                                                                                                                                                                                                                                                                                                                                                                                                                                                                                                                                                                                                                                                                                                                                                                                                                                                                                                                                        |  |
| EPI_ISL_2221072                                                                                                                                                                                                                                               | Houston Methodist Hospital                                                                                                                                       | Houston Methodist Hospital                                                                                                                                                                          | Ilya J. Finkelstein; James J. Davis; Jessica Cambric; Jimmy Gollihar; Kristina Reppond; Layne Pruitt; Madison N. Shyer; Marcus Nguyen; Matthew Ojeda Saavedra; Paul A. Christensen; Prasanti Yerramilli; Randall J. Olsen; Robert Olson; Ryan Gadd; S. Wesley Long; Sishir Subedi; and                                                                                                                                                                                                                                                                                                                                                                                                                                                                                                                                                                                                                                                                                                                                                                                                                                                                                                                                                                                                                                                                                                                                                                                                                                                                                                                                     |  |

|                                                                                                                                                                                                                                              |                                                                                                     |                                                                                                                                                                                                                                                                                                                 |                                                                                                                                                                                                                                                                                                                                                                                                                                                                                                                                                                    |
|----------------------------------------------------------------------------------------------------------------------------------------------------------------------------------------------------------------------------------------------|-----------------------------------------------------------------------------------------------------|-----------------------------------------------------------------------------------------------------------------------------------------------------------------------------------------------------------------------------------------------------------------------------------------------------------------|--------------------------------------------------------------------------------------------------------------------------------------------------------------------------------------------------------------------------------------------------------------------------------------------------------------------------------------------------------------------------------------------------------------------------------------------------------------------------------------------------------------------------------------------------------------------|
| EPI_ISL_2674799                                                                                                                                                                                                                              | Hrvatski zavod za javno zdravstvo                                                                   | Hrvatski zavod za javno zdravstvo                                                                                                                                                                                                                                                                               | James M. Musser                                                                                                                                                                                                                                                                                                                                                                                                                                                                                                                                                    |
| EPI_ISL_2466657                                                                                                                                                                                                                              | Human Genetic Research Center, Kawsar Biotech Company                                               | Kawsar Biotech Company                                                                                                                                                                                                                                                                                          | Irena Tabain; Ivana Ferenčak                                                                                                                                                                                                                                                                                                                                                                                                                                                                                                                                       |
| EPI_ISL_526224                                                                                                                                                                                                                               | Hungarian Defence Forces Military Medical Centre                                                    | National Laboratory of Virology, Szentágothai Research Centre                                                                                                                                                                                                                                                   | Abbasalipour, M.; Azadmanesh, K.; Chamran Hospital, C.; Khosravi, M.A.; National Institute for Medical Research Development, N.; Zeinali, R.; Zeinali, S.                                                                                                                                                                                                                                                                                                                                                                                                          |
| EPI_ISL_940539                                                                                                                                                                                                                               | Hôpital Bichat Claude Bernard, Laboratoire de Virologie                                             | IAME UMR1137 Inserm, Université de Paris, Hôpital Bichat                                                                                                                                                                                                                                                        | Balázs Somogyi; Bálint Eszenyi; Endre Gábor Tóth; Ferenc Jakab; Gábor Kemenesi                                                                                                                                                                                                                                                                                                                                                                                                                                                                                     |
| EPI_ISL_2228879                                                                                                                                                                                                                              | Hôpital Cochin                                                                                      | Department of Virology, Henri Mondor University Hospital, Assistance Publique Hôpitaux de Paris, Université Paris-Est Créteil, INSERM U955                                                                                                                                                                      | Alexandre Storto; Amélie Recoing; Antoine Bridier-Nahmias; Benoit Visseaux; Charlotte Charpentier; Diane Descamps; Gilles Collin; Lena Daniel; Mélanie Bertine; Nadhira Houhou-Fidouh; Quentin Le Hingrat; Siham Hamri                                                                                                                                                                                                                                                                                                                                             |
| EPI_ISL_961667                                                                                                                                                                                                                               | Hôpital Georges L. Dumont                                                                           | National Microbiology Laboratory (NML)                                                                                                                                                                                                                                                                          | Alexandre Soulier; Christophe Rodriguez; Elisabeth Trawinski; Guillaume Gricourt; Jean-Michel Pawlowsky; Melissa N'Debi; Slim Fourati; Vanessa Demontant                                                                                                                                                                                                                                                                                                                                                                                                           |
| EPI_ISL_535716                                                                                                                                                                                                                               | Hôpital de Verdun                                                                                   | Laboratoire de santé publique du Québec                                                                                                                                                                                                                                                                         | Anna Majer; Anneliese Landgraff; CanCOGeN's metadata curation team; Darian Hole; Elsie Grudeski; Gary Van Domselaar; Grace Seo; Guillaume Desnoyers; Jennifer Tanner; Kirsten Biggar; Madison Chapel; Morag Graham; Natalie Knox; Nathalie Bastien; Philip Mabon; Public Health Agency of Canada CanCOGeN team; Rhiannon Huzarewich; Richard Garceau; Russell Mandes; Shari Tyson; Timothy Booth; Yan Li                                                                                                                                                           |
| EPI_ISL_3127986                                                                                                                                                                                                                              | IA State Hygienic Laboratory                                                                        | Centers for Disease Control and Prevention Division of Viral Diseases, Pathogen Discovery                                                                                                                                                                                                                       | Guillaume Bourque; Ioannis Ragoussis; Jesse Shapiro; Mark Lathrop and Michel Roger on behalf of the CoVSeQ research group; Sandrine Moreira                                                                                                                                                                                                                                                                                                                                                                                                                        |
| EPI_ISL_1094329                                                                                                                                                                                                                              | IA State Hygienic Laboratory                                                                        | Respiratory Viruses Branch, Division of Viral Diseases, Centers for Disease Control and Prevention                                                                                                                                                                                                              | Alex Burgin; Ben L. Rambo-Martin; Clinton R. Paden; Dakota Howard; Dave Wentworth; Dhvani Batra; Jasmine Padilla; Justin Lee; Krista Queen; Kristen Knipe; Kristine Lacek; Mark Burroughs; Matthew Schmerer; Meghan Bentz; Mili Sheth; Peter Cook; Sam Shepard; Sarah Nobles; Suxiang Tong; Vivien Dugan; Yvette Unoarumhi                                                                                                                                                                                                                                         |
| EPI_ISL_1704103, EPI_ISL_3533062                                                                                                                                                                                                             | ICMR-National Institute of Virology - INSACOG                                                       | NIV Influenza                                                                                                                                                                                                                                                                                                   | Anna Montmayeur; Anna Uehara; Ben L. Rambo-Martin; Clinton R. Paden; Dhvani Batra; Haibin Wang; Jasmine Padilla; Jing Zhang; Justin Lee; Krista Queen; Lori Rowe; Mark Burroughs; Mili Sheth; Peter W. Cook; Rachel Marine; Sarah Nobles; Suxiang Tong; Yan Li; Ying Tao                                                                                                                                                                                                                                                                                           |
| EPI_ISL_355289                                                                                                                                                                                                                               | ID Bureau of Laboratories                                                                           | Centers for Disease Control and Prevention Division of Viral Diseases, Pathogen Discovery                                                                                                                                                                                                                       | Dr. Varsha Potdar; Dr. Varsha Potdar and NIC Team                                                                                                                                                                                                                                                                                                                                                                                                                                                                                                                  |
| EPI_ISL_2811914                                                                                                                                                                                                                              | IDF medical corps                                                                                   | Central Virology Laboratory, Ministry of Health                                                                                                                                                                                                                                                                 | Alex Burgin; Ben Rambo-Martin; Clinton Paden; Dakota Howard; Dave Wentworth; Dhvani Batra; Jasmine Padilla; Justin Lee; Krista Queen; Kristen Knipe; Kristine Lacek; Mark Burroughs; Matthew Schmerer; Meghan Bentz; Mili Sheth; Peter Cook; Sam Shepard; Sarah Nobles; Suxiang Tong; Vivien Dugan; Yvette Unoarumhi                                                                                                                                                                                                                                               |
| EPI_ISL_2444803, EPI_ISL_2444813, EPI_ISL_2444814, EPI_ISL_2444815, EPI_ISL_2444817, EPI_ISL_2444819, EPI_ISL_2444820, EPI_ISL_2444821, EPI_ISL_2444822, EPI_ISL_2444824                                                                     | see above                                                                                           | Amos Adler; Efrat Bucci; Ella Mendelson; Michal Mandelboim; Moran Shwartswort-Cohen; Neta S. Zuckerman; Noam Protter; Oran Erster; Orna Mor; Saar Burstein                                                                                                                                                      |                                                                                                                                                                                                                                                                                                                                                                                                                                                                                                                                                                    |
| EPI_ISL_1225990                                                                                                                                                                                                                              | IN State Department of Health Laboratory Services                                                   | Genomics and Discovery, Respiratory Viruses Branch, Division of Viral Diseases, Centers for Disease Control and Prevention                                                                                                                                                                                      | Adriana Valenzuela; Alejandra Rojas; Chyntia Diaz; Eva Nara; Fatima Cardozo; Florencia del Puerto; Joel Ortiz; Jonas Fernandez; Laura Franco; Laura Mendoza; Leticia Rojas; Magaly Martinez; Maria Eugenia Galeano.                                                                                                                                                                                                                                                                                                                                                |
| EPI_ISL_1577798, EPI_ISL_1577815, EPI_ISL_2628194, EPI_ISL_2628307                                                                                                                                                                           | INHRR                                                                                               | Laboratorio de Virologia Molecular                                                                                                                                                                                                                                                                              | Anna Montmayeur; Anna Uehara; Ben L. Rambo-Martin; Clinton R. Paden; Dhvani Batra; Haibin Wang; Jasmine Padilla; Justin Lee; Krista Queen; Kristen Knipe; Kristine Lacek; Lori Rowe; Mark Burroughs; Matthew Schmerer; Mili Sheth; Peter W. Cook; Rachel Marine; Sam Shepard; Sarah Nobles; Shoshona Le; Suxiang Tong; Yan Li; Ying Tao                                                                                                                                                                                                                            |
| EPI_ISL_410546                                                                                                                                                                                                                               | INMI Lazzaro Spallanzani IRCCS                                                                      | Laboratory of Virology, INMI Lazzaro Spallanzani IRCCS                                                                                                                                                                                                                                                          | Aguilar M; Alarcon V; Carmen L Loureiro; CoViVen Group; D Angelo P; Delgado M; Domingo J Garzaro; Esmeralda Vizzi; Flor H Pujol; Garzaro D; Héctor R Rangel; Jaspe RC; José Luis Zambrano; Lieska Rodríguez; Loureiro CL; Mariana Hidalgo; Pierina D ´Angelo; Pujol FH; Rangel HR; Rodriguez L; Rossana C Jaspe; Victor Alarcón; Yoneira Sulbaran; Zambrano JL; Zoila Moros                                                                                                                                                                                        |
| EPI_ISL_3459414                                                                                                                                                                                                                              | INS                                                                                                 | Instituto Nacional de Salud                                                                                                                                                                                                                                                                                     | Barbara Bartolini; Cesare E. M. Gruber; Concetta Castilletti; Eleonora Lalle; Emanuela Giombini; Emanuele Nicastri; Fabrizio Carletti; Francesca Colavita; Francesco Messina; Giuseppe Ippolito.; Maria R. Capobianchi; Martina Rueca                                                                                                                                                                                                                                                                                                                              |
| EPI_ISL_421499                                                                                                                                                                                                                               | INSA                                                                                                | Instituto Nacional de Saude (INSA)                                                                                                                                                                                                                                                                              | Carlos Franco-Muñoz; Carmen Osorio; Diana Malo; Diego A. Álvarez-Díaz; Diego Andrés Prada; Gerardo Santamaría; Hector Alejandro Ruiz-Moreno; Jhonattan Reales-González; Jorge Rivera; Juan Camilo Martinez; Julian Naizaque; Katherine Laiton-Donato; Lisseth Pardo; Magdalena Wiesner; Marcela Mercado-Reyes; Maria T. Herrera-Sepúlveda; Marta Lopez Blanco; Martha Lucia Ospina Martinez; Paola Rojas; Sergio Gomez; Sheryll Corchuelo; Ángela Alarcon Cruz                                                                                                     |
| EPI_ISL_2878662                                                                                                                                                                                                                              | INSACOG Surveillance                                                                                | INSACOG at CSIR Institute of Genomics and Integrative Biology                                                                                                                                                                                                                                                   | Guומר et al<br>INSACOG                                                                                                                                                                                                                                                                                                                                                                                                                                                                                                                                             |
| EPI_ISL_3021944                                                                                                                                                                                                                              | INSACOG-MANIPUR                                                                                     | National Institute of Biomedical Genomics - INSACOG                                                                                                                                                                                                                                                             | Arindam Maitra; Kh. Ranjana Devi; L. Shivadutta Singh; Nidhan Kumar Biswas; R.K.Manojkumar Singh; Saumitra Das; Sreedhar Chinnaswamy                                                                                                                                                                                                                                                                                                                                                                                                                               |
| EPI_ISL_1419106                                                                                                                                                                                                                              | INSACOG-Mizoram                                                                                     | National Institute of Biomedical Genomics - INSACOG                                                                                                                                                                                                                                                             | Arindam Maitra; Gracy Laldinmawii; N Senthil Kumar; Nidhan Kumar Biswas; Saumitra Das; Sreedhar Chinnaswamy; Swagnik Roy                                                                                                                                                                                                                                                                                                                                                                                                                                           |
| EPI_ISL_3019017                                                                                                                                                                                                                              | INSACOG-Sikkim                                                                                      | National Institute of Biomedical Genomics - INSACOG                                                                                                                                                                                                                                                             | Arindam Maitra; Kaden Zangmu Bhutia; Nidhan Kumar Biswas; Saumitra Das; Sreedhar Chinnaswamy Tshering Ongmu Bhutia; Tara D Sharma                                                                                                                                                                                                                                                                                                                                                                                                                                  |
| EPI_ISL_1419175, EPI_ISL_1419280, EPI_ISL_1419495                                                                                                                                                                                            | INSACOG-WB                                                                                          | National Institute of Biomedical Genomics - INSACOG                                                                                                                                                                                                                                                             | Ajay Chakraborti; Arindam Maitra; Bhaswati Bandyopadhyay; Nidhan Kumar Biswas; Saumitra Das; Sreedhar Chinnaswamy; Tamal Ghosh                                                                                                                                                                                                                                                                                                                                                                                                                                     |
| EPI_ISL_3246108, EPI_ISL_3246116                                                                                                                                                                                                             | INSIDE DIAGNÓSTICOS                                                                                 | Instituto Butantan                                                                                                                                                                                                                                                                                              | Antonio Jorge Martins; Claudia Renata dos Santos Barros; David Schlesinger; Debora Botequiao Moretti; Dimas Tadeu Covas; Elaine Cristina Marqueze; Elaine Vieira Santos; Evandra Strazza Rodrigues; Heidge Fukumasu; Jayme Augusto de Souza-Neto; José Salvatore Meister Patané; Luiz Alcantara; Luiz Lehmann Coutinho; Maria Carolina Elias; Maurício Lacerda Nogueira; Rafael dos Santos Bezerra; Raul Machado Neto; Rejane Maria Tommasini Grotto; Ricardo Haddad; Sandra Coccuzzo Sampaio Vessoni; Simone Kashima; Svetoslav Nanev Slavov; Vincent Louis Viala |
| EPI_ISL_2672993                                                                                                                                                                                                                              | INSP, Bamako                                                                                        | Malaria Research and Training Center-Parasito                                                                                                                                                                                                                                                                   | Abdoulaye Djimde; Amadou Daou; Antoine Dara; Demba Koita; Ibrehima Guindo                                                                                                                                                                                                                                                                                                                                                                                                                                                                                          |
| EPI_ISL_826818                                                                                                                                                                                                                               | INSPI-CRN DE INFLUENZA Y OTROS VIRUS RESPIRATORIOS                                                  | Instituto de Salud Publica de Chile                                                                                                                                                                                                                                                                             | Alfredo Bruno; Andres Castillo; Barbara Parra; Domenica de Mora; Gisselle Barra; Jaime Lagos; Javier Tognarelli; Jimmy Garcez; Jorge Fernandez; Loredana Arata; Manuel Gonzalez; Martiza Olmedo; Michelle Paez; Patricia Bustos; Rodrigo Fasce; Solon Narvaez                                                                                                                                                                                                                                                                                                      |
| EPI_ISL_2488753, EPI_ISL_2757585, EPI_ISL_2757587, EPI_ISL_2757633, EPI_ISL_2895670, EPI_ISL_2988459, EPI_ISL_2988467, EPI_ISL_2988472, EPI_ISL_2988484, EPI_ISL_2988487, EPI_ISL_2988546, EPI_ISL_3010462, EPI_ISL_3274402, EPI_ISL_3274428 | see above                                                                                           | NIC-INSPI                                                                                                                                                                                                                                                                                                       | Alfredo Bruno; Domenica de Mora.; Jimmy Garcés; Johanna Laines; Lizbeth Patiño; Manuel Gonzalez; Maritza Olmedo; Michelle Páez                                                                                                                                                                                                                                                                                                                                                                                                                                     |
| EPI_ISL_3845830                                                                                                                                                                                                                              | INTERLAB                                                                                            | Omics Sciences Laboratory                                                                                                                                                                                                                                                                                       | Darlyn Amaya; Derly Andrade Molina; Gabriel Morey León; Juan Carlos Fernández Cadena; Rubén Armas González                                                                                                                                                                                                                                                                                                                                                                                                                                                         |
| EPI_ISL_751445                                                                                                                                                                                                                               | IRCCS Sacro Cuore Don Calabria Hospital, Department of Infectious, Tropical Diseases & Microbiology | University of Verona, Department of Biotechnology                                                                                                                                                                                                                                                               | Antonio Mori; Chiara Degli Esposti; Chiara Piubelli; Cristina Beltrami; Elena Pomari; Emanuela Cosentino; Giulia Lopatriello; Luca Marcolungo; Massimo Delledonne; Michela Deiana                                                                                                                                                                                                                                                                                                                                                                                  |
| EPI_ISL_1630261                                                                                                                                                                                                                              | IRSESSEF                                                                                            | Abbott                                                                                                                                                                                                                                                                                                          | Adbou Padane; Ambroise Ahouidi; Aminata Dia; Aminata Mboup; Ana Olivo; Anna julienne selbe Ndiaye; Barbara Harris; Cyrille Diedhiou; Gavin Cloherty; Mary Rodgers; Moustapha Mbow; Nafissatou Leye; Ndeye Diabou Diagne; Papa Alassane Diaw; Souleymane Mboup; Todd Meyer                                                                                                                                                                                                                                                                                          |
| EPI_ISL_2015111                                                                                                                                                                                                                              | IU-Cerrahpasa, Cerrahpasa School of Medicine, COVID-19 Lab                                          | IU-Cerrahpasa, Cerrahpasa School of Medicine, COVID-19 Lab                                                                                                                                                                                                                                                      | Kenan Midilli; Mert Kuskucu; Yesim Tuyji Tok                                                                                                                                                                                                                                                                                                                                                                                                                                                                                                                       |
| EPI_ISL_2628209, EPI_ISL_2628299, EPI_ISL_2628300, EPI_ISL_2628302, EPI_ISL_2628305, EPI_ISL_2628308, EPI_ISL_2628310, EPI_ISL_3298687                                                                                                       | see above                                                                                           | IVIC                                                                                                                                                                                                                                                                                                            | Carmen L Loureiro; CoViMol Group; CoViVen Group; Domingo J Garzaro; Esmeralda Vizzi; Flor H Pujol; Héctor R Rangel; José Luis Zambrano; Lieska Rodríguez; Mariana Hidalgo; Pierina D ´Angelo; Rossana C Jaspe; Victor Alarcón; Yoneira Sulbaran; Zoila Moros                                                                                                                                                                                                                                                                                                       |
| EPI_ISL_3272471                                                                                                                                                                                                                              | Idaho Bureau of Laboratories                                                                        | Laboratorio de Virologia Molecular                                                                                                                                                                                                                                                                              | Aimee Ceniseros; Cheri Lamb McFarlane; Christian Loera; Dr. Christopher Ball; Emily Bartlett; James Razor; Matthew Burns; Ying Pei                                                                                                                                                                                                                                                                                                                                                                                                                                 |
| EPI_ISL_632881, EPI_ISL_2095700                                                                                                                                                                                                              | Idaho Bureau of Laboratories                                                                        | Boise VA Medical Center, PALMS                                                                                                                                                                                                                                                                                  | Christopher Ball; Darrell Dinwiddie; Daryl Domman; Kurt Schwalm; Matthew Burns; Robert Voermans; Valerie Morley                                                                                                                                                                                                                                                                                                                                                                                                                                                    |
| EPI_ISL_2090634, EPI_ISL_3064181, EPI_ISL_3064205, EPI_ISL_3756692                                                                                                                                                                           | Idaho Bureau of Laboratories                                                                        | Center for Global Health, University of New Mexico Health Sciences Center                                                                                                                                                                                                                                       | "R. Beukelman; Aimee Ceniseros; Christian Loera; Christopher Ball; Christopher Ball"; Matthew Charles Burns; R. Beukelman; Robert L. Voermans                                                                                                                                                                                                                                                                                                                                                                                                                      |
| EPI_ISL_2801167                                                                                                                                                                                                                              | Illinois Department of Public Health                                                                | Idaho Bureau of Laboratories                                                                                                                                                                                                                                                                                    | Keith Gagnon                                                                                                                                                                                                                                                                                                                                                                                                                                                                                                                                                       |
| EPI_ISL_2800760                                                                                                                                                                                                                              | Illinois Department of Public Health                                                                | Gagnon Lab, Southern Illinois University                                                                                                                                                                                                                                                                        | Ira Heimler; Joel Price; Vineet K. Dhiman                                                                                                                                                                                                                                                                                                                                                                                                                                                                                                                          |
| EPI_ISL_1063798                                                                                                                                                                                                                              | Immunogenomics lab, Institute of Life Sciences, Bhubaneswar                                         | Illinois Department of Public Health - Chicago Lab                                                                                                                                                                                                                                                              | Ajay Parida; Amol M. Kanampalliwar; Arup Ghosh; Atimukta Jha; INSACOG Consortium; Kirtal Hansdah; Punit Prasad; Rajeeb Swain; Rupesh Dash; Safal Walia; Shifu Aggarwal; Sunil K. Raghav                                                                                                                                                                                                                                                                                                                                                                            |
| EPI_ISL_1517401, EPI_ISL_1517429                                                                                                                                                                                                             | Immunogenomics lab, Institute of Life Sciences, Bhubaneswar                                         | Immunogenomics lab, Institute of Life Sciences, Bhubaneswar                                                                                                                                                                                                                                                     | Barboza-Arguedas E & Blanco-Delgado C; Cristian Peréz-Corrales; Cristian Peréz-Corrales & Valeria Peralta-Barquero                                                                                                                                                                                                                                                                                                                                                                                                                                                 |
| EPI_ISL_476704                                                                                                                                                                                                                               | Incienza, Instituto Costarricense de Investigación y Enseñanza en Nutrición y Salud                 | Incienza, Instituto Costarricense de Investigación y Enseñanza en Nutrición y Salud                                                                                                                                                                                                                             | Alberto Paniz-Mondolfi; Ana S. Gonzalez-Reiche; Angelica Rico; Anibal A. Teherán; Carolina Florez; Carolina Hernández; Emilia Mia Sordillo; Esther C. Barros; Harm van Bakel; Jesús E. Jaimes; Juan David Ramírez; Lisseth Pardo; Lourdes Delgado; Luis Perez-Garcia; Marina Muñoz; Matthew M. Hernandez; Sergio Gomez; Viviana Simon                                                                                                                                                                                                                              |
| EPI_ISL_647986                                                                                                                                                                                                                               | Incubadora Venezolana de Ciencia, Venezuela                                                         | Incubadora Venezolana de Ciencia, Venezuela / Instituto Nacional de Salud, Bogotá, Colombia / Grupo de Investigaciones Microbiológicas-UR (GIMUR), Departamento de Biología, Facultad de Ciencias Naturales, Universidad del Rosario, Bogotá, Colombia / Icahn School of Medicine at Mount Sinai, New York, USA | Anna Montmayeur; Anna Uehara; Brian Lynch; Clinton R. Paden; Haibin Wang; Jing Zhang; Krista Queen; Rachel Marine; Suxiang Tong; Yan Li; Ying Tao                                                                                                                                                                                                                                                                                                                                                                                                                  |
| EPI_ISL_3540049, EPI_ISL_3540059                                                                                                                                                                                                             | Indiana State Department of Health                                                                  | Pathogen Discovery, Respiratory Viruses Branch, Division of Viral Diseases, Centers for Disease Control and Prevention                                                                                                                                                                                          | D. Fathmath Nazla Rafeeq; Mr. Ibrahim Nishan Ahmed; Ms. Aishath Shuhudha; Ms. Aminath Nazfa; Ms. Fathimath Zimna                                                                                                                                                                                                                                                                                                                                                                                                                                                   |
| EPI_ISL_3540049, EPI_ISL_3540059                                                                                                                                                                                                             | Indira Gandhi Memorial Hospital                                                                     | Indiar Gandhi Memorial Hospital                                                                                                                                                                                                                                                                                 |                                                                                                                                                                                                                                                                                                                                                                                                                                                                                                                                                                    |

|                                                                                                                                                                                                                        |                                                                                                                                                                                |                                                                                                                                                    |                                                                                                                                                                                                                                                                                                                                                                                                                                                                                                                                                                       |
|------------------------------------------------------------------------------------------------------------------------------------------------------------------------------------------------------------------------|--------------------------------------------------------------------------------------------------------------------------------------------------------------------------------|----------------------------------------------------------------------------------------------------------------------------------------------------|-----------------------------------------------------------------------------------------------------------------------------------------------------------------------------------------------------------------------------------------------------------------------------------------------------------------------------------------------------------------------------------------------------------------------------------------------------------------------------------------------------------------------------------------------------------------------|
| EPI_ISL_3540060,<br>EPI_ISL_3540070,<br>EPI_ISL_3540079,<br>EPI_ISL_3540080                                                                                                                                            | Indira Gandhi Memorial Hospital                                                                                                                                                | Indira Gandhi Memorial Hospital                                                                                                                    | Dr. Milza Abdul Muhsin; Mr. Ibrahim Nishan Ahmed; Ms. Aishath Shuhudha; Ms. Aminath Nazfa; Ms. Fathimath Zimna                                                                                                                                                                                                                                                                                                                                                                                                                                                        |
| EPI_ISL_3275174,<br>EPI_ISL_3275384,<br>EPI_ISL_3275385,<br>EPI_ISL_3452722,<br>EPI_ISL_3452723,<br>EPI_ISL_3452727                                                                                                    |                                                                                                                                                                                |                                                                                                                                                    |                                                                                                                                                                                                                                                                                                                                                                                                                                                                                                                                                                       |
| EPI_ISL_3000158,<br>EPI_ISL_3003644                                                                                                                                                                                    | Infection Prevention & Control Unit                                                                                                                                            | Central Virology laboratory, Ministry of Health                                                                                                    | Asaf Biber; Danis Sofer; Efrat Bucris; Ella Mendelson; Gili Regev-Yochay; Ilana Tal; Michal Mandelboim; Miki Goldenfeld; Neta Zuckerman; Orna Mor; Sabrina Hason; Sharon Amit; Shiraz Gefen-Halevi                                                                                                                                                                                                                                                                                                                                                                    |
| EPI_ISL_596454                                                                                                                                                                                                         | Infectious Disease and Tropical Medicine Research Center, Resistant Tuberculosis Institute, Zahedan University of Medical Sciences, Zahedan, Iran.                             | Genetics Research Center, University of Social Welfare and Rehabilitation Sciences                                                                 | Ali Jafarpour; Azam Ghaziasadi; Ebrahim Kord; Hossein Najmabadi; Khadijeh Jalalvand; Kimia Kahrizi; Marzieh Mohseni; Seyed Mohammad Hashemi-Shahri; Seyed Mohammad Jazayeri; Seyedeh elham Mortazavi; Zohreh Fattahi                                                                                                                                                                                                                                                                                                                                                  |
| EPI_ISL_884351                                                                                                                                                                                                         | Infectious Diseases, Quest Diagnostics                                                                                                                                         | Infectious Diseases, Quest Diagnostics                                                                                                             | Anderson, B.; Bernstein; D.F.; Gerasimova, A.; Hua, M.; K.E.; Kagan; L.E.; Lacbawan, F.; Liu, Y.; Livingston; Owen, R.; R.M.; Rosenthal; S.H.; Shalhout                                                                                                                                                                                                                                                                                                                                                                                                               |
| EPI_ISL_2089321,<br>EPI_ISL_2089449,<br>EPI_ISL_2186374,<br>EPI_ISL_2283374,<br>EPI_ISL_3754621                                                                                                                        | Infinity Biologix                                                                                                                                                              | Centers for Disease Control and Prevention Division of Viral Diseases, Pathogen Discovery                                                          | Adrian Paskey; Benjamin Rambo-Martin; Chirayao Goswami; Christian Bixby; Christopher Gulvick; Clinton Paden; Clinton R. Paden; Dakota Howard; Darlene Wagner; Dhwani Batra; Duncan MacCannell; Jason Caravas; Jonathan Schultz; Kara Moser; Matthew Schmerer; Peter Cook; Peter W. Cook; Robin Grimwood; Russ Hager; Scott Sammons; Shatavia Morrison; Yihe Wang; Yvette Unoarumhi                                                                                                                                                                                    |
| EPI_ISL_2281233,<br>EPI_ISL_2281238,<br>EPI_ISL_2281248                                                                                                                                                                | Insitut Pasteur Bangui                                                                                                                                                         | Institut Pasteur de Dakar                                                                                                                          | Amadou Alpha Sall; Amadou Diallo; Benjamin Selekon; Cheikh Loucoubar; Christian Malaka; Mamadou Diop; Marie-Astrid Vernet; Moussa Moïse Diagne; Ndack Ndiaye; Ndongo Dia; Ousmane Faye; Rivalyn Nakoune Yandoko; Safietou Sankhe; Sandra Garba Ouangole                                                                                                                                                                                                                                                                                                               |
| EPI_ISL_1913213                                                                                                                                                                                                        | Institut National d'Hygiène                                                                                                                                                    | Laboratoire de Biotechnologie                                                                                                                      | Abdelmunim Essabbar; Fatima El Falaki; Hicham Oumzil; Lahcen Belyamani and Azeddine Ibrahim; Mohamed Rhajaoui; Mouna Ouadghiri; Saïd Amzazi; Tarik Aanniz                                                                                                                                                                                                                                                                                                                                                                                                             |
| EPI_ISL_1439647                                                                                                                                                                                                        | Institut National d'Hygiène                                                                                                                                                    | Unité Mixte Internationale TransVIHMI (UMI 233 IRD - U1175 INSERM - Université de Montpellier) IRD (Institut de recherche pour le développement)   | Abla A. KONOU; Adodo SADJI; Ahidjo AYOUBA; Akoélé SILIADIN; Alassane OURO-MEDEL; Amivi EHLAN; Améyo DORKENOO; Anoumou DAGNRA; Christelle BUTEL; Déléma MABA; Eric DELAPORTE; Issaka Maman; Kokou TEGUENI; Laetitia SERRANO; Martine PEETERS; Messanh DOUFFAN; Mireille PRINCE-DAVID; Mounerou SALOU; Sidonie A.M.KAGNISSODE; Sika DOSSIM; Wembo A. HALATOKO                                                                                                                                                                                                           |
| EPI_ISL_1415428                                                                                                                                                                                                        | Institut National d'hygiène                                                                                                                                                    | "Unité Mixte Internationale TransVIHMI (UMI 233 IRD - U1175 INSERM - Université de Montpellier) IRD (Institut de recherche pour le développement)" | Abla A. KONOU; Adodo SADJI; Ahidjo AYOUBA; Akoélé SILIADIN; Alassane OURO-MEDEL; Amivi EHLAN; Améyo DORKENOO; Anoumou DAGNRA; Christelle BUTEL; Déléma MABA; Eric DELAPORTE; Issaka Maman; Kokou TEGUENI; Laetitia SERRANO; Martine PEETERS; Messanh DOUFFAN; Mireille PRINCE-DAVID; Mounerou SALOU; Sidonie A.M.KAGNISSODE; Sika DOSSIM; Wembo A. HALATOKO                                                                                                                                                                                                           |
| EPI_ISL_1508953,<br>EPI_ISL_1508958                                                                                                                                                                                    | Institut National d'hygiène                                                                                                                                                    | Unité Mixte Internationale TransVIHMI (UMI 233 IRD - U1175 INSERM - Université de Montpellier) IRD (Institut de recherche pour le développement)   | Abla A. KONOU; Adodo SADJI; Ahidjo AYOUBA; Akoélé SILIADIN; Alassane OURO-MEDEL; Amivi EHLAN; Améyo DORKENOO; Anoumou DAGNRA; Christelle BUTEL; Déléma MABA; Eric DELAPORTE; Issaka Maman; Kokou TEGUENI; Koku AGBODEKA; Laetitia SERRANO; Martine PEETERS; Messanh DOUFFAN; Mireille PRINCE-DAVID; Mounerou SALOU; Sidonie A.M.KAGNISSODE; Sika DOSSIM; Wembo A. HALATOKO                                                                                                                                                                                            |
| EPI_ISL_418206,<br>EPI_ISL_418208,<br>EPI_ISL_481235                                                                                                                                                                   | Institut Pasteur Dakar                                                                                                                                                         | Institut Pasteur de Dakar                                                                                                                          | Amadou Alpha Sall; Amadou Alpha Sall.; Mamadou Diop; Mamadou Malado Jallow; Marie Henriette Dior Ndione; Moussa Moïse Diagne; Ndongo Dia; Ousmane Faye; Safietou Sanke                                                                                                                                                                                                                                                                                                                                                                                                |
| EPI_ISL_498238                                                                                                                                                                                                         | Institut Pasteur de Dakar                                                                                                                                                      | Institut Pasteur de Dakar                                                                                                                          | Amadou Alpha Sall.; Mamadou Diop; Mamadou Malado Jallow; Marie Henriette Dior Ndione; Moussa Moïse Diagne; Ndongo Dia; Ousmane Faye; Safietou Sankhe Mbengue                                                                                                                                                                                                                                                                                                                                                                                                          |
| EPI_ISL_2245857,<br>EPI_ISL_2245876,<br>EPI_ISL_2245882,<br>EPI_ISL_2245977                                                                                                                                            | Institut Pasteur de Guinée                                                                                                                                                     | Institut Pateur de Dakar                                                                                                                           | Dia Ndongo; Diagne Moussa Moïse; Diallo Amadou; Diop Mamadou; Faye Ousmane; Grayo Solene; Loucoubar Cheikh; Maimouna Mbanne; Mbengue Safietou Sankhe; Mohamed Kane; Ndiaye Ndack; Sall Amadou Alpha; Tordo Noel                                                                                                                                                                                                                                                                                                                                                       |
| EPI_ISL_613421,<br>EPI_ISL_613425,<br>EPI_ISL_613446                                                                                                                                                                   | Institut Pasteur de la Guadeloupe                                                                                                                                              | Institut Pasteur de la Guadeloupe                                                                                                                  | Angela Brisebarre; Antoine Talarmin; Camille Capel; Etienne Simon-Lorière; Marion Barbet; Maud Vanpeene; Méline Bizard; Stéphanie Guyomard; Sylvie Behillili; Sylvie van der Werf; Sébastien Breurec; Vincent Enouf                                                                                                                                                                                                                                                                                                                                                   |
| EPI_ISL_955166,<br>EPI_ISL_3163947                                                                                                                                                                                     | Institute for Biocides and Medical Ecology                                                                                                                                     | Institute of microbiology and Immunology, Faculty of Medicine, University of Belgrade                                                              | Banko A.; Cupic M.; Jankovic, M.; Jovanovic, T.; Knezevic, A.; Lazarevic I.; Milicevic, O.; Miljanovic D.; Sekler, M.; Tesovic, B.; Vidanovic, D.                                                                                                                                                                                                                                                                                                                                                                                                                     |
| EPI_ISL_490092, EPI_ISL_718301, EPI_ISL_1696746, EPI_ISL_2091000, EPI_ISL_2684545, EPI_ISL_2685841, EPI_ISL_2815375                                                                                                    | see above                                                                                                                                                                      | Institute for Medical Research, Infectious Disease Research Centre, National Institutes of Health, Ministry of Health Malaysia                     | Azizan MA; Kalyanasundram J; Kamel K.; Mohd Zawawi Z; Mohd-Zawawi Z; Ramly N; Robert F; Suppiah J; Thayan R                                                                                                                                                                                                                                                                                                                                                                                                                                                           |
| EPI_ISL_477210                                                                                                                                                                                                         | Institute for Stem Cell Science and Regenerative Medicine                                                                                                                      | National Centre for Biological Sciences                                                                                                            | Aswin Seshasayee; Awadhesh Pandit; Dasaradhi Palakodeti; Farhan Ali; Mohak Sharda; Shah-e-Jahan Gulzar; Srikar Krishna; Uma Ramakrishnan; Vanessa Molin Paynter; Varadha Sundarmurthy                                                                                                                                                                                                                                                                                                                                                                                 |
| EPI_ISL_882777,<br>EPI_ISL_1491538                                                                                                                                                                                     | Institute for Urban Disease Control and Prevention                                                                                                                             | COVID-19 Network Investigations (CONI) Alliance                                                                                                    | Amornmas Kongklieng; Anek Mungaomklang; Angkana Huang; Anthony R. Jones; Arporn Wangiwatsin; Bhakbhoom Panthan; Chonticha Klungtong; Duangkamon Loesbanluechai; Ekawat Pasomsub; Elizabeth Batty; Insee Sensorn; Janjira Thaipadungpanit; Kamolthip Atsawawaranunt; Khajohn Joonsalak; Khajohn Joonsalak; Kingkan Rakmanee; Krittikorn Kumpornsin; Namfon Kotanan; Prayuth Kaewmalang; Pukkaporn Parmwijitkul; Stefan Fernandez; Thanat Chookajorn; Theerarat Kochakarn; Treewat Watthanachockchai; Vichan Pawun; Wasun Chantratita; Wudtichai Manasatienki           |
| EPI_ISL_1057035,<br>EPI_ISL_1061425                                                                                                                                                                                    | Institute of Biocides and Medical Ecology, Belgrade, Serbia                                                                                                                    | Virology Department Institute of Microbiology and Immunology Faculty of Medicine University of Belgrade                                            | Abazovic Dzihan; Banko Ana; Despot Dragana; Loncar Ana; Milicevic Ogjnjen; Miljanovic Danijela                                                                                                                                                                                                                                                                                                                                                                                                                                                                        |
| EPI_ISL_2600368,<br>EPI_ISL_3712556,<br>EPI_ISL_3712588                                                                                                                                                                | Institute of Epidemiology, Disease Control and Research (IEDCR)                                                                                                                | IEDCR-ideSHI-icddr.b                                                                                                                               | Firdausi Qadri; Hassan Afrad; Manjur Hossain Khan; Omar Hamza; Sadia Rahman; Tahmina Shirin                                                                                                                                                                                                                                                                                                                                                                                                                                                                           |
| EPI_ISL_1510994, EPI_ISL_2322232, EPI_ISL_2322329, EPI_ISL_2322334, EPI_ISL_2492244, EPI_ISL_2644249, EPI_ISL_2644270, EPI_ISL_2887277, EPI_ISL_2966940, EPI_ISL_3030114, EPI_ISL_3503944                              | see above                                                                                                                                                                      | Institute of Microbiology and Immunology, Faculty of Medicine, University of Ljubljana                                                             | Alen Suljić; Andraž Celar; Dominika Šturm; Doroteja Vljaj; Mario Poljak; Matic Brvar; Miša Korva; Patricija Pozvek; Samo Zakotnik; Tatjana Avšič – Županc; Tomaž Mark Zorec; Špela Pleh                                                                                                                                                                                                                                                                                                                                                                               |
| EPI_ISL_491937, EPI_ISL_527813, EPI_ISL_660532, EPI_ISL_697789, EPI_ISL_877554, EPI_ISL_2100425, EPI_ISL_2100429, EPI_ISL_2100431, EPI_ISL_2228102, EPI_ISL_2361460, EPI_ISL_3089166, EPI_ISL_3506201, EPI_ISL_3506202 | see above                                                                                                                                                                      | Institute of Microbiology, Universidad San Francisco de Quito                                                                                      | Andrea Pinos; Belén Prado-Vivar; Bernardo Gutiérrez; Christian Zambrano; Edmundo Encalada; Erika B. Muñoz; Erika Muñoz; Fernada Zurita; Fernanda Zurita; Francisco Cordova; Gabriel Trueba; Guzmán Bernabéu Lorenzo; Hugo Hernández; Jonathan Araujo; Juan Carlos Zuñiga; Juan José Guadalupe; Juan Pablo Haro; Juan Pablo Román; Khurram Mahbbob; Kyllen Briones; Luis Morales; Michelle Grunauer; Miriam Ruiz; Monica Becerra-Wong; Nabih Dahik; Ninfa Hernandez; Patricio Rojas-Silva; Paul Cárdenas; Rosario Erazo; Sully Márquez; Tania Liuma; Verónica Barragán |
| EPI_ISL_1443652,<br>EPI_ISL_1443654                                                                                                                                                                                    | Institute of Microbiology, Universidad San Francisco de Quito                                                                                                                  | Omics Sciences Laboratory                                                                                                                          | ; Andrea Cunguan; Belén Prado-Vivar; Bernardo Gutiérrez; Darlyn Amaya; Dayron Brossad; Derly Andrade Molina; Emily Sulay Saltos Montalvo; Fernanda Zurita; Gabriel Morey León; Gabriel Trueba; Juan Carlos Fernández Cadena; Juan José Guadalupe; Kathryn Sacheri Viteri; Michelle Grunauer; Monica Becerra-Wong; Nabih Dahik; Patricio Rojas-Silva; Paula Juliana Gavilanes Jarrín; Paul Cárdenas; Rubén Armas González; Sully Márquez; Verónica Barragán                                                                                                            |
| EPI_ISL_2709774                                                                                                                                                                                                        | Institute of Molecular and Translational Medicine / Laboratory of Experimental Medicine, Faculty of Medicine and Dentistry, Palacky University and University Hospital Olomouc | Institute of Molecular and Translational Medicine / Laboratory of Experimental Medicine, Faculty of Medicine and Dentistry, Palacky University     | Barbora Blumová; Hana Dřimalová; Marián Hajdúch; Rastislav Slavkovský; Vladimíra Koudeláková                                                                                                                                                                                                                                                                                                                                                                                                                                                                          |
| EPI_ISL_403931                                                                                                                                                                                                         | Institute of Pathogen Biology, Chinese Academy of Medical Sciences & Peking Union Medical College                                                                              | Institute of Pathogen Biology, Chinese Academy of Medical Sciences & Peking Union Medical College                                                  | Chao Wu; Jianwei Wang; Lili Ren; Qi Jin; Yiwei Liu; Zhiqiang Wu; Zichun Xiang                                                                                                                                                                                                                                                                                                                                                                                                                                                                                         |
| EPI_ISL_2986987                                                                                                                                                                                                        | Institute of Public Health Kraljevo                                                                                                                                            | Veterinary Specialized Institute Kraljevo                                                                                                          | Afonso, C.; Banovic Djeri, B.; Djukic V. .; Jankovic, M.; Jovanovic, T.; Knezevic, A.; Petrovic, T.; Sekler, M.; Tesovic, B.; Vidanovic, D.; Volkening, J.                                                                                                                                                                                                                                                                                                                                                                                                            |
| EPI_ISL_959640,<br>EPI_ISL_1797878,<br>EPI_ISL_1818994,<br>EPI_ISL_1994554,<br>EPI_ISL_2351279,<br>EPI_ISL_2894474                                                                                                     | Institute of Virology, Biomedical Research Center of the Slovak Academy of Sciences, Bratislava                                                                                | Faculty of Natural Sciences, Comenius University, Bratislava                                                                                       | Boris Klempa; Brona Brejova; Broňa Brejová; Jozef Nosek; Juraj Kopacek; Juraj Kopáček; Kristína Borsova; Kristína Boršová; Lubomira Lukackikova; Martina Ličková; Martina Ličková; Martina Nebohačová; Monika Slavikova; Monika Sláviková; Sabina Fumacova Havlikova; Sabina Fumačová Havliková; Tomas Vinar; Tomáš Vinař; Viktoria Cabanova; Viktoria Hodorova; Viktória Hodorová; Viktória Čabanová; Lubomíra Lukáčiková                                                                                                                                            |
| EPI_ISL_1654837, EPI_ISL_3163954, EPI_ISL_3163956, EPI_ISL_3163960, EPI_ISL_3163961, EPI_ISL_3163962, EPI_ISL_3163965                                                                                                  | see above                                                                                                                                                                      | Institute of microbiology and Immunology, Faculty of Medicine, University of Belgrade                                                              | Banko A.; Cupic M.; Jankovic, M.; Jovanovic, T.; Knezevic, A.; Lazarevic I.; Milicevic, O.; Miljanovic D.; Sekler, M.; Tesovic, B.; Vidanovic, D.                                                                                                                                                                                                                                                                                                                                                                                                                     |
| EPI_ISL_1017686                                                                                                                                                                                                        | Institute of Virology, Vaccines and Sera "Torlak"                                                                                                                              | Institute of microbiology and Immunology, Faculty of Medicine, University of Belgrade                                                              | Jankovic, M.; Jovanovic, T.; Knezevic, A.; Milicevic, O.; Sekler, M.; Tesovic, B.; Vidanovic, D.                                                                                                                                                                                                                                                                                                                                                                                                                                                                      |
| EPI_ISL_792104                                                                                                                                                                                                         | Instituto Adolfo Lutz - Central                                                                                                                                                | Instituto Adolfo Lutz, Interdisciplinary Procedures Center, Strategic Laboratory                                                                   | Claudia Regina Gonçalves; Claudio Tavares Sacchi; Erica Valessa Ramos Gomes; Karoline Rodrigues Campos                                                                                                                                                                                                                                                                                                                                                                                                                                                                |

|                                                                                     |                                                                                                                                                                                                                                                                                |                                                                                                                                                                                                 |                                                                                                                                                                                                                                                                                                                                                                                                                                                                                                                                                                                                                                                                                                                                                                                                                                                                      |  |  |
|-------------------------------------------------------------------------------------|--------------------------------------------------------------------------------------------------------------------------------------------------------------------------------------------------------------------------------------------------------------------------------|-------------------------------------------------------------------------------------------------------------------------------------------------------------------------------------------------|----------------------------------------------------------------------------------------------------------------------------------------------------------------------------------------------------------------------------------------------------------------------------------------------------------------------------------------------------------------------------------------------------------------------------------------------------------------------------------------------------------------------------------------------------------------------------------------------------------------------------------------------------------------------------------------------------------------------------------------------------------------------------------------------------------------------------------------------------------------------|--|--|
| EPI_ISL_2691198                                                                     | Instituto Adolfo Lutz - Reginal de Sao José do Rio Preto                                                                                                                                                                                                                       | Instituto Adolfo Lutz, Interdisciplinary Procedures Center, Strategic Laboratory                                                                                                                | Caio Vinicius Dias Lopes; Claudia Regina Gonçalves; Claudio Tavares Sacchi; Erica Valessa Ramos Gomes; Karoline Rodrigues Campos; Leonardo Jose Tadeu de Araujo                                                                                                                                                                                                                                                                                                                                                                                                                                                                                                                                                                                                                                                                                                      |  |  |
| EPI_ISL_2344240, EPI_ISL_2344450                                                    | Instituto Butantan                                                                                                                                                                                                                                                             | Instituto de Medicina Tropical de Sao Paulo                                                                                                                                                     | Brazil-UK Centre for Arbovirus Discovery Diagnosis Genomics and Epidemiology (CADDE) Genomic Network - Instituto de Medicina Tropical                                                                                                                                                                                                                                                                                                                                                                                                                                                                                                                                                                                                                                                                                                                                |  |  |
| EPI_ISL_3418681                                                                     | Instituto Carlos Chagas - ICC, FIOCRUZ Parana                                                                                                                                                                                                                                  | Instituto Carlos Chagas - ICC, FIOCRUZ Parana                                                                                                                                                   | A.A.; A.M.; A.R.; Aguiar, L.; Alves; Avila; Balsanelli, E.; Becker, G.; Blanes, L.; Dallagiovanna, B.; Debur; E.M.; F.K.; F.O.; Faoro, H.; Graef, T.; H.G.; I.N.; L.G.; L.R.; M.M.; M.O.; Marchini, Md.C.; Morello; Nardeli; Oliveira; P.C.; Passetti, F.; Pedrosa; Resende; Riediger; S.C.; Schemberger; Suzukawa; V.A.; Zanette, D.; de Baura; de Souza; dos Santos                                                                                                                                                                                                                                                                                                                                                                                                                                                                                                |  |  |
| EPI_ISL_491176, EPI_ISL_491190, EPI_ISL_491226                                      | Instituto Gulbenkian de Ciência                                                                                                                                                                                                                                                | Instituto Gulbenkian de Ciência                                                                                                                                                                 | Cathy Paulino; Joao Sobral; João Costa; Ricardo Leite; Susana Ladeiro                                                                                                                                                                                                                                                                                                                                                                                                                                                                                                                                                                                                                                                                                                                                                                                                |  |  |
| EPI_ISL_2348761                                                                     | Instituto Nacional De Investigación En Salud Pública-Crn De Influenza Y Otros Virus Respiratorios                                                                                                                                                                              | NIC-Instituto Nacional de Investigación en Salud Pública                                                                                                                                        | Alfredo Bruno; Domenica de Mora.; Jimmy Garcés; Johanna Laines; Lizbeth Patiño; Manuel Gonzalez; Maritza Olmedo; Michelle Páez                                                                                                                                                                                                                                                                                                                                                                                                                                                                                                                                                                                                                                                                                                                                       |  |  |
| EPI_ISL_491953                                                                      | Instituto Nacional de Investigación en Salud Pública - INSPI                                                                                                                                                                                                                   | INSPI - Charité                                                                                                                                                                                 | Alberto Orlando; Alexandra Usiña; Alfredo Bruno Caicedo; Andres Moreira-Soto; Anna-Lena Sander; Denisses Portugal; Domenica de Mora Coloma; Jan Felix Drexler; Juan Carlos Zeballos; Manuel Gonzalez; Maritza Olmedo; Nina Krause; Silvia Salgado                                                                                                                                                                                                                                                                                                                                                                                                                                                                                                                                                                                                                    |  |  |
| EPI_ISL_2492714, see above                                                          | EPI_ISL_2492791, EPI_ISL_3730383, EPI_ISL_3730384, EPI_ISL_3730398, EPI_ISL_3730401, EPI_ISL_3730414, EPI_ISL_3730416, EPI_ISL_3730437, EPI_ISL_3730438, EPI_ISL_3730458, EPI_ISL_3859858, EPI_ISL_3859860, EPI_ISL_3859907, EPI_ISL_3860051, EPI_ISL_3860074, EPI_ISL_3860117 | CERI, Centre for Epidemic Response and Innoation, Stellenbosch University and KRISP, KZN Research Innovation and Sequencing Platform, UKZN.                                                     | Afonso P; David K; Emmanuel SJ; Freitas RH; Glandhari j; Inglês L; Lutucuta S; Miranda J; Morais J; Mufinda M; Naidoo Y; Neto Z; Paulo A Carralero RR Paixão JP; Pereira A; Pillay S; Tegally H; Wilkinson E; de Oliveira T                                                                                                                                                                                                                                                                                                                                                                                                                                                                                                                                                                                                                                          |  |  |
| EPI_ISL_1347945                                                                     | Instituto Nacional de Investigación em Saúde                                                                                                                                                                                                                                   | KRISP, KZN Research Innovation and Sequencing Platform                                                                                                                                          | Afonso P; David K; Emmanuel SJ; Freitas RH; Glandhari j; Inglês L; Lutucuta S; Miranda J; Morais J; Mufinda M; Naidoo Y; Neto Z; Paulo A Carralero RR Paixão JP; Pereira A; Pillay S; Tegally H; Wilkinson E; de Oliveira T                                                                                                                                                                                                                                                                                                                                                                                                                                                                                                                                                                                                                                          |  |  |
| EPI_ISL_1055023, EPI_ISL_2894237, EPI_ISL_3160783, EPI_ISL_3548071                  | Instituto Nacional de Medicina Genomica                                                                                                                                                                                                                                        | Instituto Nacional de Medicina Genomica                                                                                                                                                         | Alcaraz N; Cedro-Tanda A; Cisneros- Villanueva M; Cisneros-Villanueva M; Escobar-Arrazola; Escobar-Arrazola MA; Gonzalez-Barrera D; Herrera-Montalvo LA; Herrera-Montalvo LA.; Hidalgo-Miranda A; M; Mendoza-Vargas A; Munguia-Garza P; Ramirez-Vega O; Rangel-DeLeon D; Reyes-Grajeda JP; Sifuentes-Rojas C                                                                                                                                                                                                                                                                                                                                                                                                                                                                                                                                                         |  |  |
| EPI_ISL_2500963, EPI_ISL_2500964, EPI_ISL_2500965, EPI_ISL_2827762                  | Instituto Nacional de Salud                                                                                                                                                                                                                                                    | Instituto Nacional de Salud- Dirección de Investigación en Salud Pública                                                                                                                        | Carlos Franco-Muñoz; Carmen Osorio; Diana Malo; Diego A. Álvarez-Díaz; Diego Andrés Prada; Gerardo Santamaría; Hector Alejandro Ruiz-Moreno; Jhonnatán Reales-González; Jorge Rivera; Juan Camilo Martínez; Julian Naizaque; Katherine Laiton-Donato; Lisseth Pardo; Magdalena Wiesner; Marcela Mercado-Reyes; Maria T. Herrera-Sepúlveda; Marta Lopez Blanco; Martha Lucia Ospina Martinez; Paola Rojas; Sergio Gomez; Sheryll Corchuelo; Ángela Alarcon Cruz                                                                                                                                                                                                                                                                                                                                                                                                       |  |  |
| EPI_ISL_456130                                                                      | Instituto Nacional de Salud - Unidad de Secuenciación y Análisis Genómico                                                                                                                                                                                                      | Instituto Nacional de Salud, Universidad Cooperativa de Colombia, Instituto Alexander von Humboldt, Imperial College-London, London School of Hygiene & Tropical Medicine                       | Astrid C. Flórez; Carlos Franco-Muñoz; Christian Julian Villabona-Arenas; Diana Marcela Walteros-Acero; Diego A. Álvarez-Díaz; Erika Ospitia; Gloria Puerto; Jose A. Usme-Ciro; Juliana Barbosa; Katherine Laiton-Donato; Liz Villabona-Arenas; Luz Dary Rodriguez; Mailyn A.Gonzalez; Marcela Mercado-Reyes.; Martha Lucia Ospina Martinez; Nicolas D. Franco-Sierra; Sergio Gomez-Rangel; Sussy Echeverria; Zulma M. Cucunubá                                                                                                                                                                                                                                                                                                                                                                                                                                      |  |  |
| EPI_ISL_526969, EPI_ISL_739673                                                      | Instituto Nacional de Salud, Bogotá, Colombia                                                                                                                                                                                                                                  | Instituto Nacional de Salud, Bogotá, Colombia                                                                                                                                                   | Astrid C. Flórez; Carlos Andrés Durán; Carlos Franco-Muñoz; Carolina Ferro; Christian Julian Villabona-Arenas; Diana Marcela Walteros-Acero; Diego A. Álvarez-Díaz; Diego Andrés Prada; Franklin Prieto; Jonathan Reales; Jose A. Usme-Ciro; Katherine Laiton-Donato; Liz Villabona-Arenas; Magdalena Weisner; Marcela Mercado-Reyes; Martha Lucia Ospina Martinez; Mauricio Pacheco-Montealegre; Sheryl Corchuelo; Sussy Echeverria; Zulma M. Cucunubá                                                                                                                                                                                                                                                                                                                                                                                                              |  |  |
| EPI_ISL_3663545, see above                                                          | EPI_ISL_3663546, EPI_ISL_3663547, EPI_ISL_3663548, EPI_ISL_3663550, EPI_ISL_3663552, EPI_ISL_3663554, EPI_ISL_3663569, EPI_ISL_3663582, EPI_ISL_3663600                                                                                                                        |                                                                                                                                                                                                 | Emmanuel S; Glandhari j; Nadia Siteo; Naidoo Yeshnee; Nalia Ismael; Nedio Mabunda; Paulo Arnaldo; Pillay S; Tegally H; Tshabulla Derek; Wilkinson E; Yajna Ramphal; de Oliveira T                                                                                                                                                                                                                                                                                                                                                                                                                                                                                                                                                                                                                                                                                    |  |  |
| EPI_ISL_2396951                                                                     | Instituto Nacional de Saude (INS), Mozambique                                                                                                                                                                                                                                  | KRISP, KZN Research Innovation and Sequencing Platform                                                                                                                                          | Emmanuel S; Glandhari j; Nadia Siteo; Nalia Ismael; Nedio Mabunda; Paulo Arnaldo; Pillay S; Tegally H; Wilkinson E; de Oliveira T                                                                                                                                                                                                                                                                                                                                                                                                                                                                                                                                                                                                                                                                                                                                    |  |  |
| EPI_ISL_3507367, EPI_ISL_3507369, EPI_ISL_3507373, EPI_ISL_3507374, EPI_ISL_3507375 | Instituto Venezolano de Investigaciones Cientificas                                                                                                                                                                                                                            | Laboratorio de Virologia Molecular                                                                                                                                                              | Carmen L Loureiro; CoViVen Group; Domingo J Garzaró; Flor H Pujol; Héctor R Rangel; José Luis Zambrano; Lieska Rodríguez; Mariana Hidalgo; Pierina D´Angelo; Rossana C Jaspe; Víctor Alarcón; Yoneira Sulbaran; Zoila Moros                                                                                                                                                                                                                                                                                                                                                                                                                                                                                                                                                                                                                                          |  |  |
| EPI_ISL_455432, EPI_ISL_455434, EPI_ISL_493338, EPI_ISL_493342, EPI_ISL_576278      | Instituto de Diagnostico y Referencia Epidemiologicos (INDRE)                                                                                                                                                                                                                  | Instituto de Diagnostico y Referencia Epidemiologicos (INDRE)                                                                                                                                   | Abril Rodriguez-Maldonado; Adnan Araiza-Rodríguez; Araiza-Rodríguez Adnan; Barrera-Badillo Gisela; Claudia Wong-Arambula; Dayanira Arellano-Suarez; Edgar Mendieta-Condado; Ernesto Ramirez-Gonzalez; Ernesto Ramirez-Gonzalez.; Fabiola Garces-Ayala; Garces-Ayala Fabiola; Gisela Barrera-Badillo; Gisela Barrera-Badillo.; Hernandez-Rivas Lucia; Irma Lopez-Martinez; Lopez-Martinez Irma.; Lucia Hernandez-Rivas; Mendieta-Condado Edgar; Natividad Cruz-Ortiz; Rodríguez-Maldonado Abril; Taboada Ramirez Blanca. Ramirez-Gonzalez Ernesto; Tatiana Nunez-García; Wong-Arambula Claudia                                                                                                                                                                                                                                                                        |  |  |
| EPI_ISL_1060761                                                                     | Instituto de Diagnostico y Referencia Epidemiologicos (INDRE)_RNLS                                                                                                                                                                                                             | Instituto de Diagnostico y Referencia Epidemiologicos (INDRE)                                                                                                                                   | Abril Rodriguez-Maldonado; Adnan Araiza-Rodríguez; Claudia Wong-Arambula; David Fragoso-Fonseca; Ernesto Ramirez-Gonzalez.; Fabiola Garces-Ayala; Gisela Barrera-Badillo; Irma Lopez-Martinez; Lucia Hernandez-Rivas; Mayra Jimenez-Morales; Nancy Munoz-Hernandez; Natividad Cruz-Ortiz; Sergio Rangel-Guerrero; Tatiana Nunez-Garcia                                                                                                                                                                                                                                                                                                                                                                                                                                                                                                                               |  |  |
| EPI_ISL_913929, see above                                                           | EPI_ISL_913936, EPI_ISL_913971, EPI_ISL_1054949, EPI_ISL_1054969, EPI_ISL_1054986, EPI_ISL_1168551                                                                                                                                                                             | Instituto de Diagnostico y Referencia Epidemiologicos (INDRE)                                                                                                                                   | Abril Rodriguez-Maldonado; Adnan Araiza-Rodríguez; Ariadna Medina-Benitez; Claudia Wong-Arambula; David Fragoso-Fonseca; Ernesto Ramirez-Gonzalez.; Fabiola Garces-Ayala; Gisela Barrera-Badillo; Irma Lopez-Martinez; Joaquin Quiroz-Mercado; Lucia Hernandez-Rivas; Mayra Jimenez-Morales; Nancy Munoz-Hernandez; Natividad Cruz-Ortiz; Sergio Rangel-Guerrero; Tatiana Nunez-Garcia; Vanessa Rivero-Arredondo                                                                                                                                                                                                                                                                                                                                                                                                                                                     |  |  |
| EPI_ISL_1301592, EPI_ISL_1301702, EPI_ISL_3463581, EPI_ISL_3463595                  | Instituto de Diagnostico y Referencia Epidemiologicos INDRE_RNLS                                                                                                                                                                                                               | Instituto de Biotecnología de la UNAM                                                                                                                                                           | Alejandra Hernández-Terán; Alejandro Sanchez-Flores; Alma Rincón-Rubio; Andrea Santos Coy-Arechavaleta; Authors from IBT; Blanca Taboada; Celia Boukadida; Clara Esperanza Santacruz-Tinoco; Edgar Mendieta-Condado; Eduardo Becerril-Vargas; Fidencio Mejía-Nepomuceno; Francisco Pulido; Gisela Barrera-Badillo; Gloria Vazquez; Hector Esteban Paz-Juárez; IMSS; InDRE and INER (in alphabetical order); Carlos F. Arias; Irma Lopez-Martinez; Jerome Jean Verleyen; Joel Armando Vázquez-Pérez; Jorge Salas-Hernández; José Arturo Martínez-Orozco; José Ernesto Ramírez-González; José Esteban Muñoz-Medina; Larissa Fernandes-Matano; Lucia Hernandez-Rivas; Luis Alberto Ochoa-Carrera; Margarita Matias-Florentino; Mario Mújica-Sánchez; Natividad Cruz-Ortiz; Pavel Isa; Ricardo Grande; Santiago Ávila-Ríos; Tatiana Nunez-Garcia; Teresita Rojas-Mendoza |  |  |
| EPI_ISL_1395782                                                                     | Instituto de Investigaciones Biomédicas en Retrovirus y SIDA (INBIRS)                                                                                                                                                                                                          | Área de Secuenciación del Laboratorio de Virología del Hospital de Niños Dr. Ricardo Gutierrez on behalf of 'Proyecto Argentino Interinstitucional de genómica de SARS-CoV-2' (PAIS Consortium) | Acuña; Alexay; D; Federico Remes Lenicov; Goya; Horacio Salomón; LE; Lusso; M; MI; Nabaes Jodar; Natale; S; Valinotto; Vanesa Seery; Viegas, M.                                                                                                                                                                                                                                                                                                                                                                                                                                                                                                                                                                                                                                                                                                                      |  |  |
| EPI_ISL_1378844, EPI_ISL_3236440, EPI_ISL_3236451                                   | Instituto de Medicina Tropical & Salud Global Universidad Iberoamericana                                                                                                                                                                                                       | Grubaguh Lab - Yale School of Public Health                                                                                                                                                     | Alejandaro Vallejo Degaudenzi; Anderson Brito; Annie Watkins; Chaney Kalinich; Chantal Vogels; Elisa Contreras; Esperanza Mendoza; Isabel Ott; Isabell Ott; Jessica Rothman; Joseph Fauver; Kendall Billig; Mallery Breban; Mary Petrone; Nathan Grubaugh; Robert Paulino-Ramirez; Tara Alpert; Tobias Koch; Victor Virgilio Calderon                                                                                                                                                                                                                                                                                                                                                                                                                                                                                                                                |  |  |
| EPI_ISL_2601035                                                                     | Instituto de Medicina Tropical & Salud Global, Universidad Iberoamericana (UNIBE)                                                                                                                                                                                              | Instituto de Medicina Tropical & Salud Global, Universidad Iberoamericana (UNIBE)                                                                                                               | Alejandro Vallejo Degaudenzi & Robert Paulino-Ramirez; Victor Virgilio Calderón                                                                                                                                                                                                                                                                                                                                                                                                                                                                                                                                                                                                                                                                                                                                                                                      |  |  |
| EPI_ISL_3020261                                                                     | Instituto de Medicina Tropical Alexander Von Humboldt, Sede Cusco                                                                                                                                                                                                              | Laboratorio de Genómica Microbiana, Universidad Peruana Cayetano Heredia                                                                                                                        | Alejandra Dávila-Barclay; Diego Cuicapuza; Guillermo Salvatierra; Janet Huancachoque; Luis González; Pablo Tsukayama; Pedro E. Romero; Pool Marcos                                                                                                                                                                                                                                                                                                                                                                                                                                                                                                                                                                                                                                                                                                                   |  |  |
| EPI_ISL_1697390                                                                     | Iressef / LBV                                                                                                                                                                                                                                                                  | Iressef Genomics lab                                                                                                                                                                            | Abdou PADANE; Adjiratou Aissatou BA; Alioune TINE; Ambroise AHOUIDI; Aminata DIA; Aminata MBOUP; Anna Julienne Selbe NDIAYE; Assane DIENG; Astou Gaye GAYE; Barada CISSE; Birahim Piere NDIAYE; Gora LO; Khadim GUEYE; Makhtar Camara; Mengue FALL; Moustapha MBOW; Nafisatou LEYE; Ndeye Coumba Toure KANE; OUMY DIOP; Papa Alassane DIAW; Pauline SENE; SADA DIALLO; Serigne Mbaye Lo NDIAYE; Souleymane MBOUP; Yacine DIA                                                                                                                                                                                                                                                                                                                                                                                                                                         |  |  |
| EPI_ISL_2620888, see above                                                          | EPI_ISL_2620889, EPI_ISL_2873833, EPI_ISL_2887851, EPI_ISL_2887852, EPI_ISL_3154879, EPI_ISL_3154891, EPI_ISL_3154898                                                                                                                                                          | IRRESSEF                                                                                                                                                                                        | Abdou PADANE; Ambroise AHOUIDI; Aminata DIA; Aminata MBOUP; Astou Gaye GAYE; Barada CISSE; Birahim Piere NDIAYE; Diabou Diagne; Gora LO; Khadim GUEYE; Moustapha MBOW; Nafisatou LEYE; Ndeye Coumba Toure KANE; Papa Alassane DIAW; Samba Ndiour; Seni Ndiaye; Souleymane MBOUP; Yacine DIA                                                                                                                                                                                                                                                                                                                                                                                                                                                                                                                                                                          |  |  |
| EPI_ISL_1167164                                                                     | Iressef Genomics lab                                                                                                                                                                                                                                                           | L'institut de Recherche en Santé, de Surveillance Épidémiologique et de Formation (IRESSEF)                                                                                                     | Abdou PADANE; Abdoulie KANTEH; Abdul Karim SESAY; Ambroise AHOUIDI; Aminata DIA; Aminata MBOUP; Astou Gaye GAYE; Barada CISSE; Birahim Piere NDIAYE; Gora LO; Khadim GUEYE; Moustapha MBOW; Nafisatou LEYE; Ndeye Coumba Toure KANE; Papa Alassane DIAW; Souleymane MBOUP; Yacine DIA                                                                                                                                                                                                                                                                                                                                                                                                                                                                                                                                                                                |  |  |
| EPI_ISL_2363855                                                                     | Islab, Pohjois-Savon aluelaboratorio                                                                                                                                                                                                                                           | Expert Microbiology, National Institute for Health and Welfare                                                                                                                                  | Carita Savolainen-Kopra; Erika Lindh; Haider al-Hello; Jani Halkilahti; Kirsi Liitsola; Niina Ikonen; Pekka Elonen; Päivi Laurila; Sari Hannula; Solle Blomqvist; Teemu Smura                                                                                                                                                                                                                                                                                                                                                                                                                                                                                                                                                                                                                                                                                        |  |  |
| EPI_ISL_1240647                                                                     | Israel Central Virology Laboratory                                                                                                                                                                                                                                             | Israel National Consortium for SARS-CoV-2 sequencing                                                                                                                                            | Assaf Rokney; Dana Bar-Ilan; David A. Zeevi; Efrat Dahan Bucris; Efrat Glick-Saar; Efrat Rorman; Ella Mendelson; Ephraim Fass; Eva Nachum; Gal Zizelski Valenci; Gideon Rechavi; Israel Nissan; Joseph Jaffe; Maya Davidovich Cohen; Michal Mandelboim; Mor Rubinstein; Neta Zuckerman; Omer Murik; Omri Nayshool; Oran Erster; Orna Mor; Tzvia Mann                                                                                                                                                                                                                                                                                                                                                                                                                                                                                                                 |  |  |
| EPI_ISL_514301, EPI_ISL_516885, EPI_ISL_516903, EPI_ISL_575332, EPI_ISL_649094      | Israel Central Virology laboratory                                                                                                                                                                                                                                             | Israel Central Virology laboratory                                                                                                                                                              | Efrat Dahan Bucris; Ella Mendelson; Michal Mandelboim; Neta Zuckerman; Oran Erster                                                                                                                                                                                                                                                                                                                                                                                                                                                                                                                                                                                                                                                                                                                                                                                   |  |  |
| EPI_ISL_2085212, EPI_ISL_2636201, EPI_ISL_2636253, EPI_ISL_3278414, EPI_ISL_3278749 | Israel Central Virology laboratory                                                                                                                                                                                                                                             | Israel National Consortium for SARS-CoV-2 sequencing                                                                                                                                            | Dana Bar-Ilan; Danit Sofer; Efrat Dahan Bucris; Efrat Glick-Saar; Ella Mendelson; Gideon Rechavi; Michal Mandelboim; Miranda Geva; Neta Zuckerman; Netanel Abu; Omer Asraf; Omri Nayshool; Oran Erster; Orna Mor                                                                                                                                                                                                                                                                                                                                                                                                                                                                                                                                                                                                                                                     |  |  |
| EPI_ISL_778745, EPI_ISL_1424301, EPI_ISL_2226866, EPI_ISL_2356926,                  | Istituto Zooprofilattico Sperimentale del Mezzogiorno                                                                                                                                                                                                                          | TIGEM                                                                                                                                                                                           | Andrea Ballabio; Anna Manfredi; Antonio Grimaldi; Antonio Grimaldi Patrizia Annunziata Francesco Panariello Biancamaria Pierri Claudia Tiberio Teresa Giuliano Valentina Bouche Chiara Colantuono Maria Concetta Cuomo Denise Di Concilio Lucio Di Filippo Anna Manfredi Marcello Salvi Antonio Limone Luigi Atripaldi Pellegrino Cerino Andrea Ballabio Davide Cacchiarelli; Antonio Limone; Antonio Limone Luigi Atripaldi Pellegrino Cerino; Biancamaria Pierri; Biancamaria Pierri Claudia Tiberio Valentina Bouche; Chiara Colantuono; Davide Cacchiarelli; Davide Cacchiarelli.; Denise Di Concilio; Francesco Panariello; Lucio Di Filippo; Marcello Salvi; Maria Concetta Cuomo; Patrizia Annunziata; Pellegrino Cerino; Valentina Bouche                                                                                                                    |  |  |

|                                                                                                                                                                                                                                                                                                                                                                     |                                                                                                          |                                                                                                                                |                                                                                                                                                                                                                                                                                                                                                                                                                                                                                                                                                                                                                                                                                                                                                                                                                                                                                                                                                                                                                                                                                                                                                                                                                                                                                                                                                                                                                                                                                                                                                                                                                                                                                                                   |
|---------------------------------------------------------------------------------------------------------------------------------------------------------------------------------------------------------------------------------------------------------------------------------------------------------------------------------------------------------------------|----------------------------------------------------------------------------------------------------------|--------------------------------------------------------------------------------------------------------------------------------|-------------------------------------------------------------------------------------------------------------------------------------------------------------------------------------------------------------------------------------------------------------------------------------------------------------------------------------------------------------------------------------------------------------------------------------------------------------------------------------------------------------------------------------------------------------------------------------------------------------------------------------------------------------------------------------------------------------------------------------------------------------------------------------------------------------------------------------------------------------------------------------------------------------------------------------------------------------------------------------------------------------------------------------------------------------------------------------------------------------------------------------------------------------------------------------------------------------------------------------------------------------------------------------------------------------------------------------------------------------------------------------------------------------------------------------------------------------------------------------------------------------------------------------------------------------------------------------------------------------------------------------------------------------------------------------------------------------------|
| EPI_ISL_2550987<br>EPI_ISL_1254720                                                                                                                                                                                                                                                                                                                                  | Istituto Zooprofilattico Sperimentale del Mezzogiorno                                                    | Teletthon Institute of Genetics and Medicine (TIGEM)                                                                           | Antonio Grimaldi Patrizia Annunziata Francesco Panariello Biancamaria Pierri Claudia Tiberio Valentina Bouche Chiara Colantuono Maria Concetta Cuomo Denise Di Concilio Lucio Di Filippo Anna Manfredi Marcello Salvi Antonio Limone Luigi Atripaldi Pellegrino Cerino Andrea Ballabio Davide Cacciarielli                                                                                                                                                                                                                                                                                                                                                                                                                                                                                                                                                                                                                                                                                                                                                                                                                                                                                                                                                                                                                                                                                                                                                                                                                                                                                                                                                                                                        |
| EPI_ISL_3769356,<br>EPI_ISL_3769372                                                                                                                                                                                                                                                                                                                                 | JKN PAHANG                                                                                               | IPROMISE, UiTM                                                                                                                 | Ariza Adnan; Fadzilah Mohd Nor; Lim Wai Feng; Mohd Asif Mohd Sukri; Mohd Nur Fakhruzzaman Noorizhab; Mohd Zaki Salleh; Sazzli Shahlan Kassim; Siti Farah Alwani Mohd Naw; Siti Hamimah Sheikh Abdul Kadir; Teh Lay Kek; Wang Seok Mui                                                                                                                                                                                                                                                                                                                                                                                                                                                                                                                                                                                                                                                                                                                                                                                                                                                                                                                                                                                                                                                                                                                                                                                                                                                                                                                                                                                                                                                                             |
| EPI_ISL_2958697<br>EPI_ISL_3087589                                                                                                                                                                                                                                                                                                                                  | Jaber Al Ahmad Hospital<br>Jaber Quarantine Station                                                      | Virology Lab, Jaber Al Ahmad Hospital<br>Virology Lab, Jaber Al Ahmad Hospital                                                 | Dr. Ebaa Al-Awadhi; Dr. Zahrah Buhamad; Haroon Masih; Khubaid-ur-Rehman<br>Adil Afridi; Dr. Ebaa Al-Awadhi; Dr. Zahrah Buhamad; Haroon Masih; Khubaid-ur-Rehman                                                                                                                                                                                                                                                                                                                                                                                                                                                                                                                                                                                                                                                                                                                                                                                                                                                                                                                                                                                                                                                                                                                                                                                                                                                                                                                                                                                                                                                                                                                                                   |
| EPI_ISL_2984234                                                                                                                                                                                                                                                                                                                                                     | Jahra Hospital                                                                                           | Kuwait Cancer Control Center                                                                                                   | Mona Alateeqi; Shakir Bahzad                                                                                                                                                                                                                                                                                                                                                                                                                                                                                                                                                                                                                                                                                                                                                                                                                                                                                                                                                                                                                                                                                                                                                                                                                                                                                                                                                                                                                                                                                                                                                                                                                                                                                      |
| EPI_ISL_779257,<br>EPI_ISL_779272,<br>EPI_ISL_779288,<br>EPI_ISL_779290,<br>EPI_ISL_2151364,<br>EPI_ISL_3052635                                                                                                                                                                                                                                                     | Jamil-ur-Rahman Center for Genome Research, Dr. Panjwani Center for Molecular Medicine and Drug Research | Jamil-ur-Rahman Center for Genome Research, Dr. Panjwani Center for Molecular Medicine and Drug Research                       | A.H.; Ain, N.; Ansari, S.; Hashmi; I.A.; Imran, S.; Irfan, M.; Khan; Khan, I.; Khan, S.; M.K.; Nisa; Nisa, Z.; Parveen, N.; Rashid, M.; Shafi; Shakeel, M.; Siddiqui, S.; Z.U.; Zehra, M.                                                                                                                                                                                                                                                                                                                                                                                                                                                                                                                                                                                                                                                                                                                                                                                                                                                                                                                                                                                                                                                                                                                                                                                                                                                                                                                                                                                                                                                                                                                         |
| EPI_ISL_416626                                                                                                                                                                                                                                                                                                                                                      | Japanese Quarantine Stations                                                                             | Pathogen Genomics Center, National Institute of Infectious Diseases                                                            | Hajime Kamiya; Hideki Hasegawa; Ikuyo Takayama; Kentaro Itokawa; Makoto Kuroda; Masanori Hashino; Motoi Suzuki; Rina Tanaka; Shinji Saito; Takaji Wakita; Takuri Takahashi; Takuya Yamagishi; Tsutomu Kageyama; Tsuyoshi Sekizuka                                                                                                                                                                                                                                                                                                                                                                                                                                                                                                                                                                                                                                                                                                                                                                                                                                                                                                                                                                                                                                                                                                                                                                                                                                                                                                                                                                                                                                                                                 |
| EPI_ISL_3105867<br>EPI_ISL_2140207                                                                                                                                                                                                                                                                                                                                  | Jecsons Medical Center<br>Jessa                                                                          | Research Institute for Tropical Medicine<br>Jessa                                                                              | Clyde Daplat; Deana Mae Ocampo; Emmanuel Kagnig Tsinda; Francisco Gerardo Polotan; Hitoshi Oshitani; Inez Andrea Medado; Jefferson Earl Halog; Joana Ina Manalo; Lei Lanna Dancel; Ma Angelica Tujan; Mariko Saito-Obata; Mayuko Saito; Michiko Okamoto; Samantha Louise Bado Berden et al. on behalf of the Jessa_cmdLab                                                                                                                                                                                                                                                                                                                                                                                                                                                                                                                                                                                                                                                                                                                                                                                                                                                                                                                                                                                                                                                                                                                                                                                                                                                                                                                                                                                         |
| EPI_ISL_2932611,<br>EPI_ISL_2932618                                                                                                                                                                                                                                                                                                                                 | Jordan University of Science Technology/ Irbid filed Hospital/ MOH                                       | Princess Haya Biotechnology Center/ Jordan University of Science Technology                                                    | Areej Alquran; Emad Abu Yaqeen; Hazem Haddad; Maha Karam; Saied Jaradat; Shereen Issa; Suha Hasan                                                                                                                                                                                                                                                                                                                                                                                                                                                                                                                                                                                                                                                                                                                                                                                                                                                                                                                                                                                                                                                                                                                                                                                                                                                                                                                                                                                                                                                                                                                                                                                                                 |
| EPI_ISL_3275172                                                                                                                                                                                                                                                                                                                                                     | K. Maafushi                                                                                              | Indira Gandhi Memorial Hospital                                                                                                | Dr. Milza Abdul Muhsin; Mr. Ibrahim Nishan Ahmed; Ms. Aishath Shuhudha; Ms. Aminath Nazfa; Ms. Fathimath Zimna                                                                                                                                                                                                                                                                                                                                                                                                                                                                                                                                                                                                                                                                                                                                                                                                                                                                                                                                                                                                                                                                                                                                                                                                                                                                                                                                                                                                                                                                                                                                                                                                    |
| EPI_ISL_2602527, EPI_ISL_2602631, EPI_ISL_2602659, EPI_ISL_2602663, EPI_ISL_2602665, EPI_ISL_2602710, EPI_ISL_2602724, EPI_ISL_2602763, EPI_ISL_2603095, EPI_ISL_2603104, EPI_ISL_2603108, EPI_ISL_3049430, EPI_ISL_3049483, EPI_ISL_3049509, EPI_ISL_3049510, EPI_ISL_3049570, EPI_ISL_3049694, EPI_ISL_3049762, EPI_ISL_3049775, EPI_ISL_3049815, EPI_ISL_3049838 | KEMRI-Wellcome Trust Research Programme, Kilifi                                                          | KEMRI-Wellcome Trust Research Programme, Kilifi                                                                                | Githinji G.; Matoke D.; Mburu M.W.; Mohamed K.S.; Onyango C.; Thiongo K.; de Laurent Z.                                                                                                                                                                                                                                                                                                                                                                                                                                                                                                                                                                                                                                                                                                                                                                                                                                                                                                                                                                                                                                                                                                                                                                                                                                                                                                                                                                                                                                                                                                                                                                                                                           |
| EPI_ISL_568703,<br>EPI_ISL_968883,<br>EPI_ISL_1039229                                                                                                                                                                                                                                                                                                               | KEMRI-Wellcome Trust Research Programme/KEMRI-CGMR-C Kilifi                                              | KEMRI-Wellcome Trust Research Programme/KEMRI-CGMR-C Kilifi                                                                    | Githinji et al; Githinji et al 2020                                                                                                                                                                                                                                                                                                                                                                                                                                                                                                                                                                                                                                                                                                                                                                                                                                                                                                                                                                                                                                                                                                                                                                                                                                                                                                                                                                                                                                                                                                                                                                                                                                                                               |
| EPI_ISL_3643972                                                                                                                                                                                                                                                                                                                                                     | KIMBERLEY LABORATORY                                                                                     | National Institute for Communicable Diseases of the National Health Laboratory Service                                         | Amoako DG; Bhiman JN; Everatt J; Ismail A; Mahlangu B; Mnguni A; Mohale T; Ntuli N; Scheepers C                                                                                                                                                                                                                                                                                                                                                                                                                                                                                                                                                                                                                                                                                                                                                                                                                                                                                                                                                                                                                                                                                                                                                                                                                                                                                                                                                                                                                                                                                                                                                                                                                   |
| EPI_ISL_1048849,<br>EPI_ISL_1049006                                                                                                                                                                                                                                                                                                                                 | KU Leuven, Rega Institute, Clinical and Epidemiological Virology                                         | KU Leuven, Rega Institute, Clinical and Epidemiological Virology                                                               | Bert Vanmechelen; Joan Marti-Carreras; Piet Maes; Tony Wawina-Bokalanga                                                                                                                                                                                                                                                                                                                                                                                                                                                                                                                                                                                                                                                                                                                                                                                                                                                                                                                                                                                                                                                                                                                                                                                                                                                                                                                                                                                                                                                                                                                                                                                                                                           |
| EPI_ISL_3430318                                                                                                                                                                                                                                                                                                                                                     | Kaduna                                                                                                   | National Reference Laboratory, Nigeria Centre for Disease Control                                                              | Anthony Ahumbe; Catherine Okoi; Celestina Obiekea; Chimaobi Chukwu; Dr Chikwe Ihekweazu; Dr Ndodo Nnaemeka; Dr Omare Adesuyi; Nwando Mba; Olusola Anuoluwapo Akanbi                                                                                                                                                                                                                                                                                                                                                                                                                                                                                                                                                                                                                                                                                                                                                                                                                                                                                                                                                                                                                                                                                                                                                                                                                                                                                                                                                                                                                                                                                                                                               |
| EPI_ISL_495443                                                                                                                                                                                                                                                                                                                                                      | Kafkas University, Faculty of Medicine, Department of Medical Microbiology                               | Kafkas University, Faculty of Medicine, Department of Medical Microbiology                                                     | Didem Ozgur; E. Ediz Tutuncu; Murat Karameşe                                                                                                                                                                                                                                                                                                                                                                                                                                                                                                                                                                                                                                                                                                                                                                                                                                                                                                                                                                                                                                                                                                                                                                                                                                                                                                                                                                                                                                                                                                                                                                                                                                                                      |
| EPI_ISL_3806899<br>EPI_ISL_2233101                                                                                                                                                                                                                                                                                                                                  | Kansas Health and Environmental Lab<br>Kantor Kesehatan Pelabuhan Kelas II Cilacap                       | Kansas Health and Environmental Lab<br>National Institute of Health Research and Development                                   | Amanda Bradley; Carrie Welch; Gary Burruss; Jonathan Barnell; Meg Wise; Mike Grose; and Phil Adam<br>Arie Ardiansyah Nugraha; Hana Apsari Pawestri; Hartanti Dian Ikawati; Kartika Dewi Puspa; Krisna Pangesti; Nelly Puspandari; Subangkit; Triyani Soekarso; Vivi Setiawaty                                                                                                                                                                                                                                                                                                                                                                                                                                                                                                                                                                                                                                                                                                                                                                                                                                                                                                                                                                                                                                                                                                                                                                                                                                                                                                                                                                                                                                     |
| EPI_ISL_2898899,<br>EPI_ISL_3461891                                                                                                                                                                                                                                                                                                                                 | Karolinska University Hospital Solna                                                                     | Karolinska University Hospital                                                                                                 | Annelie Bjerkner; Isak Sylvin; Jan Albert; Karolina Ininbergs; Lina Guerra Blomqvist; Lynda Eneh; Martin Ekman; Martina Wahlund; Robert Dyrdak; Sandra Broddesson; Tanja Normark; Tobias Allander; Valtteri Wirta; Zhibing Yun                                                                                                                                                                                                                                                                                                                                                                                                                                                                                                                                                                                                                                                                                                                                                                                                                                                                                                                                                                                                                                                                                                                                                                                                                                                                                                                                                                                                                                                                                    |
| EPI_ISL_2820297,<br>EPI_ISL_2820304                                                                                                                                                                                                                                                                                                                                 | Kasane Primary Hospital Laboratory                                                                       | Botswana Harvard HIV Reference Laboratory                                                                                      | Agnes Karutwaeng; Boitumelo Zuze; Botshelo Radibe; Dorcas Maruapula; Joseph Makhema; Keoratile Ntshambiwa; Legodile Kooepile; Madisa Mine; Mosepele Mosepele; Ontlametse T. Bareng; Roger Shapiro; Rose Munyere; Shahin Lockman; Sikhulile Moyo; Simani Gaseitsiwe; Thongbotho Mphoyakgosi; Wonderful T. Choga                                                                                                                                                                                                                                                                                                                                                                                                                                                                                                                                                                                                                                                                                                                                                                                                                                                                                                                                                                                                                                                                                                                                                                                                                                                                                                                                                                                                    |
| EPI_ISL_754063,<br>EPI_ISL_754064,<br>EPI_ISL_754065                                                                                                                                                                                                                                                                                                                | Kathmandu University                                                                                     | Nepal Health Research Council                                                                                                  | Meghnath Dhimal; Pradip Gyanwali                                                                                                                                                                                                                                                                                                                                                                                                                                                                                                                                                                                                                                                                                                                                                                                                                                                                                                                                                                                                                                                                                                                                                                                                                                                                                                                                                                                                                                                                                                                                                                                                                                                                                  |
| EPI_ISL_512812,<br>EPI_ISL_512817                                                                                                                                                                                                                                                                                                                                   | Kenema Government Hospital, Ministry of Health and Sanitation                                            | Kenema Government Hospital, Ministry of Health and Sanitation                                                                  | Andersen, K.; Garry, R.; Goba, A.; Grant, D.; Happi, C.; Jalloh, S.; Mehta, S.; Momoh, M.; Olawoye, I.; Oluniyi, P.; Park, D.; Sandi, J.; Siddle, K.; Tomkins-Tinch, C.                                                                                                                                                                                                                                                                                                                                                                                                                                                                                                                                                                                                                                                                                                                                                                                                                                                                                                                                                                                                                                                                                                                                                                                                                                                                                                                                                                                                                                                                                                                                           |
| EPI_ISL_966331<br>EPI_ISL_489997,<br>EPI_ISL_490004                                                                                                                                                                                                                                                                                                                 | Kentucky State Public Health Lab<br>King Fahad Medical City                                              | Kentucky State Public Health Lab<br>King Fahad Medical City                                                                    | Joshua Tobias; Karim George; Matthew Johnson; Rachel Zinner; Rhonda Lucas; Stephanie Lunn; Vaneet Arora; William Grooms<br>Alghoraibi, M.; Alosaimi, B.; Enani, M.; Naeem, A.                                                                                                                                                                                                                                                                                                                                                                                                                                                                                                                                                                                                                                                                                                                                                                                                                                                                                                                                                                                                                                                                                                                                                                                                                                                                                                                                                                                                                                                                                                                                     |
| EPI_ISL_3237048                                                                                                                                                                                                                                                                                                                                                     | King Faisal Specialist Hospital & Research Centre                                                        | King Faisal Specialist Hospital & Research Centre                                                                              | Abeer N Alshukairi; Ashraf Dada; Mohamad K Al Hroub; Rayan Bawayan; Waseem A Al Mousa                                                                                                                                                                                                                                                                                                                                                                                                                                                                                                                                                                                                                                                                                                                                                                                                                                                                                                                                                                                                                                                                                                                                                                                                                                                                                                                                                                                                                                                                                                                                                                                                                             |
| EPI_ISL_483547                                                                                                                                                                                                                                                                                                                                                      | Kingdom of Bahrain Ministry of Health                                                                    | Erasmus Medical Center                                                                                                         | Amjad Ghanem Mohamed; Anne van der Linden; Bas Oude Munnink; Claudia Schapendonk; David Nieuwenhuijse; Ebrahim Shehad; Fatema; Hashmeya Al Wasti; Irina Chestakova; Marion Koopmans; Mark Pronk; Pascal Lexmond; Reina Sikkema; Richard Molenkamp; Stefan van Nieuwkoop; Theo Bestebroer; on behalf of the Dutch national COVID-19 response team.                                                                                                                                                                                                                                                                                                                                                                                                                                                                                                                                                                                                                                                                                                                                                                                                                                                                                                                                                                                                                                                                                                                                                                                                                                                                                                                                                                 |
| EPI_ISL_2674157,<br>EPI_ISL_2693564,<br>EPI_ISL_3386593,<br>EPI_ISL_3652165                                                                                                                                                                                                                                                                                         | Klinika za infektivne bolesti "Dr. Fran Mihajević"                                                       | Hrvatski zavod za javno zdravstvo                                                                                              | Irena Tabain; Ivana Ferenčak                                                                                                                                                                                                                                                                                                                                                                                                                                                                                                                                                                                                                                                                                                                                                                                                                                                                                                                                                                                                                                                                                                                                                                                                                                                                                                                                                                                                                                                                                                                                                                                                                                                                                      |
| EPI_ISL_2400376<br>EPI_ISL_1008418                                                                                                                                                                                                                                                                                                                                  | Klinisch Laboratorium ZNA<br>Klinisk mikrobiologi                                                        | Klinisch Laboratorium ZNA<br>The Public Health Agency of Sweden                                                                | Verstrepen et al.<br>Anna Risberg; Anna-Malin Linde; Carlo Berg; Karin Tegmark-Wisell; Maria Lind Karlberg; Mattias Haukland; Mia Brytting; Noura Walai; Oskar Karlsson Lindsjö; Petra Edquist; Petra Holmstrom; Reza Advani; Sofia Stamouli                                                                                                                                                                                                                                                                                                                                                                                                                                                                                                                                                                                                                                                                                                                                                                                                                                                                                                                                                                                                                                                                                                                                                                                                                                                                                                                                                                                                                                                                      |
| EPI_ISL_3333236<br>EPI_ISL_3333581                                                                                                                                                                                                                                                                                                                                  | Kota Bharu Public Health Laboratory                                                                      | Institute for Medical Research, Infectious Disease Research Centre, National Institutes of Health, Ministry of Health Malaysia | Anasir MI; Azizan MA; Kamel K; Mohd Zawawi Z; Ramly N; Robert F; Suppiah J; Thayan R                                                                                                                                                                                                                                                                                                                                                                                                                                                                                                                                                                                                                                                                                                                                                                                                                                                                                                                                                                                                                                                                                                                                                                                                                                                                                                                                                                                                                                                                                                                                                                                                                              |
| EPI_ISL_515182                                                                                                                                                                                                                                                                                                                                                      | Kumasi Centre for Collaborative Research in Tropical Medicine, Kumasi.                                   | Institute of Virology, Charité – Universitätsmedizin Berlin                                                                    | Augustina Sylverken; Christian Drosten; Eric Adu; Jesse Addo Asamoah; Julia Schneider; Jörn Beheim-Schwarzbach; Michael Owusu; Philip El-Duah; Richard Phillips.; Richmond Gorman; Richmond Yeboah; Sherihane Aryeetey; Victor Max Corman                                                                                                                                                                                                                                                                                                                                                                                                                                                                                                                                                                                                                                                                                                                                                                                                                                                                                                                                                                                                                                                                                                                                                                                                                                                                                                                                                                                                                                                                         |
| EPI_ISL_2289468<br>EPI_ISL_3206996                                                                                                                                                                                                                                                                                                                                  | LABORATOIRE DE BIOLOGIE MEDICALE<br>LABORATOIRE d'ANALYSES de BIOLOGIE MEDICALES                         | CNR Virus des Infections Respiratoires - France SUD<br>CNR Virus des Infections Respiratoires - France SUD                     | Antonin Bal; Bruno Lina; Gregory Destras; Gwendolyne Burfin; Hadrien Regue; Laurence Josset; Martine Valette; Quentin Semanas<br>Antonin Bal; Bruno Lina; Gregory Destras; Gwendolyne Burfin; Hadrien Regue; Laurence Josset; Martine Valette; Quentin Semanas                                                                                                                                                                                                                                                                                                                                                                                                                                                                                                                                                                                                                                                                                                                                                                                                                                                                                                                                                                                                                                                                                                                                                                                                                                                                                                                                                                                                                                                    |
| EPI_ISL_918534                                                                                                                                                                                                                                                                                                                                                      | LACEN - Laboratório Central de Saúde Pública do Amazonas                                                 | Evandro Chagas Institute                                                                                                       | A.M.; Barbagelata; E.C.; E.M.A.; Ferreira; J.A.; Junior; K.C.; L.C.; L.S.; M.C.; P.S.; Pinheiro; Santos; Silva; Sousa; Sousa Junior; W.D.C.; da Silva                                                                                                                                                                                                                                                                                                                                                                                                                                                                                                                                                                                                                                                                                                                                                                                                                                                                                                                                                                                                                                                                                                                                                                                                                                                                                                                                                                                                                                                                                                                                                             |
| EPI_ISL_717899                                                                                                                                                                                                                                                                                                                                                      | LACEN RJ - Noel Nutels                                                                                   | Bioinformatics Laboratory / LNCC                                                                                               | Alexandra L Gerber; Amílcar Tanuri; Ana Paula de C Guimarães; Ana Tereza R de Vasconcelos; Andréa Cony Cavalcanti; Carolina M Voloch; Claudia dos Santos Rodrigues; Cynthia C Cardoso; Diana Mariani; Luiz G P de Almeida; Otavio Bustrolini; Ronaldo da Silva F Jr; Terezinha M P P Castiêira                                                                                                                                                                                                                                                                                                                                                                                                                                                                                                                                                                                                                                                                                                                                                                                                                                                                                                                                                                                                                                                                                                                                                                                                                                                                                                                                                                                                                    |
| EPI_ISL_3134695,<br>EPI_ISL_3134856,<br>EPI_ISL_3705132                                                                                                                                                                                                                                                                                                             | LACEN/PE                                                                                                 | WallauLab on behalf of Fiocruz COVID-19 Genomic Surveillance Network                                                           | Alexandre Freitas da Silva; Cassia Docena; Constância Flávia Junqueira Ayres; Filipe Zimmer Dezordi; Gabriel Luz Wallau; Gustavo Barbosa de Lima; Lais Ceschini Machado; Lilian Carolyn Amorim Silva; Marcelo Henrique dos Santos Paiva; Matheus Filgueira Bezerra; Sinval Pinto Brandão Filho                                                                                                                                                                                                                                                                                                                                                                                                                                                                                                                                                                                                                                                                                                                                                                                                                                                                                                                                                                                                                                                                                                                                                                                                                                                                                                                                                                                                                    |
| EPI_ISL_3149320                                                                                                                                                                                                                                                                                                                                                     | LANIIA                                                                                                   | LANIIA-Nayarit                                                                                                                 | ; Alejandra García-Gasca; Alejandra Hernández-Terán; Alejandro Sánchez-Flores; Alfredo Herrera-Estrella; Alicia Ocaña-Mondragón; Andreu Comas-García; Angel Gustavo Salas-Lais; Antonio Loza Román; Bernardo Martínez-Miguel; Blanca Taboada; Brenda Irasema Maldonado-Meza; Bruno Gómez-Gil; Carla Ivón Herrera-Najera; Carlos Eduardo Covantes-Rosales; Carlos F. Arias; Celia Boukadida; Clara Esperanza Santacruz-Tinoco; Concepción Grajales-Muñiz; Consorcio Mexicano de Vigilancia Genómica (CoVGen-Mex). Authors (in alphabetical order): Julio Elias Alvarado-Yaah; Cristóbal Cháidez-Quiróz; Célida Duque Molina; Célida Martínez- Rodríguez; Daniel Alberto Girón Pérez; Daniel Fregoso-Rueda; Daniel Lira Morales; Eduardo Becerril-Vargas; Fernando Fontove-Herrera; Fidencio Mejía-Nepomuceno; Francisco Pulido; Gloria Elena Espinosa-Ayala; Gloria María Molina-Salinas; Gloria Vazquez; Hector Esteban Paz-Juárez; Hector Montoya-Fuentes; Helen Haydee Fernandez-Pascencia; Irvin González-López; Jean Pierre González-Pérez; Jean Armando Vázquez-Pérez; LANNIA Nayarit; Manuel Ivan Girón Pérez; Jorge Salas-Hernández; José Antonio Enciso-Moreno; José Arturo Martínez-Orozco; José de Jesús Nuñez-Contreras; Juan Bautista Chale-Ozúl; Juliisa Enciso-Ibarra; Luis Alberto Ochoa-Carrera; Margarita Matías-Florentino; Mario Mújica-Sánchez; Marissa Perez-García; María Guadalupe Santiago-Mauricio; María Guadalupe de Jesús Mireles-Rivera; Nelly Sélem-Mojica; Pavel Isa; Ricardo Ciria Merce; Ricardo Grande; Rosa María Gutiérrez Rios; Santiago Avila-Rios; Selene Zárate; Susana Lopez; Ulises Mercado.; Verónica Mata-Haro; Víctor Eduardo García-Arias; Victor Hugo Borja-Aburto |
| EPI_ISL_861870,<br>EPI_ISL_3010881,<br>EPI_ISL_3010906,<br>EPI_ISL_3267996                                                                                                                                                                                                                                                                                          | LATE - Laboratório de Técnicas Especiais - Hospital Israelita Albert Einstein                            | LATE - Laboratório de Técnicas Especiais - Hospital Israelita Albert Einstein                                                  | Alexandre Hideaki Takara; Ana Paula Moreira Salles; Anelisie da Silva Santos; Deyvid Amgarten; Erick Gustavo Dorllass; Fernanda de Mello Malta; João Renato Rebello Pinho; Marcio Anunciacao Menezes; Pedro Henrique Sebe Rodrigues; Raquel Riyuzo                                                                                                                                                                                                                                                                                                                                                                                                                                                                                                                                                                                                                                                                                                                                                                                                                                                                                                                                                                                                                                                                                                                                                                                                                                                                                                                                                                                                                                                                |
| EPI_ISL_3132167,<br>EPI_ISL_3132169,<br>EPI_ISL_3132170,<br>EPI_ISL_3132171                                                                                                                                                                                                                                                                                         | LCSP                                                                                                     | IICS-UNA                                                                                                                       | Adriana Valenzuela; Alejandra Rojas; Andrea Gomez de la Fuente; Andrea Ojeda; Chyntia Diaz; Cynthia Vazquez; Eva Nara; Fatima Cardozo; Florencia del Puerto; Guillermo Sequera.; Joel Ortiz; Jonas Fernandez; Juan Torales; Laura Franco; Leticia Rojas; Magaly Martinez; Maria Eugenia Galeano; Maria Liz Gamarra; Shirley Villalba                                                                                                                                                                                                                                                                                                                                                                                                                                                                                                                                                                                                                                                                                                                                                                                                                                                                                                                                                                                                                                                                                                                                                                                                                                                                                                                                                                              |
| EPI_ISL_1091785,<br>EPI_ISL_1091786                                                                                                                                                                                                                                                                                                                                 | LDSP                                                                                                     | Universidad Nacional de Colombia - Laboratorio Genómico One Health                                                             | Andres F. Cardona-Rios; Carlos Franco-Muñoz; Daniel O. Maldonado-Perez; Diego A. Álvarez-Díaz; Idabely Betancur Ortiz; Jorge E. Osorio; Juan P. Hernandez-Ortiz; Karl A Ciuderis; Laura Silvana Perez; Marcela Mercado-Reyes; María Angélica Maya; Sandra Ines Cano                                                                                                                                                                                                                                                                                                                                                                                                                                                                                                                                                                                                                                                                                                                                                                                                                                                                                                                                                                                                                                                                                                                                                                                                                                                                                                                                                                                                                                               |

|                                                                                                                                                                                                                                                                                                                                                                                                   |                                                                                                               |                                                                                                                                                                                                                    |                                                                                                                                                                                                                                                                                                                                                                                                                                                                                                                                                                                                                                                             |
|---------------------------------------------------------------------------------------------------------------------------------------------------------------------------------------------------------------------------------------------------------------------------------------------------------------------------------------------------------------------------------------------------|---------------------------------------------------------------------------------------------------------------|--------------------------------------------------------------------------------------------------------------------------------------------------------------------------------------------------------------------|-------------------------------------------------------------------------------------------------------------------------------------------------------------------------------------------------------------------------------------------------------------------------------------------------------------------------------------------------------------------------------------------------------------------------------------------------------------------------------------------------------------------------------------------------------------------------------------------------------------------------------------------------------------|
| EPI_ISL_2827783                                                                                                                                                                                                                                                                                                                                                                                   | LDSP - CAQUETA HOSPITAL MALVINAS                                                                              | Instituto Nacional de Salud- Dirección de Investigación en Salud Pública                                                                                                                                           | Carlos Franco-Muñoz; Carmen Osorio; Diana Malo; Diego A. Álvarez-Díaz; Diego Andrés Prada; Gerardo Santamaría; Hector Alejandro Ruiz-Moreno; Jhonnatan Reales-González; Jorge Rivera; Juan Camilo Martínez; Julian Naizaque; Katherine Laiton-Donato; Lisseth Pardo; Magdalena Wiesner; Marcela Mercado-Reyes; María T. Herrera-Sepúlveda; Marta Lopez Blanco; Martha Lucia Ospina Martínez; Paola Rojas; Sergio Gomez; Sheryll Corchuelo; Ángela Alarcon Cruz                                                                                                                                                                                              |
| EPI_ISL_3459400                                                                                                                                                                                                                                                                                                                                                                                   | LDSP CESAR                                                                                                    | Instituto Nacional de Salud                                                                                                                                                                                        | Carlos Franco-Muñoz; Carmen Osorio; Diana Malo; Diego A. Álvarez-Díaz; Diego Andrés Prada; Gerardo Santamaría; Hector Alejandro Ruiz-Moreno; Jhonnatan Reales-González; Jorge Rivera; Juan Camilo Martínez; Julian Naizaque; Katherine Laiton-Donato; Lisseth Pardo; Magdalena Wiesner; Marcela Mercado-Reyes; María T. Herrera-Sepúlveda; Marta Lopez Blanco; Martha Lucia Ospina Martínez; Paola Rojas; Sergio Gomez; Sheryll Corchuelo; Ángela Alarcon Cruz                                                                                                                                                                                              |
| EPI_ISL_3320741                                                                                                                                                                                                                                                                                                                                                                                   | LDSP Casanare                                                                                                 | Instituto Nacional de Salud                                                                                                                                                                                        | Carlos Franco-Muñoz; Carmen Osorio; Diana Malo; Diego A. Álvarez-Díaz; Diego Andrés Prada; Gerardo Santamaría; Hector Alejandro Ruiz-Moreno; Jhonnatan Reales-González; Jorge Rivera; Juan Camilo Martínez; Julian Naizaque; Katherine Laiton-Donato; Lisseth Pardo; Magdalena Wiesner; Marcela Mercado-Reyes; María T. Herrera-Sepúlveda; Marta Lopez Blanco; Martha Lucia Ospina Martínez; Paola Rojas; Sergio Gomez; Sheryll Corchuelo; Ángela Alarcon Cruz                                                                                                                                                                                              |
| EPI_ISL_2674294, EPI_ISL_2674295                                                                                                                                                                                                                                                                                                                                                                  | LDSP LETICIA                                                                                                  | Instituto Nacional de Salud- Dirección de Investigación en Salud Pública                                                                                                                                           | Carlos Franco-Muñoz; Carmen Osorio; Diana Malo; Diego A. Álvarez-Díaz; Diego Andrés Prada; Gerardo Santamaría; Hector Alejandro Ruiz-Moreno; Jhonnatan Reales-González; Jorge Rivera; Juan Camilo Martínez; Julian Naizaque; Katherine Laiton-Donato; Lisseth Pardo; Magdalena Wiesner; Marcela Mercado-Reyes; María T. Herrera-Sepúlveda; Marta Lopez Blanco; Martha Lucia Ospina Martínez; Paola Rojas; Sergio Gomez; Sheryll Corchuelo; Ángela Alarcon Cruz                                                                                                                                                                                              |
| EPI_ISL_1582987                                                                                                                                                                                                                                                                                                                                                                                   | LDSP VICHADA                                                                                                  | Instituto Nacional de Salud- Dirección de Investigación en Salud Pública                                                                                                                                           | Carlos Franco-Muñoz; Carmen Osorio; Diana Malo; Diego A. Álvarez-Díaz; Diego Andrés Prada; Gerardo Santamaría; Hector Alejandro Ruiz-Moreno; Jhonnatan Reales-González; Juan Camilo Martínez; Julian Naizaque; Katherine Laiton-Donato; Lisseth Pardo; Magdalena Wiesner; Marcela Mercado-Reyes; María T. Herrera-Sepúlveda; Marta Lopez Blanco; Martha Lucia Ospina Martínez; Paola Rojas; Sergio Gomez; Sheryll Corchuelo; Ángela Alarcon Cruz                                                                                                                                                                                                            |
| EPI_ISL_3074007                                                                                                                                                                                                                                                                                                                                                                                   | LEBOWAKGOMO LABORATORY                                                                                        | National Institute for Communicable Diseases of the National Health Laboratory Service                                                                                                                             | Amoako DG; Bhiman JN; Everatt J; Ismail A; Mahlangu B; Mnguni A; Mohale T; Ntuli N; Scheepers C                                                                                                                                                                                                                                                                                                                                                                                                                                                                                                                                                             |
| EPI_ISL_2455934, EPI_ISL_2861186, EPI_ISL_3265406                                                                                                                                                                                                                                                                                                                                                 | LESP Aguascalientes                                                                                           | Instituto de Diagnostico y Referencia Epidemiologicos (INDRE)                                                                                                                                                      | Abril Rodriguez-Maldonado; Ariadna Medina-Benitez; Claudia Wong-Arambula; Ernesto Ramirez-Gonzalez.; Gisela Barrera-Badillo; Irma Lopez-Martinez; Joaquin Quiroz-Mercado; Lucia Hernandez-Rivas; Maribel Gonzalez-Villa; Natividad Cruz-Ortiz; Sergio Rangel-Guerrero; Tatiana Nunez-Garcia; Vanessa Rivero-Arredondo                                                                                                                                                                                                                                                                                                                                       |
| EPI_ISL_2443047, EPI_ISL_2545807, EPI_ISL_2920685                                                                                                                                                                                                                                                                                                                                                 | LESP Baja California                                                                                          | Instituto de Diagnostico y Referencia Epidemiologicos (INDRE)                                                                                                                                                      | Abril Rodriguez-Maldonado; Ariadna Medina-Benitez; Claudia Wong-Arambula; Ernesto Ramirez-Gonzalez.; Gisela Barrera-Badillo; Irma Lopez-Martinez; Joaquin Quiroz-Mercado; Lucia Hernandez-Rivas; Natividad Cruz-Ortiz; Sergio Rangel-Guerrero; Tatiana Nunez-Garcia; Vanessa Rivero-Arredondo                                                                                                                                                                                                                                                                                                                                                               |
| EPI_ISL_1651891, EPI_ISL_2937848                                                                                                                                                                                                                                                                                                                                                                  | LESP Baja California Sur                                                                                      | Instituto de Diagnostico y Referencia Epidemiologicos (INDRE)                                                                                                                                                      | Abril Rodriguez-Maldonado; Ariadna Medina-Benitez; Claudia Wong-Arambula; Ernesto Ramirez-Gonzalez.; Gisela Barrera-Badillo; Irma Lopez-Martinez; Joaquin Quiroz-Mercado; Lucia Hernandez-Rivas; Maribel Gonzalez-Villa; Natividad Cruz-Ortiz; Sergio Rangel-Guerrero; Tatiana Nunez-Garcia; Vanessa Rivero-Arredondo                                                                                                                                                                                                                                                                                                                                       |
| EPI_ISL_1400299, EPI_ISL_2545806                                                                                                                                                                                                                                                                                                                                                                  | LESP Campeche                                                                                                 | Instituto de Diagnostico y Referencia Epidemiologicos (INDRE)                                                                                                                                                      | Abril Rodriguez-Maldonado; Ariadna Medina-Benitez; Claudia Wong-Arambula; Ernesto Ramirez-Gonzalez.; Gisela Barrera-Badillo; Irma Lopez-Martinez; Joaquin Quiroz-Mercado; Lucia Hernandez-Rivas; Natividad Cruz-Ortiz; Sergio Rangel-Guerrero; Tatiana Nunez-Garcia; Vanessa Rivero-Arredondo                                                                                                                                                                                                                                                                                                                                                               |
| EPI_ISL_2492489                                                                                                                                                                                                                                                                                                                                                                                   | LESP Chiapas                                                                                                  | Instituto de Diagnostico y Referencia Epidemiologicos (INDRE)                                                                                                                                                      | Abril Rodriguez-Maldonado; Ariadna Medina-Benitez; Claudia Wong-Arambula; Ernesto Ramirez-Gonzalez.; Gisela Barrera-Badillo; Irma Lopez-Martinez; Joaquin Quiroz-Mercado; Lucia Hernandez-Rivas; Natividad Cruz-Ortiz; Sergio Rangel-Guerrero; Tatiana Nunez-Garcia; Vanessa Rivero-Arredondo                                                                                                                                                                                                                                                                                                                                                               |
| EPI_ISL_2674699                                                                                                                                                                                                                                                                                                                                                                                   | LESP Chihuahua                                                                                                | Instituto de Diagnostico y Referencia Epidemiologicos (INDRE)                                                                                                                                                      | Abril Rodriguez-Maldonado; Ariadna Medina-Benitez; Claudia Wong-Arambula; Ernesto Ramirez-Gonzalez.; Gisela Barrera-Badillo; Irma Lopez-Martinez; Joaquin Quiroz-Mercado; Lucia Hernandez-Rivas; Natividad Cruz-Ortiz; Sergio Rangel-Guerrero; Tatiana Nunez-Garcia; Vanessa Rivero-Arredondo                                                                                                                                                                                                                                                                                                                                                               |
| EPI_ISL_2283707                                                                                                                                                                                                                                                                                                                                                                                   | LESP Ciudad de Mexico                                                                                         | Instituto de Diagnostico y Referencia Epidemiologicos (INDRE)                                                                                                                                                      | Abril Rodriguez-Maldonado; Ariadna Medina-Benitez; Claudia Wong-Arambula; Ernesto Ramirez-Gonzalez.; Gisela Barrera-Badillo; Irma Lopez-Martinez; Joaquin Quiroz-Mercado; Lucia Hernandez-Rivas; Natividad Cruz-Ortiz; Sergio Rangel-Guerrero; Tatiana Nunez-Garcia; Vanessa Rivero-Arredondo                                                                                                                                                                                                                                                                                                                                                               |
| EPI_ISL_2663345, EPI_ISL_3459926                                                                                                                                                                                                                                                                                                                                                                  | LESP Colima                                                                                                   | Instituto de Diagnostico y Referencia Epidemiologicos (INDRE)                                                                                                                                                      | Abril Rodriguez-Maldonado; Ariadna Medina-Benitez; Claudia Wong-Arambula; Ernesto Ramirez-Gonzalez.; Gisela Barrera-Badillo; Irma Lopez-Martinez; Joaquin Quiroz-Mercado; Lucia Hernandez-Rivas; Maribel Gonzalez-Villa; Natividad Cruz-Ortiz; Sergio Rangel-Guerrero; Tatiana Nunez-Garcia; Vanessa Rivero-Arredondo                                                                                                                                                                                                                                                                                                                                       |
| EPI_ISL_3265625                                                                                                                                                                                                                                                                                                                                                                                   | LESP Estado de Mexico                                                                                         | Instituto de Diagnostico y Referencia Epidemiologicos (INDRE)                                                                                                                                                      | Abril Rodriguez-Maldonado; Ariadna Medina-Benitez; Claudia Wong-Arambula; Ernesto Ramirez-Gonzalez.; Gisela Barrera-Badillo; Irma Lopez-Martinez; Joaquin Quiroz-Mercado; Lucia Hernandez-Rivas; Maribel Gonzalez-Villa; Natividad Cruz-Ortiz; Sergio Rangel-Guerrero; Tatiana Nunez-Garcia; Vanessa Rivero-Arredondo                                                                                                                                                                                                                                                                                                                                       |
| EPI_ISL_2341009, EPI_ISL_2674694, EPI_ISL_3460199                                                                                                                                                                                                                                                                                                                                                 | LESP Guanajuato                                                                                               | Instituto de Diagnostico y Referencia Epidemiologicos (INDRE)                                                                                                                                                      | Abril Rodriguez-Maldonado; Ariadna Medina-Benitez; Claudia Wong-Arambula; Ernesto Ramirez-Gonzalez.; Gisela Barrera-Badillo; Irma Lopez-Martinez; Joaquin Quiroz-Mercado; Lucia Hernandez-Rivas; Maribel Gonzalez-Villa; Natividad Cruz-Ortiz; Sergio Rangel-Guerrero; Tatiana Nunez-Garcia; Vanessa Rivero-Arredondo                                                                                                                                                                                                                                                                                                                                       |
| EPI_ISL_3768986                                                                                                                                                                                                                                                                                                                                                                                   | LESP Guerrero                                                                                                 | Instituto de Diagnostico y Referencia Epidemiologicos (INDRE)                                                                                                                                                      | Abril Rodriguez-Maldonado; Ariadna Medina-Benitez; Claudia Wong-Arambula; Ernesto Ramirez-Gonzalez.; Gisela Barrera-Badillo; Irma Lopez-Martinez; Joaquin Quiroz-Mercado; Lucia Hernandez-Rivas; Maribel Gonzalez-Villa; Natividad Cruz-Ortiz; Sergio Rangel-Guerrero; Tatiana Nunez-Garcia; Vanessa Rivero-Arredondo                                                                                                                                                                                                                                                                                                                                       |
| EPI_ISL_2859012, EPI_ISL_3265336                                                                                                                                                                                                                                                                                                                                                                  | LESP Hidalgo                                                                                                  | Instituto de Diagnostico y Referencia Epidemiologicos (INDRE)                                                                                                                                                      | Abril Rodriguez-Maldonado; Ariadna Medina-Benitez; Claudia Wong-Arambula; Ernesto Ramirez-Gonzalez.; Gisela Barrera-Badillo; Irma Lopez-Martinez; Joaquin Quiroz-Mercado; Lucia Hernandez-Rivas; Maribel Gonzalez-Villa; Natividad Cruz-Ortiz; Sergio Rangel-Guerrero; Tatiana Nunez-Garcia; Vanessa Rivero-Arredondo                                                                                                                                                                                                                                                                                                                                       |
| EPI_ISL_2496023, EPI_ISL_3460026                                                                                                                                                                                                                                                                                                                                                                  | LESP Jalisco                                                                                                  | Instituto de Diagnostico y Referencia Epidemiologicos (INDRE)                                                                                                                                                      | Abril Rodriguez-Maldonado; Ariadna Medina-Benitez; Claudia Wong-Arambula; Ernesto Ramirez-Gonzalez.; Gisela Barrera-Badillo; Irma Lopez-Martinez; Joaquin Quiroz-Mercado; Lucia Hernandez-Rivas; Maribel Gonzalez-Villa; Natividad Cruz-Ortiz; Sergio Rangel-Guerrero; Tatiana Nunez-Garcia; Vanessa Rivero-Arredondo                                                                                                                                                                                                                                                                                                                                       |
| EPI_ISL_2246832                                                                                                                                                                                                                                                                                                                                                                                   | LESP Michoacan                                                                                                | Instituto de Diagnostico y Referencia Epidemiologicos (INDRE)                                                                                                                                                      | Abril Rodriguez-Maldonado; Ariadna Medina-Benitez; Claudia Wong-Arambula; Ernesto Ramirez-Gonzalez.; Gisela Barrera-Badillo; Irma Lopez-Martinez; Joaquin Quiroz-Mercado; Lucia Hernandez-Rivas; Natividad Cruz-Ortiz; Sergio Rangel-Guerrero; Tatiana Nunez-Garcia; Vanessa Rivero-Arredondo                                                                                                                                                                                                                                                                                                                                                               |
| EPI_ISL_2341014                                                                                                                                                                                                                                                                                                                                                                                   | LESP Morelos                                                                                                  | Instituto de Diagnostico y Referencia Epidemiologicos (INDRE)                                                                                                                                                      | Abril Rodriguez-Maldonado; Ariadna Medina-Benitez; Claudia Wong-Arambula; Ernesto Ramirez-Gonzalez.; Gisela Barrera-Badillo; Irma Lopez-Martinez; Joaquin Quiroz-Mercado; Lucia Hernandez-Rivas; Natividad Cruz-Ortiz; Sergio Rangel-Guerrero; Tatiana Nunez-Garcia; Vanessa Rivero-Arredondo                                                                                                                                                                                                                                                                                                                                                               |
| EPI_ISL_2495934, EPI_ISL_3033452                                                                                                                                                                                                                                                                                                                                                                  | LESP Nuevo Leon                                                                                               | Instituto de Diagnostico y Referencia Epidemiologicos (INDRE)                                                                                                                                                      | Abril Rodriguez-Maldonado; Ariadna Medina-Benitez; Claudia Wong-Arambula; Ernesto Ramirez-Gonzalez.; Gisela Barrera-Badillo; Irma Lopez-Martinez; Joaquin Quiroz-Mercado; Lucia Hernandez-Rivas; Maribel Gonzalez-Villa; Natividad Cruz-Ortiz; Sergio Rangel-Guerrero; Tatiana Nunez-Garcia; Vanessa Rivero-Arredondo                                                                                                                                                                                                                                                                                                                                       |
| EPI_ISL_2492457, EPI_ISL_2559314, EPI_ISL_3459974                                                                                                                                                                                                                                                                                                                                                 | LESP Queretaro                                                                                                | Instituto de Diagnostico y Referencia Epidemiologicos (INDRE)                                                                                                                                                      | Abril Rodriguez-Maldonado; Ariadna Medina-Benitez; Claudia Wong-Arambula; Ernesto Ramirez-Gonzalez.; Gisela Barrera-Badillo; Irma Lopez-Martinez; Joaquin Quiroz-Mercado; Lucia Hernandez-Rivas; Maribel Gonzalez-Villa; Natividad Cruz-Ortiz; Sergio Rangel-Guerrero; Tatiana Nunez-Garcia; Vanessa Rivero-Arredondo                                                                                                                                                                                                                                                                                                                                       |
| EPI_ISL_2246836, EPI_ISL_2340875, EPI_ISL_3265419                                                                                                                                                                                                                                                                                                                                                 | LESP Sinaloa                                                                                                  | Instituto de Diagnostico y Referencia Epidemiologicos (INDRE)                                                                                                                                                      | Abril Rodriguez-Maldonado; Ariadna Medina-Benitez; Claudia Wong-Arambula; Ernesto Ramirez-Gonzalez.; Gisela Barrera-Badillo; Irma Lopez-Martinez; Joaquin Quiroz-Mercado; Lucia Hernandez-Rivas; Maribel Gonzalez-Villa; Natividad Cruz-Ortiz; Sergio Rangel-Guerrero; Tatiana Nunez-Garcia; Vanessa Rivero-Arredondo                                                                                                                                                                                                                                                                                                                                       |
| EPI_ISL_2545812                                                                                                                                                                                                                                                                                                                                                                                   | LESP Sonora                                                                                                   | Instituto de Diagnostico y Referencia Epidemiologicos (INDRE)                                                                                                                                                      | Abril Rodriguez-Maldonado; Ariadna Medina-Benitez; Claudia Wong-Arambula; Ernesto Ramirez-Gonzalez.; Gisela Barrera-Badillo; Irma Lopez-Martinez; Joaquin Quiroz-Mercado; Lucia Hernandez-Rivas; Natividad Cruz-Ortiz; Sergio Rangel-Guerrero; Tatiana Nunez-Garcia; Vanessa Rivero-Arredondo                                                                                                                                                                                                                                                                                                                                                               |
| EPI_ISL_2859048                                                                                                                                                                                                                                                                                                                                                                                   | LESP Tabasco                                                                                                  | Instituto de Diagnostico y Referencia Epidemiologicos (INDRE)                                                                                                                                                      | Abril Rodriguez-Maldonado; Ariadna Medina-Benitez; Claudia Wong-Arambula; Ernesto Ramirez-Gonzalez.; Gisela Barrera-Badillo; Irma Lopez-Martinez; Joaquin Quiroz-Mercado; Lucia Hernandez-Rivas; Maribel Gonzalez-Villa; Natividad Cruz-Ortiz; Sergio Rangel-Guerrero; Tatiana Nunez-Garcia; Vanessa Rivero-Arredondo                                                                                                                                                                                                                                                                                                                                       |
| EPI_ISL_2545691, EPI_ISL_2559281                                                                                                                                                                                                                                                                                                                                                                  | LESP Tamaulipas                                                                                               | Instituto de Diagnostico y Referencia Epidemiologicos (INDRE)                                                                                                                                                      | Abril Rodriguez-Maldonado; Ariadna Medina-Benitez; Claudia Wong-Arambula; Ernesto Ramirez-Gonzalez.; Gisela Barrera-Badillo; Irma Lopez-Martinez; Joaquin Quiroz-Mercado; Lucia Hernandez-Rivas; Natividad Cruz-Ortiz; Sergio Rangel-Guerrero; Tatiana Nunez-Garcia; Vanessa Rivero-Arredondo                                                                                                                                                                                                                                                                                                                                                               |
| EPI_ISL_2937845                                                                                                                                                                                                                                                                                                                                                                                   | LESP Tlaxcala                                                                                                 | Instituto de Diagnostico y Referencia Epidemiologicos (INDRE)                                                                                                                                                      | Abril Rodriguez-Maldonado; Ariadna Medina-Benitez; Claudia Wong-Arambula; Ernesto Ramirez-Gonzalez.; Gisela Barrera-Badillo; Irma Lopez-Martinez; Joaquin Quiroz-Mercado; Lucia Hernandez-Rivas; Maribel Gonzalez-Villa; Natividad Cruz-Ortiz; Sergio Rangel-Guerrero; Tatiana Nunez-Garcia; Vanessa Rivero-Arredondo                                                                                                                                                                                                                                                                                                                                       |
| EPI_ISL_2545756, EPI_ISL_2779133                                                                                                                                                                                                                                                                                                                                                                  | LESP Yucatan                                                                                                  | Instituto de Diagnostico y Referencia Epidemiologicos (INDRE)                                                                                                                                                      | Abril Rodriguez-Maldonado; Ariadna Medina-Benitez; Claudia Wong-Arambula; Ernesto Ramirez-Gonzalez.; Gisela Barrera-Badillo; Irma Lopez-Martinez; Joaquin Quiroz-Mercado; Lucia Hernandez-Rivas; Maribel Gonzalez-Villa; Natividad Cruz-Ortiz; Sergio Rangel-Guerrero; Tatiana Nunez-Garcia; Vanessa Rivero-Arredondo                                                                                                                                                                                                                                                                                                                                       |
| EPI_ISL_2229365, EPI_ISL_2249090                                                                                                                                                                                                                                                                                                                                                                  | LSUHS Emerging Viral Threat Laboratory<br>Lab La Salete Robles - VN Famalicao                                 | LSUHS Emerging Viral Threat Laboratory<br>Instituto Nacional de Saude (INSA) and Institute of Biomedicine (iBiMed), Universidade de Aveiro                                                                         | Alexander Mijalis; Andrew D. Yurochko; Christopher G. Kevill; Gregory L. Ware; Jennifer L. Carroll; Jeremy P. Kamil; John A. Vanchiere; Maarten Van Diest; Rona S. Scott<br>Borges et al                                                                                                                                                                                                                                                                                                                                                                                                                                                                    |
| EPI_ISL_982296, EPI_ISL_1532923, EPI_ISL_2192355, EPI_ISL_2861474, EPI_ISL_3868444, EPI_ISL_3868984                                                                                                                                                                                                                                                                                               | Lab voor klinische biologie                                                                                   | Lab voor klinische biologie                                                                                                                                                                                        | Bruno Verhasselt; Hannelore Hamerlinck; Marija Janevska                                                                                                                                                                                                                                                                                                                                                                                                                                                                                                                                                                                                     |
| EPI_ISL_2275868                                                                                                                                                                                                                                                                                                                                                                                   | Lab. Microbiologia e Virologia Cotugno A.O. dei Colli - Istituto Zooprofilattico Sperimentale del Mezzogiorno | TIGEM                                                                                                                                                                                                              | Antonio Grimaldi; Patrizia Annunziata Francesco Panariello Biancamaria Pierri Claudia Tiberio Teresa Giuliano Valentina Bouche Chiara Colantuono Maria Concetta Cuomo Denise Di Concilio Lucio Di Filippo Anna Manfredi Marcello Salvi Antonio Limone Luigi Atripaldi Pellegrino Cerino<br>Andrea Ballabio Davide Cacchiarelli                                                                                                                                                                                                                                                                                                                              |
| EPI_ISL_579097, EPI_ISL_626352, EPI_ISL_661263, EPI_ISL_755631, EPI_ISL_1016867, EPI_ISL_1315309, EPI_ISL_1621295, EPI_ISL_1967897, EPI_ISL_2103201, EPI_ISL_2103202, EPI_ISL_2406489, EPI_ISL_2650016, EPI_ISL_2811955, EPI_ISL_2811957, EPI_ISL_2964925, EPI_ISL_2964932, EPI_ISL_2964935, EPI_ISL_3164081, EPI_ISL_3164087, EPI_ISL_3164124, EPI_ISL_3477096, EPI_ISL_3477098, EPI_ISL_3709079 | see above                                                                                                     | LabPLUS                                                                                                                                                                                                            | Anja Werner; Antje van der Linden; Arlo Upton; Chris Mansell; David Hammer; Dragana Drinkovic; Erasmus Smit; Gary McAuliffe; Hana Sofia Andersson; Hermes Perez; James Ussher; Jill Sherwood; Jing Wang; Joep de Ligt; Josh Freeman; Julia Howard; Juliet Elvy; Lauren Jelly; Mary DeAlmeida; Matt Blakiston; Matt Storey; Matthew Rogers; Max Bloomfield; Michael Addidie; Michelle Balm; Muhammad Faisal; Nikki Freed; Olin Silander; Olivia Stroeven; Rachel Boyle; Sally Roberts; SallyAnn Harbison; Sarah Jefferies; Sharmini Muttaiyah; Susan Morpeth; Susan Taylor; Timothy Blackmore; Vani Sathyendran; Veronica Playle; Virginia Hope; Xiaoyun Ren |
| EPI_ISL_548105                                                                                                                                                                                                                                                                                                                                                                                    | EPI_ISL_548105                                                                                                | LabTests                                                                                                                                                                                                           | Anja Werner; Antje van der Linden; Arlo Upton; Chris Mansell; David Hammer; Dragana Drinkovic; Erasmus Smit; Gary McAuliffe; Hana Sofia Andersson; Hermes Perez; James Ussher; Jill Sherwood; Jing Wang; Joep de Ligt; Josh Freeman; Julia Howard; Juliet Elvy; Lauren Jelly; Mary DeAlmeida; Matt Blakiston; Matt Storey; Matthew Rogers; Max Bloomfield; Michael Addidie; Michelle Balm; Muhammad Faisal; Nikki Freed; Olin Silander; Sally Roberts; Sarah Jefferies; Sharmini Muttaiyah; Susan Morpeth; Susan Taylor; Timothy Blackmore; Vani Sathyendran; Veronica Playle; Virginia Hope; Xiaoyun Ren                                                   |
| EPI_ISL_2445802                                                                                                                                                                                                                                                                                                                                                                                   | Labeto - CAB - Leiria                                                                                         | Instituto Nacional de Saude (INSA)                                                                                                                                                                                 | Borges et al                                                                                                                                                                                                                                                                                                                                                                                                                                                                                                                                                                                                                                                |
| EPI_ISL_1219962, EPI_ISL_2188367, EPI_ISL_2279647, EPI_ISL_2709261, EPI_ISL_2923153, EPI_ISL_3153499, EPI_ISL_3690330, EPI_ISL_3690543, EPI_ISL_3804397                                                                                                                                                                                                                                           | see above                                                                                                     | Labo Analyses Med                                                                                                                                                                                                  | Angela Brisebarre; Anne-Laure Garand; Camille Capel; Christophe Malabat; Claude Jorion; Corinne Maufrais; DURIVAUT Jérôme; Durivaut JÉRÔME; Etienne Simon-Lorière; Frédéric Lemoine; HEYM Beate; Hub Bioinformatique Biostatistiques; Hub de Bioinformatique et Biostatistique; Louise Lefrançois; Marie-HÉLÈNE Gaudon Louveau De La Guigneraie; Marion Barbet; Maud Vanpeene; Méline Bizard; Patricia Tamby; S. Cocco; Sylvie Behilli; Sylvie Van der Werf; Sylvie van der Werf; TAMBY Patricia; Victoire Baillet; Vincent Enouf                                                                                                                           |
| EPI_ISL_2657251                                                                                                                                                                                                                                                                                                                                                                                   | Laboratorium Biologi Molekularnej USK                                                                         | 1. Tricity SARS-CoV-2 sequencing consortium: University of Gdansk, Medical University of Gdansk, Vaxican Ltd., Invicta Ltd. 2. National Institute of Public Health - National Institute of Hygiene, Warsaw, Poland | Celina Cybulska; Karolina Gackowska; Katarzyna Groth; Katarzyna Zacharczuk; Krystyna Bienkowska Szewczyk; Lukasz Rabalski; Maciej Grzybek; Maciej Kosinski; Magdalena Nowakowska; Marcin Lubocki; Malgorzata Sadkowska-Todys; Tomasz Wolkowicz                                                                                                                                                                                                                                                                                                                                                                                                              |



|                                                                                                                                                                                                                                                                                                                                                    |                                                                                                                                                |                                                                                                                                                |                                                                                                                                                                                                                                                                                                                                                                                                                                                                                                                                                                                                                                                                                                                                                                                                                                                                                                                                                                                                                                                                                                                                                                                                                                                                                                                                                                                                                                                                                                                                                                                                                                                                                                       |
|----------------------------------------------------------------------------------------------------------------------------------------------------------------------------------------------------------------------------------------------------------------------------------------------------------------------------------------------------|------------------------------------------------------------------------------------------------------------------------------------------------|------------------------------------------------------------------------------------------------------------------------------------------------|-------------------------------------------------------------------------------------------------------------------------------------------------------------------------------------------------------------------------------------------------------------------------------------------------------------------------------------------------------------------------------------------------------------------------------------------------------------------------------------------------------------------------------------------------------------------------------------------------------------------------------------------------------------------------------------------------------------------------------------------------------------------------------------------------------------------------------------------------------------------------------------------------------------------------------------------------------------------------------------------------------------------------------------------------------------------------------------------------------------------------------------------------------------------------------------------------------------------------------------------------------------------------------------------------------------------------------------------------------------------------------------------------------------------------------------------------------------------------------------------------------------------------------------------------------------------------------------------------------------------------------------------------------------------------------------------------------|
| EPI_ISL_3113147                                                                                                                                                                                                                                                                                                                                    | Labor Berlin Charité Vivantes GmbH / Institut für Virologie                                                                                    | Charité Universitätsmedizin Berlin, Institut für Virologie/Labor Berlin                                                                        | Barbara Mühlemann; Christian Drosten; Christine Stephan; Peter Menzel; Rolf Schwarzer; Terry Jones; Victor M Corman                                                                                                                                                                                                                                                                                                                                                                                                                                                                                                                                                                                                                                                                                                                                                                                                                                                                                                                                                                                                                                                                                                                                                                                                                                                                                                                                                                                                                                                                                                                                                                                   |
| EPI_ISL_2978187, EPI_ISL_2978191, EPI_ISL_2978200, EPI_ISL_2978220, EPI_ISL_2978221, EPI_ISL_2978224, EPI_ISL_2978236                                                                                                                                                                                                                              | see above                                                                                                                                      | Pathogen Genomics Lab, National Institute for Biomedical Research (INRB)                                                                       | Amuri Aziza; Andrew Rambaut; Catherine Pratt; Eddy Kinganda-Lusamaki; Edith Nkwembe; Emmanuel Lokilo Lofiko; Fabien Roch Niama; Francisca Muyembe Mawete; Gabriel Kabamba; Ian Goodfellow; Jean Claude Makangara; Jean-Jacques Muyembe Tarmfum; Josh Quick; Matthias Pauthner; Michael Wiley; Nick Loman; Placide Mbala-Kingebeni; Raphael Lumembe; Steve Ahuka-Mundেকে; Trevor Bedford                                                                                                                                                                                                                                                                                                                                                                                                                                                                                                                                                                                                                                                                                                                                                                                                                                                                                                                                                                                                                                                                                                                                                                                                                                                                                                               |
| EPI_ISL_2157570, EPI_ISL_2492531                                                                                                                                                                                                                                                                                                                   | Laboratoire National de Santé Publique – LNSP (HAITI - LNSP)                                                                                   | Laboratory of Respiratory Viruses and Measles, Oswaldo Cruz Institute, FIOCRUZ                                                                 | Alice Sampaio Rocha; Ana Carolina Mendonça; Anna Carolina Paixao; Elisa Cavalcante Pereira; Fernando Motta; Joêl Journel; Jacques Boncy; Luciana Appolinario; Marilda Siqueira on behalf of the Fiocruz COVID-19 Genomic Surveillance Network; Paola Resende; Patrick Delly; Renata Serrano Lopes; Taina Venas                                                                                                                                                                                                                                                                                                                                                                                                                                                                                                                                                                                                                                                                                                                                                                                                                                                                                                                                                                                                                                                                                                                                                                                                                                                                                                                                                                                        |
| EPI_ISL_419562                                                                                                                                                                                                                                                                                                                                     | Laboratoire National de Santé, Microbiology, Virology                                                                                          | Laboratoire National de Santé, Microbiology, Epidemiology and Microbial Genomics                                                               | Anke Wienecke-Baldacchino; Ardashes Latsuzbaia; Catherine Ragimbeau; Guillaume Fournier; Jessica Tapp; Joel Mossong; Tamir Abdelrahman; Trung Nguyen Nguyen                                                                                                                                                                                                                                                                                                                                                                                                                                                                                                                                                                                                                                                                                                                                                                                                                                                                                                                                                                                                                                                                                                                                                                                                                                                                                                                                                                                                                                                                                                                                           |
| EPI_ISL_3365845                                                                                                                                                                                                                                                                                                                                    | Laboratoire Professeur Daniel GAHOUMA (LPDG)                                                                                                   | Centre de Recherches Médicales de Lambaréné (CERMEI)                                                                                           | Ayong More; Bertrand Lell; Davy Leger Mouangala; Elyvre Mbongo-Nkama; Emilio Skarwan; Georgelin Nguema Ondo; Guy Stéphane Padzys; Gédéon Prince Manouana; Jean Bernard Lekana-Douki; Joël-Fleury Djoba Siawaya and Ayola Akim Adegnika; Kevine Zang Ella; Ludovic Mewono; Moustapha Nzamba Maloum; Noël Patrick Mbondoukwe; Rodrigue Bikangu; Rodrigue Mints Nguema; Sam O'neilla Oye Bingingo; Samira Zoa Assoumou; Sandrine Zeh Nfor; Srinivas reddy Dadda; Steffen Bornmann; Thirumalaisamy P. Velavan                                                                                                                                                                                                                                                                                                                                                                                                                                                                                                                                                                                                                                                                                                                                                                                                                                                                                                                                                                                                                                                                                                                                                                                             |
| EPI_ISL_1159699                                                                                                                                                                                                                                                                                                                                    | Laboratoire central de Virologie                                                                                                               | Laboratoire de Biotechnologie                                                                                                                  | Abdelomounin Essabbar; Amal Zouaki; Ghizlane El Amin; Hakima Kabbaj; Lahcen Belyamani and Azzedine Ibrahim; Mouna Ouadghiri; Myriam Souffar; Saïd Amzazi; Tarik Aanniz                                                                                                                                                                                                                                                                                                                                                                                                                                                                                                                                                                                                                                                                                                                                                                                                                                                                                                                                                                                                                                                                                                                                                                                                                                                                                                                                                                                                                                                                                                                                |
| EPI_ISL_2820514                                                                                                                                                                                                                                                                                                                                    | Laboratoire de Diagnostic, Centre de Soins 1, Caisse Nationale de Sécurité Sociale (CNSS) de Djibouti                                          | IHU Méditerranée Infection                                                                                                                     | Anthony Levasseur; Christian A. Devaux.; Didier Raoult; Idil Salah abdillahi; Ikram Omar Osman; Imran Abdillahi Hassan; Jeremy Delerce; Linda Houhamdi; Ludvine Brechard; Mohamed Hamed Aboubaker; Philippe Colson; Pierre-Edouard Fournier; Zeinab Ali Waberi                                                                                                                                                                                                                                                                                                                                                                                                                                                                                                                                                                                                                                                                                                                                                                                                                                                                                                                                                                                                                                                                                                                                                                                                                                                                                                                                                                                                                                        |
| EPI_ISL_660446, EPI_ISL_660448, EPI_ISL_660487, EPI_ISL_660492, EPI_ISL_660497, EPI_ISL_660519, EPI_ISL_2142738                                                                                                                                                                                                                                    | see above                                                                                                                                      | Centre Muraz                                                                                                                                   | Abdoul-Salam Ouedraogo; Amariane Koné; Armel Poda; Arsène Zongo; Essia Belarbi; Fabian Leendertz; Grit Schubert; Halidou Tinto; Lassana Sangaré; Soumeiya Ouangraoua; Thérèse Kagoné; Yacouba Sawadogo; Zekiba Tarnagda                                                                                                                                                                                                                                                                                                                                                                                                                                                                                                                                                                                                                                                                                                                                                                                                                                                                                                                                                                                                                                                                                                                                                                                                                                                                                                                                                                                                                                                                               |
| EPI_ISL_2289129                                                                                                                                                                                                                                                                                                                                    | Laboratoire de Microbiologie CHU Sourou Sanou                                                                                                  | Laboratoire bacteriologie virologie CHUSS                                                                                                      | Abdoul-Salam Ouedraogo; Abdoulie Kanthe; Abdoul Sesay; Annette Erhart; Armel Poda; François Kiéméd; Halidou Tinto; Mariama Kujabi; Yacouba Sawadogo                                                                                                                                                                                                                                                                                                                                                                                                                                                                                                                                                                                                                                                                                                                                                                                                                                                                                                                                                                                                                                                                                                                                                                                                                                                                                                                                                                                                                                                                                                                                                   |
| EPI_ISL_933715                                                                                                                                                                                                                                                                                                                                     | Laboratoire de Recherche et d'Analyses Médicales de la Gendarmerie Royale                                                                      | Laboratoire de Recherche et d'Analyses Médicales de la Gendarmerie Royale                                                                      | Amal Souiri; Mohammed Labioui; Nabil Lemzaoui; Sanaa Lemrissi; Saâd El kabbaj; elmoustafa El Fahime                                                                                                                                                                                                                                                                                                                                                                                                                                                                                                                                                                                                                                                                                                                                                                                                                                                                                                                                                                                                                                                                                                                                                                                                                                                                                                                                                                                                                                                                                                                                                                                                   |
| EPI_ISL_3239896, EPI_ISL_3253426                                                                                                                                                                                                                                                                                                                   | Laboratoire de Recherche et d'Analyses Médicales de la Gendarmerie Royale                                                                      | Laboratoire de Recherche et d'Analyses Médicales de la Gendarmerie Royale                                                                      | Amal SOURI; Hajar LEMRISS; Sanaa LEMRISS; Saâd EL KABBAJ                                                                                                                                                                                                                                                                                                                                                                                                                                                                                                                                                                                                                                                                                                                                                                                                                                                                                                                                                                                                                                                                                                                                                                                                                                                                                                                                                                                                                                                                                                                                                                                                                                              |
| EPI_ISL_1790074                                                                                                                                                                                                                                                                                                                                    | Laboratoire de Référence de la TB Douala                                                                                                       | Institut Pasteur de Dakar                                                                                                                      | Carniel Elisabeth; Dia Ndong; Diagne Moussa Moïse; Diallo Amadou; Diop Mamadou; Faye Ousmane; Loucoubar Cheikh; Ndlaye Ndaic; Njoum Richard; Sall Amadou Alpha; Sanhe Safietou                                                                                                                                                                                                                                                                                                                                                                                                                                                                                                                                                                                                                                                                                                                                                                                                                                                                                                                                                                                                                                                                                                                                                                                                                                                                                                                                                                                                                                                                                                                        |
| EPI_ISL_1379134, EPI_ISL_2293924, EPI_ISL_2388533, EPI_ISL_2458701, EPI_ISL_3458873, EPI_ISL_3459077                                                                                                                                                                                                                                               | see above                                                                                                                                      | Laboratoire de santé publique du Québec                                                                                                        | Guillaume Bourque; Ioannis Ragoussis; Jesse Shapiro; Mark Lathrop and Michel Roger on behalf of the CoVSeQ research group; Mark Lathrop and Michel Roger on behalf of the CoVSeQ research group (http://covseq.ca/researchgroup); Sandrine Moreira                                                                                                                                                                                                                                                                                                                                                                                                                                                                                                                                                                                                                                                                                                                                                                                                                                                                                                                                                                                                                                                                                                                                                                                                                                                                                                                                                                                                                                                    |
| EPI_ISL_476830                                                                                                                                                                                                                                                                                                                                     | Laboratoire des Fièvres Hémorragiques Virales du Bénin                                                                                         | Charité-Universitätsmedizin Berlin                                                                                                             | Anges; Drexler; Jan Felix; Moreira-Soto Andres; Sander Anna-Lena; Yadouleton                                                                                                                                                                                                                                                                                                                                                                                                                                                                                                                                                                                                                                                                                                                                                                                                                                                                                                                                                                                                                                                                                                                                                                                                                                                                                                                                                                                                                                                                                                                                                                                                                          |
| EPI_ISL_2932536, EPI_ISL_2932541, EPI_ISL_2932544, EPI_ISL_2932555                                                                                                                                                                                                                                                                                 | Laboratoire des Fièvres Hémorragiques Virales du Bénin                                                                                         | Institut für Virologie - Institute of Virology - Charite                                                                                       | Andres Moreira-Soto; Anges Yadouleton; Anna-Lena Sander; Benjamin Hounkpatin and Jan Felix Drexler; Carine Tchiboze; Christian Drosten; Dossou Ange; Eclou Sedjro; Edmilson F de Oliveira Filho; Gildas Hounkanrin; Hinson Fidelia; Keke K. René; Mamoudou Harouna Djingarey; Melchior A. Joël Aissi; Michael Nagel; Olfert Landt; Praise Adewumi; Salifou Sourakatou; Victor Max Corman; Wendy Karen Jo; Yvette Badou                                                                                                                                                                                                                                                                                                                                                                                                                                                                                                                                                                                                                                                                                                                                                                                                                                                                                                                                                                                                                                                                                                                                                                                                                                                                                |
| EPI_ISL_3334656, EPI_ISL_3334657                                                                                                                                                                                                                                                                                                                   | Laboratoire national de sante, 1 rue Louis Rech, L-3555 Dudelange, Luxembourg                                                                  | Laboratoire national de sante, Microbiology, Microbial Genomics Platform                                                                       | Anke Wienecke-Baldacchino; Catherine Ragimbeau; Elodie Solarino; Fatu Djabi; Jessica Tapp; Lise Pignon; Raoul Salmon; Tamir Abdelrahman; Trung Nguyen Nguyen; Virginie Jover                                                                                                                                                                                                                                                                                                                                                                                                                                                                                                                                                                                                                                                                                                                                                                                                                                                                                                                                                                                                                                                                                                                                                                                                                                                                                                                                                                                                                                                                                                                          |
| EPI_ISL_2401040                                                                                                                                                                                                                                                                                                                                    | Laboratoire national de sante, Microbiology, Virology                                                                                          | Laboratoire national de sante, Microbiology, Microbial Genomics Platform                                                                       | Anke Wienecke-Baldacchino; Catherine Ragimbeau; Fatu Djabi; Jessica Tapp; Lise Pignon; Raoul Salmon; Tamir Abdelrahman; Trung Nguyen Nguyen                                                                                                                                                                                                                                                                                                                                                                                                                                                                                                                                                                                                                                                                                                                                                                                                                                                                                                                                                                                                                                                                                                                                                                                                                                                                                                                                                                                                                                                                                                                                                           |
| EPI_ISL_739866, EPI_ISL_744724                                                                                                                                                                                                                                                                                                                     | Laboratoire national de santé, Microbiology, Virology                                                                                          | Laboratoire national de santé, Microbiology, Microbial Genomics Platform                                                                       | Anke Wienecke-Baldacchino; Catherine Ragimbeau; Fatu Djabi; Jessica Tapp; Lise Pignon; Raoul Salmon; Tamir Abdelrahman                                                                                                                                                                                                                                                                                                                                                                                                                                                                                                                                                                                                                                                                                                                                                                                                                                                                                                                                                                                                                                                                                                                                                                                                                                                                                                                                                                                                                                                                                                                                                                                |
| EPI_ISL_2400871, EPI_ISL_2400920, EPI_ISL_3147199, EPI_ISL_3147660                                                                                                                                                                                                                                                                                 | Laboratoires Reunis                                                                                                                            | Laboratoire national de sante, Microbiology, Microbial Genomics Platform                                                                       | Anke Wienecke-Baldacchino; Bernard Weber; Catherine Ragimbeau; Elodie Solarino; Fatu Djabi; Jessica Tapp; Lise Pignon; Raoul Salmon; Tamir Abdelrahman; Virginie Jover                                                                                                                                                                                                                                                                                                                                                                                                                                                                                                                                                                                                                                                                                                                                                                                                                                                                                                                                                                                                                                                                                                                                                                                                                                                                                                                                                                                                                                                                                                                                |
| EPI_ISL_3334797, EPI_ISL_3334817, EPI_ISL_3334841                                                                                                                                                                                                                                                                                                  | Laboratoires Reunis, 38 Rue Hiel, 6131 Junglinster, Luxembourg                                                                                 | Laboratoire national de sante, Microbiology, Microbial Genomics Platform                                                                       | Anke Wienecke-Baldacchino; Bernard Weber; Catherine Ragimbeau; Elodie Solarino; Fatu Djabi; Jessica Tapp; Lise Pignon; Raoul Salmon; Tamir Abdelrahman; Virginie Jover                                                                                                                                                                                                                                                                                                                                                                                                                                                                                                                                                                                                                                                                                                                                                                                                                                                                                                                                                                                                                                                                                                                                                                                                                                                                                                                                                                                                                                                                                                                                |
| EPI_ISL_2400690, EPI_ISL_3148041, EPI_ISL_3148163                                                                                                                                                                                                                                                                                                  | Laboratoires d'analyses medicales - Ketterthill                                                                                                | Laboratoire national de sante, Microbiology, Microbial Genomics Platform                                                                       | Anke Wienecke-Baldacchino; Caroline Scheibel; Catherine Ragimbeau; Elodie Solarino; Fatu Djabi; Jessica Tapp; Lise Pignon; Raoul Salmon; Serge Vedy; Tamir Abdelrahman; Virginie Jover                                                                                                                                                                                                                                                                                                                                                                                                                                                                                                                                                                                                                                                                                                                                                                                                                                                                                                                                                                                                                                                                                                                                                                                                                                                                                                                                                                                                                                                                                                                |
| EPI_ISL_3432487                                                                                                                                                                                                                                                                                                                                    | Laboratori d'anàlisis clíniques, Hospital Nostra Senyora de Meritxell                                                                          | LABORATORI NACIONAL EPIDEMIOLOGIA                                                                                                              | C; Lobaco et Al                                                                                                                                                                                                                                                                                                                                                                                                                                                                                                                                                                                                                                                                                                                                                                                                                                                                                                                                                                                                                                                                                                                                                                                                                                                                                                                                                                                                                                                                                                                                                                                                                                                                                       |
| EPI_ISL_3384885, EPI_ISL_3384887, EPI_ISL_3384893                                                                                                                                                                                                                                                                                                  | Laboratori d'anàlisis clíniques, Hospital Nostra Senyora de Meritxell                                                                          | LBM de CHU de Toulouse, Hôpitaux de Toulouse                                                                                                   | M; Rendon et Al                                                                                                                                                                                                                                                                                                                                                                                                                                                                                                                                                                                                                                                                                                                                                                                                                                                                                                                                                                                                                                                                                                                                                                                                                                                                                                                                                                                                                                                                                                                                                                                                                                                                                       |
| EPI_ISL_2645901                                                                                                                                                                                                                                                                                                                                    | Laboratorio Central de Saude Publica do Estado do Para (LACEN/PA)                                                                              | Laboratory of Respiratory Viruses and Measles, Oswaldo Cruz Institute, FIOCRUZ                                                                 | Alice Sampaio Rocha; Ana Carolina Mendonça; Anna Carolina Paixao; Elisa Cavalcante Pereira; Fernando Motta; Luciana Appolinario; Marilda Siqueira on behalf of the Fiocruz COVID-19 Genomic Surveillance Network; Paola Resende; Renata Serrano Lopes; Taina Venas; Valnete Andrade                                                                                                                                                                                                                                                                                                                                                                                                                                                                                                                                                                                                                                                                                                                                                                                                                                                                                                                                                                                                                                                                                                                                                                                                                                                                                                                                                                                                                   |
| EPI_ISL_964895                                                                                                                                                                                                                                                                                                                                     | Laboratorio Central Mg. Luis Alfredo Pianiola on behalf of 'Proyecto Argentino Interinstitucional de genómica de SARS-CoV-2' (PAIS Consortium) | Laboratorio Central Mg. Luis Alfredo Pianiola on behalf of 'Proyecto Argentino Interinstitucional de genómica de SARS-CoV-2' (PAIS Consortium) | C Pintos; C Ziehm; J Ousset; L Pianiola.; M Fernandez; M Mazzeo; M Nabaes                                                                                                                                                                                                                                                                                                                                                                                                                                                                                                                                                                                                                                                                                                                                                                                                                                                                                                                                                                                                                                                                                                                                                                                                                                                                                                                                                                                                                                                                                                                                                                                                                             |
| EPI_ISL_2385445, EPI_ISL_2837027                                                                                                                                                                                                                                                                                                                   | Laboratorio Central Noel Nutels                                                                                                                | Bioinformatics Laboratory / LNCC                                                                                                               | Alessandra P Lamarca; Alexandra L Gerber; Amílcar Tanuri; Ana Paula de C Guimarães; Ana Tereza R Vasconcelos; Andrea Cony Cavalcanti; Caio Luiz Pereira Ribeiro; Cassia Alves; Cintia Policarpo; Claudia Maria Braga de Mello; Cristiane Gomes da Silva; Diana Mariani; Douglas Terra Machado; Flavio Dias da Silva; Gleidson da Silva de Oliveira; Leandro Magalhães de Souza; Liliane Cavalcante; Luiz G P de Almeida; Marcio Henrique de Oliveira Garcia; Mario Sergio Ribeiro; Ronaldo da Silva F Jr; Silva Carvalho                                                                                                                                                                                                                                                                                                                                                                                                                                                                                                                                                                                                                                                                                                                                                                                                                                                                                                                                                                                                                                                                                                                                                                              |
| EPI_ISL_1662201, EPI_ISL_3568775, EPI_ISL_3568811                                                                                                                                                                                                                                                                                                  | Laboratorio Central de Epidemiologia (LCE)                                                                                                     | Unidad de Genómica Avanzada                                                                                                                    | ; Alejandra García-Gasca; Alejandra Hernández-Teran; Alejandro Sanchez-Flores; Alfredo Herrera-Estrella; Alicia Ocaña-Mondragón; Andreu Comas-García; Angel Gustavo Salas-Lais; Antonio Loza Roman; Bernardo Martínez-Miguel; Blanca Taboada; Brenda Irasema Maldonado-Meza; Bruno Gomez-Gil; Carla Ivon Herrera-Najera; Carlos F. Arias; Celia Boukadida; Celida Duque Molina; Celida Martinez- Rodriguez; Clara Esperanza Santacruz-Tinoco; Concepcion Grajales-Muñiz; Concepcion Grajales-Muñiz; Consorcio Mexicano de Vigilancia Genómica (CoViGen-Mex). Authors (in alphabetical order): Julio Elias Alvarado-Yaah; Cristóbal Cháidez-Quiroz; Daniel Lira Morales; Eduardo Becerril-Vargas; Fernando Fontove-Herrera; Fidencio Mejía-Nepomuceno; Francisco Pulido; Gloria Elena Espinosa-Ayala; Gloria Maria Molina-Salinas; Gloria Vazquez; Hector Esteban Paz-Juarez; Hector Montoya-Fuentes; Helen Haydee Fernanda Ramirez-Plascencia; Irvin Gonzalez-Lopez; Jean Pierre Gonzalez; Jesus Hernandez; Joel Armando Vazquez-Perez; Jorge Salas-Hernandez; Jose Antonio Enciso-Moreno; Jose Arturo Munoz-Orozco; Jose Esteban Munoz-Medina; Jose Esteban Muñoz-Medina; Jose de Jesus Nuñez-Contreras; Jose de Jesus Nuñez-Contreras; Juan Bautista Chale-Dzul; Julissa Enciso-Ibarra; Luis Alberto Ochoa-Carrera; Margarita Matias-Florentino; Maria Guadalupe Santiago-Mauricio; Maria Guadalupe de Jesus Mireles-Rivera; Mario Mujica-Sanchez; Marissa Perez-Garcia; Nelly Selem-Mojica; Pavel Isa; Ricardo Ciria Merce; Ricardo Grande; Rosa Maria Gutierrez Rios; Santiago Avila-Rios; Selene Zarate; Susana Lopez; Veronica Mata-Haro; Victor Eduardo Garcia-Arias; Victor Hugo Borja-Aburto |
| EPI_ISL_2671638, EPI_ISL_2671736, EPI_ISL_3805485, EPI_ISL_3805507, EPI_ISL_3805519, EPI_ISL_3805521, EPI_ISL_3805527, EPI_ISL_3805538, EPI_ISL_3805571, EPI_ISL_3805641, EPI_ISL_3805689, EPI_ISL_3805698, EPI_ISL_3805732                                                                                                                        | see above                                                                                                                                      | Unidad de Genómica Avanzada                                                                                                                    | ; Alejandra García-Gasca; Alejandra Hernández-Teran; Alejandro Sanchez-Flores; Alfredo Herrera-Estrella; Alicia Ocaña-Mondragón; Andreu Comas-García; Angel Gustavo Salas-Lais; Antonio Loza Roman; Bernardo Martínez-Miguel; Blanca Taboada; Brenda Irasema Maldonado-Meza; Bruno Gomez-Gil; Carla Ivon Herrera-Najera; Carlos F. Arias; Celia Boukadida; Celida Duque Molina; Celida Martinez- Rodriguez; Clara Esperanza Santacruz-Tinoco; Concepcion Grajales-Muñiz; Consorcio Mexicano de Vigilancia Genómica (CoViGen-Mex). Authors (in alphabetical order): Julio Elias Alvarado-Yaah; Cristóbal Cháidez-Quiroz; Daniel Lira Morales; Eduardo Becerril-Vargas; Fernando Fontove-Herrera; Fidencio Mejía-Nepomuceno; Francisco Pulido; Gloria Elena Espinosa-Ayala; Gloria Maria Molina-Salinas; Gloria Vazquez; Hector Esteban Paz-Juarez; Hector Montoya-Fuentes; Helen Haydee Fernanda Ramirez-Plascencia; Irvin Gonzalez-Lopez; Jean Pierre Gonzalez; Jesus Hernandez; Joel Armando Vazquez-Perez; Jorge Salas-Hernandez; Jose Antonio Enciso-Moreno; Jose Arturo Munoz-Orozco; Jose Esteban Muñoz-Medina; Jose de Jesus Nuñez-Contreras; Jose de Jesus Nuñez-Contreras; Juan Bautista Chale-Dzul; Julissa Enciso-Ibarra; Luis Alberto Ochoa-Carrera; Margarita Matias-Florentino; Maria Guadalupe Santiago-Mauricio; Maria Guadalupe de Jesus Mireles-Rivera; Mario Mujica-Sanchez; Marissa Perez-Garcia; Nelly Selem-Mojica; Pavel Isa; Ricardo Ciria Merce; Ricardo Grande; Rosa Maria Gutierrez Rios; Santiago Avila-Rios; Selene Zarate; Susana Lopez; Victor Eduardo Garcia-Arias; Victor Hugo Borja-Aburto                                                                           |
| EPI_ISL_1351878                                                                                                                                                                                                                                                                                                                                    | Laboratorio Central de EpidemiologÃa (LCE)                                                                                                     | Unidad de Genómica Avanzada                                                                                                                    | Alejandro Sanchez-Flores; Alfredo Herrera-Estrella; Alicia Ocaña-Mondragón; Angel Gustavo Salas-Lais; Bernardo Martínez-Miguel; Blanca Taboada; Brenda Irasema Maldonado-Meza; Carla Ivon Herrera-Najera; Carlos F. Arias; Celia Boukadida; Clara Esperanza Santacruz-Tinoco; Concepcion Grajales-Muñiz; Consorcio Mexicano de Vigilancia Genómica (CoViGen-Mex). Authors (in alphabetical order): Julio Elias Alvarado-Yaah; Cristóbal Cháidez-Quiroz; Daniel Lira Morales; Eduardo Becerril-Vargas; Fernando Fontove-Herrera; Fidencio Mejía-Nepomuceno; Francisco Pulido; Gloria Elena Espinosa-Ayala; Gloria Maria Molina-Salinas; Gloria Vazquez; Hector Esteban Paz-Juarez; Hector Montoya-Fuentes; Helen Haydee Fernanda Ramirez-Plascencia; Jorge Ivan Salinal-Navarez; Jose Antonio Enciso-Moreno; Jose Esteban Muñoz-Medina; Jose de Jesus Nuñez-Contreras; Juan Bautista Chale-Dzul; Luis Alberto Ochoa-Carrera; Margarita Matias-Florentino; Maria Guadalupe Santiago-Mauricio; Maria Guadalupe de Jesus Mireles-Rivera; Mario Mujica-Sanchez; Marissa Perez-Garcia; Nelly Selem-Mojica; Pavel Isa; Ricardo Ciria Merce; Ricardo Grande; Rosa Maria Gutierrez Rios; Santiago Avila-Rios; Selene Zarate; Susana Lopez; Victor Eduardo Garcia-Arias; Victor Hugo Borja-Aburto                                                                                                                                                                                                                                                                                                                                                                                                               |
| EPI_ISL_2490557                                                                                                                                                                                                                                                                                                                                    | Laboratorio Central de Epidemiología (LCE)                                                                                                     | Centro de Investigación en Enfermedades Infecciosas (CIENI), Instituto Nacional de Enfermedades Respiratorias (INER)                           | ; Alejandra García-Gasca; Alejandra Hernández-Terán; Alejandro Sanchez-Flores; Alfredo Herrera-Estrella; Alicia Ocaña-Mondragón; Andreu Comas-García; Angel Gustavo Salas-Lais; Antonio Loza Román; Bernardo Martínez-Miguel; Blanca Taboada; Brenda Irasema Maldonado-Meza; Bruno Gomez-Gil; Carla Ivon Herrera-Najera; Carlos F. Arias; Celia Boukadida; Clara Esperanza Santacruz-Tinoco; Concepción Grajales-Muñiz; Consorcio Mexicano de Vigilancia Genómica (CoViGen-Mex). Authors (in alphabetical order): Julio Elias Alvarado-Yaah; Cristóbal Cháidez-Quiroz; Célida Duque Molina; Célida Martínez- Rodríguez; Daniel Fregoso-Rueda; Daniel Lira Morales; Eduardo Becerril-Vargas; Fernando Fontove-Herrera; Fidencio Mejía-Nepomuceno; Francisco Pulido; Gloria Elena Espinosa-Ayala; Gloria Maria Molina-Salinas; Gloria Vazquez; Hector Esteban Paz-Juárez; Hector Montoya-Fuentes; Helen Haydee Fernanda Ramirez-Plascencia; Irvin González-López; Jean Pierre González; Joel Armando Vázquez-Pérez; Jorge Salas-Hernández; José Antonio Enciso-Moreno; José Arturo Martínez-Orozco; José Esteban Muñoz-Medina; José de Jesús Nuñez-Contreras; Juan Bautista Chale-Dzul; Julissa Enciso-Ibarra; Luis Alberto Ochoa-Carrera; Margarita Matias-Florentino; María Guadalupe Santiago-Mauricio; María Guadalupe de Jesús Mireles-Rivera; Nelly Selem-Mojica; Pavel Isa; Ricardo Ciria Merce; Ricardo Grande; Rosa María Gutiérrez Ríos; Santiago Avila-Ríos; Selene Zárate; Susana Lopez; Victor Eduardo Garcia-Arias; Victor Hugo Borja-Aburto                                                                                                                                              |
| EPI_ISL_1279539, EPI_ISL_1585621                                                                                                                                                                                                                                                                                                                   | Laboratorio Central de Epidemiología (LCE)                                                                                                     | Instituto Nacional de Enfermedades Respiratorias (INER): Centro de Investigación en Enfermedades Infecciosas (CIENI)                           | Alejandro Sanchez-Flores; Alfredo Herrera-Estrella; Alicia Ocaña-Mondragón; Angel Gustavo Salas-Lais; Bernardo Martínez-Miguel; Blanca Taboada; Brenda Irasema Maldonado-Meza; Carla Ivon Herrera-Najera; Carlos F. Arias; Celia Boukadida; Clara Esperanza Santacruz-Tinoco; Concepción Grajales-Muñiz; Consorcio Mexicano de Vigilancia Genómica (CoViGen-Mex). Authors (in alphabetical order): Julio Elias Alvarado-Yaah; Fernando Fontove-Herrera; Francisco Pulido; Gloria Elena Espinosa-Ayala; Gloria Maria Molina-Salinas; Gloria Vazquez; Hector Esteban Paz-Juárez; Hector Montoya-Fuentes; Helen Haydee Fernanda Ramirez-Plascencia; Irvin González-López; Jose de Jesus Nuñez-Contreras; Juan Bautista Chale-Dzul; Luis Alberto Ochoa-Carrera; Margarita Matias-Florentino; Maria Guadalupe Santiago-Mauricio; Maria Guadalupe de Jesus Mireles-Rivera; Nelly Selem-Mojica; Pavel Isa; Ricardo Grande; Santiago Avila-Rios; Victor Eduardo Garcia-Arias; Victor Hugo Borja-Aburto                                                                                                                                                                                                                                                                                                                                                                                                                                                                                                                                                                                                                                                                                                        |
| EPI_ISL_1416441, EPI_ISL_1416469, EPI_ISL_1416637, EPI_ISL_1811482, EPI_ISL_2391606, EPI_ISL_2391618, EPI_ISL_2391631, EPI_ISL_2391645, EPI_ISL_2391711, EPI_ISL_2681135, EPI_ISL_2681155, EPI_ISL_2801799, EPI_ISL_2801845, EPI_ISL_2801852, EPI_ISL_3091097, EPI_ISL_3347563, EPI_ISL_3347698, EPI_ISL_3347747, EPI_ISL_3347773, EPI_ISL_3347804 | see above                                                                                                                                      | Instituto de Biotecnología de la UNAM                                                                                                          | ; Alejandra García-Gasca; Alejandra García-Gasca; Alejandra Hernández-Terán; Alejandro Sanchez-Flores; Alejandro Sánchez-Flores; Alfredo Herrera-Estrella; Alicia Ocaña-Mondragón; Andreu Comas-García; Angel Gustavo Salas-Lais; Antonio Loza Román; Bernardo Martínez-Miguel; Blanca Taboada; Brenda Irasema Maldonado-Meza; Bruno Gomez-Gil; Bruno Gomez-Gil; Carla Ivon Herrera-Najera; Carlos F. Arias; Celia Boukadida; Clara Esperanza Santacruz-Tinoco; Concepcion Grajales-Muñiz; Consorcio Mexicano de Vigilancia Genómica (CoViGen-Mex). Authors (in                                                                                                                                                                                                                                                                                                                                                                                                                                                                                                                                                                                                                                                                                                                                                                                                                                                                                                                                                                                                                                                                                                                                       |

|                                                                                                     |                                                                                                                                                                                                                                                                                                                  |                                                                                                                                                                                                     |                                                                                                                                                                                                                                                                                                                                                                                                                                                                                                                                                                                                                                                                                                                                                                                                                                                                                                                                                                                                                                                                                                                                                                                                                                                                                                                                           |
|-----------------------------------------------------------------------------------------------------|------------------------------------------------------------------------------------------------------------------------------------------------------------------------------------------------------------------------------------------------------------------------------------------------------------------|-----------------------------------------------------------------------------------------------------------------------------------------------------------------------------------------------------|-------------------------------------------------------------------------------------------------------------------------------------------------------------------------------------------------------------------------------------------------------------------------------------------------------------------------------------------------------------------------------------------------------------------------------------------------------------------------------------------------------------------------------------------------------------------------------------------------------------------------------------------------------------------------------------------------------------------------------------------------------------------------------------------------------------------------------------------------------------------------------------------------------------------------------------------------------------------------------------------------------------------------------------------------------------------------------------------------------------------------------------------------------------------------------------------------------------------------------------------------------------------------------------------------------------------------------------------|
|                                                                                                     |                                                                                                                                                                                                                                                                                                                  |                                                                                                                                                                                                     | alphabetical order); Julio Elias Alvarado-Yaah; Cristóbal Cháidez-Quiróz; Célida Duque Molina; Célida Duque Molina; Célida Martínez-Rodríguez; Daniel Fregoso-Rueda; Daniel Lira Morales; Eduardo Becerri-Vargas; Fernando Fontove-Herrera; Fidencio Mejía-Nepomuceno; Francisco Pulido; Gloria Elena Espinosa-Ayala; Gloria Elena Espinoza-Ayala; Gloria María Molina-Salinas; Gloria Vazquez; Hector Esteban Paz-Juárez; Hector Montoya-Fuentes; Helen Haydee Fernanda Ramirez-Plascencia; Irvin González-López; Jean Pierre González; Jesús Hernández; Joel Armando Vázquez-Pérez.; Joel Armando Vázquez-Pérez.; Jorge Ivan Salinal-Nevarez; Jorge Salas-Hernández; José Antonio Enciso-Moreno; José Arturo Martínez-Orozco; José Esteban Muñoz-Medina; José de Jesús Nuñez-Contreras; Juan Bautista Chale-Dzul; Julio Elias Alvarado-Yaah; Julissa Enciso-Ibarra; Kathia Elizabeth Tapia-Díaz; Luis Alberto Ochoa-Carrera; Margarita Matías-Florentino; Mario Mújica-Sánchez; Marissa Perez-García; María Guadalupe Santiago-Mauricio; María Guadalupe de Jesús Mireles-Rivera; Nelly Sélem-Mojica; Pavel Isa; Ricardo Ciriá Mercé; Ricardo Grande; Rosa María Gutierrez Rios; Rosa María Gutiérrez Rios; Santiago Ávila-Ríos; Selene Zárate; Susana Lopez; Verónica Mata-Haro; Victor Eduardo García-Arias; Victor Hugo Borja-Aburto |
| EPI_ISL_1301468, EPI_ISL_1301636, EPI_ISL_1301672                                                   | Laboratorio Central de Epidemiologia IMSS                                                                                                                                                                                                                                                                        | Instituto de Biotecnología de la UNAM                                                                                                                                                               | Alejandra Hernández-Terán; Alejandro Sanchez-Flores; Alma Rincón-Rubio; Andrea Santos Coy-Archavealeta; Authors from IBT; Blanca Taboada; Celia Boukadidia; Clara Esperanza Santacruz-Tinoco; Edgar Mendieta-Condado; Eduardo Becerri-Vargas; Fidencio Mejía-Nepomuceno; Francisco Pulido; Gisela Barrera-Badillo; Gloria Vazquez; Hector Esteban Paz-Juárez; IMSS; InDRE and INER (in alphabetical order); Carlos F. Arias; Irma Lopez-Martinez; Jerome Jean Verleyen; Joel Armando Vázquez-Pérez; Jorge Salas-Hernández; José Arturo Martínez-Orozco; José Ernesto Ramírez-González; José Esteban Muñoz-Medina; Larissa Fernandes-Matano; Lucia Hernandez-Rivas; Luis Alberto Ochoa-Carrera; Margarita Matías-Florentino; Mario Mújica-Sánchez; Natividad Cruz-Ortiz; Pavel Isa; Ricardo Grande; Santiago Ávila-Ríos; Tatiana Nunez-García; Teresita Rojas-Mendoza                                                                                                                                                                                                                                                                                                                                                                                                                                                                      |
| EPI_ISL_3825482, EPI_ISL_3825483, EPI_ISL_3825486, EPI_ISL_3825487                                  | Laboratorio Central de Salud Publica                                                                                                                                                                                                                                                                             | Laboratorio de Biología Molecular, Instituto de Medicina Regional on behalf of 'Proyecto Argentino Interinstitucional de genómica de SARS-CoV-2' (PAIS Consortium)                                  | Andrea Ayala; Bettina Brusés; Erica Struss; Esteban Paredes; Griselda Oria; Horacio Lucero.; Javier Mussin; Laura Formichelli; Melina Lorenzini Campos; Raúl Maximiliano Acevedo; Verónica Gómez; Victoria Femenías                                                                                                                                                                                                                                                                                                                                                                                                                                                                                                                                                                                                                                                                                                                                                                                                                                                                                                                                                                                                                                                                                                                       |
| EPI_ISL_3586959, EPI_ISL_3586976, EPI_ISL_3586987                                                   | Laboratorio Central de Salud Publica de Paraguay                                                                                                                                                                                                                                                                 | Fundação Ezequiel Dias                                                                                                                                                                              | Andre Leal; Andrea Gómez de la Fuente; Cynthia Vazquez; Elaine Cristina; Felipe Iani; Flavia Aburjaile; Gislene Garcia de Castro Lichs; Glauco Carvalho; Hegger Fritsch; Joilson Xavier; Juan Torales; Luiz Alcantara.; Luiz Henrique Ferraz Demarchi; Luiz Takao Watanabe; Marina Castilhos Souza Umaki Zardin; Marta Giovanetti; María José Ortega; María Liz Gamarra; Natalia Guimaraes; Raquel da Silva Ferreira; Shirley Vialla; Talita Adelino; Wagner Fonseca; de Oliveira                                                                                                                                                                                                                                                                                                                                                                                                                                                                                                                                                                                                                                                                                                                                                                                                                                                         |
| EPI_ISL_1492648                                                                                     | Laboratorio Central de Salud Publica de Paraguay                                                                                                                                                                                                                                                                 | Laboratorio Central de Salud Publica de Paraguay                                                                                                                                                    | Andrea Gómez de la Fuente; Cynthia Vázquez; Flavia Aburjaile; Juan Torales; Luiz Carlos Junior Alcantara; Marta Giovanetti; María José Ortega; María Liz Gamarra; Shirley Vialla; Talita Adelino; Wagner Fonseca                                                                                                                                                                                                                                                                                                                                                                                                                                                                                                                                                                                                                                                                                                                                                                                                                                                                                                                                                                                                                                                                                                                          |
| EPI_ISL_2940230                                                                                     | Laboratorio Central de Salud Pública de la Provincia de Jujuy                                                                                                                                                                                                                                                    | Instituto de Patología Vegetal (CIAP-INTA) on behalf of 'Proyecto Argentino Interinstitucional de genómica de SARS-CoV-2' (PAIS Consortium)                                                         | Ariel David Fridman; Claudia Mamani; Debat, HJ.; FD; Fabiana Vaca; Fernández; Marquez, N.; Miguel Alejandro Charre                                                                                                                                                                                                                                                                                                                                                                                                                                                                                                                                                                                                                                                                                                                                                                                                                                                                                                                                                                                                                                                                                                                                                                                                                        |
| EPI_ISL_3832480                                                                                     | Laboratorio Central de Saude Publica do Estado da Paraiba (LACEN/PB)                                                                                                                                                                                                                                             | Laboratory of Respiratory Viruses and Measles, Oswaldo Cruz Institute, FIOCRUZ                                                                                                                      | Alice Sampaio Rocha; Ana Carolina Mendonca; Anna Carolina Paixao; Dalane Loudal Florentino Teixeira; Elisa Cavalcante Pereira; Fernando Motta; Joao Felipe Bezerra; Luciana Appolinario; Marilda Siqueira on behalf of the Fiocruz COVID-19 Genomic Surveillance Network; Paola Resende; Renata Serrano Lopes; Taina Venas                                                                                                                                                                                                                                                                                                                                                                                                                                                                                                                                                                                                                                                                                                                                                                                                                                                                                                                                                                                                                |
| EPI_ISL_2466233                                                                                     | Laboratorio Central de Saude Publica do Estado de Alagoas (LACEN/AL)                                                                                                                                                                                                                                             | Laboratory of Respiratory Viruses and Measles, Oswaldo Cruz Institute, FIOCRUZ                                                                                                                      | Alice Sampaio Rocha; Ana Carolina Mendonca; Anderson Brandao Leite; Anna Carolina Paixao; Elisa Cavalcante Pereira; Fernando Motta; Luciana Appolinario; Marilda Siqueira on behalf of the Fiocruz COVID-19 Genomic Surveillance Network; Paola Resende; Renata Serrano Lopes; Taina Venas                                                                                                                                                                                                                                                                                                                                                                                                                                                                                                                                                                                                                                                                                                                                                                                                                                                                                                                                                                                                                                                |
| EPI_ISL_3801904                                                                                     | Laboratorio Central de Saude Publica do Estado de Santa Catarina (LACEN/SC)                                                                                                                                                                                                                                      | Laboratory of Respiratory Viruses and Measles, Oswaldo Cruz Institute, FIOCRUZ                                                                                                                      | Alice Sampaio Rocha; Ana Carolina Mendonca; Anna Carolina Paixao; Darcita Buerger Rovaris; Elisa Cavalcante Pereira; Fernando Motta; Luciana Appolinario; Marilda Siqueira on behalf of the Fiocruz COVID-19 Genomic Surveillance Network; Paola Resende; Renata Serrano Lopes; Sandra Bianchini Fernandes; Taina Venas                                                                                                                                                                                                                                                                                                                                                                                                                                                                                                                                                                                                                                                                                                                                                                                                                                                                                                                                                                                                                   |
| EPI_ISL_3045439                                                                                     | Laboratorio Central de Saude Publica do Estado do Espírito Santo (LACEN/ES)                                                                                                                                                                                                                                      | Laboratory of Respiratory Viruses and Measles, Oswaldo Cruz Institute, FIOCRUZ                                                                                                                      | Alice Sampaio Rocha; Ana Carolina Mendonca; Anna Carolina Paixao; Elisa Cavalcante Pereira; Fernando Motta; Luciana Appolinario; Marilda Siqueira on behalf of the Fiocruz COVID-19 Genomic Surveillance Network; Paola Resende; Renata Serrano Lopes; Rodrigo Ribeiro Rodrigues; Taina Venas                                                                                                                                                                                                                                                                                                                                                                                                                                                                                                                                                                                                                                                                                                                                                                                                                                                                                                                                                                                                                                             |
| EPI_ISL_2775494                                                                                     | Laboratorio Central de Saude Publica do Estado do Parana (Instituto de Biologia Molecular do Paraná (LACIEN-PR)                                                                                                                                                                                                  | Instituto Carlos Chagas - Fiocruz                                                                                                                                                                   | Alessandra De Melo Aguiar; Andreia Akemi Suzukawa; Andréa Rodrigues Ávila; Bruno Dallagiovanna; Dalia Zanette; Eduardo Balsanelli; Emanuel Maltempi de Souza; Fabio Passetti; Fabricio Kleriynton Marchini; Fábio de Oliveira Pedrosa; Guilherme Becker; Helisson Faoro; Helen Geremias dos Santos; Irina Nastassja Riediger; Letusa Albrecht; Lucas Blanes; Luis Gustavo Morello; Lysangela Ronalte Alves; Maria do Carmo Debur; Mauro de Medeiros Oliveira; Michelle Orane Schemberger; Paola Cristina Resende; Sheila Cristina Nardeli; Tiago Graf; Valter Antônio de Baur                                                                                                                                                                                                                                                                                                                                                                                                                                                                                                                                                                                                                                                                                                                                                             |
| EPI_ISL_3832366                                                                                     | Laboratorio Central de Saude Publica do Estado do Parana (LACEN/PR)                                                                                                                                                                                                                                              | Laboratory of Respiratory Viruses and Measles, Oswaldo Cruz Institute, FIOCRUZ                                                                                                                      | Agatha Soares; Alice Sampaio Rocha; Ana Carolina Mendonca; Anna Carolina Paixao; Elisa Cavalcante Pereira; Fernando Motta; Igor Leonardo Arantes; Irina Riediger; Luciana Appolinario; Marilda Siqueira on behalf of the Fiocruz COVID-19 Genomic Surveillance Network; Paola Resende; Renata Serrano Lopes; Taina Venas                                                                                                                                                                                                                                                                                                                                                                                                                                                                                                                                                                                                                                                                                                                                                                                                                                                                                                                                                                                                                  |
| EPI_ISL_3832401                                                                                     | Laboratorio Central de Saude Publica do Estado do Rio Grande do Norte (LACEN/RN)                                                                                                                                                                                                                                 | Laboratory of Respiratory Viruses and Measles, Oswaldo Cruz Institute, FIOCRUZ                                                                                                                      | Agatha Soares; Alice Sampaio Rocha; Ana Carolina Mendonca; Ana Paula Ferreira Costa; Anna Carolina Paixao; Antonnyo Palmielly Diogenes Lima; Aurélio de Oliveira Bento; Elisa Cavalcante Pereira; Fernando Motta; Gessika Brenna Costa Alves; Heglayne Pereira Vital da Silva; Iago de Souza Gomes; Ighor Arantes; Isabelle Cristina Clemente dos Santos; Janaina Sonale Cavalcante Nogueira de Oliveira; Jayra Juliana Paiva Alves Abrantes; Jonas José da Silva; Luciana Appolinario; Marilda Siqueira on behalf of the Fiocruz COVID-19 Genomic Surveillance Network; Paola Resende; Renata Serrano Lopes; Taina Venas; Themis Rocha de Souza; Vitor Gabriel Saldanha Fernandes                                                                                                                                                                                                                                                                                                                                                                                                                                                                                                                                                                                                                                                        |
| EPI_ISL_3539870                                                                                     | Laboratorio Central de Saude Publica do Estado do Rio Grande do Sul (LACEN-RS)                                                                                                                                                                                                                                   | Laboratory of Respiratory Viruses and Measles, Oswaldo Cruz Institute, FIOCRUZ                                                                                                                      | Alice Sampaio Rocha; Ana Carolina Mendonca; Anna Carolina Paixao; Elisa Cavalcante Pereira; Fernando Motta; Luciana Appolinario; Marilda Siqueira on behalf of the Fiocruz COVID-19 Genomic Surveillance Network; Paola Resende; Renata Serrano Lopes; Richard Salvato; Taina Venas; Tatiana Schaffer Gregianni                                                                                                                                                                                                                                                                                                                                                                                                                                                                                                                                                                                                                                                                                                                                                                                                                                                                                                                                                                                                                           |
| EPI_ISL_3033044, see above                                                                          | EPI_ISL_3033045, EPI_ISL_3033061, EPI_ISL_3033063, EPI_ISL_3033064, EPI_ISL_3033066, EPI_ISL_3033076, EPI_ISL_3260098, EPI_ISL_3260103, EPI_ISL_3260104                                                                                                                                                          | Grupo de Genómica y Bioinformática del Instituto de Investigación de la Cadena Láctea CONICET-INTA on behalf of 'Proyecto Argentino Interinstitucional de genómica de SARS-CoV-2' (PAIS Consortium) | AF; Amadio; C; Eberhardt; G; Irazoque; JM; MF; Mugna; Ojeda; Pastor; Rompato; V                                                                                                                                                                                                                                                                                                                                                                                                                                                                                                                                                                                                                                                                                                                                                                                                                                                                                                                                                                                                                                                                                                                                                                                                                                                           |
| EPI_ISL_2271693, EPI_ISL_2271695                                                                    | Laboratorio Central, Ministerio de Salud Cordoba                                                                                                                                                                                                                                                                 | Instituto de Patología Vegetal (CIAP-INTA) on behalf of 'Proyecto Argentino Interinstitucional de genómica de SARS-CoV-2' (PAIS Consortium)                                                         | Barbas, G.; Castro, G.; Debat, HJ.; FD; Fernandez; M; M.B.; Marquez, N.; Pisano; Re, V.                                                                                                                                                                                                                                                                                                                                                                                                                                                                                                                                                                                                                                                                                                                                                                                                                                                                                                                                                                                                                                                                                                                                                                                                                                                   |
| EPI_ISL_792527, EPI_ISL_3230016, EPI_ISL_3230018, EPI_ISL_3860389, EPI_ISL_3860391, EPI_ISL_3860395 | Laboratorio Central, Ministerio de Salud Córdoba                                                                                                                                                                                                                                                                 | Instituto de Patología Vegetal (CIAP-INTA) on behalf of 'Proyecto Argentino Interinstitucional de genómica de SARS-CoV-2' (PAIS Consortium)                                                         | Barbas, G.; Castro, G.; Debat, HJ.; FD; Fernández; M; M.B.; MB; Marquez, N.; Pisano; Re; Re, V.; V                                                                                                                                                                                                                                                                                                                                                                                                                                                                                                                                                                                                                                                                                                                                                                                                                                                                                                                                                                                                                                                                                                                                                                                                                                        |
| EPI_ISL_2102626                                                                                     | Laboratorio Estatal de Salud Publica de Nuevo Leon                                                                                                                                                                                                                                                               | Laboratorio Estatal de Salud Publica de Nuevo Leon                                                                                                                                                  | (in alphabetical order) Consuelo Treviño-Garza; Eduardo Isaac de la Rosa-Moreno; Else del Carmen Garcia-García; Gloria Alejandra Jasso-de la Peña; Manuel Enrique de la O-Cavazos; Olín Medina-Chávez; Yulianna Mayre Cordero-Cruz                                                                                                                                                                                                                                                                                                                                                                                                                                                                                                                                                                                                                                                                                                                                                                                                                                                                                                                                                                                                                                                                                                        |
| EPI_ISL_3527791, see above                                                                          | EPI_ISL_3527799, EPI_ISL_3527801, EPI_ISL_3527803, EPI_ISL_3527812, EPI_ISL_3527816, EPI_ISL_3527818, EPI_ISL_3527827, EPI_ISL_3801286, EPI_ISL_3801289, EPI_ISL_3835365, EPI_ISL_3835373, EPI_ISL_3835378, EPI_ISL_3835385, EPI_ISL_3835387, EPI_ISL_3835388, EPI_ISL_3835392, EPI_ISL_3835397, EPI_ISL_3835415 | Asociación de Salud Integral / Clínica Familiar "Luis Angel García"                                                                                                                                 | Ana S. Gonzalez-Reiche; Claudia Range; Danicela Mercado; Eduardo Arathon; Hilda Ruiz; Luis Aguirre; Luis Rivas; Narda Medina; Oscar Bonilla; Osmar Gamboa.                                                                                                                                                                                                                                                                                                                                                                                                                                                                                                                                                                                                                                                                                                                                                                                                                                                                                                                                                                                                                                                                                                                                                                                |
| EPI_ISL_2825113, EPI_ISL_2827791, EPI_ISL_2827830                                                   | Laboratorio Nacional de Salud                                                                                                                                                                                                                                                                                    | Laboratorio Nacional de Salud                                                                                                                                                                       | Gabriela García; Linda Mendoza                                                                                                                                                                                                                                                                                                                                                                                                                                                                                                                                                                                                                                                                                                                                                                                                                                                                                                                                                                                                                                                                                                                                                                                                                                                                                                            |
| EPI_ISL_837595                                                                                      | Laboratorio Nacional de Salud                                                                                                                                                                                                                                                                                    | Laboratory of Respiratory Viruses and Measles, Oswaldo Cruz Institute, FIOCRUZ                                                                                                                      | Ana Carolina Mendonca; Anna Carolina Paixao; Cesar Roberto Conde Pereira; Claudia Estrada; Fernando Motta; Luciana Appolinario; Marilda Siqueira on behalf of the Fiocruz COVID-19 Genomic Surveillance Network; Paola Resende                                                                                                                                                                                                                                                                                                                                                                                                                                                                                                                                                                                                                                                                                                                                                                                                                                                                                                                                                                                                                                                                                                            |
| EPI_ISL_3045395                                                                                     | Laboratorio Nacional de Salud Pública Dr. Defilló - LNSPDD                                                                                                                                                                                                                                                       | Laboratory of Respiratory Viruses and Measles, Oswaldo Cruz Institute, FIOCRUZ                                                                                                                      | Alice Sampaio Rocha; Ana Carolina Mendonca; Anna Carolina Paixao; Elisa Cavalcante Pereira; Fernando Motta; Grey Benoit Vasquez; Isaac Miguel Sanchez; Ivonne Imbert; Lucia de la Cruz; Luciana Appolinario; Marilda Siqueira on behalf of the Fiocruz COVID-19 Genomic Surveillance Network; Nurys de Castro; Paola Resende; Renata Serrano Lopes; Ronald Skewes; Taina Venas                                                                                                                                                                                                                                                                                                                                                                                                                                                                                                                                                                                                                                                                                                                                                                                                                                                                                                                                                            |
| EPI_ISL_3275191, EPI_ISL_3275231                                                                    | Laboratorio Nacional de Salud, Ministerio de Salud Publica y Asistencia Social                                                                                                                                                                                                                                   | Genomics and Proteomics Department, Gorgas Memorial Institute For Health Studies                                                                                                                    | Alexander A Martinez; Ambar Moreno; Claudia Estrada; Claudia Gonzalez V; César Roberto Conde Pereira; Jessica Gondola; Leyda Abrego; Marlene Castillo; Oris Chavarria                                                                                                                                                                                                                                                                                                                                                                                                                                                                                                                                                                                                                                                                                                                                                                                                                                                                                                                                                                                                                                                                                                                                                                     |
| EPI_ISL_2650526, EPI_ISL_2650528, EPI_ISL_2650534                                                   | Laboratorio Nacional de Vigilancia de la Salud - Sección de Virologia                                                                                                                                                                                                                                            | Genomics and Proteomics Department, Gorgas Memorial Institute For Health Studies                                                                                                                    | Alexander Martinez; Ambar Moreno; Claudia Díaz; Claudia Gonzalez; Jessica Gondola; Leyda Abrego; Marlene Castillo; Mitzi Castro; Oris Chavarria; Sandra Paola Paz; Sofia Carolina Alvarado                                                                                                                                                                                                                                                                                                                                                                                                                                                                                                                                                                                                                                                                                                                                                                                                                                                                                                                                                                                                                                                                                                                                                |
| EPI_ISL_3320740                                                                                     | Laboratorio Previs IPS                                                                                                                                                                                                                                                                                           | Instituto Nacional de Salud                                                                                                                                                                         | Carlos Franco-Muñoz; Carmen Osorio; Diana Malo; Diego A. Álvarez-Díaz; Diego Andrés Prada; Gerardo Santamaría; Hector Alejandro Ruiz-Moreno; Jhonntan Reales-González; Jorge Rivera; Juan Camilo Martínez; Julian Naizaque; Katherine Laiton-Donato; Lisseth Pardo; Magdalena Wiesner; Marcela Mercado-Reyes; María T. Herrera-Sepúlveda; Marta Lopez Blanco; Martha Lucia Ospina Martinez; Paola Rojas; Sergio Gomez; Sheryll Corchuelo; Ángela Alarcon Cruz                                                                                                                                                                                                                                                                                                                                                                                                                                                                                                                                                                                                                                                                                                                                                                                                                                                                             |
| EPI_ISL_1091261                                                                                     | Laboratorio de Apoyo a la Vigilancia e Investigación Epidemiológica - CIBO                                                                                                                                                                                                                                       | Laboratorio de Infectología Molecular, Departamento de Bioquímica y Medicina Molecular,Facultad de Medicina - Universidad Autónoma de Nuevo León                                                    | Alma M. Perez-Rios; Ana M. Rivas-Estilla; Blanca M. Torres; Claudia L. Charles-Niño; Daniel Arellanos-Soto; Diego A. Gonzalez-Altamirano; Hector Montoya-Fuentes; Javier Ramos-Jimenez; Jose J. Figueroa-Delgadillo; Karne A. Galán-Huerta; María F. Herrera-Saldivar; Natalia Martínez-Acuña; Rafael Soto-Alvarez; Sonia A. Lozano-Sepúlveda                                                                                                                                                                                                                                                                                                                                                                                                                                                                                                                                                                                                                                                                                                                                                                                                                                                                                                                                                                                             |
| EPI_ISL_2802862                                                                                     | Laboratorio de Biología Molecular, Hospital General de Guayaramerin, Beni, Bolivia                                                                                                                                                                                                                               | Microbiología Molecular, Instituto SELADIS, Universidad Mayor de San Andrés                                                                                                                         | Aneth Vasquez Michel; Carmen Delgado Barrera; Oscar M. Rollano-Peñaloza; Sandra Miranda Sardon                                                                                                                                                                                                                                                                                                                                                                                                                                                                                                                                                                                                                                                                                                                                                                                                                                                                                                                                                                                                                                                                                                                                                                                                                                            |
| EPI_ISL_2462063                                                                                     | Laboratorio de Biología Molecular, Hospital San Pedro Claver                                                                                                                                                                                                                                                     | Microbiología Molecular, Instituto SELADIS, Universidad Mayor de San Andrés                                                                                                                         | Aneth Vasquez Michel; Carmen Delgado Barrera; Oscar M. Rollano-Peñaloza; Sandra Miranda Sardon                                                                                                                                                                                                                                                                                                                                                                                                                                                                                                                                                                                                                                                                                                                                                                                                                                                                                                                                                                                                                                                                                                                                                                                                                                            |
| EPI_ISL_1278277, EPI_ISL_2600378                                                                    | Laboratorio de Biología Molecular, Hospital San Pedro Claver                                                                                                                                                                                                                                                     | Molecular Genetics Laboratory, Instituto de Investigaciones Químicas, Universidad Mayor de San Andrés                                                                                               | Aneth Vasquez Michel; Carmen Delgado Barrera; Oscar M. Rollano-Peñaloza; Sandra Miranda Sardon                                                                                                                                                                                                                                                                                                                                                                                                                                                                                                                                                                                                                                                                                                                                                                                                                                                                                                                                                                                                                                                                                                                                                                                                                                            |
| EPI_ISL_457953, EPI_ISL_457967                                                                      | Laboratorio de Biología Molecular Asociación Española Primera en Salud                                                                                                                                                                                                                                           | Departments of Pathology and Medicine, New York University School of Medicine                                                                                                                       | Adriana Heguy; Christian Marier; Gael Westby; Gonzalo Manrique; Maria Noel Zubillaga; Maria Victoria Elizondo; Matthew T Mauroano; Paul Zappile                                                                                                                                                                                                                                                                                                                                                                                                                                                                                                                                                                                                                                                                                                                                                                                                                                                                                                                                                                                                                                                                                                                                                                                           |
| EPI_ISL_2427584, EPI_ISL_2427666                                                                    | Laboratorio de Biología Molecular Médica Uruguaya                                                                                                                                                                                                                                                                | Departments of Pathology and Medicine, New York University School of Medicine                                                                                                                       | Adriana Heguy; Cecilia Sorhouet; Christian Marier; Dacia Dimartino; Gonzalo Manrique; Maria Cristina Mogdasy; Maria Noel Zubillaga; Maria Victoria Elizondo; Paul Zappile                                                                                                                                                                                                                                                                                                                                                                                                                                                                                                                                                                                                                                                                                                                                                                                                                                                                                                                                                                                                                                                                                                                                                                 |
| EPI_ISL_3090033                                                                                     | Laboratorio de Diagnóstico Molecular, Centro de Innovación en Vigilancia Epidemiológica (CIVE), Institut Pasteur Montevideo, Uruguay                                                                                                                                                                             | Centro de Innovación en Vigilancia Epidemiológica (CIVE), Institut Pasteur Montevideo, Uruguay                                                                                                      | Alicia Costábel; Alvaro Fajardo; Ana Moller; Andrés Lizasoain; Belén González; Bernardina Rivera; Cecilia Alonso; Cecilia Salazar; Gonzalo Bello; Gonzalo Moratorio; Gregorio Iraola; Henry Alborno; Ignacio Ferrés; Javier Hurtado; Juan Zanetti; Julio Medina; Luciana Griffero; Lucía Spangenberg; Ma Noel Bentancor; Ma Pia Techera; Mailen Arleo; Martina Alonso; Matias Maidana; Mauricio Méndez; Melissa Duquia; Mercedes Paz; Natalia Rego; Natalia Reyes; Nicolas Nin; Odhille Chappos; Paula Perbolianachis; Pilar Moreno; Rodney Colina; Rodrigo Arce; Tamara Fernández-Caleiro; Tania Possi; Veronica Noya; Viviana Bortagary                                                                                                                                                                                                                                                                                                                                                                                                                                                                                                                                                                                                                                                                                                 |
| EPI_ISL_3707356                                                                                     | Laboratorio de Genómica Microbiana, Universidad Peruana Cayetano Heredia                                                                                                                                                                                                                                         | cov0953                                                                                                                                                                                             | Alejandra Dávila-Barclay; Diego Cuicapuza; Guillermo Salvatierra; Janet Huancachoque; Luis González; Pablo Tsukayama; Pedro E. Romero; Pool Marcos                                                                                                                                                                                                                                                                                                                                                                                                                                                                                                                                                                                                                                                                                                                                                                                                                                                                                                                                                                                                                                                                                                                                                                                        |
| EPI_ISL_3758939, EPI_ISL_3758941, EPI_ISL_3758949                                                   | Laboratorio de Infectología y Virologia Molecular                                                                                                                                                                                                                                                                | Laboratory of Molecular Virology, School of Medicine, Pontificia Universidad Católica de Chile                                                                                                      | Ana Maria Contreras; Andres E. Munoz-Marcos; Carlos Palma; Catalina Pardo-Roa; Constanza Maldonado; Constanza Martinez-Valdevenito; Eileen Serrano; Erick Salinas; Estefany Poblete; Francisco Melo; Jennifer Angulo; Jorge Levican; Leonardo I. Almonacid; M. Belen Leyton; Marcela Ferres; Maria Jose Avendano; Rafael A. Medina; Tamara Garcia-Salum                                                                                                                                                                                                                                                                                                                                                                                                                                                                                                                                                                                                                                                                                                                                                                                                                                                                                                                                                                                   |

|                                                                                                                                                                          |                                                                                                                                                                                                                                                                                                                                                                                                                                                                                                                                                                                                                                                                                                                                                                                                                                                |                                                                                                                                                                                                                                                                |                                                                                                                                                                                                                                                                                                                                                                                                                                                                                                                                                                                                                                                                                                                                                                                                                                                                                                                                                                                                                                                                                                                                 |
|--------------------------------------------------------------------------------------------------------------------------------------------------------------------------|------------------------------------------------------------------------------------------------------------------------------------------------------------------------------------------------------------------------------------------------------------------------------------------------------------------------------------------------------------------------------------------------------------------------------------------------------------------------------------------------------------------------------------------------------------------------------------------------------------------------------------------------------------------------------------------------------------------------------------------------------------------------------------------------------------------------------------------------|----------------------------------------------------------------------------------------------------------------------------------------------------------------------------------------------------------------------------------------------------------------|---------------------------------------------------------------------------------------------------------------------------------------------------------------------------------------------------------------------------------------------------------------------------------------------------------------------------------------------------------------------------------------------------------------------------------------------------------------------------------------------------------------------------------------------------------------------------------------------------------------------------------------------------------------------------------------------------------------------------------------------------------------------------------------------------------------------------------------------------------------------------------------------------------------------------------------------------------------------------------------------------------------------------------------------------------------------------------------------------------------------------------|
| EPI_ISL_779175                                                                                                                                                           | Laboratorio de Infectología, Servicio de Infectología, Hospital Universitario Dr. José Eleuterio González - Universidad Autónoma de Nuevo León                                                                                                                                                                                                                                                                                                                                                                                                                                                                                                                                                                                                                                                                                                 | Laboratorio de Infectología Molecular, Departamento de Bioquímica y Medicina Molecular, Facultad de Medicina - Universidad Autónoma de Nuevo León                                                                                                              | Adrian Camacho-Ortiz; Ana M. Rivas-Estilla; Daniel Arellanos-Soto; Eduardo Perez-Alba; Elvira Garza-González; Kame A. Galán-Huerta; Laura Nuzzolo-Shihadeh; María F. Herrera-Saldivar; Natalia Martínez-Acuña; Paola Bocanegra-Ibarias; Samantha M. Flores-Treviño; Sonia A. Lozano-Sepúlveda                                                                                                                                                                                                                                                                                                                                                                                                                                                                                                                                                                                                                                                                                                                                                                                                                                   |
| EPI_ISL_792507                                                                                                                                                           | Laboratorio de Inmunología del Hospital Perrando e Instituto de Medicina Regional de la UNNE                                                                                                                                                                                                                                                                                                                                                                                                                                                                                                                                                                                                                                                                                                                                                   | Grupo de Genómica y Bioinformática del Instituto de Investigación de la Cadena Láctea CONICET-INTA on behalf of 'Proyecto Argentino Interinstitucional de genómica de SARS-CoV-2' (PAIS Consortium)                                                            | A; AF; Amadio; Ayala; Cayré; Deluca; Eberhardt; Foussal; G; Giusiano; Gómez; H; Irazoqui; JM; L; Lescano; Lucero; M; MD; MF; MV; Marin; NA                                                                                                                                                                                                                                                                                                                                                                                                                                                                                                                                                                                                                                                                                                                                                                                                                                                                                                                                                                                      |
| EPI_ISL_2674333                                                                                                                                                          | Laboratorio de Inmunología y Biología Molecular                                                                                                                                                                                                                                                                                                                                                                                                                                                                                                                                                                                                                                                                                                                                                                                                | Instituto Nacional de Salud- Dirección de Investigación en Salud Pública                                                                                                                                                                                       | Carlos Franco-Muñoz; Carmen Osorio; Diana Malo; Diego A. Álvarez-Díaz; Diego Andrés Prada; Gerardo Santamaría; Hector Alejandro Ruiz-Moreno; Jhonattan Reales-González; Jorge Rivera; Juan Camilo Martínez; Julian Naizaque; Katherine Laiton-Donato; Lisseth Pardo; Magdalena Wiesner; Marcela Mercado-Reyes; María T. Herrera-Sepúlveda; Marta Lopez Blanco; Martha Lucia Ospina Martínez; Paola Rojas; Sergio Gomez; Sheryll Corchuelo; Ángela Alarcon Cruz                                                                                                                                                                                                                                                                                                                                                                                                                                                                                                                                                                                                                                                                  |
| EPI_ISL_1672551, EPI_ISL_1700675, EPI_ISL_1700687                                                                                                                        | Laboratorio de Investigaciones de Baney                                                                                                                                                                                                                                                                                                                                                                                                                                                                                                                                                                                                                                                                                                                                                                                                        | Swiss Tropical and Public Health Institute                                                                                                                                                                                                                     | Bonifacio Manguire Nlavo; Carlos Cortes; Claudia Daubenberger; Diosdado Odjama Nseng Ada; Elizabeth Nyakarungu; Guillermo Garcia; Maximilian Mpina; Mitoha Ondo O Ayekaba; Philip Wonder Phiri; Philipp Wagner; Salome Hosch; Tobias Schindler                                                                                                                                                                                                                                                                                                                                                                                                                                                                                                                                                                                                                                                                                                                                                                                                                                                                                  |
| EPI_ISL_648306, EPI_ISL_648318, EPI_ISL_649164                                                                                                                           | Laboratorio de Investigaciones de Baney                                                                                                                                                                                                                                                                                                                                                                                                                                                                                                                                                                                                                                                                                                                                                                                                        | University Hospital Basel, Clinical Bacteriology                                                                                                                                                                                                               | Adrian Egli; Alfredo Mari; Bonifacio Manguire Nlavo; Carlos Cortes; Claudia Daubenberger; Diosdado Odjama Nseng Ada; Elizabeth Nyakarungu; Guillermo Garcia; Helena Seth-Smith; Madlen Stange; Maximilian Mpina; Mitoha Ondo O Ayekaba; Philip Wonder Phiri; Salome Hosch; Tim Roloff; Tobias Schindler                                                                                                                                                                                                                                                                                                                                                                                                                                                                                                                                                                                                                                                                                                                                                                                                                         |
| EPI_ISL_2854124, EPI_ISL_2907505                                                                                                                                         | Laboratorio de Medicina Molecular, Universidad de Magallanes                                                                                                                                                                                                                                                                                                                                                                                                                                                                                                                                                                                                                                                                                                                                                                                   | Centro Asistencial Docente y de Investigacion, Universidad de Magallanes                                                                                                                                                                                       | Constanza Ceroni; Diego Alvarez; Inés Cid; Jacqueline Aldridge; Jorge González; Marcelo Navarrete; Roberto Uribe-Paredes                                                                                                                                                                                                                                                                                                                                                                                                                                                                                                                                                                                                                                                                                                                                                                                                                                                                                                                                                                                                        |
| EPI_ISL_3761645, EPI_ISL_3761649, EPI_ISL_3761680                                                                                                                        | Laboratorio de Pesquisa em Virologia, FAMERP, SJRP                                                                                                                                                                                                                                                                                                                                                                                                                                                                                                                                                                                                                                                                                                                                                                                             | Laboratorio de Pesquisa em Virologia, FAMERP, SJRP                                                                                                                                                                                                             | Beatriz de Carvalho Marques; Cecília Artico Banho; Cintia Bittar; Fábio Sossai Possebon; Guilherme Campos; Helena Lage Ferreira; Jorge A. Petrolli Marchesi; João Pessoa Araújo Jr.; Leila Sabrina Ullmann; Livia Sacchetto; Maisa C. Pereira Parra; Marília Moraes; Maurício L. Nogueira.; Paula Rahal; Paulo Inacio da Costa                                                                                                                                                                                                                                                                                                                                                                                                                                                                                                                                                                                                                                                                                                                                                                                                  |
| EPI_ISL_2462066                                                                                                                                                          | Laboratorio de Referencia Departamental en Inmunología, Sedes-Pando                                                                                                                                                                                                                                                                                                                                                                                                                                                                                                                                                                                                                                                                                                                                                                            | Molecular Genetics Laboratory, Instituto de Investigaciones Químicas, Universidad Mayor de San Andrés                                                                                                                                                          | Aneth Vasquez Michel; Carmen Delgado Barrera; Oscar M. Rollano-Peñaloza; Sandra Miranda Sardon                                                                                                                                                                                                                                                                                                                                                                                                                                                                                                                                                                                                                                                                                                                                                                                                                                                                                                                                                                                                                                  |
| EPI_ISL_1111440                                                                                                                                                          | Laboratorio de Referencia Nacional de Enteropatógenos- Instituto Nacional de Salud del Perú                                                                                                                                                                                                                                                                                                                                                                                                                                                                                                                                                                                                                                                                                                                                                    | Laboratorio de Referencia Nacional de Enteropatógenos. Instituto Nacional de Salud del Perú                                                                                                                                                                    | Fiorella Orellana Peralta; Iris Silva Molina; Junior Caro Castro; Ronnie Gavilan Chavez; Veronica Hurtado Vela; Willi Quino Sifuentes                                                                                                                                                                                                                                                                                                                                                                                                                                                                                                                                                                                                                                                                                                                                                                                                                                                                                                                                                                                           |
| EPI_ISL_489987, EPI_ISL_1093181, EPI_ISL_1532159, EPI_ISL_1532161, EPI_ISL_1532189, EPI_ISL_1534644                                                                      | Laboratorio de Referencia Nacional de Virus Respiratorio. Instituto Nacional de Salud Perú                                                                                                                                                                                                                                                                                                                                                                                                                                                                                                                                                                                                                                                                                                                                                     | Laboratorio de Referencia Nacional de Biotecnología y Biología Molecular. Instituto Nacional de Salud Perú                                                                                                                                                     | Carlos Padilla Rojas; Henri Bailon Calderon; Johanna Balbuena Torres; Johanna Balbuena Torre; Karolyn Chozo Vega; Karolyn Vega Chozo; Luis Barcena; Marco Galarza Perez; Maribel Huaringa Nuñez; Nancy Rojas Serrano; Nancy Rojas Serrano.; Omar Caceres Rey; Priscila Lope Pari                                                                                                                                                                                                                                                                                                                                                                                                                                                                                                                                                                                                                                                                                                                                                                                                                                                |
| EPI_ISL_1111296                                                                                                                                                          | Laboratorio de Referencia Nacional de Virus Respiratorio. Instituto Nacional de Salud Perú                                                                                                                                                                                                                                                                                                                                                                                                                                                                                                                                                                                                                                                                                                                                                     | Laboratorio de Referencia Nacional de Enteropatógenos. Instituto Nacional de Salud del Perú                                                                                                                                                                    | Fiorella Orellana Peralta; Iris Silva Molina; Junior Caro Castro; Ronnie Gavilan Chavez; Veronica Hurtado Vela; Willi Quino Sifuentes                                                                                                                                                                                                                                                                                                                                                                                                                                                                                                                                                                                                                                                                                                                                                                                                                                                                                                                                                                                           |
| EPI_ISL_540940, EPI_ISL_812459                                                                                                                                           | Laboratorio de Referencia Nacional de Virus Respiratorios, Instituto Nacional de Salud Peru                                                                                                                                                                                                                                                                                                                                                                                                                                                                                                                                                                                                                                                                                                                                                    | Laboratorio de Genómica Microbiana, Universidad Peruana Cayetano Heredia                                                                                                                                                                                       | Alejandra Dávila-Barclay; Brenda Ayzanoa; Camila Castillo-Vilcahuaman; Camila Castillo-Vilcahuamán; Guillermo Salvatierra; Janet Huancachoque; Luis González; Maribel Huaringa; Nancy Rojas; Oscar Escalante; Pablo Tsukayama; Pedro E. Romero; Pool Marcos; Priscila Lope                                                                                                                                                                                                                                                                                                                                                                                                                                                                                                                                                                                                                                                                                                                                                                                                                                                      |
| EPI_ISL_3401450, see above                                                                                                                                               | EPI_ISL_3401473, EPI_ISL_3401542, EPI_ISL_3537667, EPI_ISL_3546953, EPI_ISL_3670590, EPI_ISL_3672420, EPI_ISL_3672431, EPI_ISL_3826431, EPI_ISL_3826856, EPI_ISL_3826902, EPI_ISL_3826933, EPI_ISL_3826947, EPI_ISL_3826980                                                                                                                                                                                                                                                                                                                                                                                                                                                                                                                                                                                                                    | Laboratorio de Referencia Nacional de Virus Respiratorios. Centro Nacional de Salud Publica. Instituto Nacional de Salud Peru.                                                                                                                                 | Carlos Padilla Rojas; Henri Bailon Calderon; Iris Silva Molina; Joseph Huayra Niquen; Lely Solari Zepa; Luis Barcena Flores; Marco Galarza Perez; Nancy Rojas Serrano; Nieves Sevilla Castañeda; Omar Caceres Rey; Orson Mestanza Millones; Princesa Medrano Alhuay; Priscila Lope Pari; Sandra Morales Ruiz; Sara Gordillo Vilchez; Steve Acedo Lazo; Veronica Hurtado Vela; Victor Jimenez Vasquez; Wendy Lizarraga Olivares                                                                                                                                                                                                                                                                                                                                                                                                                                                                                                                                                                                                                                                                                                  |
| EPI_ISL_2536768, see above                                                                                                                                               | EPI_ISL_2536769, EPI_ISL_2536771, EPI_ISL_2844707, EPI_ISL_3023630, EPI_ISL_3376240, EPI_ISL_3376267, EPI_ISL_3376273, EPI_ISL_3376281, EPI_ISL_3376346, EPI_ISL_3376403                                                                                                                                                                                                                                                                                                                                                                                                                                                                                                                                                                                                                                                                       | Laboratorio de Referencial Nacional de Virus Respiratorios                                                                                                                                                                                                     | Carlos Padilla Rojas; Henri Bailon Calderon; Iris Silva Molina; Joseph Huayra Niquen; Lely Solari Zepa; Luis Barcena Flores; Marco Galarza Perez; Nancy Rojas Serrano; Omar Caceres Rey; Orson Mestanza Millones; Priscila Lope Pari; Sandra Morales Ruiz; Steve Acedo Lazo; Veronica Hurtado Vela                                                                                                                                                                                                                                                                                                                                                                                                                                                                                                                                                                                                                                                                                                                                                                                                                              |
| EPI_ISL_3275283                                                                                                                                                          | Laboratorio de Vigilancia en Salud Pública el Salvador                                                                                                                                                                                                                                                                                                                                                                                                                                                                                                                                                                                                                                                                                                                                                                                         | Genomics and Proteomics Department, Gorgas Memorial Institute For Health Studies                                                                                                                                                                               | Alexander Martinez; Ambar Moreno; Claudia Díaz; Claudia Gonzalez; Denis G Jovel A; Gustavo M Ramirez; Jessica Gondola; Leyda Abrego; Marlene Castillo; Oris Chavarria; Ruth C Vasquez C; Sandra Paola Paz                                                                                                                                                                                                                                                                                                                                                                                                                                                                                                                                                                                                                                                                                                                                                                                                                                                                                                                       |
| EPI_ISL_2965572, EPI_ISL_3090040                                                                                                                                         | Laboratorio de Virología Molecular, Centro Universitario Regional del Litoral Norte. Universidad de la República, Salto, Uruguay                                                                                                                                                                                                                                                                                                                                                                                                                                                                                                                                                                                                                                                                                                               | Centro de Innovación en Vigilancia Epidemiológica (CIVE), Institut Pasteur Montevideo, Uruguay                                                                                                                                                                 | Alicia Costáble; Alvaro Fajardo; Ana Moller; Andrés Lisoasoín; Belén González; Bernardina Rivera; Cecilia Alonso; Cecilia Salazar; Gonzalo Bello; Gonzalo Moratorio; Gregorio Iraola; Henry Albornoz; Ignacio Ferrés; Javier Hurtado; Juan Zanetti; Julio Medina; Luciana Griffero; Lucía Spangenberg; Ma Noel Bentancor; Ma Pia Techer; Malien Arleo; Martina Alonso; Matias Maidana; Mauricio Méndez; Melissa Duguia; Mercedes Paz; Natalia Rego; Natalia Reyes; Nicolas Nin; Odhille Chappos; Paula Perbolianachis; Pilar Moreno; Rodney Colina; Rodrigo Arce; Tamara Fernández-Calero; Tania Possi; Veronica Noya; Viviana Bortagaray                                                                                                                                                                                                                                                                                                                                                                                                                                                                                       |
| EPI_ISL_792177, EPI_ISL_1396215, EPI_ISL_2007500                                                                                                                         | Laboratorio de Virología del Hospital de Niños Dr. Ricardo Gutierrez                                                                                                                                                                                                                                                                                                                                                                                                                                                                                                                                                                                                                                                                                                                                                                           | Área de Secuenciación del Laboratorio de Virología del Hospital de Niños Dr. Ricardo Gutierrez on behalf of 'Proyecto Argentino Interinstitucional de genómica de SARS-CoV-2' (PAIS Consortium)                                                                | A; AS; Acevedo; Acuña; Alexay; Alvarez Lopez; Barreda Frank; C; D; E; G; Goya; Grandis; Gravis; Jacques; LE; Labarta; Lusso; M; ME; MI; MS; Medina; Mischchenko; N; Nabaes Jodar; Natale; O; S; Streitenberger; Thomas; Valinotto; Viegas, M.; Villegas                                                                                                                                                                                                                                                                                                                                                                                                                                                                                                                                                                                                                                                                                                                                                                                                                                                                         |
| EPI_ISL_1396128                                                                                                                                                          | Laboratorio de la Dirección de Epidemiología                                                                                                                                                                                                                                                                                                                                                                                                                                                                                                                                                                                                                                                                                                                                                                                                   | Área de Secuenciación del Laboratorio de Virología del Hospital de Niños Dr. Ricardo Gutierrez on behalf of 'Proyecto Argentino Interinstitucional de genómica de SARS-CoV-2' (PAIS Consortium)                                                                | AG; Acuña; Alexay; Bertone; C; D; Goya; JC; LE; Lusso; M; MI; Nabaes Jodar; Natale; Rechimont; S; Usero; Valinotto; Viegas, M.; Villasana                                                                                                                                                                                                                                                                                                                                                                                                                                                                                                                                                                                                                                                                                                                                                                                                                                                                                                                                                                                       |
| EPI_ISL_3044157, EPI_ISL_3055566                                                                                                                                         | Laboratorio de salud publica Puebla                                                                                                                                                                                                                                                                                                                                                                                                                                                                                                                                                                                                                                                                                                                                                                                                            | LABOPAT                                                                                                                                                                                                                                                        | Cynthia Penaloza; Luis Mendoza; Silvia Montilla                                                                                                                                                                                                                                                                                                                                                                                                                                                                                                                                                                                                                                                                                                                                                                                                                                                                                                                                                                                                                                                                                 |
| EPI_ISL_1396354                                                                                                                                                          | Laboratorio del Hospital Regional Ushuaia Gdor. Ernesto Campos                                                                                                                                                                                                                                                                                                                                                                                                                                                                                                                                                                                                                                                                                                                                                                                 | Nodo de Secuenciación Tierra del Fuego - Hospital Regional Ushuaia - Centro Austral De Investigaciones Científicas - Universidad Nacional De Tierra Del Fuego on behalf of 'Proyecto Argentino Interinstitucional de genómica de SARS-CoV-2' (PAIS Consortium) | Alejandro Ezequiel Rojas; Carina Andrea De Roccis; Carolina Beatriz Yulan; Cristina Fernanda Nardi; Fernando Gallego; Gabriel Alejandro Castro; Ivan Dario Gramundi; Manuel Fabian Boutoureira; Santiago Guillermo Ceballos; Silvana Beatriz Cáceres                                                                                                                                                                                                                                                                                                                                                                                                                                                                                                                                                                                                                                                                                                                                                                                                                                                                            |
| EPI_ISL_791977                                                                                                                                                           | Laboratorium Mikrobiologi Samarinda                                                                                                                                                                                                                                                                                                                                                                                                                                                                                                                                                                                                                                                                                                                                                                                                            | National Institute of Health Research and Development                                                                                                                                                                                                          | AA; HA; HD; Ikawati; KD; KNA; N; Nugraha; Pangesti; Pawestri; Puspa; Puspandari; Setiawaty; Soekarso; Subangkit; T; Tandirogang; V; Yadi                                                                                                                                                                                                                                                                                                                                                                                                                                                                                                                                                                                                                                                                                                                                                                                                                                                                                                                                                                                        |
| EPI_ISL_2897143                                                                                                                                                          | Laboratorium Mikrobiologiczne z Pracownia Cytologiczną Szpital Specjalistyczny w Mielcu                                                                                                                                                                                                                                                                                                                                                                                                                                                                                                                                                                                                                                                                                                                                                        | 1. Tricity SARS-CoV-2 sequencing consortium: University of Gdansk, Medical University of Gdansk, Vaxican Ltd., Invicta Ltd. 2. National Institute of Public Health - National Institute of Hygiene, Warsaw, Poland                                             | Celina Cybulska; Karolina Gackowska; Katarzyna Groth; Katarzyna Zacharczuk; Krystyna Bienkowska Szewczyk; Lukasz Rabalski; Maciej Grzybek; Maciej Kosinski; Magdalena Nowakowska; Marcin Lubocki; Małgorzata Sadkowska-Todys; Tomasz Wolkowicz                                                                                                                                                                                                                                                                                                                                                                                                                                                                                                                                                                                                                                                                                                                                                                                                                                                                                  |
| EPI_ISL_3086894                                                                                                                                                          | Laboratorium Riset Unsoed                                                                                                                                                                                                                                                                                                                                                                                                                                                                                                                                                                                                                                                                                                                                                                                                                      | Indonesian Institute of Sciences (LIPI) and Laboratorium Riset Universitas Jenderal Soedirman                                                                                                                                                                  | Dody Novrial; Endang S. Kusmintarsih; Idris; Indriawati; Isa Nuryana; M. M. Rudi Prihatno; M. Z. Syamsul Hidayat; Puspita Lisdiyanti; Sugiyono Saputra; Syaiful Rizal; Syam B. Iryanto                                                                                                                                                                                                                                                                                                                                                                                                                                                                                                                                                                                                                                                                                                                                                                                                                                                                                                                                          |
| EPI_ISL_3281521                                                                                                                                                          | Laboratory CREAMS (from Russian) in Kindia, Guinea                                                                                                                                                                                                                                                                                                                                                                                                                                                                                                                                                                                                                                                                                                                                                                                             | Department of Microbiology, Russian Anti-Plague Research Institute                                                                                                                                                                                             | A. Yu. Popova; A.A. Kritsky; A.D. Katyshev; A.P. Shevtsova; A.V. Fedorov; E.A. Naryshkina; E.A. Sosodova; E.V. Kazorina; E.V. Kolomoets; M. Keita; N.P. Guseva; S. Keita; S.A. Shcherbakova; V.V. Kutryev; Ya.M. Krasnov                                                                                                                                                                                                                                                                                                                                                                                                                                                                                                                                                                                                                                                                                                                                                                                                                                                                                                        |
| EPI_ISL_2045671, EPI_ISL_3328522, EPI_ISL_3329005, EPI_ISL_3329878, EPI_ISL_3477550, EPI_ISL_3749939, EPI_ISL_3750159, EPI_ISL_3750307, EPI_ISL_3751995, EPI_ISL_3755692 | EPI_ISL_2045813, EPI_ISL_2045610, EPI_ISL_2046560, EPI_ISL_2046599, EPI_ISL_2046602, EPI_ISL_2183731, EPI_ISL_2184150, EPI_ISL_2184941, EPI_ISL_2185426, EPI_ISL_2305099, EPI_ISL_2306587, EPI_ISL_2398034, EPI_ISL_2398582, EPI_ISL_2482157, EPI_ISL_2873174, EPI_ISL_2927206, EPI_ISL_2927727, EPI_ISL_3017067, EPI_ISL_3327656, EPI_ISL_3328522, EPI_ISL_3329005, EPI_ISL_3329878, EPI_ISL_3512464, EPI_ISL_3514152, EPI_ISL_3514843, EPI_ISL_3514969, EPI_ISL_3515927, EPI_ISL_3517402, EPI_ISL_3604638, EPI_ISL_3676373, EPI_ISL_3679391, EPI_ISL_3680020, EPI_ISL_3681592, EPI_ISL_3682422, EPI_ISL_3683477, EPI_ISL_3685927, EPI_ISL_3686439, EPI_ISL_3740712, EPI_ISL_3741037, EPI_ISL_3741930, EPI_ISL_3742316, EPI_ISL_3743123, EPI_ISL_3747750, EPI_ISL_3749939, EPI_ISL_3750159, EPI_ISL_3750307, EPI_ISL_3751995, EPI_ISL_3755692 | Centers for Disease Control and Prevention Division of Viral Diseases, Pathogen Discovery                                                                                                                                                                      | Adrian Paskey; Amanda Douglas; Amanda Suchanek; Andrea Throop; Ayla Burns; Benjamin Rambo-Martin; Bobbi Croy; Brian Krueger; Brian Norvell; Christopher Gulvick; Christos Petropoulos; Clinton Paden; Clinton R. Paden; Craig Lukasik; Dakota Howard; Darlene Wagner; Debbie Boles; Dhwanji Batra; Duncan MacCannell; Eyad Almasri; Goran Stevovic; Howard Engler; Hrushikesh Deshmukh; Jake Humphrey; Jana Schroth; Jason Caravas; Joe Voshell; John Pruitt; Jonathan Meitzer; Jonathan Williams; Kara Moser; Kimberly Wagner; Lax Iyer; Lisa Pfefferle; Lyndon Tilson; Manoj Jain; Marcia Eisenberg; Mary Ann Cristobal; Mary Cristobal; Mary Williamson; Matthew Robinson; Matthew Schmermer; Michael Levandoski; Mike Sapeta; Mindy Nye; Minoo Agarwal; Mohan Kolli; Nuthawin Charoensri; Oren Cohen; Peter Cook; Peter W. Cook; Prashant Gupta; Qian Zeng; Rama Ghatti; Scott Parker; Scott Ryan; Scott Sammons; Shatavia Morrison; Stanley Letovsky; Steven Ragan; Suresh Babu Selvaraju; Susan Countrymen; Susan Hicks; Suzanne Dale; Thomas Urban; Tim Kuphal; Tricia Zwiefelhofer; Vincent Drouillon; Yvette Unoarumhi |
| EPI_ISL_541651, EPI_ISL_3102050                                                                                                                                          | Laboratory Diagnostic, Veterinary Specialized Institute Kraljevo                                                                                                                                                                                                                                                                                                                                                                                                                                                                                                                                                                                                                                                                                                                                                                               | Laboratory Diagnostic, Veterinary Specialized Institute Kraljevo                                                                                                                                                                                               | Afonso, C.; Banovic Djeri, B.; Djukic, V.; Jankovic, M.; Jovanovic, T.; Knezevic, A.; Petrovic, T.; Sekler, M.; Tesovic, B.; Vidanovic, D.; Volkening, J.                                                                                                                                                                                                                                                                                                                                                                                                                                                                                                                                                                                                                                                                                                                                                                                                                                                                                                                                                                       |
| EPI_ISL_754906                                                                                                                                                           | Laboratory Diagnostics and Clinical Immunology of Developmental Age, Medical University of Warsaw                                                                                                                                                                                                                                                                                                                                                                                                                                                                                                                                                                                                                                                                                                                                              | genXone SA, Research & Development Laboratory; The Faculty of Mathematics, Informatics and Mechanics of the University of Warsaw                                                                                                                               | Anna Gambin; Grzegorz Nowicki; Jakub Grabowski; Maciej Sykulski; Michał Kaszuba; Monika Mańkowska-Woźniak; Natalia Drwęska-Matelska; Urszula Demkow; Lukasz Krych                                                                                                                                                                                                                                                                                                                                                                                                                                                                                                                                                                                                                                                                                                                                                                                                                                                                                                                                                               |
| EPI_ISL_411915                                                                                                                                                           | Laboratory Medicine                                                                                                                                                                                                                                                                                                                                                                                                                                                                                                                                                                                                                                                                                                                                                                                                                            | Department of Laboratory Medicine, Lin-Kou Chang Gung Memorial Hospital, Taoyuan, Taiwan                                                                                                                                                                       | Chung-Guei Huang; Kuo-Chien Tsao; Shin-Ru Shih; Shu-Li Yang; Yhu-Chering Huang; Yi-Chun Li; Yu-Nong Gong                                                                                                                                                                                                                                                                                                                                                                                                                                                                                                                                                                                                                                                                                                                                                                                                                                                                                                                                                                                                                        |
| EPI_ISL_1138969, EPI_ISL_1653933                                                                                                                                         | Laboratory for HIV and opportunistic infections The Republican Research and Practical Center for Epidemiology and Microbiology (RRPCEM)                                                                                                                                                                                                                                                                                                                                                                                                                                                                                                                                                                                                                                                                                                        | Laboratory for HIV and opportunistic infections diagnosis The Republican Research and Practical Center for Epidemiology and Microbiology (RRPCEM)                                                                                                              | Alena Mikhalenka; Alexander Kilchevsky; Alina Drozd; Analoly Krasko; Anatoly Krasko; Artur Akhremchuk; Elena Gasich; Katsiaryna Belyakova; Kirill Bulda; Leonid Valentovich; Nastassia Kabankova; Vladimir Gorbunov; Yauhen Sysaliatsin                                                                                                                                                                                                                                                                                                                                                                                                                                                                                                                                                                                                                                                                                                                                                                                                                                                                                         |

|                                                                                                                                        |                                                                                                                                                                                                                                                        |                                                                                                                                                                                                                                                                                                                                                                           |                                                                                                                                                                                                                                                                                                                                                                                                                                                                                                           |
|----------------------------------------------------------------------------------------------------------------------------------------|--------------------------------------------------------------------------------------------------------------------------------------------------------------------------------------------------------------------------------------------------------|---------------------------------------------------------------------------------------------------------------------------------------------------------------------------------------------------------------------------------------------------------------------------------------------------------------------------------------------------------------------------|-----------------------------------------------------------------------------------------------------------------------------------------------------------------------------------------------------------------------------------------------------------------------------------------------------------------------------------------------------------------------------------------------------------------------------------------------------------------------------------------------------------|
| EPI_ISL_3550693, EPI_ISL_3556740, EPI_ISL_3558549, EPI_ISL_3559403, EPI_ISL_3564524                                                    | Laboratory for Molecular Diagnostics, IPHMN                                                                                                                                                                                                            | Eurofins Genomics Europe Sequencing GmbH                                                                                                                                                                                                                                                                                                                                  | Danijela Vujošević; Marija Govedarica                                                                                                                                                                                                                                                                                                                                                                                                                                                                     |
| EPI_ISL_3631535, EPI_ISL_3665934, EPI_ISL_3696514, EPI_ISL_3707592                                                                     | Laboratory for Molecular Diagnostics, IPHMN                                                                                                                                                                                                            | Eurofins Genomics Europe Sequencing GmbH                                                                                                                                                                                                                                                                                                                                  | Danijela Vujošević                                                                                                                                                                                                                                                                                                                                                                                                                                                                                        |
| EPI_ISL_435045, EPI_ISL_435047                                                                                                         | Laboratory of Applied Genetics                                                                                                                                                                                                                         | RSE "National Center for Biotechnology"                                                                                                                                                                                                                                                                                                                                   | Alexandr Shevtsov; Asylulan Amirgazin; Ilyas Akhmetollayev; Ruslan Kalendar; Viktoriya Lutsay; Yerlan Ramanculov                                                                                                                                                                                                                                                                                                                                                                                          |
| EPI_ISL_3769274                                                                                                                        | Laboratory of Clinical Microbiology, Virology and Bioemergencies, ASST Fatebenefratelli Sacco - Sacco Hospital                                                                                                                                         | Laboratory of Clinical Microbiology, Virology and Bioemergencies, ASST Fatebenefratelli Sacco - Sacco Hospital                                                                                                                                                                                                                                                            | Valeria Micheli                                                                                                                                                                                                                                                                                                                                                                                                                                                                                           |
| EPI_ISL_2376813                                                                                                                        | Laboratory of Clinical Virology                                                                                                                                                                                                                        | Greek Genome Center, Biomedical Research Foundation of the Academy of Athens (BRFAA)                                                                                                                                                                                                                                                                                      | Dimitrios Thanos; Emmanouil Athanasiadis; George Sourvinos; Giannis Vatsellas; Katerina Zoi; Theodoros Loupis                                                                                                                                                                                                                                                                                                                                                                                             |
| EPI_ISL_2365282                                                                                                                        | Laboratory of Clinical Virology                                                                                                                                                                                                                        | Greek Genome Center, Biomedical Research Foundation of the Academy of Athens (BRFAA)                                                                                                                                                                                                                                                                                      | Dimitrios Thanos; Emmanouil Athanasiadis; George Sourvinos; Giannis Vatsellas; Katerina Zoi; Theodoros Loupis                                                                                                                                                                                                                                                                                                                                                                                             |
| EPI_ISL_3453172                                                                                                                        | Laboratory of Microbiology and Virology, Ospedale Amedeo di Savoia, ASL "Città di Torino"                                                                                                                                                              | Laboratory of Microbiology and Virology, Ospedale Amedeo di Savoia, ASL "Città di Torino"                                                                                                                                                                                                                                                                                 | Antonella Bottoni; Elisa Burdino; Francesco Cerutti; Gabriella Gregori; Maria Grazia Milia; Paola Tremante; Tiziano Alice; Valeria Ghisetti                                                                                                                                                                                                                                                                                                                                                               |
| EPI_ISL_654017, EPI_ISL_654019, EPI_ISL_2896981                                                                                        | Laboratory of Microbiology, National Reference Lab, Charles Nicolle Hospital; 2- University of Tunis ElManar, Faculty of Medicine of Tunis, LR99ES09, Tunis, Tunisia                                                                                   | 1-Clinical and Experimental Pharmacology Lab, LR16SP02, National Center of Pharmacovigilance, University of Tunis El Manar, Tunis, Tunisia. 2- Neurodegenerative diseases and psychiatric troubles, LR18SP03, Razi Hospital, University of Tunis El Manar, Tunis, Tunisia. 3- Ministry of Health, National Observatory of New and Emerging Diseases, 1006, Tunis, Tunisia | Alia Ben Kahla; Alia Benkahla; Emna Gaies; Gaies Emna; Ilhem Boutiba-Ben Boubaker; Ilhem Boutiba-Ben Boubaker; Imen Kacem; Imen Mkada; Ines Mdimi; Jalila Ben Khelil; Maher Kharrrat; Mouna Ben Sassi; Mouna Safer; Nissaf Ben Alaya; Riadh Daghfous; Riadh Gouider; Riadh Gouider.; Roua Ben Othman; Salma Abid; Sameh Trabelsi; Sana Ferjani; Sarra Chammar; Soumaya Rammeh                                                                                                                             |
| EPI_ISL_3343233, EPI_ISL_3343988, EPI_ISL_3344064, EPI_ISL_3344067                                                                     | Laboratory of Molecular Biology and Cancer Immunology                                                                                                                                                                                                  | Quadram Institute Bioscience                                                                                                                                                                                                                                                                                                                                              | Abdul K. Sessay; Alexander J. Trotter; Andrew J. Page; Bassam Badran; Georgi Merhi; Hala Abou Naja; Hamad Hasan; Jad Koweyes; Janine M. Wilkinson; Kate A. Makin; Leonardo de Oliveira Martins; Mark Pallen; Mark Webber; Martin Lott; Matthew W. Felgate; Mona Al Buaini; Nabil-Fareed Alikhan; Nada Ghosn; Orla J. Jupp; Rachael Stanley; Rose K. Davidson; Sarah Gardener; Sima Tokajian; Sophie J. Prosolek; Tatiana Tohmeh; Thanh Le-Viet                                                            |
| EPI_ISL_2893220, EPI_ISL_2893222, EPI_ISL_3062345, EPI_ISL_3233197                                                                     | Laboratory of Molecular Biology and Cancer Immunology, Faculty of Sciences, Lebanese University                                                                                                                                                        | Microbial Pathogenomics Lab - LAU                                                                                                                                                                                                                                                                                                                                         | Bassam Badran; Fadi Abdel Sater; Georgi Merhi; Hamad Hassan; Jad Koweyes; Nada Ghosn; Rawan Makki; Sima tokajian; Tatiana Tohmeh                                                                                                                                                                                                                                                                                                                                                                          |
| EPI_ISL_2301775                                                                                                                        | Laboratory of Molecular Biology, Mamatsio General Hospital of Kozani                                                                                                                                                                                   | Greek Genome Center, Biomedical Research Foundation of the Academy of Athens (BRFAA)                                                                                                                                                                                                                                                                                      | Dimitrios Thanos; Emmanouil Athanasiadis; Giannis Vatsellas; Katerina Zoi; Konstantina Gartzonika; Theodoros Loupis                                                                                                                                                                                                                                                                                                                                                                                       |
| EPI_ISL_801640, EPI_ISL_801705, EPI_ISL_801841                                                                                         | Laboratory of Molecular Virology, Pontificia Universidad Católica de Chile                                                                                                                                                                             | MSHS Pathogen Surveillance Program                                                                                                                                                                                                                                                                                                                                        | Adolfo Garcia-Sastre; Adriana van De Guchte; Ajay Obla; Ana Maria Contreras; Ana S. Gonzalez-Reiche; Bremy Alburquerque; Carlos Palma; Constanza Maldonado; Edward C. Holmes; Eileen Serrano; Erick Salinas; Hala Alshammary; Harm van Bakel; Jayeeta Dutta; Jorge Levican; Juan Soto; Leonardo I. Almonacid; M. Belen Leyton; Marcela Ferres; Matthew M. Hernandez; Melissa Smith; Rafael A. Medina.; Robert Sebra; Shwetha Hara Sridhar; Tamara Garcia-Salum; Viviana Simon; Ying-Chih Wang; Zenab Khan |
| EPI_ISL_541353, EPI_ISL_3045508, EPI_ISL_941163                                                                                        | Laboratory of Respiratory Viruses and Measles, Oswaldo Cruz Institute, FIOCRUZ<br>Laboratory of Virology and Molecular Diagnostics                                                                                                                     | Laboratory of Respiratory Viruses and Measles, Oswaldo Cruz Institute, FIOCRUZ<br>Institute of Public Health of Republic of North Macedonia Laboratory of Virology and Molecular Diagnostics                                                                                                                                                                              | Agatha Cristinne Prudencio; Alice Sampaio Rocha; Ana Carolina Mendonca; Ana Carolina Mendonça; Anna Carolina Paixao; Anna Carolina Paixão; Elisa Cavalcante Pereira; Fernando Motta; Igor Leonardo Arantes Gomes; Jonathan Lopes; Luciana Appolinario; Marilda Siqueira on behalf of the Fiocruz COVID-19 Genomic Surveillance Network; Paola Resende; Renata Serrano Lopes; Taina Venas<br>Maja Kuzmanovska                                                                                              |
| EPI_ISL_451302                                                                                                                         | Laboratory of Virology, INMI Lazzaro Spallanzani IRCCS                                                                                                                                                                                                 | Laboratory of Virology, INMI Lazzaro Spallanzani IRCCS                                                                                                                                                                                                                                                                                                                    | Antonino Di Caro; Barbara Bartolini; Cesare E.M. Gruber; Francesco Messina; Giuseppe Ippolito; Maria R. Capobianchi; Martina Rueca                                                                                                                                                                                                                                                                                                                                                                        |
| EPI_ISL_1341379, EPI_ISL_1341641, EPI_ISL_1365697                                                                                      | Laboratory of Virology, National center of expertise                                                                                                                                                                                                   | RSE "National Center of Expertise" and RSE "National center for Biotechnology"                                                                                                                                                                                                                                                                                            | Abdaliyev Askar; Amirgazin Asylulan; Balykbaev Kanat; Kamalova Dinara; Ramankulov Erian; Sharipova Saule; Shevtsov Alexandr; Tungushbayev Talgat                                                                                                                                                                                                                                                                                                                                                          |
| EPI_ISL_2987561, EPI_ISL_2987564, EPI_ISL_3020337, EPI_ISL_3545681, EPI_ISL_3545687, EPI_ISL_3545707, EPI_ISL_3545717                  | see above                                                                                                                                                                                                                                              | Laboratory of virology and molecular diagnostics, Institute of Public Health                                                                                                                                                                                                                                                                                              | Boshevskva G; Buzharova T; Janchevska E.; Kuzmanovska M                                                                                                                                                                                                                                                                                                                                                                                                                                                   |
| EPI_ISL_454585                                                                                                                         | Laboratory of virology, National Center of Expertise                                                                                                                                                                                                   | Laboratory of molecular-genetic research, National Center for Expertise, Kazakhstan National Center for Biotechnology, Kazakhstan                                                                                                                                                                                                                                         | ; Abdaliyev Askar; Akhmetollayev Ilyas; Amirgazin Asylulan; Aushakhmetova Zabira; Kalendar Ruslan; Lutsay Viktoriya; Rakhmetova Akbota; Ramankulov Yerlan; Shevtsov Alexandr                                                                                                                                                                                                                                                                                                                              |
| EPI_ISL_1334517, EPI_ISL_1334570, EPI_ISL_1365036                                                                                      | Laboratory of virology, National center of expertise                                                                                                                                                                                                   | RSE "National Center for Biotechnology" and RSE "National Center of Expertise"                                                                                                                                                                                                                                                                                            | Abdaliyev Askar; Amirgazin Asylulan; Balykbaev Kanat; Kamalova Dinara; Ramankulov Yerlan; Sharipova Saule; Shevtsov Alexandr; Tungushbayev Talgat                                                                                                                                                                                                                                                                                                                                                         |
| EPI_ISL_2696312, EPI_ISL_2696321, EPI_ISL_2696354, EPI_ISL_2696629, EPI_ISL_2696713, EPI_ISL_3461287                                   | Laboratory, Gravity Diagnostics                                                                                                                                                                                                                        | Laboratory, Gravity Diagnostics                                                                                                                                                                                                                                                                                                                                           | Diagnostics, G.                                                                                                                                                                                                                                                                                                                                                                                                                                                                                           |
| EPI_ISL_576122                                                                                                                         | Laboratory, The Bio Arte Limited                                                                                                                                                                                                                       | Laboratory, The Bio Arte Limited                                                                                                                                                                                                                                                                                                                                          | Biazzo, M.; Madeddu, S.; Pinzauti, D.; Santoro, F.                                                                                                                                                                                                                                                                                                                                                                                                                                                        |
| EPI_ISL_277798, EPI_ISL_3050309                                                                                                        | Laboratório Central de Saúde Pública do Amazonas - LACEN-AM                                                                                                                                                                                            | Laboratorio de Ecologia de Doenças Transmissíveis na Amazonia, Instituto Leonidas e Maria Deane - Fiocruz Amazonia                                                                                                                                                                                                                                                        | André Corado; Debora Duarte; Felipe Naveca; Fernanda Nascimento; George Silva; Karina Pessoa; Luciana Gonçalves; Maria Júlia Brandão; Matilde Mejía; Michele Jesus; Valdinete Nascimento; Victor Souza; Ágatha Costa                                                                                                                                                                                                                                                                                      |
| EPI_ISL_2150982, EPI_ISL_2158599                                                                                                       | Laboratório de Biologia Molecular Jean Piaget                                                                                                                                                                                                          | MRCG at LSHTM, Genomics lab                                                                                                                                                                                                                                                                                                                                               | Abdouille Kante; Abdul Karim Sesay; Adul Candé; Aicha Balde; Aladje Balde; Bakary Sanyang; Bubacar Delgado Pinto Embalo; Dabiri Damilari; Edmira Maria da Costa; Erica Luis Maria Magalhães; Faatu Cassama; Mariama Kujabi; Milanca Agostinho Cá; Paulina Joãozinho da Costa Jarra Manneh; Rei José Pereira; Rui Inndi; Sainabou Laye Ndure; Simão Tchuda Biôté                                                                                                                                           |
| EPI_ISL_2466172                                                                                                                        | Laboratório de Biologia Molecular de Doenças Infecciosas e do Câncer (LADIC - UFRN)                                                                                                                                                                    | Laboratory of Respiratory Viruses and Measles, Oswaldo Cruz Institute, FIOCRUZ                                                                                                                                                                                                                                                                                            | Alice Sampaio Rocha; Ana Carolina Mendonca; Anna Carolina Paixao; Elisa Cavalcante Pereira; Fernando Motta; Josélio Araújo; Luciana Appolinario; Marilda Siqueira on behalf of the Fiocruz COVID-19 Genomic Surveillance Network; Paola Resende; Renata Serrano Lopes; Taina Venas                                                                                                                                                                                                                        |
| EPI_ISL_2835167                                                                                                                        | Laboratório de Biologia Molecular Aplicada (LBA) - Laboratório de Biologia Molecular - Hospital das Clínicas, Faculdade de Medicina de Botucatu, Departamento de Bioprocessos e Biotecnologia - Faculdade de Ciências Agronômicas, UNESP - Botucatu/SP | Laboratory of Respiratory Viruses and Measles, Oswaldo Cruz Institute, FIOCRUZ                                                                                                                                                                                                                                                                                            | Alice Sampaio Rocha; Ana Carolina Mendonca; Anna Carolina Paixao; Elisa Cavalcante Pereira; Felipe Allan da Silva Costa; Fernando Motta; Jayme Augusto de Souza Neto; Leonardo Nazario de Moraes; Luciana Appolinario; Marilda Siqueira on behalf of the Fiocruz COVID-19 Genomic Surveillance Network; Paola Resende; Patricia Akemi Assato; Rejane Maria Tommasini; Renata Serrano Lopes; Taina Venas                                                                                                   |
| EPI_ISL_2768036, EPI_ISL_2768045                                                                                                       | Labormedizinisches Zentrum Dr Risch                                                                                                                                                                                                                    | Clinical Bacteriology                                                                                                                                                                                                                                                                                                                                                     | Adrian Egli; Alfredo Mari; Fanny Wegner; Hans Hirsch; Helena MB Seth-Smith; Julia Bielicki; Karoline Leuzinger; Lorenz Risch; Manuel Battegay; Martin Risch; Nadia Wohlwend; Tim Rollof                                                                                                                                                                                                                                                                                                                   |
| EPI_ISL_2812898, EPI_ISL_3184992, EPI_ISL_3281189, EPI_ISL_3398485                                                                     | Laverty Pathology                                                                                                                                                                                                                                      | NSW Health Pathology - Institute of Clinical Pathology and Medical Research; Westmead Hospital; University of Sydney                                                                                                                                                                                                                                                      | Arnott A.; CIDM-PH et al.; Draper J.; Gali M.; Martinez E.; Rockett R.; Sintchenko V.; on behalf of ICPMR                                                                                                                                                                                                                                                                                                                                                                                                 |
| EPI_ISL_1987063, EPI_ISL_2392238, EPI_ISL_2392466, EPI_ISL_2538426, EPI_ISL_2569427, EPI_ISL_2639670, EPI_ISL_3337826, EPI_ISL_3706406 | see above                                                                                                                                                                                                                                              | Lighthouse Lab in Alderley Park                                                                                                                                                                                                                                                                                                                                           | Cordelia Langford; David K. Jackson; Dominic Kwiatkowski; Ewan Harrison; Ian Johnston; Jacquelyn Wynn; Jeffrey Barrett; John Sillitoe on behalf of the Wellcome Sanger Institute COVID-19 Surveillance Team; Mairead Hyland; Roberto Amato; Sonia Goncalves; The Lighthouse Lab in Alderley Park and Alex Alderton                                                                                                                                                                                        |
| EPI_ISL_557721                                                                                                                         | Lighthouse Lab in Alderley Park                                                                                                                                                                                                                        | Wellcome Sanger Institute for the COVID-19 Genomics UK (COG-UK) consortium                                                                                                                                                                                                                                                                                                | Cordelia Langford; David K. Jackson; Dominic Kwiatkowski; Ewan Harrison; Ian Johnston; John Sillitoe on behalf of the Wellcome Sanger Institute COVID-19 Surveillance Team; Roberto Amato; Sonia Goncalves; The Lighthouse Lab in Alderley Park and Alex Alderton                                                                                                                                                                                                                                         |
| EPI_ISL_3203057, EPI_ISL_3837631                                                                                                       | Lighthouse Lab in Glasgow                                                                                                                                                                                                                              | Wellcome Sanger Institute for the COVID-19 Genomics UK (COG-UK) Consortium                                                                                                                                                                                                                                                                                                | Anna Dominiczak and Alex Alderton; Carol Clugston; Cordelia Langford; David Gray; David K. Jackson; Dominic Kwiatkowski; Ewan Harrison; Harper VanSteenhouse; Ian Johnston; Jeffrey Barrett; John Sillitoe on behalf of the Wellcome Sanger Institute COVID-19 Surveillance Team; Roberto Amato; Sonia Goncalves; Yumi Kasai                                                                                                                                                                              |
| EPI_ISL_2317229,                                                                                                                       | Lighthouse Lab in Milton Keynes                                                                                                                                                                                                                        | Wellcome Sanger Institute for the COVID-19                                                                                                                                                                                                                                                                                                                                | Cordelia Langford; David K. Jackson; Dominic Kwiatkowski; Ewan Harrison; Ian Johnston; Jeffrey Barrett; John Sillitoe on behalf of the Wellcome Sanger Institute COVID-19 Surveillance Team; Roberto Amato; Sonia Goncalves; The Lighthouse Lab in Milton Keynes and Alex Alderton                                                                                                                                                                                                                        |

|                                                                                                                                                                                                                                                                                                                                                                                                                   |                                                                                                             |                                                                                                                      |                                                                                                                                                                                                                                                                                                                                                                                                                                                                                                                                                                                                                                                                                                                                         |
|-------------------------------------------------------------------------------------------------------------------------------------------------------------------------------------------------------------------------------------------------------------------------------------------------------------------------------------------------------------------------------------------------------------------|-------------------------------------------------------------------------------------------------------------|----------------------------------------------------------------------------------------------------------------------|-----------------------------------------------------------------------------------------------------------------------------------------------------------------------------------------------------------------------------------------------------------------------------------------------------------------------------------------------------------------------------------------------------------------------------------------------------------------------------------------------------------------------------------------------------------------------------------------------------------------------------------------------------------------------------------------------------------------------------------------|
| EPI_ISL_3095199                                                                                                                                                                                                                                                                                                                                                                                                   |                                                                                                             | Genomics UK (COG-UK) Consortium                                                                                      |                                                                                                                                                                                                                                                                                                                                                                                                                                                                                                                                                                                                                                                                                                                                         |
| EPI_ISL_770505                                                                                                                                                                                                                                                                                                                                                                                                    | Lithuanian University of Health Sciences Hospital, Department of Laboratory Medicine                        | Lithuanian University of Health Sciences, Molecular cardiology lab.                                                  | Arnoldas Pautienius; Astra Vitkauskiene; Dovydas Gecys; Ingrida Olendraitė; Kamile Tamusauskaite; Laura Pareckaite; Lukas Zemaitis; Vaiva Lesauskaite                                                                                                                                                                                                                                                                                                                                                                                                                                                                                                                                                                                   |
| EPI_ISL_2156514                                                                                                                                                                                                                                                                                                                                                                                                   | Lung Center of the Philippines (LCP)                                                                        | Philippine Genome Center                                                                                             | Alethea R. de Guzman; Anna Ong-Lim; Arianne A. Zamora; Asia Louisa U. Chong; Benedict A. Maralit; Candice Francheska B. Tambaoan; Carlo M. Lapid; Celia Carlos; Devon Ray Pacial; Edsel Maurice Salvaña; El King D. Morado; Elcid Aaron R. Pangilinan; Eva Maria Cutiongo-de la Paz; Francis A. Tablizo; Irish Coleen A. Asin; Jaime C. Montoya; Jan Michael C. Yap; Jo-Hannah S. Llamas; John Q. Wong; Joshua Gregor A. Dizon; Juan Antonio R. Magalang; Karol Sophia Agape R. Padilla; Kenneth M. Kim; Kris P. Punayan; Marc Edsel C. Ayes; Marc Jerrone R. Castro; Maria Rosario Singh-Vergeire and Cynthia P. Saloma; Maria Sofia L. Yangzon; Marissa Alejandria; Razel Nikka M. Hao; Rianna Patricia S. Cruz; Sheila Mae M. Araiza |
| EPI_ISL_1501827                                                                                                                                                                                                                                                                                                                                                                                                   | Lurie Children's Hospital of Chicago                                                                        | Northwestern University - Ozer Lab                                                                                   | Egon A. Ozer; Judd F. Hultquist; Lacy M. Simons; Larry K. Kocielek; Michael G. Ison; Ramon Lorenzo-Redondo; Taylor J. Dean; William J. Muller; Xiaotian; Zheng                                                                                                                                                                                                                                                                                                                                                                                                                                                                                                                                                                          |
| EPI_ISL_3419352                                                                                                                                                                                                                                                                                                                                                                                                   | Luzerner Kantonsspital                                                                                      | Institute for Infectious Diseases                                                                                    | Alban Ramette; Christian Baumann; Cora SÄngesser; Franziska Suter-Rinkler; Miguel A Terrazos Miani; Pascal Bittel; Peter Keller; Stefan Neuenschwander; Stephen L Leib                                                                                                                                                                                                                                                                                                                                                                                                                                                                                                                                                                  |
| EPI_ISL_2443819                                                                                                                                                                                                                                                                                                                                                                                                   | M Health Fairview                                                                                           | Minnesota Department of Health, Public Health Laboratory                                                             | Alexandra Lorentz; Jacob Garfin; Matt Plumb; and Xiong Wang                                                                                                                                                                                                                                                                                                                                                                                                                                                                                                                                                                                                                                                                             |
| EPI_ISL_2495435, EPI_ISL_2495579, EPI_ISL_3356845                                                                                                                                                                                                                                                                                                                                                                 | MB-Cadham Provincial laboratory                                                                             | National Microbiology Laboratory (NML)                                                                               | Anna Majer; Anneliese Landgraff; CanCOGeN's metadata curation team; Darian Hole; David Alexander; Elsie Grudeski; Gary Van Domselaar; Grace Seo; Jared Bullard; Jennifer Tanner; Kerry Dust; Kirsten Biggar; Madison Chapel; Morag Graham; Natalie Knox; Nathalie Bastien; Paul Van Caesele; Philip Mabon; Public Health Agency of Canada CanCOGeN team; Rhiannon Huzarewich; Russell Mandes; Shari Tyson; Timothy Booth; Yan Li                                                                                                                                                                                                                                                                                                        |
| EPI_ISL_3152348                                                                                                                                                                                                                                                                                                                                                                                                   | MD PHL                                                                                                      | Maryland Department of Health Laboratories Administration                                                            | Ami Patel; Eric N. Keller; Jillian Loomis; Kwang Low; Terence L. Moore; and Robert Myers                                                                                                                                                                                                                                                                                                                                                                                                                                                                                                                                                                                                                                                |
| EPI_ISL_903380, EPI_ISL_2557251, EPI_ISL_2557459                                                                                                                                                                                                                                                                                                                                                                  | MOH - Jaber Al-Ahmad Hospital (Innovation Research Laboratory)                                              | MOH - Jaber Al-Ahmad Hospital (Innovation Research Laboratory)                                                       | Mohammad Alghounaim; Salman Al-Sabah                                                                                                                                                                                                                                                                                                                                                                                                                                                                                                                                                                                                                                                                                                    |
| EPI_ISL_2346386, EPI_ISL_2346389                                                                                                                                                                                                                                                                                                                                                                                  | MRC/UVRI & LSHTM Uganda Research Unit, Central Public Health Laboratories                                   | MRC/UVRI & LSHTM Uganda Research Unit, Central Public Health Laboratories                                            | Dan Lule Bugembe; Isaac Sseeewanyana; Matthew Cotten; My V.T. Phan; Patrick Semanda; Pontiano Kaleebu; Susan Nabadda                                                                                                                                                                                                                                                                                                                                                                                                                                                                                                                                                                                                                    |
| EPI_ISL_3149407, EPI_ISL_3149427                                                                                                                                                                                                                                                                                                                                                                                  | MRC/UVRI & LSHTM Uganda Research Unit, Uganda Virus Research Institute                                      | MRC/UVRI & LSHTM Uganda Research Unit, Uganda Virus Research Institute                                               | ; Dan Lule Bugembe; John Kayiwa; Matthew Cotten; My V.T. Phan; Pontiano Kaleebu                                                                                                                                                                                                                                                                                                                                                                                                                                                                                                                                                                                                                                                         |
| EPI_ISL_954229, EPI_ISL_1469355, EPI_ISL_1469387                                                                                                                                                                                                                                                                                                                                                                  | MRC/UVRI & LSHTM Uganda Research Unit                                                                       | Where sequence data have been generated and submitted to GISAID                                                      | Dan Lule Bugembe; Isaac Sseeewanyana; Matthew Cotten; My V.T. Phan; Patrick Semanda; Pontiano Kaleebu; Susan Nabadda                                                                                                                                                                                                                                                                                                                                                                                                                                                                                                                                                                                                                    |
| EPI_ISL_3149373, EPI_ISL_3149392, EPI_ISL_3149398, EPI_ISL_3149402, EPI_ISL_3546312                                                                                                                                                                                                                                                                                                                               | MRC/UVRI & LSHTM Uganda Research Unit , Rakai Health Sciences Program                                       | MRC/UVRI & LSHTM Uganda Research Unit , Rakai Health Sciences Program                                                | ; Charles Ssuuna; Matthew Cotten Dan Lule Bugembe; My V.T. Phan; Pontiano Kaleebu; Ronald Moses Galiwango; Steven J Reynolds                                                                                                                                                                                                                                                                                                                                                                                                                                                                                                                                                                                                            |
| EPI_ISL_3546304, EPI_ISL_3546305, EPI_ISL_3546308, EPI_ISL_3546311                                                                                                                                                                                                                                                                                                                                                | MRC/UVRI & LSHTM Uganda Research Unit, Central Public Health Laboratories                                   | MRC/UVRI & LSHTM Uganda Research Unit, Central Public Health Laboratories                                            | Dan Lule Bugembe; Hellen Nansumba; Isaac Sseeewanyana; Matthew Cotten; My V.T. Phan; Patrick Semanda; Pontiano Kaleebu; Susan Nabadda                                                                                                                                                                                                                                                                                                                                                                                                                                                                                                                                                                                                   |
| EPI_ISL_2690464, EPI_ISL_2690470, EPI_ISL_2690472, EPI_ISL_2690477                                                                                                                                                                                                                                                                                                                                                | MRC/UVRI & LSHTM Uganda Research Unit, Central Public Health Laboratories, Rakai Health Sciences Program    | MRC/UVRI & LSHTM Uganda Research Unit, Rakai Health Sciences Program                                                 | Charles Ssuuna; Dan Lule Bugembe; Matthew Cotten; My V.T. Phan; Pontiano Kaleebu; Ronald Moses Galiwango; Steven J Reynolds                                                                                                                                                                                                                                                                                                                                                                                                                                                                                                                                                                                                             |
| EPI_ISL_3149362                                                                                                                                                                                                                                                                                                                                                                                                   | MRC/UVRI & LSHTM Uganda Research Unit, Central Public Health Laboratories                                   | MRC/UVRI & LSHTM Uganda Research Unit, Central Public Health Laboratories                                            | Dan Lule Bugembe; Hellen Nansumba; Isaac Sseeewanyana; Matthew Cotten; My V.T. Phan; Patrick Semanda; Pontiano Kaleebu; Susan Nabadda                                                                                                                                                                                                                                                                                                                                                                                                                                                                                                                                                                                                   |
| EPI_ISL_471161, EPI_ISL_471168, EPI_ISL_561038, EPI_ISL_810982, EPI_ISL_811037, EPI_ISL_1731553, EPI_ISL_2820697, EPI_ISL_2958626, EPI_ISL_2958636, EPI_ISL_2958645, EPI_ISL_2958646, EPI_ISL_2958647, EPI_ISL_3132295, EPI_ISL_3132296, EPI_ISL_3132305, EPI_ISL_3132309, EPI_ISL_3132315, EPI_ISL_3132319, EPI_ISL_3132334, EPI_ISL_3132340, EPI_ISL_3150935, EPI_ISL_3150949                                   | see above                                                                                                   | MRCG at LSHTM Genomics lab                                                                                           | Abdoulie Kante; Abdul Karim sesay; Bakary Sanyang; Dabiri Damilari; Jarra Manneh; Mariama Kujabi; Sesay et al                                                                                                                                                                                                                                                                                                                                                                                                                                                                                                                                                                                                                           |
| EPI_ISL_2920862                                                                                                                                                                                                                                                                                                                                                                                                   | MS Public Health Laboratory                                                                                 | University of Mississippi Medical Center, Molecular and Genomics Core Facility                                       | Ashley C. Johnson; D. Ashley Robinson; Ithiel J. Frame; Krishna K. Ayyalasomayajula; Michael R. Garrett; Wenjie Wu                                                                                                                                                                                                                                                                                                                                                                                                                                                                                                                                                                                                                      |
| EPI_ISL_2845238                                                                                                                                                                                                                                                                                                                                                                                                   | MVZ Dr. Eberhard & Partner Dortmund                                                                         | Robert Koch Institute                                                                                                |                                                                                                                                                                                                                                                                                                                                                                                                                                                                                                                                                                                                                                                                                                                                         |
| EPI_ISL_2869802                                                                                                                                                                                                                                                                                                                                                                                                   | MVZ Labor Krone GbR                                                                                         | Center of Medical Microbiology, Virology, and Hospital Hygiene, University of Duesseldorf                            | Alexander Dilthey; Andreas Walker; André Heimbach; Bärbel Lipcke; Carsten Tiemann; Dennis Deschka; Janine Silvery; Julia Fazaal; Jörg Timm; Kerstin Ludwig; Klaus Pfeffer; Malte Kohns Vasconcelos; Per Hoffmann; Tobias Wienemann; Torsten Houwaart                                                                                                                                                                                                                                                                                                                                                                                                                                                                                    |
| EPI_ISL_1936102, EPI_ISL_1936126, EPI_ISL_1936143, EPI_ISL_1936290                                                                                                                                                                                                                                                                                                                                                | Main Chemical Laboratories Egypt Army                                                                       | Main Chemical Laboratories Egypt Army                                                                                | Abdullah Salama; AbedElrahman Zekri; Ahmed Gad; Mervat Hassan; Mohamed Abdel-Monem; Mohamed El-Esawi; Mohamed Seadawy; Mohamed Shamel; Sabah Ahmed                                                                                                                                                                                                                                                                                                                                                                                                                                                                                                                                                                                      |
| EPI_ISL_2802787, EPI_ISL_3298801, EPI_ISL_3425484, EPI_ISL_3544425                                                                                                                                                                                                                                                                                                                                                | Maine Health and Environmental Testing Laboratory                                                           | Tewhey Lab, The Jackson Laboratory                                                                                   | Barter, M.; Dewey, H.; H. and Tewhey, R.; Iosue, F.; Lynch, R.; Matluk, N.; Munger                                                                                                                                                                                                                                                                                                                                                                                                                                                                                                                                                                                                                                                      |
| EPI_ISL_3251511                                                                                                                                                                                                                                                                                                                                                                                                   | MakLab Laboratorium Diagnostyczne                                                                           | Wojewodzka Stacja Sanitarno-Epidemiologiczna w Rzeszowie, Laboratorium Diagnostyki Medycznej                         | Anna Nowakowska; Karolina Ostrowska; Katarzyna Wilk; Marzena Baranowska                                                                                                                                                                                                                                                                                                                                                                                                                                                                                                                                                                                                                                                                 |
| EPI_ISL_2875418, EPI_ISL_3065067, EPI_ISL_3065179, EPI_ISL_3603785                                                                                                                                                                                                                                                                                                                                                | Mako Medical                                                                                                | Centers for Disease Control and Prevention Division of Viral Diseases, Pathogen Discovery                            | Adrian Paskey; Benjamin Rambo-Martin; Christopher Gulvick; Clinton Paden; Clinton R. Paden; Dakota Howard; Darlene Wagner; Dhvani Batra; Duncan MacCannell; Jason Caravas; Kara Moser; Lauren Moon; Matthew Schmeer; Matthew Tugwell; Peter Cook; Peter W. Cook; Scott Sammons; Shatavia Morrison; Yvette Unoaumili                                                                                                                                                                                                                                                                                                                                                                                                                     |
| EPI_ISL_3770668, EPI_ISL_3770672, EPI_ISL_3770673, EPI_ISL_3770679, EPI_ISL_3770687                                                                                                                                                                                                                                                                                                                               | Malawi Liverpool Wellcome Trust Clinical Research Program                                                   | Malawi Liverpool Wellcome Trust Clinical Research Program                                                            | Ben Morton; Catherine Ancombe; Kondwani Jambo; Philip Ashton; Sam Lissauer                                                                                                                                                                                                                                                                                                                                                                                                                                                                                                                                                                                                                                                              |
| EPI_ISL_1435808                                                                                                                                                                                                                                                                                                                                                                                                   | Malaysia Genome Institute                                                                                   | Malaysia Genome Institute                                                                                            | Azrin Ahmad; Enizza Kasim; Irm Suhayu Sopian; Mohd Faizal Abu Bakar; Mohd Noor Mat Isa; Nor Azfa Johari.; Nurhezreen Md Iqbal; Shamsidar Sopie; Siti Noraini Othman; Yusuf Muhammad Noor                                                                                                                                                                                                                                                                                                                                                                                                                                                                                                                                                |
| EPI_ISL_2464573                                                                                                                                                                                                                                                                                                                                                                                                   | Maryland Genomics, Institute for Genome Sciences, University of Maryland School of Medicine                 | Maryland Genomics, Institute for Genome Sciences, University of Maryland School of Medicine                          | Aditya; Claire M; Fraser; Holly; Humphrys; Jacques; Kranthi; Lisa D; Luke J; Mehta; Mike; Ott; Ravel; Roussey; Sadzewicz; Sandra; Tallon; Vavikolanu                                                                                                                                                                                                                                                                                                                                                                                                                                                                                                                                                                                    |
| EPI_ISL_3453891                                                                                                                                                                                                                                                                                                                                                                                                   | Maun Reference Hospital laboratory                                                                          | Botswana Harvard HIV Reference Laboratory                                                                            | Boitumelo J.L Zuze; Botshelo Radibe; Dorcas Maruapula; Joseph Makhema; Keoratile Ntshambiwa; Legodile Kooepile; Madisa Mine; Modisa Motswaledi; Mosepele Mosepele; Ontlametse T. Bareng; Roger Shapiro; Sandra Maripe; Shahin Lockman; Sikhulile Moyo; Simani Gaseitsiwe; Thongbotho Mphoyakgosi; Timothy Odilile Matsuoekwane; Wonderful T. Choga                                                                                                                                                                                                                                                                                                                                                                                      |
| EPI_ISL_456377                                                                                                                                                                                                                                                                                                                                                                                                    | MedLab Central Ltd                                                                                          | Institute of Environmental Science and Research (ESR)                                                                | Anja Werno; Antje van der Linden; Arlo Upton; Chris Mansell; David Hammer; Dragana Drinkovic; Erasmus Smit; Gary McAuliffe; Hana Sofia Andersson; James Ussher; Jill Sherwood; Joep de Ligt; Josh Freeman; Julia Howard; Juliet Elvy; Lauren Jelly; Mary DeAlmeida; Matt Blakiston; Matt Storey; Matthew Rogers; Max Bloomfield; Michael Addidle; Michelle Balm; Sally Roberts; Sarah Jefferies; Sharmini Muttaiyah; Susan Morpeth; Susan Taylor; Timothy Blackmore; Vani Sathyendran; Veronica Playle; Virginia Hope; Xiaoyun Ren                                                                                                                                                                                                      |
| EPI_ISL_482759, EPI_ISL_482769, EPI_ISL_1109624                                                                                                                                                                                                                                                                                                                                                                   | Medical Ain Shams Research Institute (MASRI), Ain Shams University                                          | Medical Ain Shams Research Institute (MASRI), Ain Shams University                                                   | Ahmad Moustafa; Ashraf Omar; Aya Mohamed; Fatma Ebied; Ghada Ismael; Hagar Elshora; Hala Hafez; Hesham Elghazaly; Hoda Ezz Elarab; Iman Foda; Mahmoud Elmetinni; Manal Hamdy Elsaid; Mohamed Elhadidi; Osama Mansour; Osama Mansour.; Reham Kassab; Reham Mamdoudh; Samia Abdou Girgis; Sara Elnakeep; Sara Hassan Agwa; Shaimaa Moustafa; Shimaa Moustafa                                                                                                                                                                                                                                                                                                                                                                              |
| EPI_ISL_2107525                                                                                                                                                                                                                                                                                                                                                                                                   | Medical Laboratory Sciences, Arab American University                                                       | Medical Laboratory Sciences, Arab American University                                                                | Al-Jawabreh, A.; Al-Jawabreh, H.; Dumaidi, K.; Ereqat, S.; Nasereddin, A.                                                                                                                                                                                                                                                                                                                                                                                                                                                                                                                                                                                                                                                               |
| EPI_ISL_2333359, EPI_ISL_2491386                                                                                                                                                                                                                                                                                                                                                                                  | Medical Microbiology Unit, Department for Laboratory Medicine, Drammen Hospital, Vestre Viken Health Trust, | Norwegian Institute of Public Health, Department of Virology                                                         | 'Kathrine Stene-Johansen; Atiya R Ali; Debech Nadia; Engebretsen Serina Beate; Garcia Llorente Ignacio; Hilde Elshaug; Hilde Vollan; Jon Bråte; Kamilla Heddeland Instefjord; Karoline Bragstad; Kathrine Stene-Johansen; Line Victoria Moen; Marie Paulsen Madsen; Olav Hungnes; Pedersen Benedikte Nevjen; Rasmus Riis Kopperud                                                                                                                                                                                                                                                                                                                                                                                                       |
| EPI_ISL_2124340                                                                                                                                                                                                                                                                                                                                                                                                   | Medizinisches Labor Ostsachsen MVZ GbR Nebenbetriebsstatte Dresden                                          | Robert Koch Institute                                                                                                |                                                                                                                                                                                                                                                                                                                                                                                                                                                                                                                                                                                                                                                                                                                                         |
| EPI_ISL_3186721, EPI_ISL_3281329, EPI_ISL_3833949                                                                                                                                                                                                                                                                                                                                                                 | Medlab Pathology                                                                                            | NSW Health Pathology - Institute of Clinical Pathology and Medical Research; Westmead Hospital; University of Sydney | Arnott A.; Draper J.; Gall M.; Martinez E.; Rockett R.; Sintchenko V.; on behalf of ICPMR                                                                                                                                                                                                                                                                                                                                                                                                                                                                                                                                                                                                                                               |
| EPI_ISL_1158089, EPI_ISL_3129820, EPI_ISL_3446578                                                                                                                                                                                                                                                                                                                                                                 | Michigan Department of Health and Human Services, Bureau of Laboratories                                    | Michigan Department of Health and Human Services, Bureau of Laboratories                                             | Blankenship HM; Riner D; Soehnlén MK                                                                                                                                                                                                                                                                                                                                                                                                                                                                                                                                                                                                                                                                                                    |
| EPI_ISL_2650294, EPI_ISL_3671104                                                                                                                                                                                                                                                                                                                                                                                  | Microbiologia CATLAB                                                                                        | Can Rutí SARS-CoV-2 Sequencing Hub (HUGTIP/IrsiCaixa/GTIP)                                                           | Alba Sánchez; Alexia Paris; Anna Not; Antoni E Bordoy; Bonaventura Clotet; Cristina Casañ; Cristina Esteban; David Panisello; Francesc Catala-Moll; Gemma Clara; Ignacio Blanco; Laia Soler; Lauro Sumoy; Marc Noguera-Julian; Maria Casadellà; Mariona Parera; Mercedes Guerrero; Montserrat Giménez; Pere-Joan Cardona; Pilar Armengol; Roger Paredes; Verónica Saludes; and Elisa Martró on behalf of the Can Rutí SARS-CoV-2 Sequencing Hub                                                                                                                                                                                                                                                                                         |
| EPI_ISL_519882, EPI_ISL_521906, EPI_ISL_562942, EPI_ISL_592743, EPI_ISL_962822, EPI_ISL_1033147, EPI_ISL_1250002, EPI_ISL_2379271, EPI_ISL_2379279, EPI_ISL_2379280, EPI_ISL_2379288, EPI_ISL_2405345, EPI_ISL_2405348, EPI_ISL_2405351, EPI_ISL_2482435, EPI_ISL_2482447, EPI_ISL_2482454, EPI_ISL_2839591, EPI_ISL_3050770, EPI_ISL_3050778, EPI_ISL_3050786, EPI_ISL_3050789, EPI_ISL_3050796, EPI_ISL_3050806 |                                                                                                             |                                                                                                                      |                                                                                                                                                                                                                                                                                                                                                                                                                                                                                                                                                                                                                                                                                                                                         |

|                                                                                                      |                                                                                                                                                                         |                                                                                                      |                                                                                                                                                                                                                                                                                                                                                                                                                                                                                                                                                                                                                                                           |
|------------------------------------------------------------------------------------------------------|-------------------------------------------------------------------------------------------------------------------------------------------------------------------------|------------------------------------------------------------------------------------------------------|-----------------------------------------------------------------------------------------------------------------------------------------------------------------------------------------------------------------------------------------------------------------------------------------------------------------------------------------------------------------------------------------------------------------------------------------------------------------------------------------------------------------------------------------------------------------------------------------------------------------------------------------------------------|
| see above                                                                                            | Microbiological Diagnostic Unit - Public Health Laboratory (MDU-PHL)                                                                                                    | MDU-PHL                                                                                              | M. B.; M.L.; N.L.; Sait; Sait, M.; Schultz; Schultz M.; Schultz M. B.; Seemann T.; Seemann, T.; Sherry; Sherry, N.                                                                                                                                                                                                                                                                                                                                                                                                                                                                                                                                        |
| EPI_ISL_2621569                                                                                      | Microbiological Diagnostic Unit - Public Health Laboratory (MDU-PHL)                                                                                                    | Microbiological Diagnostic Unit - Public Health Laboratory (MDU-PHL)                                 | M.L.; N.L.; Sait; Seemann T.; Sherry                                                                                                                                                                                                                                                                                                                                                                                                                                                                                                                                                                                                                      |
| EPI_ISL_427075                                                                                       | Microbiological Diagnostic Unit Public Health Laboratory                                                                                                                | Microbiological Diagnostic Unit Public Health Laboratory                                             | Sait, M.; Schultz M.; Seemann T.; Sherry, N.                                                                                                                                                                                                                                                                                                                                                                                                                                                                                                                                                                                                              |
| EPI_ISL_1372049                                                                                      | Microbiology Department , Late Shri Lakhiram Agrawal Memory Hospital & College, Raigarh, Chhattisgarh                                                                   | Institute of Life Sciences - INSACOG                                                                 | Ajay Parida; Amol M. Kanampalliwar; Arup Ghosh; Atimukta Jha; INSACOG Consortium; Punit Prasad; Rajeeb Swain; Rupesh Dash; Safal Walia; Shifu Aggarwal; Sunil K. Raghav                                                                                                                                                                                                                                                                                                                                                                                                                                                                                   |
| EPI_ISL_3156121, EPI_ISL_3817454                                                                     | Microbiology Department, Laboratori Clinic Metropolitana Nord. Hospital Universitari Germans Trias i Pujol                                                              | Can Ruti SARS-CoV-2 Sequencing Hub (HUGTIP/IrsiCaixa/IGTP)                                           | Alba Sánchez; Alexia París; Anna Not; Antoni E Bordoy; Bonaventura Clotet; Cristina Casañ; David Panisello; Francesc Catala-Moll; Gemma Clara; Ignacio Blanco; Laia Soler; Lauro Sumoy; Marc Noguera-Julian; Maria Casadellà; Mariona Parera; Mercedes Guerrero; Montserrat Giménez; Pere-Joan Cardona; Pilar Armengol; Roger Paredes; Verónica Saludes; and Elisa Martró on behalf of the Can Ruti SARS-CoV-2 Sequencing Hub                                                                                                                                                                                                                             |
| EPI_ISL_2312984, EPI_ISL_2508503                                                                     | Microbiology Division, SC DHEC                                                                                                                                          | Microbiology Division, SC DHEC                                                                       | Flores, H.; Freeman, J.                                                                                                                                                                                                                                                                                                                                                                                                                                                                                                                                                                                                                                   |
| EPI_ISL_447303                                                                                       | Microbiology Division, Barzilai University Medical Center                                                                                                               | Stern Lab                                                                                            | Stern Lab                                                                                                                                                                                                                                                                                                                                                                                                                                                                                                                                                                                                                                                 |
| EPI_ISL_3545554                                                                                      | Microbiology Laboratory, Attikon University Hospital, Athens                                                                                                            | Central National Laboratory ,Public Health Organization                                              | N.Siafakas; S.Pournaras et al                                                                                                                                                                                                                                                                                                                                                                                                                                                                                                                                                                                                                             |
| EPI_ISL_3525476                                                                                      | Microbiology, Russian Research Anti-plague Institute 'Microbe'                                                                                                          | Microbiology, Russian Research Anti-plague Institute 'Microbe'                                       | A.A.; A.D.; A.V.; E.A.; E.V.; Fedorov; Katyshev; Kazorina; Keita, M.; Keita, S.; Krasnov; Kritsky; Kutyrev; Naryshkina; S.A.; Shcherbakova; Sosodeda; V.V.; Y.M.                                                                                                                                                                                                                                                                                                                                                                                                                                                                                          |
| EPI_ISL_456256, EPI_ISL_548003, EPI_ISL_548145, EPI_ISL_1016844, see above                           | Middlemore Hospital                                                                                                                                                     | Institute of Environmental Science and Research (ESR)                                                | Anja Werno; Antje van der Linden; Arlo Upton; Chris Mansell; David Hammer; Dragana Drinkovic; Erasmus Smit; Gary McAuliffe; Hana Sofia Andersson; Hermes Perez; James Ussher; Jill Sherwood; Jing Wang; Joep de Ligt; Josh Freeman; Julia Howard; Juliet Elvy; Lauren Jelly; Mary DeAlmeida; Matt Blakiston; Matt Storey; Matthew Rogers; Max Bloomfield; Michael Addile; Michelle Balm; Muhammad Faisal; Nikki Freed; Olin Silander; Olivia Stroeven; Rachel Boyle; Sally Roberts; SallyAnn Harbison; Sarah Jefferies; Sharmini Muttiayah; Susan Morpeth; Susan Taylor; Timothy Blackmore; Vani Sathyendran; Veronica Playle; Virginia Hope; Xiaoyun Ren |
| EPI_ISL_3652187                                                                                      | Ministry Of Health - Central Labs                                                                                                                                       | Ministry Of Health - Central Labs                                                                    | Eyad Atwa; Mahmoud Al Gazo; Mustafa Abed Rabo; Suhaila Elyan                                                                                                                                                                                                                                                                                                                                                                                                                                                                                                                                                                                              |
| EPI_ISL_3650535                                                                                      | Ministry Of Health- labs                                                                                                                                                | Ministry Of Health- labs                                                                             | Eyad Atwa; Mahmoud Al Gazo; Suhaila Elyan                                                                                                                                                                                                                                                                                                                                                                                                                                                                                                                                                                                                                 |
| EPI_ISL_718215                                                                                       | Ministry of Health Hospitals                                                                                                                                            | Institute of Health and Community Medicine                                                           | Chan Chia Juli; Chua Hock Hin; David Perera; Ooi Mong How; Tonnil Sia Loong Loong; Wong Jyn Shan; Wong Kiing Aik                                                                                                                                                                                                                                                                                                                                                                                                                                                                                                                                          |
| EPI_ISL_2232666, EPI_ISL_2403271, EPI_ISL_2403272, EPI_ISL_3063334, see above                        | Ministry of Health Turkey                                                                                                                                               | Ministry of Health Turkey                                                                            | Fatma Bayrakdar; Gulay Korukluoglu; Gülay Korukluoğlu; Süleyman Yalcin; Süleyman Yalcin; Yasemin Cosgun; Yasemin Cosgun                                                                                                                                                                                                                                                                                                                                                                                                                                                                                                                                   |
| EPI_ISL_2604216                                                                                      | Ministry of Health, Jaber Al-Ahmad Hospital                                                                                                                             | Virology Unit, Department of Microbiology, Faculty of Medicine, Kuwait University                    | Anfal Al-Adwani; Ebaa Al-Awadhi; Hussain Safar; Nada Madi                                                                                                                                                                                                                                                                                                                                                                                                                                                                                                                                                                                                 |
| EPI_ISL_1712727, EPI_ISL_1713189, EPI_ISL_1713277, EPI_ISL_1713377, see above                        | Ministry of Public Health / Hamad Medical Corporation                                                                                                                   | Biomedical Research Center (BRC), Qatar University / Qatar Genome Project (QGP)                      | Asmaa A. Al-Thani. MOPH and HMC: Abdullatif Al-Khal; Asmaa A. Al-Thani. MOPH and HMC: Abdullatif Al-Khal; BRC: Fatiha M. Benslimane; Chad: Saad; Dana Al-Batesh; Dina Elgakhlab QGP: Fatima H. Al-Kuwari; Dina Elgakhlab QGP: Fatima H. Al-Kuwari; Einas A. E. Al-Kuwari; Hadi M. Yassine; Hamad E. Al-Romaihi; Hamda Alromaihi; Heba A. Al-Khatib; Mashael A. Al-Bader; Mohammed Al-Thani; Muna A. S. Al-Maslamani; Oal Al-Jamal; Peter V. Coyle; Reham A. El-Kahlout. QBB: Tasneem Al-Hamad; Reham A. El-Kahlout. QBB: Tasneem Al-Hamad; Roberto Bertollini; Salih Al-Marri                                                                             |
| EPI_ISL_1714088, EPI_ISL_1714410, EPI_ISL_1714509, EPI_ISL_1714737                                   | Ministry of Public Health / Hamad Medical Corporation                                                                                                                   | Weill Cornell Medical College - Qatar (WCM-Q), Genomics Core Laboratory / Qatar Genome Project (QGP) | Chadi Saad MOPH and HMC: Abdullatif Al-Khal; Dina Elgakhlab; Einas A. E. Al-Kuwari; Hamad E. Al-Romaihi; Hamda Alromaihi; Joel A Malek. QGP: Fatima H. Al-Kuwari; Laith Abu-Raddad; Mashael A. Al-Bader; Meryem Bensaad; Mohammed Al-Thani; Muna A. S. Al-Maslamani; Peter V. Coyle; Reham A. El-Kahlout. QBB: Tasneem Al-Hamad; Roberto Bertollini; Salih Al-Marri; Shameem Younsunjunj; WCMQ: Ayeda A. Ahmed; Yasmin Mohamoud                                                                                                                                                                                                                           |
| EPI_ISL_450768                                                                                       | Minnesota Department of Health, Public Health Laboratory                                                                                                                | Minnesota Department of Health, Public Health Laboratory                                             | Jacob Garfin; Matt Plumb; and Xiong Wang                                                                                                                                                                                                                                                                                                                                                                                                                                                                                                                                                                                                                  |
| EPI_ISL_1706286, EPI_ISL_2304205, EPI_ISL_3161244, EPI_ISL_3503750                                   | Missouri State Public Health Laboratory                                                                                                                                 | Missouri State Public Health Laboratory                                                              | Ashley New; Joshua Barry; Matthew Sinn                                                                                                                                                                                                                                                                                                                                                                                                                                                                                                                                                                                                                    |
| EPI_ISL_2958895                                                                                      | Mobile County Health Department                                                                                                                                         | Synergy Laboratories                                                                                 | Megan Cornwell                                                                                                                                                                                                                                                                                                                                                                                                                                                                                                                                                                                                                                            |
| EPI_ISL_520735, EPI_ISL_520738                                                                       | Mohammed Bin Rashid University of Medicine and Health Sciences                                                                                                          | Al Jalila Genomics Center                                                                            | Abdulmajeed Alkhaib; Abiola Catherine Senok; Ahmad Abou Tayoun; Alawi Alsheikh-Ali; Divinlal Harilal; Hamda Khansaheb; Hanan Al Suwaidi; Mohammed Uddin; Norbert Nowotny; Qutayba Hamid; Rabih Halwani; Rifat Hamoudi; Rupa Murthy Varghese; Sathishkumar Ramaswamy; Tom Loney; Zulfa Omar Deesi                                                                                                                                                                                                                                                                                                                                                          |
| EPI_ISL_2102066, see above                                                                           | Molecular Diagnostics Pathology Department Mater Dei Hospital Malta                                                                                                     | Molecular Diagnostics Pathology Department Mater Dei Hospital Malta                                  | C Cilia; G Zahra; L Grech; M Briffa; R Borg                                                                                                                                                                                                                                                                                                                                                                                                                                                                                                                                                                                                               |
| EPI_ISL_3255988, EPI_ISL_3256005, EPI_ISL_3256006, EPI_ISL_3314957                                   | Molecular Diagnostics Laboratory                                                                                                                                        | National Reference Laboratory, Nigeria Centre for Disease Control                                    | Anthony Ahumibe; Catherine Okoi; Celestina Obiekea; Chimaobi Chukwu; Dr Chikwe Ihekweazu; Dr Ndodo Nnaemeka; Dr Omoare Adesuyi; Nwando Mba; Olusola Anuoluwapo Akanbi                                                                                                                                                                                                                                                                                                                                                                                                                                                                                     |
| EPI_ISL_467446                                                                                       | Molecular Diagnostics Services (MDS)                                                                                                                                    | KRISP, KZN Research Innovation and Sequencing Platform                                               | Chimukangara B; Giandhari J; Khan S; Lessells R; Mdlalose K; Pillay S; Tegally H; Wilkinson E; York D; de Oliveira T                                                                                                                                                                                                                                                                                                                                                                                                                                                                                                                                      |
| EPI_ISL_2626398, EPI_ISL_2626399, EPI_ISL_2626429, EPI_ISL_3101330                                   | Molecular diagnostic laboratory of Federal Research Institute of Epidemiology" of The Federal Service on Customers' Rights Protection and Human Well-being Surveillance | Group of Genomics and Postgenomic Technologies of Central Research Institute of Epidemiology         | Akimkin V.G.; Berlina Y.Y.; Bulanenko V.P.; Cherkashina A.S.; Dohoyan A.Y.; Golubeva A.G.; Kaptelova V.V.; Kondrasheva L.Y.; Korneenko E.V.; Nadтока M.I.; Saenko S.S.; Samoilov A.E.; Shipulina O.Y.; Sinitsyn S.O.; Smirnova Y.S.; Solovieva E.D.; Speranskaya A.S.; Tivanova E.V.; Valdohina A.V.; Zotova M.I.; Zuev S.N.                                                                                                                                                                                                                                                                                                                              |
| EPI_ISL_1367677, EPI_ISL_1367692, EPI_ISL_1663669, EPI_ISL_3536601, EPI_ISL_3536603, EPI_ISL_3536604 | Molecular diagnostic unit for viral haemorrhagic fevers and emerging viruses, Bouaké CHU Laboratory                                                                     | Molecular diagnostic unit for viral haemorrhagic fevers and emerging viruses, Bouaké CHU Laboratory  | Adjaratou Traoré; Bamba Fatoumata Touré; Chantal Akoua-Koffi; Coulibaly Mbegnang; Diané Bamourou; Essia Belarbi; Etilé Anoh; Fabian Leendertz; Grit Schubert; Kra Ouffoué; Monemo Pacome; Oby Wayoro; Safiatou Karidioula; Soundélé Maité                                                                                                                                                                                                                                                                                                                                                                                                                 |
| EPI_ISL_614349, EPI_ISL_614353, EPI_ISL_614354                                                       | Molecular diagnostic unit for viral haemorrhagic fevers and emerging viruses, Bouaké CHU Laboratory                                                                     | Project group Epidemiology of Highly Pathogenic Microorganisms, Robert Koch-Institute                | Adjaratou Traoré; Bamba Fatoumata Touré; Chantal Akoua-Koffi; Coulibaly Mbegnang; Diané Bamourou; Essia Belarbi; Etilé Anoh; Fabian Leendertz; Grit Schubert; Kra Ouffoué; Monemo Pacome; Safiatou Karidioula; Soundélé Maité                                                                                                                                                                                                                                                                                                                                                                                                                             |
| EPI_ISL_2533902, EPI_ISL_2710343, EPI_ISL_3133157                                                    | Montana Public Health Laboratory                                                                                                                                        | Montana Public Health Laboratory                                                                     | Carrie Biskupiak; Deborah Gibson; Joy Ritter; Michael Dills; Michelle Mozor                                                                                                                                                                                                                                                                                                                                                                                                                                                                                                                                                                               |
| EPI_ISL_2688379, EPI_ISL_3493027, EPI_ISL_3493068                                                    | Multiplex DX                                                                                                                                                            | Multiplex DX                                                                                         | Diana Drobna; Jakub Kovac; Pavol Cekan; Silvia Rybecka; Veronika Mancikova                                                                                                                                                                                                                                                                                                                                                                                                                                                                                                                                                                                |
| EPI_ISL_3007818                                                                                      | N. A. Semashko Republican Clinical Hospital                                                                                                                             | WHO National Influenza Centre Russian Federation                                                     | Andrey Komissarov; Artem Fadeev; Daria Danilenko; Dmitry Lioznov; Elena Nabieva; Georgii Bazykin; Kirill Varchenko; Ksenia Safina; Kseniya Komissarova; Maria Pisareva; Mikhail Bakaev; Nikita Yolshin; Oula Mansour; Tamila Musaeva; Veronika Eder                                                                                                                                                                                                                                                                                                                                                                                                       |
| EPI_ISL_2816309, EPI_ISL_3086695                                                                     | N.F. Gamaleya Research Center for Epidemiology and Microbiology                                                                                                         | WHO National Influenza Centre Russian Federation                                                     | Alexander Gintsburg; Alexey Shchetinin; Alina Odintsova; Andrei Botikov; Andrei Pochtovyi; Andrei Siniavin; Andrey Komissarov; Anna Kovyrshina; Artem Fadeev; Artem Tkachuk; Daria Danilenko; Denis Kleymenov; Denis Logunov; Dmitry Lioznov; Dmitry Shcheblyakov; Elena Mazunina; Elena Nabieva; Elena Shidlovskaya; Elizaveta Divisenko; Evgeniia Bykonja; Georgii Bazykin; Inna Dolzhikova; Kirill Varchenko; Ksenia Safina; Kseniya Komissarova; Liubov Popova; Ludmila Vasilenchenko; Maria Nikiforova; Maria Pisareva; Mikhail Bakaev; Nadezhda Kuznetsova; Nikita Yolshin; Oula Mansour; Tamila Musaeva; Veronika Eder; Vladimir Gushchin          |
| EPI_ISL_3334211                                                                                      | NB-Hôpital Georges L. Dumont                                                                                                                                            | New Brunswick - Vitalité Health Network                                                              | Allain E.; Chacko S.; Crapeault N.; Desnoyers G.; Garceau R.; Lacroix J.; Lyons P.; Shaw W.                                                                                                                                                                                                                                                                                                                                                                                                                                                                                                                                                               |
| EPI_ISL_605918, EPI_ISL_605922                                                                       | NGS Lab, DNA SOLUTION LTD.                                                                                                                                              | NGS Lab, DNA SOLUTION LTD.                                                                           | Chowdhury, M.; H.U.; Haider; Hasan; Hosen; K.N.; Khaleque, A.; Khan; Khan, M.; M.B.; M.F.A.; M.H.; M.I.; Rabbi; Rahman, M.; Razu; Sufian, A.                                                                                                                                                                                                                                                                                                                                                                                                                                                                                                              |
| EPI_ISL_3132538                                                                                      | NHLS Charlotte Maxeke Johannesburg Academic Hospital and the University of the Witwatersrand                                                                            | KRISP, KZn Research Innovation and Sequencing Platform                                               | Bulelani Manene; Florette Treurnicht; Giandhari Jennifer; Kathleen Subramoney; Naidoo Yeshee; Pillay Sureshee; San James; Tegally Houriiyah; Tshabulla Derek; Wilkinson Eduan; Yajna Ramphal; de Oliveira Tulio                                                                                                                                                                                                                                                                                                                                                                                                                                           |
| EPI_ISL_2162339, EPI_ISL_3746809                                                                     | NHLS Universitas Academic                                                                                                                                               | UFS Virology                                                                                         | D Goedhals; Emmanuel Ogunbayo; MM Nyaga; MT Mogotsi; P Nthiga; PA Bester; T de Oliveira                                                                                                                                                                                                                                                                                                                                                                                                                                                                                                                                                                   |
| EPI_ISL_467509                                                                                       | NHLS-IALCH                                                                                                                                                              | KRISP, KZN Research Innovation and Sequencing Platform                                               | Chimukangara B; Giandhari J; Khan S; Lessells R; Mdlalose K; Pillay S; Tegally H; Wilkinson E; York D; de Oliveira T                                                                                                                                                                                                                                                                                                                                                                                                                                                                                                                                      |

|                                                                                                                                                                                                                                                                                                                  |                                                                                                                         |                                                                                                                                                                         |                                                                                                                                                                                                                                                                                                                                                                                                                                                                                                                                                           |
|------------------------------------------------------------------------------------------------------------------------------------------------------------------------------------------------------------------------------------------------------------------------------------------------------------------|-------------------------------------------------------------------------------------------------------------------------|-------------------------------------------------------------------------------------------------------------------------------------------------------------------------|-----------------------------------------------------------------------------------------------------------------------------------------------------------------------------------------------------------------------------------------------------------------------------------------------------------------------------------------------------------------------------------------------------------------------------------------------------------------------------------------------------------------------------------------------------------|
| EPI_ISL_2693055                                                                                                                                                                                                                                                                                                  | NHLS_VIRO                                                                                                               | KRISP, KZN Research Innovation and Sequencing Platform                                                                                                                  | Giandhari Jennifer; Naidoo Yeshnee; Pillay Sureshnee; San James; Tegally Houriyah; Tshabuila Derek; Wilkinson Eduan; Yajna Ramphal; de Oliveira Tulio                                                                                                                                                                                                                                                                                                                                                                                                     |
| EPI_ISL_2693891, EPI_ISL_3275369                                                                                                                                                                                                                                                                                 | NHLS_VIRO Eastern Cape                                                                                                  | KRISP, KZN Research Innovation and Sequencing Platform                                                                                                                  | Giandhari Jennifer; Laguda-Akingba O; Naidoo Yeshnee; Pillay Sureshnee; San James; Tegally Houriyah; Tshabuila Derek; Wilkinson Eduan; Yajna Ramphal; de Oliveira Tulio                                                                                                                                                                                                                                                                                                                                                                                   |
| EPI_ISL_420037                                                                                                                                                                                                                                                                                                   | NIC Viral Respiratory Unit - Institut Pasteur of Algeria                                                                | National Reference Center for Viruses of Respiratory Infections, Institut Pasteur, Paris                                                                                | Angela Brisebarre; Etienne Simon-Lorière; Fawzi Derrar; Flora Donati; Marion Barbet; Maud Vanpeene; Mélanie Albert; Méline Bizard; Sylvie Behillili; Sylvie van der Werf; Vincent Enouf                                                                                                                                                                                                                                                                                                                                                                   |
| EPI_ISL_3161806, EPI_ISL_3161807, EPI_ISL_3161808, EPI_ISL_3161809, EPI_ISL_3375624, EPI_ISL_3375625, EPI_ISL_3375628, EPI_ISL_3375630, EPI_ISL_3375633, EPI_ISL_3375634                                                                                                                                         | NIC, Viral Respiratory Unit                                                                                             | Virology Departement                                                                                                                                                    | Aicha Bensalem; Aissam Hachid; Alia Grad; Amel Benyahia; Fawzi Derrar; Fayeze Ahmed Khardine; Fayeze Khardine; Fetoumaoudou; Mohamed Amine Beloufa; Nardjes Hihl                                                                                                                                                                                                                                                                                                                                                                                          |
| EPI_ISL_2968090                                                                                                                                                                                                                                                                                                  | NILMRC                                                                                                                  | Genomic Research Laboratory, Bangabandhu Sheikh Mujib Medical University                                                                                                | Arifa Akram; Laila Anjumam Banu; Md.Saydur Rahman; Md.Sharfuiddin Ahmed; Sharadindu Kanti Sinha                                                                                                                                                                                                                                                                                                                                                                                                                                                           |
| EPI_ISL_2484594, EPI_ISL_2484598, EPI_ISL_3150970                                                                                                                                                                                                                                                                | NL-Dr. Leonard A. Miller Centre for Health Services                                                                     | National Microbiology Laboratory (NML)                                                                                                                                  | Adel Malek; Anna Majer; Anneliese Landgraff; CanCOGeN's metadata curation team; Darian Hole; Elsie Grudeski; Gary Van Domselaar; George Zahariadis; Grace Seo; Jennifer Tanner; Kerri Smith; Kirsten Biggar; Laura Gilbert; Madison Chapel; Morag Graham; Natalie Knox; Nathalie Bastien; Philip Mabon; Public Health Agency of Canada CanCOGeN team; Rhannon Huzarewich; Robert Needle; Russell Mandes; Shari Tyson; Timothy Booth; Yan Li; Yang Yu                                                                                                      |
| EPI_ISL_422390, EPI_ISL_422402                                                                                                                                                                                                                                                                                   | NMIMR, Department of Virology                                                                                           | WACCBIP, University of Ghana                                                                                                                                            | Abraham Kwabena Anang; Augustina Arjarquah; Bright Adu; Collins M. Morang'a; Dominic S. Y. Amuzu; Erasmus Kotey; Evelyn Bonney; Fred Tel-Maya; George B. Kyei; Gordon A. Awandare; Ivy Asante; Joyce M. Ngoi; Kofi Bonney; Linda Boatemaa; Miriam Eshun; Peter Quashie; Selassie Kumordji; Vanessa Magnussen; William Ampofo                                                                                                                                                                                                                              |
| EPI_ISL_2835584, EPI_ISL_3399714, EPI_ISL_3399759                                                                                                                                                                                                                                                                | NS-QEII Health Sciences Centre                                                                                          | National Microbiology Laboratory (NML)                                                                                                                                  | Anna Majer; Anneliese Landgraff; CanCOGeN's metadata curation team; Dan Gaston; Darian Hole; Elsie Grudeski; Gary Van Domselaar; Grace Seo; Janice Pettipas; Jason LeBlanc; Jennifer Tanner; Kirsten Biggar; Madison Chapel; Morag Graham; Natalie Knox; Nathali; Nathalie Bastien; Philip Mabon; Public Health Agency of Canada CanCOGeN team; Rhannon Huzarewich; Russell Mandes; Shari Tyson; Timothy Booth; Todd Hatchedette; Yan Li                                                                                                                  |
| EPI_ISL_1626499, EPI_ISL_632312                                                                                                                                                                                                                                                                                  | NSTU COVID-19 Diagnostic Center NU-sjukvården                                                                           | NSU Genome Research Institute (NGRI)                                                                                                                                    | Abdul Khaleque; Abdus Sadique; Aura Rahman; Firoz Ahmed; Hasan Mahmud Reza; Kazi Nadim Hasan; Maqsd Hossain; Md. Aminul Islam; Mohammad Salim Hossain; Newaz Mohammed Bahadur; Syeda Naushin Tabassum; Tahrira Saiha Huq                                                                                                                                                                                                                                                                                                                                  |
| EPI_ISL_2274679                                                                                                                                                                                                                                                                                                  | NYC Pandemic Response Lab                                                                                               | Clinical microbiology, Sahlgrenska University Hospital Wadsworth Center, New York State Department of Health                                                            | Hedvig Engström Jakobsson; Johan Ringlander; Josefin Olsson; Magnus Lindh                                                                                                                                                                                                                                                                                                                                                                                                                                                                                 |
| EPI_ISL_2509496, EPI_ISL_2614811                                                                                                                                                                                                                                                                                 | Nacionalinis maisto ir veterinarijos rizikos vertinimo institutas                                                       | National Public Health Surveillance Laboratory                                                                                                                          | Alexis Russell; Catharine Prussing; Daryl M. Lamson; Erasmus Schneider; Erica Lasek-Nesselquist; John Kelly; Jonathan Pitnick; Kirsten St. George; Matthew Shudt; Melissa A Leisner; Navjot Singh                                                                                                                                                                                                                                                                                                                                                         |
| EPI_ISL_2798962                                                                                                                                                                                                                                                                                                  | Nacionālās medicīnas serviss - laboratorija, SIA                                                                        | Riga East University Hospital, National Microbiology Reference Laboratory, Eurofins Genomics Europe Sequencing GmbH                                                     | Ana Steponkiene; Danas Baksa; Jelena Razumk; Lukas Vasionis; Lukas Zemaitis; Migle Gabrielaite; Svajune Muralyte                                                                                                                                                                                                                                                                                                                                                                                                                                          |
| EPI_ISL_3061301, EPI_ISL_3401987                                                                                                                                                                                                                                                                                 | Nastavni zavod za javno zdravstvo Primorsko-Goranske Zupanije                                                           | Hrvatski zavod za javno zdravstvo                                                                                                                                       | Arzu Algulieva; Diāna Dušacka; Dārta Pūpola; Ilva Pole; Inita Balta; Jevgenijs Bodrenko; Jūlija Čevere; NataĶa Mikena; Reinis Vangravs; Reinis Zeltmatis; Sergejs Ņikišins; Ģirts Šķenders                                                                                                                                                                                                                                                                                                                                                                |
| EPI_ISL_2532603                                                                                                                                                                                                                                                                                                  | Natona Laboratory of Health, Environment and Food                                                                       | Department of Public Health Microbiology Ljubljana, National Laboratory for Health, Environment and Food                                                                | Irena Tabain; Ivana Ferenčak                                                                                                                                                                                                                                                                                                                                                                                                                                                                                                                              |
| EPI_ISL_3064702, EPI_ISL_3064707, EPI_ISL_3064708, EPI_ISL_3064709                                                                                                                                                                                                                                               | National Agency for Public Health, Republic of Moldov                                                                   | Charité Universitätsmedizin Berlin, Institut für Virologie                                                                                                              | José Gonçalves; Katarina Proscenc; Marija Trkov; Martin Bosilj; Metka Paragi; Natasa Berginc; Tom Koritnik; Verica Mioč                                                                                                                                                                                                                                                                                                                                                                                                                                   |
| EPI_ISL_2894995, EPI_ISL_2894996                                                                                                                                                                                                                                                                                 | National Agency for Public Health, Republic of Moldova                                                                  | Charité Universitätsmedizin Berlin, Institut für Virologie                                                                                                              | Ala Halacu; Barbara Mühlemann; Christian Drostens; Julia Schneider; Jörn Beheim-Schwarzbach; Mariana Apostol; Talitha Veith; Terry Jones; Victor M Corman                                                                                                                                                                                                                                                                                                                                                                                                 |
| EPI_ISL_1805651, EPI_ISL_1805740, EPI_ISL_1805957                                                                                                                                                                                                                                                                | National Center for Communicable Diseases (NCCD) National Influenza Center                                              | National Center for Communicable Diseases (NCCD) National Influenza Center                                                                                              | Ala Halacu; Barbara Mühlemann; Christian Drostens; Julia Schneider; Julia Tesch; Jörn Beheim-Schwarzbach; Mariana Apostol; Talitha Veith; Terry Jones; Tobias Bleicker; Victor M Corman                                                                                                                                                                                                                                                                                                                                                                   |
| EPI_ISL_1805697                                                                                                                                                                                                                                                                                                  | National Center for Communicable Diseases (NCCD) National Influenza Center                                              | National Centre for Disease Control (NCDC) National Influenza Center                                                                                                    | Ankhhbayar S; Battur L; Bayasgalan N; Darmaa B; Hideka M; Khishigmunkh Ch; Mina N; Naranzul Ts; Nymadawa P; Seiichiro F; Shinji W; Tsozolmaa G                                                                                                                                                                                                                                                                                                                                                                                                            |
| EPI_ISL_1231756                                                                                                                                                                                                                                                                                                  | National Center for Infectious and Parasitic Diseases (NCIPD)                                                           | National Center for Infectious and Parasitic Diseases (NCIPD)                                                                                                           | Ankhhbayar S; Battur L; Bayasgalan N; Darmaa B; Hideka M; Khishigmunkh Ch; Mina N; Naranzul Ts; Nymadawa P; Seiichiro F; Shinji W; Tsozolmaa G                                                                                                                                                                                                                                                                                                                                                                                                            |
| EPI_ISL_1718284, EPI_ISL_1718304                                                                                                                                                                                                                                                                                 | National Center of Disease Control and Prevention of the Republic of Armenia                                            | National Center for Infectious and Parasitic Diseases (NCIPD)                                                                                                           | Alexiev et al                                                                                                                                                                                                                                                                                                                                                                                                                                                                                                                                             |
| EPI_ISL_1854612, EPI_ISL_1854640                                                                                                                                                                                                                                                                                 | National Center of Disease Control and Prevention of the Republic of Armenia                                            | Institute of Molecular Biology NAS RA, Republic of Armenia, Department of Bioengineering, Bioinformatics Institute and Molecular Biology IBMPH RAU, Republic of Armenia | Andranik Chavushyan; Arsen Arakelyan; Diana Avetyan; Gayane Melik-Pashayan; Gisane Khachatyan; Hovsep Ghazaryan; Maria Nikoghosyan; Nelli Muradyan; Roksana Zakharyan; Shushan Sargsryan; Siras Hakobyan; Tamara Sirunyan                                                                                                                                                                                                                                                                                                                                 |
| EPI_ISL_3543605, EPI_ISL_3543614, EPI_ISL_3543616, EPI_ISL_3543629, EPI_ISL_3543635, EPI_ISL_3543638                                                                                                                                                                                                             | National Center of Disease Control and Prevention of the Republic of Armenia, Davidyants Laboratories, Yerevan, Armenia | Institute of Molecular Biology NAS RA, Republic of Armenia, Department of Bioengineering, Bioinformatics Institute and Molecular Biology IBMPH RAU, Republic of Armenia | Alexander Greninger; Anahit Hovhannissyan; Andranik Chavushyan; Anna Khazaryan; Arsen Arakelyan; Diana Avetyan; Gisane Khachatyan; Hong Xie; Hovsep Ghazaryan; Keith R. Jerome; Lasata Shrestha; Lyudmila Niazyan; Maria Nikoghosyan; Meeli-Li Huang; Michelle Lin; Nelli Muradyan; Pavitra Roychoudhury; Roksana Zakharyan; Shah Mohamed Bakhash; Siras Hakobyan; Tamara Sirunyan                                                                                                                                                                        |
| EPI_ISL_1301994, EPI_ISL_2081910, EPI_ISL_2180157, EPI_ISL_2621388, EPI_ISL_2621411, EPI_ISL_2621413, EPI_ISL_2648093, EPI_ISL_2772530, EPI_ISL_2841895, EPI_ISL_2841915, EPI_ISL_2841970, EPI_ISL_3076736, EPI_ISL_3076750, EPI_ISL_3543052, EPI_ISL_3796095, EPI_ISL_3796647, EPI_ISL_3796723, EPI_ISL_3796741 | National Center of Infectious and Parasitic Diseases                                                                    | National Center of Infectious and Parasitic Diseases                                                                                                                    | Andranik Chavushyan; Ani Melkonyan; Arsen Arakelyan; Diana Avetyan; Gayane Melik-Pashayan; Gisane Khachatyan; Hovsep Ghazaryan; Lilil Ghukasyan; Maria Nikoghosyan; Nelli Muradyan; Roksana Zakharyan; Shushan Sargsryan; Siras Hakobyan; Tamara Sirunyan                                                                                                                                                                                                                                                                                                 |
| EPI_ISL_2897683, EPI_ISL_2106789, EPI_ISL_2106934                                                                                                                                                                                                                                                                | National Centre for Cell Science                                                                                        | CDFD                                                                                                                                                                    | Alexiev; Alexiev et al; Dimitrova; Dobrinov; Donchev; Grigorova I.; Grigorova L.; Hristova; Ivanov; Kantardjiev; Korsun; Philipova; Stoitsova; Stoykov; Trifonova                                                                                                                                                                                                                                                                                                                                                                                         |
| EPI_ISL_466850, EPI_ISL_528616                                                                                                                                                                                                                                                                                   | National Centre for Disease Control                                                                                     | CDFD-INSACOG                                                                                                                                                            | Ashwin Dalal; Asmita Gupta; Divya Vashisht; Murali Bashyam; Reelina Basu; Vinay Donipadi                                                                                                                                                                                                                                                                                                                                                                                                                                                                  |
| EPI_ISL_466850, EPI_ISL_528616                                                                                                                                                                                                                                                                                   | National Genomics Core-Center for DNA Fingerprinting and Diagnostics                                                    | National Genomics Core- Center for DNA Fingerprinting and Diagnostics (NGC-CDFD)- DBT's PAN-INDIA-1000 Genome consortium                                                | Ashwin Dalal; Asmita Gupta; Divya Vashisht; Murali Bashyam; Pratyusha Bala; Vinay Donipadi                                                                                                                                                                                                                                                                                                                                                                                                                                                                |
| EPI_ISL_3663497, EPI_ISL_3730332, EPI_ISL_3730344, EPI_ISL_3730377, EPI_ISL_3730379                                                                                                                                                                                                                              | National HIV Reference Laboratory, Ministry of Health, Public Health Institute of Malawi                                | CERI, Centre for Epidemic Response and Innovation, Stellenbosch University and KRISP, KZN Research Innovation and Sequencing Platform, UKZN.                            | Ashwin Dalal; Amrita Bhattacharjee; Arijta Jaiswal; Arpita Singh; Ashwin Dalal; Bala Pratyusha; DEBASHIS MITRA; DIVYA VASHISHT; Debashish Mitra; Devanshi Gupta; Divya Vashisht; G Shashikanth; Heena Shah; J. Mallikarjun; K. Viswakalyan; K.Manohar; Kaisar Ahmad Lone; Kaushika Kumar Malik; MURALI DHARAN BASHYAM; Madhumohan Rao; Murali Dharan Bashyam; N. Sudheer; Neeraj Kumar; R HARINARAYANAN; R HARINARAYANAN; RASHNA BHANDARI; Rashna Bhandari; Romila Moirangthem; SPR Prasad; Sanjana Sarkar; Shivani Yadav; Vinay Donipadi; Yogesh Patidar |
| EPI_ISL_1407115, EPI_ISL_2494782, EPI_ISL_2494830, EPI_ISL_2494924, EPI_ISL_2494966, EPI_ISL_2494972, EPI_ISL_2609595                                                                                                                                                                                            | National HIV Reference Laboratory, Ministry of Health, Public Health Institute of Malawi                                | CERI, Centre for Epidemic Response and Innovation, Stellenbosch University and KRISP, KZN Research Innovation and Sequencing Platform, UKZN.                            | Auld A; Chilima B; Chiwaula M; Emmanuel SJ; Giandhari J; Kaba M; Kampira E; Kasambara W; Kim L; Lessells R; Maida A; Mvula B; Mwangomba W; Naidoo Y; Panja L; Pillay S; Tegally H; Tshiabuila Derek; Wadonda N; Wilkinson E; de Oliveira T                                                                                                                                                                                                                                                                                                                |
| EPI_ISL_3663621, EPI_ISL_3663623, EPI_ISL_3663631, EPI_ISL_3663632, EPI_ISL_3663642, EPI_ISL_3663661, EPI_ISL_3663671                                                                                                                                                                                            | National HIV Reference Laboratory, Ministry of Health, Public Health Institute of Malawi                                | KRISP, KZN Research Innovation and Sequencing Platform                                                                                                                  | Auld A; Chilima B; Chiwaula M; Emmanuel SJ; Giandhari J; Kaba M; Kampira E; Kasambara W; Kim L; Lessells R; Maida A; Mvula B; Mwangomba W; Naidoo Y; Panja L; Pillay S; Tegally H; Tshiabuila Derek; Wadonda N; Wilkinson E; de Oliveira T                                                                                                                                                                                                                                                                                                                |
| EPI_ISL_1677732                                                                                                                                                                                                                                                                                                  | National Health Laboratory                                                                                              | Botswana Institute for Technology Research and Innovation                                                                                                               | Auld A; Chilima B; Chiwaula M; Emmanuel SJ; Giandhari J; Kaba M; Kampira E; Kasambara W; Kim L; Lessells R; Maida A; Mvula B; Mwangomba W; Naidoo Y; Panja L; Pillay S; Tegally H; Tshiabuila Derek; Wadonda N; Wilkinson E; de Oliveira T                                                                                                                                                                                                                                                                                                                |
| EPI_ISL_3799050                                                                                                                                                                                                                                                                                                  | National Health Laboratory Service, South Africa                                                                        | KRISP, KZN Research Innovation and Sequencing Platform                                                                                                                  | Dineo Emang Tshiamo. Tefelo Thela; Gape Nyepesti; Kefentse Arnold Tumed; Madisa Mine; Matshwarelo Ignatius Matsheka; Malebogo Kebabonye; Thongbotho Mphoyakgosi                                                                                                                                                                                                                                                                                                                                                                                           |
| EPI_ISL_456600                                                                                                                                                                                                                                                                                                   | National Health Laboratory, Timor-Leste                                                                                 | Microbiological Diagnostic Unit Public Health Laboratory, The Peter Doherty Institute for Infection and Immunity                                                        | Emmanuel S; Giandhari J; Naidoo Yeshnee; Pillay S; Tegally H; Tshabuila Derek; Wilkinson E; Yajna Ramphal; de Oliveira T                                                                                                                                                                                                                                                                                                                                                                                                                                  |
| EPI_ISL_2161032                                                                                                                                                                                                                                                                                                  | National Hematology and Transfusiology Center                                                                           | National Hematology and Transfusiology Center                                                                                                                           | Antonia da Costa, E.; Baird, R.; Barreto, I.; Caly, L.; Canisia, D.; Dakh, F.; Dolores de Jesus da Costa, M.; Douglas, N.; Francis, J.; Freeman, K.; Jayanti Pereira Tilman, A.; Marr, I.; Salt, M.; Salles de Sousa, A.; Schultz, M.; Seemann, T.; Sherry, N.; Soares da Silva, E.; Wapling, J.; Ximenes, J.                                                                                                                                                                                                                                             |
| EPI_ISL_2455484, EPI_ISL_2455498, EPI_ISL_2455504, EPI_ISL_2455506, EPI_ISL_2458057                                                                                                                                                                                                                              | National Hospital for Tropical Diseases                                                                                 | Oxford University Clinical Research Unit, Hanoi, Vietnam                                                                                                                | Aghayev AR                                                                                                                                                                                                                                                                                                                                                                                                                                                                                                                                                |
| EPI_ISL_959282, EPI_ISL_959283                                                                                                                                                                                                                                                                                   | National Influenza Center, Virology Department                                                                          | National Influenza Center                                                                                                                                               | H.Rogier van Doorn on behalf of the OUCRU COVID-19 research group; Le Van Duyet; Nguyen Thi Hong Thuong; Nguyen Thi Kim Chi; Nguyen Thi Tam; Nguyen Thu Trang; Pham Ngoc Thach; Phan Manh Cuong; Thomas Kesteman; Van Dinh Trang                                                                                                                                                                                                                                                                                                                          |
|                                                                                                                                                                                                                                                                                                                  |                                                                                                                         |                                                                                                                                                                         | A Nejati; F Ajaminejad; J Yavarian; K Sadeghi; N Ghavvami and T Mokhtari Azad; NZ Shafiei Jandaghi; V Salimi                                                                                                                                                                                                                                                                                                                                                                                                                                              |

|                                                                                                                                                                                                                                                                                                                                                                                                                                                             |                                                                                                                                         |                                                                                                                                                                                                  |                                                                                                                                                                                                                                                                                                                                                                                                                                                                                                                                                                                                                                                                                                                                                                                                                                   |
|-------------------------------------------------------------------------------------------------------------------------------------------------------------------------------------------------------------------------------------------------------------------------------------------------------------------------------------------------------------------------------------------------------------------------------------------------------------|-----------------------------------------------------------------------------------------------------------------------------------------|--------------------------------------------------------------------------------------------------------------------------------------------------------------------------------------------------|-----------------------------------------------------------------------------------------------------------------------------------------------------------------------------------------------------------------------------------------------------------------------------------------------------------------------------------------------------------------------------------------------------------------------------------------------------------------------------------------------------------------------------------------------------------------------------------------------------------------------------------------------------------------------------------------------------------------------------------------------------------------------------------------------------------------------------------|
| EPI_ISL_2285860,<br>EPI_ISL_2535792,<br>EPI_ISL_2873850                                                                                                                                                                                                                                                                                                                                                                                                     | National Influenza Centre                                                                                                               | National Influenza Centre                                                                                                                                                                        | ; Benjamiin B. Lindsey; Benjamin H. Foulkes; Dennis Laryea; Ernest Asiedu; Franklin Asiedu-Bekoe; Gordon Awandare; Ivy A. Asante; Joseph Oliver-Commey; Joyce Ngoli; Linda Boatemaa; Lorretta Kwasa; Mathew D. Parker; Michael Marks; Mildred Adusei-Poku; Sharon Hsu; Thushan I de Silva; William K. Ampofo                                                                                                                                                                                                                                                                                                                                                                                                                                                                                                                      |
| EPI_ISL_402125                                                                                                                                                                                                                                                                                                                                                                                                                                              | National Institute for Communicable Disease Control and Prevention (ICDC) Chinese Center for Disease Control and Prevention (China CDC) | National Institute for Communicable Disease Control and Prevention (ICDC) Chinese Center for Disease Control and Prevention (China CDC)                                                          | Chen; Dai; F.-H.; Hu, Y.; J.-H.; J.-J.; J.-L. and Zhu; Liu, Y.; Pei; Q.-M.; She; Song; T.-Y.; Tao; Tian; Wang; Wang, W.; Wu, F.; Xu, L.; Y.-L.; Y.-M.; Y.-Y.; Y.-Z.; Yu, B.; Z.-G.; Z.-W.; Zhang; Zhao, S.; Zheng                                                                                                                                                                                                                                                                                                                                                                                                                                                                                                                                                                                                                 |
| EPI_ISL_3644034,<br>EPI_ISL_3644065,<br>EPI_ISL_3718064                                                                                                                                                                                                                                                                                                                                                                                                     | National Institute for Communicable Diseases of the National Health Laboratory Service                                                  | National Institute for Communicable Diseases of the National Health Laboratory Service                                                                                                           | Amoako DG; Bhiman JN; Everatt J; Ismail A; Mahlangu B; Mnguni A; Mohale T; Ntuli N; Scheepers C                                                                                                                                                                                                                                                                                                                                                                                                                                                                                                                                                                                                                                                                                                                                   |
| EPI_ISL_469254                                                                                                                                                                                                                                                                                                                                                                                                                                              | National Institute for Viral Disease Control and Prevention, China CDC                                                                  | Institute of Viral Disease Control and Prevention, China CDC                                                                                                                                     | Chun Huang; Dayan Wang; George Fu Gao; Guizhen Wu; Li Zhao; Lijuan Chen; Peihua Niu , Baoying Huang; Roujian Lu; Wenbo Xu; Wenjie Tan; Wenling Wang; Yubai Bi                                                                                                                                                                                                                                                                                                                                                                                                                                                                                                                                                                                                                                                                     |
| EPI_ISL_591275,<br>EPI_ISL_2170893                                                                                                                                                                                                                                                                                                                                                                                                                          | National Institute for Viral Disease Control and Prevention, China CDC                                                                  | National Institute for Viral Disease Control and Prevention, China CDC                                                                                                                           | : 10: 46; 7; Baoying Huang3; Cao Chen; Cao Chen36; Dayan Wang; Dayan Wang3; Dongyan Wang3; Fengjin Li6; George F Gao; George Fu Gao1; Halbo Sun5; Hong Wang; Hong Wang3; Huilai Ma; Huilai Ma16; Ji Wang; Ji Wang36; Jian Cai1; Jianqun Zhang26; Jianxing Yu1; Jingdong Song; Jun Han; Jun Meng2; Li Bail6; Li Zhao3; Liang Wang1; Lingling Mao5; Mingchun Luan2; Naiying Mao3; Ning Li6; Peihua Niu3; Qian Yang3; Ruqin Gao; Shaofeng Jiang9; Shihong Yang2; Shuangli Zhu3; Tao Ma1; Tianjiao Ji3; Wei Yao2*; Wenbo Xu; Wenbo Xu3*; Wenjie Tan3; Wenqing Yao5*; Xiang Ren1; Xiang Zhao; Xiang Zhao3; Yan Zhang3; Yang Song36; Yanhai Wang3; Yao Meng; Yecheng Yao11; Ying Qin16; Yingwei Sun5; Yong Zhang; Yong Zhang3; Yuchao Wu; Yunting Xia8; Zhaoguo Wang; Zhen Zhu3; Zhijian Bo2; Zhixiao Chen; Zhongjie Li1; Zijian Feng1* |
| EPI_ISL_1447484                                                                                                                                                                                                                                                                                                                                                                                                                                             | National Institute of Infectious Diseases (NIID)                                                                                        | National Institute of Infectious Diseases (NIID)                                                                                                                                                 | Hideka Miura; Kentaro Itokawa; Kiyoko Okamoto; Kumiko Araki; Makoto Kuroda; Masanori Hashino; Rina Tanaka; Selichiro Fujisaki; Shinichiro Hirai; Tsuyoshi Sekizuka                                                                                                                                                                                                                                                                                                                                                                                                                                                                                                                                                                                                                                                                |
| EPI_ISL_979803,<br>EPI_ISL_1279947,<br>EPI_ISL_2308250,<br>EPI_ISL_3259564                                                                                                                                                                                                                                                                                                                                                                                  | National Institute of Infectious Diseases-Prof. Dr. Matei Bals Molecular Diagnostics Laboratory                                         | National Institute of Infectious Diseases-Prof. Dr. Matei Bals Molecular Diagnostics Laboratory                                                                                                  | Andreea Tudor; Corina Casangiu; Dan Otelea; Leontina Banica; Marius Surleac; Ovidiu Vlaicu; Petre Milu; Robert Hohan; Simona Paraschiv                                                                                                                                                                                                                                                                                                                                                                                                                                                                                                                                                                                                                                                                                            |
| EPI_ISL_466636,<br>EPI_ISL_466638,<br>EPI_ISL_475083,<br>EPI_ISL_1531554,<br>EPI_ISL_2803761                                                                                                                                                                                                                                                                                                                                                                | National Institute of Laboratory Medicine and Referral Center                                                                           | Genomic Research Lab, BCSIR                                                                                                                                                                      | A. K. M. Shamsuzzaman; Abu Sayeed Mohammad Mahmud; Arifa Akram; Asish Kumar Ghosh; Barna Goswami; Bayzid Bin Monir; Eshrar Osman; Ifrat Jahan; Mahmuda Yeasmin; Md. Ahasan Habib; Md. Kamrul Islam; Md. Maruf Ahmed Molla; Md. Murshed Hasan Sarkar; Md. Murshed Hasan Sarker; Md. Saddam Hossain; Md. Salim Khan; Mohammad Mohi Uddin; Mohammad Samir Uzzaman; Salek Ahmed Sajib; Shahina Akter; Sheikh Md. Selim Al Din; Tanjina Akhter Banu; Tanjina Akhter Banu; Tasnim Nafisa; Utpal Chandra Ray                                                                                                                                                                                                                                                                                                                             |
| EPI_ISL_2323219                                                                                                                                                                                                                                                                                                                                                                                                                                             | National Institute of Public Health                                                                                                     | Charles University, Faculty of Science, BIOCEV, OMICS Genomics                                                                                                                                   | Blanka Hamplová; Ingrid Poláková; Jana Šmahelová; Jiří Novák; Magdalena Jančářová; Ruth Tachezy; Sebastian Cristian Treitli; Vladimír Hampl; Zoltán Füssy; Štěpánka Hrdá                                                                                                                                                                                                                                                                                                                                                                                                                                                                                                                                                                                                                                                          |
| EPI_ISL_2687993                                                                                                                                                                                                                                                                                                                                                                                                                                             | National Institute of Public Health                                                                                                     | National Institute of Infectious Diseases-Prof. Dr. Matei Bals Molecular Diagnostics Laboratory                                                                                                  | Corina Casangiu; Dan Otelea; Leontina Banica; Marius Surleac; Petre Milu; Robert Hohan; Simona Paraschiv                                                                                                                                                                                                                                                                                                                                                                                                                                                                                                                                                                                                                                                                                                                          |
| EPI_ISL_2727050,<br>EPI_ISL_3063179,<br>EPI_ISL_3319026,<br>EPI_ISL_3716755                                                                                                                                                                                                                                                                                                                                                                                 | National Institute of Public Health                                                                                                     | National Institute of Public Health                                                                                                                                                              | Alexander Nagy; Dusan Trnka; Helena Jirincova; Jaromira Vecerova; Timotej Suri                                                                                                                                                                                                                                                                                                                                                                                                                                                                                                                                                                                                                                                                                                                                                    |
| EPI_ISL_1510302,<br>EPI_ISL_2466503,<br>EPI_ISL_2562083,<br>EPI_ISL_2674248,<br>EPI_ISL_3588364                                                                                                                                                                                                                                                                                                                                                             | National Institute of Public Health                                                                                                     | State Veterinary Institute Prague                                                                                                                                                                | A; Alexander Nagy; Cernikov; D; H; Helena Jirincova; J; Jaromira Vecerova; Jirincova; L; Lenka Cernikova; M; Martina Stara; Nagy; Stara; Suri; T; Timotej Suri; Trnka; Vecerova                                                                                                                                                                                                                                                                                                                                                                                                                                                                                                                                                                                                                                                   |
| EPI_ISL_3032389                                                                                                                                                                                                                                                                                                                                                                                                                                             | National Institute of Public Health NIH - National Research Institute                                                                   | National Institute of Public Health NIH - National Research Institute                                                                                                                            | Gierczyński Rafał; Sadowska-Todys Małgorzata; Wołkowicz Tomasz; Zacharczuk Katarzyna                                                                                                                                                                                                                                                                                                                                                                                                                                                                                                                                                                                                                                                                                                                                              |
| EPI_ISL_2928004,<br>EPI_ISL_2928005,<br>EPI_ISL_2928006,<br>EPI_ISL_2928011,<br>EPI_ISL_2928012                                                                                                                                                                                                                                                                                                                                                             | National Institute of Public Health, Bujumbura,Burundi, MRC/UVRI & LSHTM Uganda Research Unit                                           | MRC/UVRI & LSHTM Uganda Research Unit, National Institute of Public Health                                                                                                                       | Alexis Niyomwungere; Anatole Nkeshimana; Dan Lule Bugembe; Deogratius Ssemwanga; Jerome Nkurunziza; Léopold Ouedraogo; Matthew Cotten; My V.T. Phan; Pontiano Kaleebu                                                                                                                                                                                                                                                                                                                                                                                                                                                                                                                                                                                                                                                             |
| EPI_ISL_1056025                                                                                                                                                                                                                                                                                                                                                                                                                                             | National Laboratory for Health, Environment and Food                                                                                    | CISLD (Clinical Institute of Special Laboratory Diagnostics), University Children's Hospital, University Medical Center Ljubljana                                                                | Ana Grom; Barbara Jenko Bizjan; Jernej Kovač; Katarina Kozmos; Marko Pokorn; Maruša Debeljak; Robert Šket; Tadej Battelino; Tine Tesovnik                                                                                                                                                                                                                                                                                                                                                                                                                                                                                                                                                                                                                                                                                         |
| EPI_ISL_3829648                                                                                                                                                                                                                                                                                                                                                                                                                                             | National Laboratory for Health, Environment and Food, OMM, Celje                                                                        | NLZOH (National Laboratory for Health, Environment and Food) / CISLD (Clinical Institute of Special Laboratory Diagnostics), University Children's Hospital, University Medical Center Ljubljana | Aleksander Kocuvan; Aleksander Mahnic; Alenka Štorman; Ana Grom; Barbara Jenko Bizjan; Daša Kavka / Jernej Kovač; Kaja Tominc; Katarina Kozmos; Maja Rupnik; Marko Pokorn; Maruša Debeljak; Mateja Borinc; Maša Jarčič; Nika Gobec; Robert Šket; Sandra Janezic; Tadej Battelino; Tjaša Zohar Čretnik                                                                                                                                                                                                                                                                                                                                                                                                                                                                                                                             |
| EPI_ISL_3316907                                                                                                                                                                                                                                                                                                                                                                                                                                             | National Laboratory for Health, Environment and Food, OMM, Kranj                                                                        | NLZOH (National Laboratory for Health, Environment and Food) / CISLD (Clinical Institute of Special Laboratory Diagnostics), University Children's Hospital, University Medical Center Ljubljana | Aleksander Kocuvan; Aleksander Mahnic; Alenka Štorman; Ana Grom; Barbara Jenko Bizjan; Kaja Tominc; Katarina Kozmos; Maja Rupnik; Marjana Petrevčič / Jernej Kovač; Marko Pokorn; Maruša Debeljak; Mateja Ravnik; Maša Jarčič; Monika Korošec; Nika Gobec; Robert Šket; Sandra Janezic; Tadej Battelino; Tine Tesovnik; Tjaša Zohar Čretnik                                                                                                                                                                                                                                                                                                                                                                                                                                                                                       |
| EPI_ISL_3316557,<br>EPI_ISL_3829151,<br>EPI_ISL_3829415                                                                                                                                                                                                                                                                                                                                                                                                     | National Laboratory for Health, Environment and Food, OMM, Maribor                                                                      | NLZOH (National Laboratory for Health, Environment and Food) / CISLD (Clinical Institute of Special Laboratory Diagnostics), University Children's Hospital, University Medical Center Ljubljana | Aleksander Kocuvan; Aleksander Mahnic; Alenka Štorman; Ana Grom; Andrej Golle / Jernej Kovač; Barbara Jenko Bizjan; Kaja Tominc; Katarina Kozmos; Maja Rupnik; Marko Pokorn; Maruša Debeljak; Maša Jarčič; Mojca Cimerman; Nika Gobec; Nika Volmajer; Robert Šket; Sandra Janezic; Tadej Battelino; Tine Tesovnik; Tjaša Zohar Čretnik                                                                                                                                                                                                                                                                                                                                                                                                                                                                                            |
| EPI_ISL_1240562                                                                                                                                                                                                                                                                                                                                                                                                                                             | National Laboratory for Health, Environment and Food, OMM, Novo mesto                                                                   | CISLD (Clinical Institute of Special Laboratory Diagnostics), University Children's Hospital, University Medical Center Ljubljana                                                                | Ana Grom; Barbara Jenko Bizjan; Jernej Kovač; Katarina Kozmos; Marko Pokorn; Maruša Debeljak; Robert Šket; Tadej Battelino; Tine Tesovnik                                                                                                                                                                                                                                                                                                                                                                                                                                                                                                                                                                                                                                                                                         |
| EPI_ISL_512639                                                                                                                                                                                                                                                                                                                                                                                                                                              | National Laboratory for Influenza/Virology reference laboratory, Public Health Center of the Ministry of Health of Ukraine              | Respiratory Virus Unit, Microbiology Services Colindale, Public Health England                                                                                                                   | Dr. Iryna Demchyshyna; PHE Covid Sequencing Team                                                                                                                                                                                                                                                                                                                                                                                                                                                                                                                                                                                                                                                                                                                                                                                  |
| EPI_ISL_647980,<br>EPI_ISL_1191805,<br>EPI_ISL_1191818,<br>EPI_ISL_1191819,<br>EPI_ISL_1191822,<br>EPI_ISL_1191895                                                                                                                                                                                                                                                                                                                                          | National Microbiology Reference Laboratory                                                                                              | Quadram Institute Bioscience                                                                                                                                                                     | Agnes Juru; Alexander Goredema; Ana-Victoria Gutierrez; Andrew J. Page; Andrew Tarupiwa; Barbra Murwira; Beuty Makamure; Charles Nyagupe; David Baker; Faustinos T Takawira; Gaetan Thilliez; Gemma Kay; Gibson Mhlanga; Hlanai Gumbo; Isaac Phiri; Justin O'Grady; Kenneth K Maeka; Leonardo de Oliveira Martins; Muchaneta Mugabe; Portia Manangazira; Raiva Simbi; Robert Kingsley; Sekesai Zinyowera; Tapfumanai Mashe; Tatenda Takawira; Thanh Le Viet                                                                                                                                                                                                                                                                                                                                                                       |
| EPI_ISL_3722283, EPI_ISL_3722286, EPI_ISL_3722287, EPI_ISL_3722310, EPI_ISL_3730395, EPI_ISL_3730400, EPI_ISL_3730429, EPI_ISL_3730431, EPI_ISL_3730481, EPI_ISL_3730482                                                                                                                                                                                                                                                                                    | see above                                                                                                                               | National Microbiology Reference Laboratory, Ministry of Health, Harare, Zimbabwe                                                                                                                 | Agnes Juru; Air Comodor Dr J. Chimedza; Charles Nyagupe; Dr Raiva Simbi; Emmanuel SJ; Giandhari J; Hlanai Gumbo; Kenneth Maeka; Naidoo Y; Pillay S; Tapfumanai Mashe; Tatenda Takawira; Tegally H; Wilkinson E; de Oliveira T                                                                                                                                                                                                                                                                                                                                                                                                                                                                                                                                                                                                     |
| EPI_ISL_2483712,<br>EPI_ISL_2756206                                                                                                                                                                                                                                                                                                                                                                                                                         | National Platform bis UMONS/Jolimont                                                                                                    | National Platform bis UMONS/Jolimont                                                                                                                                                             | Eric Tarantino; Florian Juszczak; François Dufrasne; Gautier Detry; Guillaume Bayon-Vicente; Ruddy Wattiez                                                                                                                                                                                                                                                                                                                                                                                                                                                                                                                                                                                                                                                                                                                        |
| EPI_ISL_3547669, EPI_ISL_3547673, EPI_ISL_3547676, EPI_ISL_3547686, EPI_ISL_3547687, EPI_ISL_3547689, EPI_ISL_3547690, EPI_ISL_3547691, EPI_ISL_3547694, EPI_ISL_3547703                                                                                                                                                                                                                                                                                    | see above                                                                                                                               | National Public Health Institute of Liberia Reference Lab                                                                                                                                        | Bode Shobayo; Jane MaCauley; Komal Jain; Mitali Mishra; Nischay Mishra; Thomas Briesse; W. Ian Lipkin                                                                                                                                                                                                                                                                                                                                                                                                                                                                                                                                                                                                                                                                                                                             |
| EPI_ISL_2479957                                                                                                                                                                                                                                                                                                                                                                                                                                             | National Public Health Laboaratory                                                                                                      | CSIR-Institute of Genomics and Integrative Biology                                                                                                                                               | Jyoti Acharya; Lokbandhu Chaudhary; Priya Jha; Runa Jha; Suni Dangol                                                                                                                                                                                                                                                                                                                                                                                                                                                                                                                                                                                                                                                                                                                                                              |
| EPI_ISL_3235144                                                                                                                                                                                                                                                                                                                                                                                                                                             | National Public Health Laboratory                                                                                                       | Laboratory of Respiratory Viruses and Measles, Oswaldo Cruz Institute, FIOCRUZ                                                                                                                   | Alice Sampaio Rocha; Ana Carolina Mendonca; Anna Carolina Paixao; Elisa Cavalcante Pereira; Fernando Motta; Luciana Appolinario; Marilda Siqueira on behalf of the Fiocruz COVID-19 Genomic Surveillance Network; Michelle Hamilton; Paola Resende; Renata Serrano Lopes; Taina Venas                                                                                                                                                                                                                                                                                                                                                                                                                                                                                                                                             |
| EPI_ISL_2674094                                                                                                                                                                                                                                                                                                                                                                                                                                             | National Public Health Laboratory                                                                                                       | National Public Health Laboratory/CSIR-Institute of Genomics and Integrative Biology                                                                                                             | National Public Health Laboratory Team                                                                                                                                                                                                                                                                                                                                                                                                                                                                                                                                                                                                                                                                                                                                                                                            |
| EPI_ISL_754073                                                                                                                                                                                                                                                                                                                                                                                                                                              | National Public Health Laboratory                                                                                                       | Nepal Health Research Council                                                                                                                                                                    | Meghnath Dhimal; Pradip Gyanwali                                                                                                                                                                                                                                                                                                                                                                                                                                                                                                                                                                                                                                                                                                                                                                                                  |
| EPI_ISL_845546,<br>EPI_ISL_845551                                                                                                                                                                                                                                                                                                                                                                                                                           | National Public Health Laboratory, Cameroom                                                                                             | African Centre of Excellence for Genomics of Infectious Diseases (ACEGID), Redeemer's University                                                                                                 | Oluniyi P.E. et al                                                                                                                                                                                                                                                                                                                                                                                                                                                                                                                                                                                                                                                                                                                                                                                                                |
| EPI_ISL_2450774,<br>EPI_ISL_2450805                                                                                                                                                                                                                                                                                                                                                                                                                         | National Public Health Laboratory, Ministry of Health, Ministry of Health, Republic of South Sudan                                      | South Sudan Ministry of Health, WHO South Sudan, MRC/UVRI & LSHTM Uganda Research Unit                                                                                                           | Abe G. Abias; Dan Lule Bugembe; Dennis Kenyi Lodiongo; James Ayel; John Rumunu; Joseph Francis Wamala; Juma John HM; Lul Lojok Deng; Matthew Cotten; My V.T. Phan; Pontiano Kaleebu; Richard Lino Loro Lako; Sudhir Bungal                                                                                                                                                                                                                                                                                                                                                                                                                                                                                                                                                                                                        |
| EPI_ISL_410713, EPI_ISL_418994, EPI_ISL_422431, EPI_ISL_493421, EPI_ISL_498602, EPI_ISL_498611, EPI_ISL_536445, EPI_ISL_596473, EPI_ISL_596490, EPI_ISL_645128, EPI_ISL_693331, EPI_ISL_728201, EPI_ISL_804004, EPI_ISL_995295, EPI_ISL_1081928, EPI_ISL_1489726, EPI_ISL_1719873, EPI_ISL_2349711, EPI_ISL_2349737, EPI_ISL_2349858, EPI_ISL_2508865, EPI_ISL_2509054, EPI_ISL_2621931, EPI_ISL_3008996, EPI_ISL_3262082, EPI_ISL_3573015, EPI_ISL_3737383 |                                                                                                                                         |                                                                                                                                                                                                  |                                                                                                                                                                                                                                                                                                                                                                                                                                                                                                                                                                                                                                                                                                                                                                                                                                   |



|                                                                                                                                                                                                                                                                                                                                                                                                  |                                                                                                                                                                                                                     |                                                                                                                            |                                                                                                                                                                                                                                                                                                                                                                                                                                                                                                                                                                                                                                                            |
|--------------------------------------------------------------------------------------------------------------------------------------------------------------------------------------------------------------------------------------------------------------------------------------------------------------------------------------------------------------------------------------------------|---------------------------------------------------------------------------------------------------------------------------------------------------------------------------------------------------------------------|----------------------------------------------------------------------------------------------------------------------------|------------------------------------------------------------------------------------------------------------------------------------------------------------------------------------------------------------------------------------------------------------------------------------------------------------------------------------------------------------------------------------------------------------------------------------------------------------------------------------------------------------------------------------------------------------------------------------------------------------------------------------------------------------|
| see above                                                                                                                                                                                                                                                                                                                                                                                        | National Public Health Laboratory, National Centre for Infectious Diseases                                                                                                                                          | National Public Health Laboratory, National Centre for Infectious Diseases                                                 | Chavatte JM; Cui L; Grace Jie Yin Ngan; Grace Ngan; Katherine Ching; Lin Cui; Lin RTP; Mak TM; Octavia S; Raymond Tzer Pin Lin; Royce Ang; Sophie Octavia; Tze Minn Mak; Zhenyang Zhou; Zhou Z                                                                                                                                                                                                                                                                                                                                                                                                                                                             |
| EPI_ISL_3184538                                                                                                                                                                                                                                                                                                                                                                                  | National Public Health Laboratory/COVID-19 Testing Lab Dailekh                                                                                                                                                      | National Public Health Laboratory/CSIR-Institute of Genomics and Integrative Biology                                       | National Public Health Laboratory Team /COVID-19 Testing Lab Dailekh Team                                                                                                                                                                                                                                                                                                                                                                                                                                                                                                                                                                                  |
| EPI_ISL_3184527                                                                                                                                                                                                                                                                                                                                                                                  | National Public Health Laboratory/Dadeldhura, COVID-19 PCR Lab                                                                                                                                                      | National Public Health Laboratory/CSIR-Institute of Genomics and Integrative Biology                                       | COVID-19 PCR Lab Team; National Public Health Laboratory Team /Dadeldhura                                                                                                                                                                                                                                                                                                                                                                                                                                                                                                                                                                                  |
| EPI_ISL_3184524                                                                                                                                                                                                                                                                                                                                                                                  | National Public Health Laboratory/Mahakali, COVID-19 PCR Lab                                                                                                                                                        | National Public Health Laboratory/CSIR-Institute of Genomics and Integrative Biology                                       | COVID-19 PCR Lab Team; National Public Health Laboratory Team /Mahakali                                                                                                                                                                                                                                                                                                                                                                                                                                                                                                                                                                                    |
| EPI_ISL_3184551                                                                                                                                                                                                                                                                                                                                                                                  | National Public Health Laboratory/PPHL-Karnali                                                                                                                                                                      | National Public Health Laboratory/CSIR-Institute of Genomics and Integrative Biology                                       | National Public Health Laboratory Team /PPHL-Karnali Team                                                                                                                                                                                                                                                                                                                                                                                                                                                                                                                                                                                                  |
| EPI_ISL_2674083                                                                                                                                                                                                                                                                                                                                                                                  | National Public Health Laboratory/Trishuli Hospital COVID 19 PCR Lab                                                                                                                                                | National Public Health Laboratory/CSIR-Institute of Genomics and Integrative Biology                                       | National Public Health Laboratory Team /Trishuli Hospital COVID 19 PCR Lab Team                                                                                                                                                                                                                                                                                                                                                                                                                                                                                                                                                                            |
| EPI_ISL_480299                                                                                                                                                                                                                                                                                                                                                                                   | National Reference Laboratory "Influenza and acute respiratory diseases"                                                                                                                                            | NRL-HIV                                                                                                                    | Ivailo Alexiev; Ivan Ivanov; Ivva Philipova                                                                                                                                                                                                                                                                                                                                                                                                                                                                                                                                                                                                                |
| EPI_ISL_1273392                                                                                                                                                                                                                                                                                                                                                                                  | National Reference Laboratory - Ministry of Health Maseru Lesotho                                                                                                                                                   | National Institute for Communicable Diseases of the National Health Laboratory Service                                     | Amoako DG; Banda R; Bhiman JN; Gorova V; Ismail A; Mahlangu B; Mathabo M; Mohale T; Mooko M; Ntuli N; Scheepers C                                                                                                                                                                                                                                                                                                                                                                                                                                                                                                                                          |
| EPI_ISL_962877, EPI_ISL_3602088, EPI_ISL_3602112, EPI_ISL_3681514, EPI_ISL_3681525                                                                                                                                                                                                                                                                                                               | National Virology Reference Laboratory                                                                                                                                                                              | National Public Health Laboratory, National Centre for Infectious Diseases                                                 | Katherine Ching; Lin Cui; Raymond Tzer Pin Lin; Royce Ang; Taib Surita; Tze Minn Mak; Zaini Zainun; Zhenyang Zhou                                                                                                                                                                                                                                                                                                                                                                                                                                                                                                                                          |
| EPI_ISL_848095                                                                                                                                                                                                                                                                                                                                                                                   | National Virus Reference Laboratory                                                                                                                                                                                 | Irish Coronavirus Sequencing Consortium - National University of Ireland Galway                                            | Grainne Mc Andrew; Kate Reddington; Simone Coughlan                                                                                                                                                                                                                                                                                                                                                                                                                                                                                                                                                                                                        |
| EPI_ISL_501261, EPI_ISL_525385, EPI_ISL_752571, EPI_ISL_1132602, EPI_ISL_1180578, EPI_ISL_1732235, EPI_ISL_2131948, EPI_ISL_2132094, EPI_ISL_2132109, EPI_ISL_2363459, EPI_ISL_2490969, EPI_ISL_2710694, EPI_ISL_2862248, EPI_ISL_2933927, EPI_ISL_3011570, EPI_ISL_3136294, EPI_ISL_3468162, EPI_ISL_3502991, EPI_ISL_3503013, EPI_ISL_3672049, EPI_ISL_3739299                                 | National Virus Reference Laboratory                                                                                                                                                                                 | National Virus Reference Laboratory                                                                                        | Aditi Chaturvedi; Calum Walsh; Charlene Bennet; Charlene Bennett; Cillian F De Gascun; Daniel Hare; Fiona Crispie; Gabriel Gonzalez; Guerrino Macori; Jonathan Dean; Matthew McCabe; Michael Carr; Paul Cotter; Seamus Fanning; Suzie Coughlan; Zoe Yandle                                                                                                                                                                                                                                                                                                                                                                                                 |
| EPI_ISL_2533834, EPI_ISL_2533850, EPI_ISL_2533870, EPI_ISL_2533882, EPI_ISL_2858619, EPI_ISL_2860830, EPI_ISL_3845304, EPI_ISL_3845322, EPI_ISL_3845338                                                                                                                                                                                                                                          | see above                                                                                                                                                                                                           | Naval Medical Research Unit No. 3                                                                                          | Naval Medical Research Centre Biological Defense Research Directorate                                                                                                                                                                                                                                                                                                                                                                                                                                                                                                                                                                                      |
| see above                                                                                                                                                                                                                                                                                                                                                                                        | Naval Medical Research Unit No. 3                                                                                                                                                                                   | Naval Medical Research Centre Biological Defense Research Directorate                                                      | Andrea E. Luquette; Andrew J. Bennett; Bishwo N. Adhikari; Catherine E. Arnold; Chaselynn M. Watters; Emily K. Stefanov; Francisco Malagon; Kyle A. Long; Lindsay A. Glang; Logan J. Voegtly; Luis A. Estrella; Michael V. Deschenes; Regina Z. Cer; Robin H. Miller; Stephen M. Eggan; and Kimberly A. Bishop-Lilly                                                                                                                                                                                                                                                                                                                                       |
| EPI_ISL_3791308                                                                                                                                                                                                                                                                                                                                                                                  | Navavej Hospital                                                                                                                                                                                                    | COVID-19 Network Investigations (CONI) Alliance                                                                            | Angkana Huang; Anthony R. Jones; Arporn Wangwiwatsin; Bhakbhoorn Panthan; Chonticha Klungtong; Duangkamon Loesbanluechai; Ekawat Pasomsub; Elizabeth Batty; Insee Sensor; Janjira Thaipadungpanit; Khajohn Joonlasak; Kingkan Rakmanee; Krittikorn Kumpornsin; Namfon Kotanan; Stefan Fernandez; Thanat Chookajorn; Theerarat Kochakarn; Treewat Watthanachockchai; Wasun Chantrattita; Wudtichai Manasatienkj                                                                                                                                                                                                                                             |
| EPI_ISL_2091003, EPI_ISL_2651135, EPI_ISL_3346532, EPI_ISL_3696628                                                                                                                                                                                                                                                                                                                               | Nebraska Public Health Laboratory                                                                                                                                                                                   | NPHL COVID-19 Response Team                                                                                                | NPHL COVID-19 Response Team                                                                                                                                                                                                                                                                                                                                                                                                                                                                                                                                                                                                                                |
| EPI_ISL_475190                                                                                                                                                                                                                                                                                                                                                                                   | Nebraska Public Health Laboratory                                                                                                                                                                                   | UNMC COVID-19 Response Team                                                                                                | UNMC COVID-19 Response Team                                                                                                                                                                                                                                                                                                                                                                                                                                                                                                                                                                                                                                |
| EPI_ISL_3101469                                                                                                                                                                                                                                                                                                                                                                                  | Nemocnice Trebic                                                                                                                                                                                                    | University Hospital Brno, CMGB                                                                                             | Jan Svaton; Kristyna Dufkova; Martina Lengerova; Matej Bezdicek                                                                                                                                                                                                                                                                                                                                                                                                                                                                                                                                                                                            |
| EPI_ISL_754068, EPI_ISL_754070                                                                                                                                                                                                                                                                                                                                                                   | Nepal Korea Friendship Municipality Hospital                                                                                                                                                                        | Nepal Health Research Council                                                                                              | Meghnath Dhimal; Pradip Gyanwali                                                                                                                                                                                                                                                                                                                                                                                                                                                                                                                                                                                                                           |
| EPI_ISL_3717578                                                                                                                                                                                                                                                                                                                                                                                  | Neuberg Suprattech Reference Laboratory, Ahmedabad                                                                                                                                                                  | Gujarat Biotechnology Research Centre                                                                                      | Arpit Shukla; Bhadreshsinh Gohil; Chaitanya Joshi; Dinesh Kumar; Janvi Raval; Madhvi Joshi; Nimesh Patel; Nitin Savaliya; Nitin Shukla; Ramesh Pandit; Shiva; Sonal Sharma; Twinkle Soni; Zarna Patel                                                                                                                                                                                                                                                                                                                                                                                                                                                      |
| EPI_ISL_1219874, EPI_ISL_1219879, EPI_ISL_1219886, EPI_ISL_1263190, EPI_ISL_3761182                                                                                                                                                                                                                                                                                                              | Nevada State Public Health Laboratory                                                                                                                                                                               | Nevada State Public Health Laboratory                                                                                      | Andrew Gorzalski; Mark Pandori                                                                                                                                                                                                                                                                                                                                                                                                                                                                                                                                                                                                                             |
| EPI_ISL_1791135                                                                                                                                                                                                                                                                                                                                                                                  | New Mexico Department of Health Scientific Laboratory                                                                                                                                                               | Center for Global Health, University of New Mexico Health Sciences Center                                                  | Anastacia Griego; Darrell Dinwiddie; Daryl Domman; Joseph Hicks; Kurt Schwalm; Michael Edwards; Twila Kunde; Valerie Morley                                                                                                                                                                                                                                                                                                                                                                                                                                                                                                                                |
| EPI_ISL_831916, EPI_ISL_1186050, EPI_ISL_2858925, EPI_ISL_3812697                                                                                                                                                                                                                                                                                                                                | New Mexico Department of Health Scientific Laboratory                                                                                                                                                               | New Mexico Department of Health Scientific Laboratory                                                                      | Anastacia Griego-Fisher; D'eldra Malone; Ellie Johnson; Jennifer Benoit; Keila Gutierrez; Linda Salazar; Ratheesh Rajan                                                                                                                                                                                                                                                                                                                                                                                                                                                                                                                                    |
| EPI_ISL_1061035, EPI_ISL_2107450, EPI_ISL_2107529, EPI_ISL_2107530, EPI_ISL_2107534, EPI_ISL_3072006                                                                                                                                                                                                                                                                                             | New South Wales Health Pathology Royal Prince Alfred Hospital                                                                                                                                                       | Microbiology RPAH                                                                                                          | Au, J.; Bull, R.; Deveson, I.; Foster, C.; Rawlinson, W.; Ruiz Silva, M.; Van Hal, S.                                                                                                                                                                                                                                                                                                                                                                                                                                                                                                                                                                      |
| EPI_ISL_1196009                                                                                                                                                                                                                                                                                                                                                                                  | Nhlangano Health Centre                                                                                                                                                                                             | National Institute for Communicable Diseases of the National Health Laboratory Service                                     | Amoako DG; Bhiman JN; Ismail A; Mahlangu B; Maphalala GP; Mohale T; Ntuli N; Scheepers C                                                                                                                                                                                                                                                                                                                                                                                                                                                                                                                                                                   |
| EPI_ISL_516934                                                                                                                                                                                                                                                                                                                                                                                   | Nicolae Testemitanu State University of Medicine and Pharmacy                                                                                                                                                       | International Centre for Genetic Engineering and Biotechnology (ICGEB) and ARGO Open Lab Platform for Genome Sequencing    | Dal Monego S; Licastro D; Marcello A; Rajasekharan S; Ulinici M                                                                                                                                                                                                                                                                                                                                                                                                                                                                                                                                                                                            |
| EPI_ISL_1242024                                                                                                                                                                                                                                                                                                                                                                                  | Nigeria Centre for Disease Control (NCDC)                                                                                                                                                                           | African Centre of Excellence for Genomics of Infectious Diseases (ACEGID), Redeemer's University                           | Oluniyi P.E. et al                                                                                                                                                                                                                                                                                                                                                                                                                                                                                                                                                                                                                                         |
| EPI_ISL_455412, EPI_ISL_527884, EPI_ISL_729967, EPI_ISL_729981, EPI_ISL_729989, EPI_ISL_730019                                                                                                                                                                                                                                                                                                   | Nigeria Centre for Disease Control (NCDC)                                                                                                                                                                           | African Centre of Excellence for Genomics of Infectious Diseases (ACEGID), Redeemer's University, Ede, Osun State, Nigeria | Ajogbasile F.V.; Folarin O.A.; Happi C.T.; Ihekweazu C.; Kayode A.; Oguzie J.; Olawoye I.; Olumade T.; Oluniyi P.E.; Oluniyi P.E. et al; Uwanibe J.                                                                                                                                                                                                                                                                                                                                                                                                                                                                                                        |
| EPI_ISL_1093450, EPI_ISL_1235657                                                                                                                                                                                                                                                                                                                                                                 | Nigerian Centre for Disease Control (NCDC)                                                                                                                                                                          | African Centre of Excellence for Genomics of Infectious Diseases (ACEGID), Redeemer's University                           | I.B.; Olawoye; et al; et.al                                                                                                                                                                                                                                                                                                                                                                                                                                                                                                                                                                                                                                |
| EPI_ISL_3407826                                                                                                                                                                                                                                                                                                                                                                                  | Nonthaburi Public Health Office                                                                                                                                                                                     | National Institute of Health, Department of Medical Sciences, Ministry of Public Health, Thailand                          | ; Natchaya Khiahsang; Nuttida Thongpramul; Pakorn Piromtong; Pilailuk Okada; Ratana Tacharoenmuang; Siripaporn Phuyung; Sittiporn Pammen; Sunthareeya Waicharoen; Thanutsapa Thanadachakul; Warawan Wongboot; sirikanda wimol                                                                                                                                                                                                                                                                                                                                                                                                                              |
| EPI_ISL_2363972                                                                                                                                                                                                                                                                                                                                                                                  | NordLab Oulu                                                                                                                                                                                                        | Expert Microbiology, National Institute for Health and Welfare                                                             | Carita Savolainen-Kopra; Erika Lindh; Haider al-Hello; Jani Halkilahti; Kirsi Liitsola; Niina Ikonen; Pekka Ellonen; Päivi Laurila; Sari Hannula; Soile Blomqvist; Teemu Smura                                                                                                                                                                                                                                                                                                                                                                                                                                                                             |
| EPI_ISL_848639, EPI_ISL_2339915, EPI_ISL_2661712, EPI_ISL_2858839, EPI_ISL_3062318, EPI_ISL_3370369, EPI_ISL_3370377, EPI_ISL_3758651                                                                                                                                                                                                                                                            | see above                                                                                                                                                                                                           | North Dakota Department of Health, Public Health Laboratory                                                                | Lisa Wingerter                                                                                                                                                                                                                                                                                                                                                                                                                                                                                                                                                                                                                                             |
| EPI_ISL_456395, EPI_ISL_579406, EPI_ISL_579407, EPI_ISL_3760067                                                                                                                                                                                                                                                                                                                                  | North Shore Hospital                                                                                                                                                                                                | Institute of Environmental Science and Research (ESR)                                                                      | Anja Werno; Antje van der Linden; Arlo Upton; Chris Mansell; David Hammer; Dragana Drinkovic; Erasmus Smit; Gary McAuliffe; Hana Sofia Andersson; Hermes Perez; James Ussher; Jill Sherwood; Jing Wang; Joep de Ligt; Josh Freeman; Julia Howard; Juliet Elvy; Lauren Jelly; Mary DeAlmeida; Matt Blakiston; Matt Storey; Matthew Rogers; Max Bloomfield; Michael Addidge; Michelle Balm; Muhammad Faisal; Nikki Freed; Olin Silander; Olivia Stroeven; Rachel Boyle; Sally Roberts; SallyAnn Harbison; Sarah Jefferies; Sharmini Muttaiyah; Susan Morpeth; Susan Taylor; Timothy Blackmore; Vani Sathyendran; Veronica Playle; Virginia Hope; Xiaoyun Ren |
| EPI_ISL_2126773                                                                                                                                                                                                                                                                                                                                                                                  | Northumbria University / South Tees Hospitals NHS Foundation Trust / North Cumbria Integrated Care NHS Foundation Trust / North Tees and Hartlepool NHS Foundation Trust / Newcastle Hospitals NHS Foundation Trust | COVID-19 Genomics UK (COG-UK) Consortium                                                                                   | Andrew Nelson; Brendan Payne; Clive Graham; Darren L Smith; Debra Padgett; Edward Barton; Emma Swindells; Garren Scott; Gary Black; Gary Eltringham; Giles S Holt; Greg R Young; Jane Greenaway; Jennifer Collins; John Allan; Joshua Loh; Lynn Dover; Matthew Bashton; Mohammad A Tariq; Paul Baker; Sarah Essex; Steve Liggett; Wen C Yew; Yusri Taha                                                                                                                                                                                                                                                                                                    |
| EPI_ISL_2842603                                                                                                                                                                                                                                                                                                                                                                                  | Northwestern Memorial Hospital                                                                                                                                                                                      | Northwestern University - Ozer Lab                                                                                         | Chad J. Achenbach; Chao Qi; Egon A. Ozer; Judd F. Hultquist; Lacy M. Simons; Lawrence J. Jennings; Michael G. Ison; Ramon Lorenzo-Redondo; Taylor J. Dean                                                                                                                                                                                                                                                                                                                                                                                                                                                                                                  |
| EPI_ISL_925853, EPI_ISL_925872, EPI_ISL_925900, EPI_ISL_925903, EPI_ISL_960257, EPI_ISL_960302, EPI_ISL_1301745, EPI_ISL_1301754, EPI_ISL_1301754, EPI_ISL_2362521, EPI_ISL_2521987, EPI_ISL_2521989, EPI_ISL_2521992, EPI_ISL_2521993, EPI_ISL_2521997, EPI_ISL_2811723, EPI_ISL_2828478, EPI_ISL_3012181, EPI_ISL_3012190, EPI_ISL_3012193, EPI_ISL_3012196, EPI_ISL_3012201, EPI_ISL_3012218, | see above                                                                                                                                                                                                           | Nucleic Acid Testing, National Reference                                                                                   | GIGA Medical Genomics                                                                                                                                                                                                                                                                                                                                                                                                                                                                                                                                                                                                                                      |
| see above                                                                                                                                                                                                                                                                                                                                                                                        | Nucleic Acid Testing, National Reference                                                                                                                                                                            | GIGA Medical Genomics                                                                                                      | Bouchra Boujemla; Corinne Fasquelle; Esperence Umumararungu; Jacob Souopgui; Keith Durkin; Léon Mutesa; Maria Artesi; Marie-Pierre Hayette; Nathalie Renotte; Patrick Tuyisenge; Reuben Sindayiheba; Robert Rutayisire; Sabin Nsanzimana; Swaibu Gatara; Sébastien Bontems;                                                                                                                                                                                                                                                                                                                                                                                |

|                                                                                                                                                                                                                                                                                                                                                                                                                                                                                                                                                                                                                                                                                                                                                                 |                                                                                                                                                  |                                                                                                         |                                                                                                                                                                                                                                                                                                                                                                                                                                                                                                                                                                                                                                                                                                                                                                                                                |
|-----------------------------------------------------------------------------------------------------------------------------------------------------------------------------------------------------------------------------------------------------------------------------------------------------------------------------------------------------------------------------------------------------------------------------------------------------------------------------------------------------------------------------------------------------------------------------------------------------------------------------------------------------------------------------------------------------------------------------------------------------------------|--------------------------------------------------------------------------------------------------------------------------------------------------|---------------------------------------------------------------------------------------------------------|----------------------------------------------------------------------------------------------------------------------------------------------------------------------------------------------------------------------------------------------------------------------------------------------------------------------------------------------------------------------------------------------------------------------------------------------------------------------------------------------------------------------------------------------------------------------------------------------------------------------------------------------------------------------------------------------------------------------------------------------------------------------------------------------------------------|
|                                                                                                                                                                                                                                                                                                                                                                                                                                                                                                                                                                                                                                                                                                                                                                 | Laboratory                                                                                                                                       |                                                                                                         | Vincent Bours; Yvan Butera                                                                                                                                                                                                                                                                                                                                                                                                                                                                                                                                                                                                                                                                                                                                                                                     |
| EPI_ISL_525802, EPI_ISL_1122242, EPI_ISL_3395844, EPI_ISL_1366744                                                                                                                                                                                                                                                                                                                                                                                                                                                                                                                                                                                                                                                                                               | OHSU Lab Services Molecular Microbiology Lab<br><br>OLVZ Aalst<br>OUCRU                                                                          | Oregon SARS-CoV-2 Genome Sequencing Center<br><br>OLVZ Aalst<br>OUCRU                                   | Alec J. Hirsch; Andrew C. Adey; Benjamin N. Bimber; Brendan L. O'Connell; Brian J. O'Roak; Daniel N. Streblow; Donna Hansel; Guang Fan; Kayla Carter; Qin; Ruth V. Nichols; Sally Grindstaff; William B. Messer; Xuan Astrid Holderbeke                                                                                                                                                                                                                                                                                                                                                                                                                                                                                                                                                                        |
| EPI_ISL_3214708, EPI_ISL_1138855                                                                                                                                                                                                                                                                                                                                                                                                                                                                                                                                                                                                                                                                                                                                | Ochsner Health<br>Office of Diseases Prevention and Control Region 4 Saraburi                                                                    | Bioinfoexperts<br>COVID-19 Network Investigations (CONI) Alliance                                       | Amy Feehan; Ben Lain; Chris Huston; David J. Nolan; Judy Crabtree; Julia-Garcia-Diaz; Lucio Miele; Rebecca Rose; Samuel Moot; Susanna L. Lamers; Tessa LaFleur<br>Angkana Huang; Anthony R. Jones; Arporn Wangwiwatsin; Bhakbhoom Panthan; Chonticha Klungtong; Duangkamon Loesbanluechai; Ekawat Pasomsub; Elizabeth Batty; Insee Semsorn; Janjira Thaipaadungpanit; Jutikul Kaewmalakul; Khajohn Joonlasak; Kingkan Rakmanee; Krittikorn Kumpornsin; Namfon Kotanan; Nathamon Runnachot; Pakjira Rimdust; Payon Pengyo; Prama Moonmuang; Sataporn Hatsadichart; Sirinapa Singthong; Siriporn Lakesukthom; Sirirwan Yaemnimnual; Stefan Fernandez; Sutthiruk Changchawai; Thanat Chookajorn; Theerarat Kochakarn; Treewat Wattanachockchai; Wasun Chantratita; Wonvimol Lemprasert; Wudtichai Manasatienkij   |
| EPI_ISL_2544511, EPI_ISL_492017, EPI_ISL_457701, EPI_ISL_457706, EPI_ISL_457977, EPI_ISL_457998                                                                                                                                                                                                                                                                                                                                                                                                                                                                                                                                                                                                                                                                 | Ohio Department of Health Laboratory<br><br>Oman-NIC<br>Oman-NIC                                                                                 | Ohio Department of Health Laboratory<br>Department of Microbiology and Immunology-SQUH<br><br>Oman-NIC  | Allison Black; Brent Lee; Caitlin McDonnell; Eric Brandt; Erica Leasure; Glen McGillivray; Heather Blankenship; Holmes; Jade Mowery; Jennifer; Kelsey Florek; Keoni Omura; Kirtana Ramadugu; Quanta Brown; Stephanie Mccracken; Tyler Payne; and Tammy Bannerman<br>Abdulla Balkhair; Ahlam Al-Amri; Aisha Al-Amri; Aisha Al-Busaidi; Amina Al Jardani; Fahad Zadjali; Fatma BaAlawi; Hamida AL Barwani; Hanan Al-kind; Intisar Al-Shukri; Khulood Al-Mammary; Mohammed Al-Tobi; Samiha Al Kharusi; Samira Al-Maruqi; Zeyana AL-Dahmani<br>Abdulla Balkhair; Ahlam Al-Amri; Aisha Al-Amri; Aisha Al-Busaidi; Amina Al Jardani; Fahad Zadjali; Fatma BaAlawi; Hamida AL Barwani; Hanan Al-kind; Intisar Al-Shukri; Khulood Al-Mammary; Mohammed Al-Tobi; Samiha Al Kharusi; Samira Al-Maruqi; Zeyana AL-Dahmani |
| EPI_ISL_2921173, EPI_ISL_2921187, EPI_ISL_2921200, EPI_ISL_2921201, EPI_ISL_2925607, EPI_ISL_2925617, EPI_ISL_2925619                                                                                                                                                                                                                                                                                                                                                                                                                                                                                                                                                                                                                                           | see above                                                                                                                                        | Oman-NIC                                                                                                | Aisha Al-Busaidi; Amina Al Jardani; Bilal Hussain.; Fahad Al Balushi; Hanan Al Kindi; Intisar Al-Shukri; Intisar Al-Shukri.; Laila Al Balushi; Samiha Al Kharusi                                                                                                                                                                                                                                                                                                                                                                                                                                                                                                                                                                                                                                               |
| EPI_ISL_1532300, EPI_ISL_766569                                                                                                                                                                                                                                                                                                                                                                                                                                                                                                                                                                                                                                                                                                                                 | Oman-National Influenza Center<br>Oman-National Influenza Center                                                                                 | Biotechnology & OMICs Laboratory<br>Oman-National Influenza Center                                      | Abdul Latif Khan; Ahmed Al Harrasi.; Ahmed Al-Rawahi; Ahmed N Al-Rawahi; Aisha Al-Amri; Amal Al-Maani; Amina Al-Jardani; Bilal Hussain; Hanan Al-Kindi; Intisar Al-Shukri; Sajjad Asaf; Samira Al-Mahruqi; Samiya Al-Zadjali; Saqib Bilal<br>Aisha Al-Busaidi; Amina Al-Jardani; Hamida Al-Barwani; Hanan Al-Kindi; Intisar Al-Shukri; Laila Al-Balushi; Samiha Al-Kharusi; Samira Al-Mahruqi                                                                                                                                                                                                                                                                                                                                                                                                                  |
| EPI_ISL_1443674, EPI_ISL_3088307                                                                                                                                                                                                                                                                                                                                                                                                                                                                                                                                                                                                                                                                                                                                | Omics Sciences Laboratory                                                                                                                        | Omics Sciences Laboratory                                                                               | Darlyn Amaya; Derly Andrade Molina; Emily Sulay Saltos Montalvo; Gabriel Morey León; Juan Carlos Fernández Cadena; Katheryn Sacheri Viteri; Paula Juliana Gavilanes Jarrín; Rubén Armas González                                                                                                                                                                                                                                                                                                                                                                                                                                                                                                                                                                                                               |
| EPI_ISL_2713063, EPI_ISL_2933947, EPI_ISL_3370931, EPI_ISL_3806959                                                                                                                                                                                                                                                                                                                                                                                                                                                                                                                                                                                                                                                                                              | Oregon State Public Health Laboratory                                                                                                            | Oregon State Public Health Laboratory                                                                   | Eugene Yeboah; John Fontana and Shane Sevey; Laura Tsaknaris; Rafia Razzaque; Vanda Makris                                                                                                                                                                                                                                                                                                                                                                                                                                                                                                                                                                                                                                                                                                                     |
| EPI_ISL_1040028                                                                                                                                                                                                                                                                                                                                                                                                                                                                                                                                                                                                                                                                                                                                                 | Original detection - Virology Unit, Institut Pasteur du Cambodge; Sequencing - US National Institute of Allergy and Infectious Diseases Cambodia | Virology Unit, Institut Pasteur du Cambodge                                                             | Chau Darapehak; Chin Savuth; Erik A Karlsson; Jennifer Bohl; Jessica Manning; Kraing Sidonn; Ly Sovann; Sophana Chea; Sreyngim Lay; Veasna Duong; Yi Sengdoeurn                                                                                                                                                                                                                                                                                                                                                                                                                                                                                                                                                                                                                                                |
| EPI_ISL_1979567                                                                                                                                                                                                                                                                                                                                                                                                                                                                                                                                                                                                                                                                                                                                                 | Originating lab: Wales Specialist Virology Centre Sequencing lab: Pathogen Genomics Unit                                                         | Public Health Wales Microbiology Cardiff Wales Specialist Virology Centre                               | Alec Birchley; Alexander Adams; Amy Gaskin; Angela Marchbank; Bree Gatica-Wilcox; Catherine Moore; Jason Coombes; Joanne Watkins; Joel Southgate; Johnathan Evans; Laura Gifford; Lauren Gilbert; Lee Graham; Malorie Perry; Matthew Bull; Nicole Pacchiarini; Sally Corden; Sara Kunziene-Summerhayes; Sara Rey; Sarah Taylor; Simon Cottrell; Sophie Jones; Tom Connor                                                                                                                                                                                                                                                                                                                                                                                                                                       |
| EPI_ISL_417488, EPI_ISL_417489, EPI_ISL_2333106                                                                                                                                                                                                                                                                                                                                                                                                                                                                                                                                                                                                                                                                                                                 | Oslo University Hospital, Department of Medical Microbiology                                                                                     | Norwegian Institute of Public Health, Department of Virology                                            | Atiya R Ali; Debec Nadia; Engebretsen Serina Beate; Garcia Llorente Ignacio; Hilde Elshaug; Hilde Vollen; Jon Bråte; Kamilla Heddeland Instefjord; Karoline Bragstad; Kathrine Stene-Johansen; Line Victoria Moen; Marie Paulsen Madsen; Olav Hungnes; Pedersen Benedikte Nevjen; Rasmus Riis Kopperud                                                                                                                                                                                                                                                                                                                                                                                                                                                                                                         |
| EPI_ISL_3014036                                                                                                                                                                                                                                                                                                                                                                                                                                                                                                                                                                                                                                                                                                                                                 | Osp. S.Pertini                                                                                                                                   | National Institute for Infectious Diseases (INMI) L. Spallanzani I.R.C.C.S                              | A Di Caro; B Bartolini; CEM Gruber; E Giombini; F Messina; F Santini; G Bonfiglio; M Rucea; MR Capobianchi; O Butera                                                                                                                                                                                                                                                                                                                                                                                                                                                                                                                                                                                                                                                                                           |
| EPI_ISL_3846616                                                                                                                                                                                                                                                                                                                                                                                                                                                                                                                                                                                                                                                                                                                                                 | Ospedale Santa Caterina Novella                                                                                                                  | Istituto Zooprofilattico Sperimentale della Puglia e della Basilicata                                   | Bianco A.; Bruno A. R.; Capozzi L.; Del Sambio L.; Difato L.; Parisi A.; Simone D.                                                                                                                                                                                                                                                                                                                                                                                                                                                                                                                                                                                                                                                                                                                             |
| EPI_ISL_590992                                                                                                                                                                                                                                                                                                                                                                                                                                                                                                                                                                                                                                                                                                                                                  | Ostfold Hospital Trust - Kalnes, Centre for Laboratory Medicine, Section for gene technology and infection serology                              | Norwegian Institute of Public Health, Department of Virology                                            | Hilde Elshaug; Hilde Vollen; Kamilla Heddeland Instefjord; Karoline Bragstad; Kathrine Stene-Johansen; Olav Hungnes; Rasmus Riis Kopperud                                                                                                                                                                                                                                                                                                                                                                                                                                                                                                                                                                                                                                                                      |
| EPI_ISL_3355747                                                                                                                                                                                                                                                                                                                                                                                                                                                                                                                                                                                                                                                                                                                                                 | Outre mer                                                                                                                                        | National Reference Center for Viruses of Respiratory Infections, Institut Pasteur, Paris                | Angela Brisebarre; Antoine Talarmin; Camille Capel; Christophe Malabat; Corinne Maufrais; Etienne Simon-Lorière; Frédéric Lemoine; Hub de Bioinformatique et Biostatistique; Louise Lefrançois; Marion Barbet; Maud Vanpeene; Méline Bizard; Sylvie Behillil; Sylvie Van der Werf; Vincent Enouf                                                                                                                                                                                                                                                                                                                                                                                                                                                                                                               |
| EPI_ISL_1293350                                                                                                                                                                                                                                                                                                                                                                                                                                                                                                                                                                                                                                                                                                                                                 | Oxford University Clinical Research Unit (OUCRU)                                                                                                 | Oxford University Clinical Research Unit (OUCRU)                                                        | Guy Thwaites; Huynh Trung Trieu; Lam Minh Yen; Le Manh Hung; Le Nguyen Truc Nhu; Le Thi Thu Huong; Nghiem My Ngoc; Ngo Ngoc Quang Minh; Nguyen Thanh Dung; Nguyen Thanh Phong; Nguyen Thanh Truong; Nguyen Thi Thu Hong; Nguyen To Anh; Nguyen Tri Dung; Nguyen Van Vinh Chau; Tran Nguyen Hoang Tu; Tran Tan Thanh; le Van Tan                                                                                                                                                                                                                                                                                                                                                                                                                                                                                |
| EPI_ISL_2695569                                                                                                                                                                                                                                                                                                                                                                                                                                                                                                                                                                                                                                                                                                                                                 | POLOKWANE MANKWENG HOSPITAL                                                                                                                      | National Institute for Communicable Diseases of the National Health Laboratory Service                  | Amoako DG; Bhiman JN; Everatt J; Ismail A; Mahlangu B; Mnguni A; Mohale T; Ntuli N; Scheepers C                                                                                                                                                                                                                                                                                                                                                                                                                                                                                                                                                                                                                                                                                                                |
| EPI_ISL_2229161, EPI_ISL_2384022, EPI_ISL_3127918                                                                                                                                                                                                                                                                                                                                                                                                                                                                                                                                                                                                                                                                                                               | PR Public Health Lab                                                                                                                             | Centers for Disease Control and Prevention Division of Viral Diseases, Pathogen Discovery               | Alex Burgin; Alison Laufer Halpin; Ben L. Rambo-Martin; Clinton R. Paden; Dakota Howard; Darlene Wagner; Dave Wentworth; Dhwani Batra; Jasmine Padilla; Justin Lee; Katie Dillon; Krista Queen; Kristen Knipe; Kristine Loble; Mark Burroughs; Matthew Schmerer; Meghan Bentz; Mili Sheth; Peter Cook; Sam Shepard; Sarah Nobles; Shoshona Le; Suxiang Tong; Vivien Dugan; Yvette Unoarumhi                                                                                                                                                                                                                                                                                                                                                                                                                    |
| EPI_ISL_3459410, EPI_ISL_3459411                                                                                                                                                                                                                                                                                                                                                                                                                                                                                                                                                                                                                                                                                                                                | PREVIS - IPS                                                                                                                                     | Instituto Nacional de Salud                                                                             | Carlos Franco-Muñoz; Carmen Osorio; Diana Malo; Diego A. Álvarez-Díaz; Diego Andrés Prada; Gerardo Santamaría; Hector Alejandro Ruiz-Moreno; Jhonnatn Reales-González; Jorge Rivera; Juan Camilo Martinez; Julian Naizaque; Katherine Laiton-Donato; Lisseth Pardo; Magdalena Wiesner; Marcela Mercado-Reyes; Maria T. Herrera-Sepúlveda; Marta Lopez Blanco; Martha Lucia Ospina Martinez; Paola Rojas; Sergio Gomez; Sheryll Corchuelo; Ángela Alarcon Cruz                                                                                                                                                                                                                                                                                                                                                  |
| EPI_ISL_2621177, EPI_ISL_2621178, EPI_ISL_2621180                                                                                                                                                                                                                                                                                                                                                                                                                                                                                                                                                                                                                                                                                                               | PRIME DIAGNOSTICS                                                                                                                                | Universidad Nacional de Colombia - Laboratorio Genómico One Health                                      | Andres F. Cardona-Rios; Carlos Franco-Muñoz; Carolina Muñoz-Arango; Celeny Ortiz; Daniel O. Maldonado-Perez; Diego A. Álvarez-Díaz; Hector Alejandro Ruiz-Moreno; Idabely Betancur Ortiz; Jorge E. Osorio; Juan P. Hernandez-Ortiz; Karl A Ciuderis; Katherine Laiton-Donato; Laura Silvana Perez; Lina M. Hurtado; Marcela Mercado-Reyes; Maria Angélica Maya; Maria Stella López; Rita Almanza Payares; Sandra Ines Cano; Simón Villegas Velásquez                                                                                                                                                                                                                                                                                                                                                           |
| EPI_ISL_2345796                                                                                                                                                                                                                                                                                                                                                                                                                                                                                                                                                                                                                                                                                                                                                 | PSF MARIA JOSE SALTO DE PIRAPORA                                                                                                                 | Instituto Butantan / Mendelics                                                                          | Antonio Jorge Martins; Claudia Renata dos Santos Barros; David Schlesinger; Debora Botequilo Moretti; Dimas Tadeu Covas; Elaine Cristina Marqueze; Elaine Vieira Santos; Evandra Strazza Rodrigues; Heidge Fukumasu; Jayme Augusto de Souza-Neto; José Salvatore Leister Patané; Luiz Alcantara; Luiz Lehmann Coutinho; Maria Carolina Elias; Maurício Lacerda Nogueira; Rafael dos Santos Bezerra; Raul Machado Neto; Rejane Maria Tommasini Grotto; Ricardo Haddad; Sandra Coccuzzo Sampaio Vessoni; Simone Kashima; Svetoslav Nanev Slavov; Vincent Louis Viala                                                                                                                                                                                                                                             |
| EPI_ISL_3076899                                                                                                                                                                                                                                                                                                                                                                                                                                                                                                                                                                                                                                                                                                                                                 | PZU "Eurofarm - Centar Poliklinika"                                                                                                              | University of Sarajevo, Veterinary Faculty, Laboratory for Molecular Diagnostic and Research Laboratory | Goletic S; Goletic T; Hodzic A.; Huseinbegovic E; Jazic A.; Nivicic M.; Prguda-Mujic J; Sabic E.; Softic A; Terzic I.                                                                                                                                                                                                                                                                                                                                                                                                                                                                                                                                                                                                                                                                                          |
| EPI_ISL_2241616, EPI_ISL_3453879                                                                                                                                                                                                                                                                                                                                                                                                                                                                                                                                                                                                                                                                                                                                | Palapye Primary Hospital Laboratory                                                                                                              | Botswana Harvard HIV Reference Laboratory                                                               | Boitumelo J.L Zuze; Boitumelo Zuze; Botshelo Radibe; David Lawrence; Dorcas Maruapula; Joseph Makheba; Keoratlile Ntshambiwa; Kwana Lechiile; Legodile Kooepile; Letsibogo Gaoraelwe; Madisa Mine; Modisa Motswaledi; Mosepele Mosepele; Ontlametse T. Bareng; Roger Shapiro; Shahin Lockman; Sikhulile Moyo; Sikhulile Wonderful T. Choga; Simani Gasetisiwe; Thela Tefelo; Thongbotho Mphoyakgosi; Wonderful T. Choga                                                                                                                                                                                                                                                                                                                                                                                        |
| EPI_ISL_596505, EPI_ISL_596509, EPI_ISL_596529                                                                                                                                                                                                                                                                                                                                                                                                                                                                                                                                                                                                                                                                                                                  | Palestinian Ministry of Health                                                                                                                   | Molecular Genetics Lab                                                                                  | Damien Richard; Dana Najjar; Francois Balloux; Hisham Darwish; Husam Sallam; Issa Shtayah; Lucy van Dorp; Mahmoud Ruzayqat; Nouar Qutob; Osama Najjar; Zaidoun Salah                                                                                                                                                                                                                                                                                                                                                                                                                                                                                                                                                                                                                                           |
| EPI_ISL_708185, EPI_ISL_708188                                                                                                                                                                                                                                                                                                                                                                                                                                                                                                                                                                                                                                                                                                                                  | Pamukkale University Hospital                                                                                                                    | Pamukkale University Department of Medical Genetics                                                     | Onur TOKGUN et al.                                                                                                                                                                                                                                                                                                                                                                                                                                                                                                                                                                                                                                                                                                                                                                                             |
| EPI_ISL_2634931                                                                                                                                                                                                                                                                                                                                                                                                                                                                                                                                                                                                                                                                                                                                                 | Pandemic Response Lab - NYC                                                                                                                      | Pandemic Response Lab, R&D                                                                              | Cybill del Castillo; Dylan Law; Haiping Hao; Henry Lee; Jon Laurent; Katharine Nelson; Melissa Hopkins; Michael Hammerling; Pradeep Bugga; Shinyoung Clair Kang; Sol Rey; William Ward                                                                                                                                                                                                                                                                                                                                                                                                                                                                                                                                                                                                                         |
| EPI_ISL_2802115                                                                                                                                                                                                                                                                                                                                                                                                                                                                                                                                                                                                                                                                                                                                                 | Parow                                                                                                                                            | NHLS/UCT                                                                                                | Arash Iranzadeh; Bruna Galvao; Carolyn Williamson; Deelan Doolabh; Diana Hardie; Gert Marais; Innocent Mudau; Lynn Tyers; Marvin Hsiao; Stephen Korsman                                                                                                                                                                                                                                                                                                                                                                                                                                                                                                                                                                                                                                                        |
| EPI_ISL_430845                                                                                                                                                                                                                                                                                                                                                                                                                                                                                                                                                                                                                                                                                                                                                  | Pasig City General Hospital                                                                                                                      | Research Institute for Tropical Medicine                                                                | Bautista; Brunker, K.; C.S.; C.T.; D.L.; Demetria; E.S.; F.G.M.; I.A.P.; Manalo; Medado; Mercado; O.J.T.; Onza; Polotan                                                                                                                                                                                                                                                                                                                                                                                                                                                                                                                                                                                                                                                                                        |
| EPI_ISL_2035941                                                                                                                                                                                                                                                                                                                                                                                                                                                                                                                                                                                                                                                                                                                                                 | Pasteur Institute - Laboratory of Clinical Virology                                                                                              | Pasteur Institute - Laboratory of Clinical Virology                                                     | Anissa Chouikha; Henda Triki; Kais Ghedira; Mariem Gdoura; Sondos Haddad; Wasfi Fares                                                                                                                                                                                                                                                                                                                                                                                                                                                                                                                                                                                                                                                                                                                          |
| EPI_ISL_456163, EPI_ISL_456194, EPI_ISL_456301, EPI_ISL_582019, EPI_ISL_622806, EPI_ISL_755626, EPI_ISL_3477099, EPI_ISL_3477100, EPI_ISL_3477101, EPI_ISL_3477102, EPI_ISL_3477103, EPI_ISL_3477104, EPI_ISL_3477105                                                                                                                                                                                                                                                                                                                                                                                                                                                                                                                                           | see above                                                                                                                                        | PathLab Bay of Plenty                                                                                   | Anja Werno; Antje van der Linden; Arlo Upton; Chris Mansell; David Hammer; Dragana Drinkovic; Erasmus Smit; Gary McAuliffe; Hana Sofia Andersson; Hermes Perez; James Ussher; Jill Sherwood; Jing Wang; Joep de Ligt; Josh Freeman; Julia Howard; Juliet Elvy; Lauren Jelly; Mary DeAlmeida; Matt Blakiston; Matt Storey; Matthew Rogers; Max Bloomfield; Michael Addidle; Michelle Balm; Muhammad Faisal; Nikki Freed; Olin Silander; Olivia Stroeven; Rachel Boyle; Sally Roberts; SallyAnn Harbison; Sarah Jefferies; Sharmini Muttaiyah; Susan Morpeth; Susan Taylor; Timothy Blackmore; Vani Sathyendran; Veronica Playle; Virginia Hope; Xiaoyun Ren                                                                                                                                                     |
| EPI_ISL_470851, EPI_ISL_2662451, EPI_ISL_2713075, EPI_ISL_2932263                                                                                                                                                                                                                                                                                                                                                                                                                                                                                                                                                                                                                                                                                               | PathWest Laboratory Medicine WA                                                                                                                  | PathWest Laboratory Medicine WA                                                                         | Avram Levy; Chisha Sikazwe; David Smith and David Speers; Jurissa Lang; PathWest Laboratory Medicine WA; PathWest Laboratory Medicine WA Microbial Surveillance Unit                                                                                                                                                                                                                                                                                                                                                                                                                                                                                                                                                                                                                                           |
| EPI_ISL_512720, EPI_ISL_512756, EPI_ISL_596717, EPI_ISL_596770, EPI_ISL_605852, EPI_ISL_672626, EPI_ISL_672637, EPI_ISL_708789, EPI_ISL_708796, EPI_ISL_794685, EPI_ISL_933799, EPI_ISL_1069392, EPI_ISL_1416321, EPI_ISL_1816920, EPI_ISL_1828699, EPI_ISL_1828700, EPI_ISL_1914666, EPI_ISL_1914668, EPI_ISL_1972908, EPI_ISL_1972909, EPI_ISL_1972912, EPI_ISL_2081529, EPI_ISL_2098723, EPI_ISL_2598297, EPI_ISL_2757655, EPI_ISL_2757656, EPI_ISL_2757657, EPI_ISL_2784344, EPI_ISL_2861270, EPI_ISL_2982303, EPI_ISL_3038898, EPI_ISL_3038899, EPI_ISL_3150198, EPI_ISL_3150199, EPI_ISL_3245746, EPI_ISL_3245750, EPI_ISL_3693292, EPI_ISL_3693297, EPI_ISL_3693300, EPI_ISL_3693302, EPI_ISL_3693306, EPI_ISL_3693308, EPI_ISL_3841993, EPI_ISL_3841994 | see above                                                                                                                                        | PathWest Laboratory Medicine WA Microbial Surveillance Unit                                             |                                                                                                                                                                                                                                                                                                                                                                                                                                                                                                                                                                                                                                                                                                                                                                                                                |
| EPI_ISL_2691707                                                                                                                                                                                                                                                                                                                                                                                                                                                                                                                                                                                                                                                                                                                                                 | PathWest Laboratory Medicine WA Microbial Surveillance Unit                                                                                      | PathWest Laboratory Medicine WA Microbial Surveillance Unit                                             | Hospital Ave; Nedlands WA 6009; QEII Medical Centre                                                                                                                                                                                                                                                                                                                                                                                                                                                                                                                                                                                                                                                                                                                                                            |
| EPI_ISL_591469, EPI_ISL_685295, EPI_ISL_686002, EPI_ISL_687301, EPI_ISL_691796, EPI_ISL_897331, EPI_ISL_898967, EPI_ISL_1131201, EPI_ISL_1426234, EPI_ISL_1429814, EPI_ISL_1430699, EPI_ISL_2337437, EPI_ISL_3192933, EPI_ISL_3193677, EPI_ISL_3194200                                                                                                                                                                                                                                                                                                                                                                                                                                                                                                          | see above                                                                                                                                        | Pathogen Genomics Center, National Institute                                                            | Kentaro Itokawa; Makoto Kuroda; Masanori Hashino; Rina Tanaka; Tsuyoshi Sekizuka                                                                                                                                                                                                                                                                                                                                                                                                                                                                                                                                                                                                                                                                                                                               |

|                                                                                                                                                                                                                                                                                                                                                                                                                                                                                                                                                                                                                                                                                                                                                   |                                                                                                            |                                                                                                                                 |                                                                                                                                                                                                                                                                                                                                                                                                                                                                                                                                                                                                                                                                                                                                                                                                                                                                                                                                              |
|---------------------------------------------------------------------------------------------------------------------------------------------------------------------------------------------------------------------------------------------------------------------------------------------------------------------------------------------------------------------------------------------------------------------------------------------------------------------------------------------------------------------------------------------------------------------------------------------------------------------------------------------------------------------------------------------------------------------------------------------------|------------------------------------------------------------------------------------------------------------|---------------------------------------------------------------------------------------------------------------------------------|----------------------------------------------------------------------------------------------------------------------------------------------------------------------------------------------------------------------------------------------------------------------------------------------------------------------------------------------------------------------------------------------------------------------------------------------------------------------------------------------------------------------------------------------------------------------------------------------------------------------------------------------------------------------------------------------------------------------------------------------------------------------------------------------------------------------------------------------------------------------------------------------------------------------------------------------|
| of Infectious Diseases                                                                                                                                                                                                                                                                                                                                                                                                                                                                                                                                                                                                                                                                                                                            |                                                                                                            | Infectious Diseases                                                                                                             |                                                                                                                                                                                                                                                                                                                                                                                                                                                                                                                                                                                                                                                                                                                                                                                                                                                                                                                                              |
| EPI_ISL_512920, EPI_ISL_512922, EPI_ISL_513055                                                                                                                                                                                                                                                                                                                                                                                                                                                                                                                                                                                                                                                                                                    | Pathogen Genomics Lab King Abdullah University of Science and Technology(KAUST)                            | Pathogen Genomics Lab King Abdullah University of Science and Technology(KAUST)                                                 | Abdulaziz Alahmadi; Afrah Alsomali; Ahmad Bakur Mahmoud; Amanda; Amanda Ooi; Amit Kumar Subudhi; Anwar Hashem; Arnab Pain; Asim Khogeer; Fadwa Alofi; Fathia Ben Rached; Jumana Taha; Khaled Alghithami; Luke; Luke Esau; Naif Almontashiri; Raeec Naeem; Rahul P Salunke; Sara Mfarrej; Sharif Hala                                                                                                                                                                                                                                                                                                                                                                                                                                                                                                                                                                                                                                         |
| EPI_ISL_407896, EPI_ISL_410717                                                                                                                                                                                                                                                                                                                                                                                                                                                                                                                                                                                                                                                                                                                    | Pathology Queensland                                                                                       | Public Health Virology Laboratory                                                                                               | Alyssa Pyke; Amanda De Jong; Andrew Van Den Hurk; Ben Huang; Carmel Taylor; David Warrirow; Doris Genge; Elisabeth Gamez; Glen Hewitson; Ian Maxwell Mackay; Inga Sultana; Jamie McMahon; Jean Barcelon; Judy Northill; Mitchell Finger; Natalie Simpson; Neelima Nair; Peter Burtonclay; Peter Moore; Sarah Wheatley; Sean Moody; Sonja Hall-Mendelin; Timothy Gardam; and Frederick Moore.                                                                                                                                                                                                                                                                                                                                                                                                                                                                                                                                                 |
| EPI_ISL_455061, EPI_ISL_593673                                                                                                                                                                                                                                                                                                                                                                                                                                                                                                                                                                                                                                                                                                                    | Pathology West - NSW Health Pathology                                                                      | NSW Health Pathology - Institute of Clinical Pathology and Medical Research; Westmead Hospital; University of Sydney            | CIDM-PH et al.                                                                                                                                                                                                                                                                                                                                                                                                                                                                                                                                                                                                                                                                                                                                                                                                                                                                                                                               |
| EPI_ISL_2433646                                                                                                                                                                                                                                                                                                                                                                                                                                                                                                                                                                                                                                                                                                                                   | Pattani Hoapital                                                                                           | Division of Genomic Medicine and Innovation support,Department of Medical Sciences, Ministry of Public Health, Thailand         | Archawin Rojanawiwat; Jirapha Pakdee; Natthakul Bunneang; Nuanjun Wichukchinda; Penpitcha Thawong; Pilailuk Akkapaiboon Okada; Pundharika Piboonsiri; Surakameth Mahasirimongkol; Waritta Sawaengdee                                                                                                                                                                                                                                                                                                                                                                                                                                                                                                                                                                                                                                                                                                                                         |
| EPI_ISL_3454057                                                                                                                                                                                                                                                                                                                                                                                                                                                                                                                                                                                                                                                                                                                                   | Perm Krai Blood Transfusion Station                                                                        | WHO National Influenza Centre Russian Federation                                                                                | Andrey Komissarov; Artem Fadeev; Daria Danilenko; Dmitry Lioznov; Elena Nabieva; Georgii Bazykin; Kirill Varchenko; Ksenia Safina; Kseniya Komissarova; Maria Pisareva; Mikhail Bakaev; Nikita Yolshin; Oula Mansour; Tamila Musaeva; Veronika Eder                                                                                                                                                                                                                                                                                                                                                                                                                                                                                                                                                                                                                                                                                          |
| EPI_ISL_853876                                                                                                                                                                                                                                                                                                                                                                                                                                                                                                                                                                                                                                                                                                                                    | Pharmgenetix GmbH                                                                                          | Berghthaler laboratory, CeMM Research Center for Molecular Medicine of the Austrian Academy of Sciences                         | Alexander Lercher; Alexandra Popa; Andreas Berghthaler; Anna Schedl; Benedikt Agerer; Christoph Bock; Jakob-Wendelin Genger; Jan Laine; Lukas Endler; Martin Senekowitsch; Michael Schuster; Thomas Penz                                                                                                                                                                                                                                                                                                                                                                                                                                                                                                                                                                                                                                                                                                                                     |
| EPI_ISL_2156159                                                                                                                                                                                                                                                                                                                                                                                                                                                                                                                                                                                                                                                                                                                                   | Philippine Airport Diagnostic Laboratory                                                                   | Philippine Genome Center                                                                                                        | Alethea R. de Guzman; Anna Ong-Lim; Arianne A. Zamora; Asia Louisa U. Chong; Benedict A. Maralit; Candice Francheska B. Tambaoan; Carlo M. Lapid; Celia Carlos; Devon Ray Pacial; Edsel Maurice Salvaña; El King D. Morado; Eva Maria Cutiongco-de la Paz; Francis A. Tablizo; Irish Coleen A. Asin; Jaime C. Montoya; Jan Michael C. Yap; Jo-Hannah S. Llamas; John Q. Wong; Joshua Gregor A. Dizon; Juan Antonio R. Magalang; Karol Sophia Agape R. Padilla; Kenneth M. Kim; Kris P. Punayan; Marc Edsel C. Ayes; Marc Jerrone R. Castro; Maria Rosario Singh-Vergeire and Cynthia P. Saloma; Maria Sofia L. Yangzon; Marissa Alejandria; Razel Nikka M. Hao; Rianna Patricia S. Cruz; Sheila Mae M. Araiza                                                                                                                                                                                                                                |
| EPI_ISL_2859170                                                                                                                                                                                                                                                                                                                                                                                                                                                                                                                                                                                                                                                                                                                                   | Philippine General Hospital (PGH)                                                                          | Philippine Genome Center                                                                                                        | Alethea R. de Guzman; Anna Ong-Lim; Arianne A. Zamora; Benedict A. Maralit; Carlo M. Lapid; Celia Carlos; Devon Ray Pacial; Diomedes A. Carino; Edsel Maurice Salvaña; El King D. Morado; Elcid Aaron R. Pangilinan; Eva Maria Cutiongco-de la Paz; Francis A. Tablizo; Henrietta Marie Rodriguez; Jaime C. Montoya; Jan Michael C. Yap; Jarvin E. Nipales; Jo-Hannah S. Llamas; John Q. Wong; Joshua Gregor A. Dizon; Juan Antonio R. Magalang; Karol Sophia Agape R. Padilla; Kenneth M. Kim; Kris P. Punayan; Krisitna Patriz Dela Cruz; Lindsay Claire D.L. Carandang; Ma. Exanil Planting; Marc Edsel C. Ayes; Maria Rosario Singh-Vergeire and Cynthia P. Saloma; Maria Sofia L. Yangzon; Marielle M Gamboa; Marissa Alejandria; Nina Francesca Bustamante; Razel Nikka M. Hao; Renato Jacinto Q. Mantaring; Rianna Patricia S. Cruz; Sheila Mae M. Araiza; Yvonne Valerie Austria; Zipporah Mariebelle R. Enriquez; Zyrel V. Mollejon |
| EPI_ISL_792022                                                                                                                                                                                                                                                                                                                                                                                                                                                                                                                                                                                                                                                                                                                                    | Plateforme COVID IDF                                                                                       | National Reference Center for Viruses of Respiratory Infections, Institut Pasteur, Paris                                        | Angela Brisebarre; Camille Capel; Etienne Simon-Lorière; Jacques Fourgeaud; Marion Barbet; Maud Vanpeene; Méline Bizard; Sylvie Behillili; Sylvie van der Werf; Vincent Enouf                                                                                                                                                                                                                                                                                                                                                                                                                                                                                                                                                                                                                                                                                                                                                                |
| EPI_ISL_2709213                                                                                                                                                                                                                                                                                                                                                                                                                                                                                                                                                                                                                                                                                                                                   | Poliklinika Muminovic                                                                                      | Alea Genetic Centre                                                                                                             | Dino Pecar; Ivana Ceko; Lana Salihefendic; Naida Mulahusejinovic; Rijad Konjhodzic; Selma Durgut                                                                                                                                                                                                                                                                                                                                                                                                                                                                                                                                                                                                                                                                                                                                                                                                                                             |
| EPI_ISL_2178953                                                                                                                                                                                                                                                                                                                                                                                                                                                                                                                                                                                                                                                                                                                                   | Praava Health                                                                                              | Child Health Research Foundation                                                                                                | CHRF Bangladesh Genomics Team; Shafuil Azam; Zaheed Husain                                                                                                                                                                                                                                                                                                                                                                                                                                                                                                                                                                                                                                                                                                                                                                                                                                                                                   |
| EPI_ISL_2265206                                                                                                                                                                                                                                                                                                                                                                                                                                                                                                                                                                                                                                                                                                                                   | Praxisgemeinschaft für Laboratoriumsmedizin Labor Blumenstraße; Praxis Dr. E. Wietschel & Dr. F. Wietschel | Robert Koch Institute                                                                                                           |                                                                                                                                                                                                                                                                                                                                                                                                                                                                                                                                                                                                                                                                                                                                                                                                                                                                                                                                              |
| EPI_ISL_2790397                                                                                                                                                                                                                                                                                                                                                                                                                                                                                                                                                                                                                                                                                                                                   | Primary Health Care Banja Luka                                                                             | Public Health Institute of Republic of Srpska                                                                                   | Branka Culibrk; Dijana Vukajlovic; Milica Celic; Pava Dimitrijevic; Stanka Tomic; Tatjana Markovic; Zeljka Sumic                                                                                                                                                                                                                                                                                                                                                                                                                                                                                                                                                                                                                                                                                                                                                                                                                             |
| EPI_ISL_1477046, EPI_ISL_3668635, EPI_ISL_3673671                                                                                                                                                                                                                                                                                                                                                                                                                                                                                                                                                                                                                                                                                                 | Private clinic of Biogen Med, Tashkent, Uzbekistan                                                         | Center of Genomics and bioinformatics, Bioinformatics laboratory                                                                | Abdurakhmon N Yusupov; Dilshod E Usmanov; Ibromkhim Y Abdurakhmonov; Ibromkhim Y Abdurakhmonov.; Khurshida A Ubaydullaeva; Mirzakamol S Ayubov; Muhammadjon H Mirzakhmedov; Shukhrat E Shermatov; Zabardast T Buriev                                                                                                                                                                                                                                                                                                                                                                                                                                                                                                                                                                                                                                                                                                                         |
| EPI_ISL_1469602                                                                                                                                                                                                                                                                                                                                                                                                                                                                                                                                                                                                                                                                                                                                   | Pronto Atendimento Campo Bom                                                                               | Epiclin                                                                                                                         | Ana Paula Mutterle; Carolina Comerlato; Eliana Márcia Da Ros Wendland; Fernando Hayashi Sant'Anna; Janira Prichula; Juliana Comerlato                                                                                                                                                                                                                                                                                                                                                                                                                                                                                                                                                                                                                                                                                                                                                                                                        |
| EPI_ISL_1017197                                                                                                                                                                                                                                                                                                                                                                                                                                                                                                                                                                                                                                                                                                                                   | Providence Alaska Medical Center                                                                           | Providence St. Joseph Health Molecular Genomics Laboratory                                                                      | Alexa K Dowdell; Brian D Piening; Carlo B Bifulco; Fred L Robinson; Mary Campbell                                                                                                                                                                                                                                                                                                                                                                                                                                                                                                                                                                                                                                                                                                                                                                                                                                                            |
| EPI_ISL_1968628                                                                                                                                                                                                                                                                                                                                                                                                                                                                                                                                                                                                                                                                                                                                   | Provincial Public Health Reference Laboratory                                                              | Provincial Public Health Reference Laboratory                                                                                   | ANDLEEB HANIF                                                                                                                                                                                                                                                                                                                                                                                                                                                                                                                                                                                                                                                                                                                                                                                                                                                                                                                                |
| EPI_ISL_1180691                                                                                                                                                                                                                                                                                                                                                                                                                                                                                                                                                                                                                                                                                                                                   | Public Health Authority of the Slovak Republic                                                             | Berghthaler laboratory, CeMM Research Center for Molecular Medicine of the Austrian Academy of Sciences                         | Andreas Berghthaler; Anna Schedl; Bekir Erguner; Benedikt Agerer; Christoph Bock; Fabian Amman; Jan Laine; Lukas Endler; Maelle Le Moing; Martin Senekowitsch; Michael Schuster; Thomas Penz                                                                                                                                                                                                                                                                                                                                                                                                                                                                                                                                                                                                                                                                                                                                                 |
| EPI_ISL_2497478, EPI_ISL_2657892, EPI_ISL_2688092, EPI_ISL_2844572, EPI_ISL_3117967, EPI_ISL_3229349, EPI_ISL_3229374, EPI_ISL_3452619                                                                                                                                                                                                                                                                                                                                                                                                                                                                                                                                                                                                            | see above                                                                                                  | Public Health Authority of the Slovak Republic                                                                                  | Anna Gičová; Diana Rušňáková; Jakub Styk; Jaroslav Budiš; Miroslav Böhmer; Tatiana Sedláčková; Tomáš Szemes                                                                                                                                                                                                                                                                                                                                                                                                                                                                                                                                                                                                                                                                                                                                                                                                                                  |
| EPI_ISL_2965748                                                                                                                                                                                                                                                                                                                                                                                                                                                                                                                                                                                                                                                                                                                                   | Public Health Authority of the Slovak Republic                                                             | Public Health Authority of the Slovak Republic                                                                                  | Anna Gičová; Barbora Kotvasová; Elena Tichá; Lucia Ševčíková; Miroslav Böhmer; Pavol Mišenko; Terézia Vrabľová; Tomáš Szemes                                                                                                                                                                                                                                                                                                                                                                                                                                                                                                                                                                                                                                                                                                                                                                                                                 |
| EPI_ISL_1312062                                                                                                                                                                                                                                                                                                                                                                                                                                                                                                                                                                                                                                                                                                                                   | Public Health Institute of Varaždin County                                                                 | Croatian Institute of Public Health                                                                                             | Irena Tabain; Ivana Ferencák                                                                                                                                                                                                                                                                                                                                                                                                                                                                                                                                                                                                                                                                                                                                                                                                                                                                                                                 |
| EPI_ISL_2697794                                                                                                                                                                                                                                                                                                                                                                                                                                                                                                                                                                                                                                                                                                                                   | Public Health Laboratory, Minnesota Department of Health                                                   | University of Minnesota Genomics Center                                                                                         | Corbin Dirks; Daryl M. Gohl; Jaquelyn Kuriger-Laber; John Garbe; and Sean Wang                                                                                                                                                                                                                                                                                                                                                                                                                                                                                                                                                                                                                                                                                                                                                                                                                                                               |
| EPI_ISL_2860640, EPI_ISL_2860642, EPI_ISL_2860643, EPI_ISL_2860644, EPI_ISL_2860645, EPI_ISL_2860647                                                                                                                                                                                                                                                                                                                                                                                                                                                                                                                                                                                                                                              | Public Health Reference Laboratory                                                                         | Erasmus Medical Center                                                                                                          | Anne van der Linden; Annemiek van der Eijk; Bas Oude Munnink; Corine GeurtsvanKessel; David Nieuwenhuijse; Emmanuelle Munger; Irina Chestakova; Marion Koopmans; Marjan Boter; Omar Elahmer-Abdulla Bashein- Rahma Algeriani-Ahlam Alarif; Reina Sikkema; Richard Molenkamp; on behalf of the Dutch national COVID-19 response team.                                                                                                                                                                                                                                                                                                                                                                                                                                                                                                                                                                                                         |
| EPI_ISL_3826755                                                                                                                                                                                                                                                                                                                                                                                                                                                                                                                                                                                                                                                                                                                                   | Public Health Service Center 13 Maitree Vanich                                                             | Division of Genomic Medicine and Innovation support,Department of Medical Sciences, Ministry of Public Health, Thailand         | Archawin Rojanawiwat; Jirapha Pakdee; Natthakul Bunneang; Nuanjun Wichukchinda; Penpitcha Thawong; Pilailuk Akkapaiboon Okada; Pundharika Piboonsiri; Surakameth Mahasirimongkol; Waritta Sawaengdee                                                                                                                                                                                                                                                                                                                                                                                                                                                                                                                                                                                                                                                                                                                                         |
| EPI_ISL_1098645, EPI_ISL_1910858                                                                                                                                                                                                                                                                                                                                                                                                                                                                                                                                                                                                                                                                                                                  | Public Health Virology-Forensic and Scientific Services                                                    | Public Health Virology-Forensic and Scientific Services                                                                         | Son Nguyen                                                                                                                                                                                                                                                                                                                                                                                                                                                                                                                                                                                                                                                                                                                                                                                                                                                                                                                                   |
| EPI_ISL_1495246                                                                                                                                                                                                                                                                                                                                                                                                                                                                                                                                                                                                                                                                                                                                   | Public Health Authority of the Slovak Republic                                                             | Berghthaler laboratory, CeMM Research Center for Molecular Medicine of the Austrian Academy of Sciences                         | Andreas Berghthaler; Anna Schedl; Bekir Erguner; Benedikt Agerer; Christoph Bock; Fabian Amman; Jan Laine; Lukas Endler; Maelle Le Moing; Martin Senekowitsch; Michael Schuster; Petr Triska; Thomas Penz                                                                                                                                                                                                                                                                                                                                                                                                                                                                                                                                                                                                                                                                                                                                    |
| EPI_ISL_434547                                                                                                                                                                                                                                                                                                                                                                                                                                                                                                                                                                                                                                                                                                                                    | Puerto Rico Department of Health                                                                           | Centers for Disease Control and Prevention, Dengue Branch                                                                       | Betzabel Flores; Chaney Kalinich; Fabiola Cruz; Gilberto A. Santiago; Glenda Gonzalez; Jessica I. Falcon; Jorge L. Munoz-Jordan; Joseph Fauver; Keyla Charriez; Nathan Grubaugh                                                                                                                                                                                                                                                                                                                                                                                                                                                                                                                                                                                                                                                                                                                                                              |
| EPI_ISL_3401884                                                                                                                                                                                                                                                                                                                                                                                                                                                                                                                                                                                                                                                                                                                                   | Puskesmas Kecamatan Tanjung Priok                                                                          | Genomik Solidaritas Indonesia Laboratorium                                                                                      | Ahrahayati Wildany; Annisa Muthiah Sukirman; Anuraj Shankar; Ariel Pradipta; Carissa Sintca Wijaya; Dhahlia Agustina Cahyono; Dwi Oktavia; Gracia Felias Enos Korpomis; Himawan Masyhuri; Louisa Markus; Meutia Ayuputeri Kumaheri; Ngabila Salama; Tiranti Vindha; Vania Gavrila Wikasa                                                                                                                                                                                                                                                                                                                                                                                                                                                                                                                                                                                                                                                     |
| EPI_ISL_2918642                                                                                                                                                                                                                                                                                                                                                                                                                                                                                                                                                                                                                                                                                                                                   | Puskesmas Rancamanyar                                                                                      | Eijkman Institute for Molecular Biology, National Research and Innovation Agency; West Java Health Laboratory                   | Amin Soebandrio; Azzania Fibriani; Cut Nur Cinthia Alamanda; Edison Johar; Ema Rahmawati; Frilasita A Yudhaputri; Hidayat Trimarsanto; Iskandar Adnan; Khin Saw Myint; Lidwina Priliiani; Lydia V. Panggalo; Muhammad Rezki Rasyak; Rifky Waluyajati Rachman; Ryan Bayusantika Ristandi; Safarina G Malik; Sukma Oktavianthi; Willy Agustine                                                                                                                                                                                                                                                                                                                                                                                                                                                                                                                                                                                                 |
| EPI_ISL_1055513                                                                                                                                                                                                                                                                                                                                                                                                                                                                                                                                                                                                                                                                                                                                   | QElI Health Sciences Centre                                                                                | National Microbiology Laboratory (NML)                                                                                          | Anna Majer; Anneliese Landgraff; CanCOGE'N's metadata curation team; Dan Gaston; Darian Hole; Elsie Grudeski; Gary Van Domselaar; Grace Seo; Janice Pettipas; Jason LeBlanc; Jennifer Tanner; Kirsten Biggar; Madison Chapel; Morag Graham; Natalie Knox; Nathalie Bastien; Philip Mabon; Public Health Agency of Canada CanCOGE'N team; Rhannon Huzarewicz; Russell Mandes; Shari Tyson; Timothy Booth; Todd Hatchette; Yan Li                                                                                                                                                                                                                                                                                                                                                                                                                                                                                                              |
| EPI_ISL_2615848                                                                                                                                                                                                                                                                                                                                                                                                                                                                                                                                                                                                                                                                                                                                   | QLabs                                                                                                      | WVU and Marshall University Combined Genomics Core Facilities                                                                   | James Denvir; Peter Perrotta; Peter Stoilov; Ryan Percifield; Wesley Kimble                                                                                                                                                                                                                                                                                                                                                                                                                                                                                                                                                                                                                                                                                                                                                                                                                                                                  |
| EPI_ISL_576132, EPI_ISL_593645, EPI_ISL_693269, EPI_ISL_693282, EPI_ISL_849671, EPI_ISL_849692, EPI_ISL_849694, EPI_ISL_849754, EPI_ISL_1300531, EPI_ISL_1424003, EPI_ISL_1910856, EPI_ISL_2001059, EPI_ISL_2137032, EPI_ISL_2137035, EPI_ISL_2137036, EPI_ISL_2274247, EPI_ISL_2274248, EPI_ISL_2274249, EPI_ISL_2507084, EPI_ISL_2507095, EPI_ISL_2603822, EPI_ISL_2661521, EPI_ISL_2661524, EPI_ISL_2675252, EPI_ISL_2811889, EPI_ISL_2811890, EPI_ISL_2811893, EPI_ISL_2993397, EPI_ISL_3011178, EPI_ISL_3049194, EPI_ISL_3161826, EPI_ISL_3161830, EPI_ISL_3161839, EPI_ISL_3161841, EPI_ISL_3161842, EPI_ISL_3247188, EPI_ISL_3247209, EPI_ISL_3247215, EPI_ISL_3247228, EPI_ISL_3333212, EPI_ISL_3333214, EPI_ISL_3333216, EPI_ISL_3333231 | Queensland Health Forensic and Scientific Services                                                         | Chenwei Wang on behalf of Q-PHIRE Genomics; Q-PHIRE Genomics; Son Nguyen; Son Nguyen et al; Son Nguyen et al.                   |                                                                                                                                                                                                                                                                                                                                                                                                                                                                                                                                                                                                                                                                                                                                                                                                                                                                                                                                              |
| EPI_ISL_530232, EPI_ISL_530252                                                                                                                                                                                                                                                                                                                                                                                                                                                                                                                                                                                                                                                                                                                    | Queensland Health Forensic and Scientific Services, Public Health Virology                                 | Public Health Virology Laboratory, Forensic and Scientific Services, Queensland Health                                          | Son Nguyen et al                                                                                                                                                                                                                                                                                                                                                                                                                                                                                                                                                                                                                                                                                                                                                                                                                                                                                                                             |
| EPI_ISL_1424816                                                                                                                                                                                                                                                                                                                                                                                                                                                                                                                                                                                                                                                                                                                                   | Queensland Medical Laboratories                                                                            | Melbourne Diagnostic Unit Public Health Laboratory (MDU-PHL)                                                                    | N.L.; Palou, T.; Seemann, T.; Sherry; Vaccher, S.                                                                                                                                                                                                                                                                                                                                                                                                                                                                                                                                                                                                                                                                                                                                                                                                                                                                                            |
| EPI_ISL_1424519                                                                                                                                                                                                                                                                                                                                                                                                                                                                                                                                                                                                                                                                                                                                   | Queensland Medical Laboratories                                                                            | Victorian Infectious Diseases Reference Laboratory (VIDRL) and the Melbourne Diagnostic Unit Public Health Laboratory (MDU-PHL) | N.L.; Palou, T.; Seemann, T.; Sherry; Vaccher, S.                                                                                                                                                                                                                                                                                                                                                                                                                                                                                                                                                                                                                                                                                                                                                                                                                                                                                            |
| EPI_ISL_571527, EPI_ISL_571551, EPI_ISL_604231, EPI_ISL_937067                                                                                                                                                                                                                                                                                                                                                                                                                                                                                                                                                                                                                                                                                    | Quest Diagnostics                                                                                          | Quest Diagnostics                                                                                                               | Anderson, B.; D.F.; Gerasimova, A.; Grover, D.; Hua, M.; K.E.; Kagan; Lacbawan, F.; Liu Y.; Livingston; Owen, R.; R.M.; Rosenthal; S.H.; Shalhout                                                                                                                                                                                                                                                                                                                                                                                                                                                                                                                                                                                                                                                                                                                                                                                            |
| EPI_ISL_1193694, EPI_ISL_1267222, EPI_ISL_1552330, EPI_ISL_2133768, EPI_ISL_2143015, EPI_ISL_2203892, EPI_ISL_2247317, EPI_ISL_2268458, EPI_ISL_2367831, EPI_ISL_2371770, EPI_ISL_2599691, EPI_ISL_2652279, EPI_ISL_2869008, EPI_ISL_2869532, EPI_ISL_2871151, EPI_ISL_2874485, EPI_ISL_2874557, EPI_ISL_2876883, EPI_ISL_2930265, EPI_ISL_3018772, EPI_ISL_3114334, EPI_ISL_3114731, EPI_ISL_3353026, EPI_ISL_3395610, EPI_ISL_3395993, EPI_ISL_3396787, EPI_ISL_3396958                                                                                                                                                                                                                                                                         | Quest Diagnostics Incorporated                                                                             | Centers for Disease Control and Prevention Division of Viral Diseases, Pathogen Discovery                                       | A. Gerasimova; A. Perez; Adrian Paskey; B. Anderson; Ben L. Rambo-Martin; Benjamin Rambo-Martin; Christopher Gulvick; Clinton R. Paden; Dakota Howard; Darlene Wagner; Dhwani Batra; Duncan MacCannell; F. Lacbawan; I. A. Shlyakhter; Jason Caravas; K.E. Livingston; Kara Moser; L.E. Bernstein; M. Hua; Matthew Schmeerer; P. Tanpaiboon; Peter W. Cook; R. M. Kagan; R. Owen; R. V. Rolando; S. H. Rosenthal; Scott Sammons; Shatavia Morrison; Suxiang Tong; Y. Liu; Yvette Unoarumhi                                                                                                                                                                                                                                                                                                                                                                                                                                                   |

|                                                                                                                                                                                                                                                                                                                                                                                                                                                                                                                                                                                                                                                                                                                                                                  |                                                                                                                         |                                                                                                                                                                                                                                                                          |                                                                                                                                                                                                                                                                                                                                                                                                                                                                                                                                                                                                                                                                                                               |
|------------------------------------------------------------------------------------------------------------------------------------------------------------------------------------------------------------------------------------------------------------------------------------------------------------------------------------------------------------------------------------------------------------------------------------------------------------------------------------------------------------------------------------------------------------------------------------------------------------------------------------------------------------------------------------------------------------------------------------------------------------------|-------------------------------------------------------------------------------------------------------------------------|--------------------------------------------------------------------------------------------------------------------------------------------------------------------------------------------------------------------------------------------------------------------------|---------------------------------------------------------------------------------------------------------------------------------------------------------------------------------------------------------------------------------------------------------------------------------------------------------------------------------------------------------------------------------------------------------------------------------------------------------------------------------------------------------------------------------------------------------------------------------------------------------------------------------------------------------------------------------------------------------------|
| EPI_ISL_415641, EPI_ISL_415644                                                                                                                                                                                                                                                                                                                                                                                                                                                                                                                                                                                                                                                                                                                                   | R. G. Lugar Center for Public Health Research, National Center for Disease Control and Public Health (NCDC) of Georgia. | R. G. Lugar Center for Public Health Research, National Center for Disease Control and Public Health (NCDC) of Georgia.                                                                                                                                                  | Adam Kotorashvili; Amiran Gamkrelidze.; Ana Pakkiauri; Ann Machabishvili; Anna Kasradze; Davit Tsaguria; Ekaterine Khmaladze; Ekaterine Zangaladze; Ekaterine Zhgenti; Giorgi Tomashvili; Gvantsa Brachveli; Gvantsa Chanturia; Irma Burjanadze; Ketevan Sidamondize; Khatuna Zakhshvili; Lela Sabadze; Lela Urushadze; Magda Dgebuadze; Maia Alkhaszhvili; Mari Gavashelidze; Mariam Zakalashvili; Marine Murtskhvaladze; Meri Pantaulaia; Nato Kotaria; Nino Berishvili; Paata Imnadze; Roena Sukhlishvili; Tamar Jashlishvili; Tata Imnadze; Tea Teyvdoradze                                                                                                                                               |
| EPI_ISL_455783                                                                                                                                                                                                                                                                                                                                                                                                                                                                                                                                                                                                                                                                                                                                                   | REGIONAL VRDL,ICMR-RMRC BBSR                                                                                            | Immunogenomics lab, Institute of Life Sciences, Bhubaneswar                                                                                                                                                                                                              | Ajay Parida; Arup Ghosh; Atimukta Jha; COVID-19 team of ILS & RMRC; DBT's PAN-INDIA 1000 SARS-CoV2 RNA genome sequencing consortium; Debdutta Bhattacharya; Gulam Hussain Syed; Jaya Singh Khastri; Jyotirmayee Turuk; Manasi Priyadarshini; Orissa COVID-19 study group; Punit Prasad; Rajeeb Swain; Rupesh Dash; Sanghamitra Pati; Shanti Senapati; Shuchi Smita; Soma Chattopadhyay; Sunil Raghav; Swati Madhulika; Tushar K. Beuria; Viplov K. Biswas                                                                                                                                                                                                                                                     |
| EPI_ISL_2373835                                                                                                                                                                                                                                                                                                                                                                                                                                                                                                                                                                                                                                                                                                                                                  | REUNILAB                                                                                                                | CNR Virus des Infections Respiratoires - France SUD                                                                                                                                                                                                                      | Antonin Bal; Bruno Lina; Gregory Destras; Gwendolyne Burfin; Hadrien Regue; Laurence Josset; Martine Valette; Quentin Semanas                                                                                                                                                                                                                                                                                                                                                                                                                                                                                                                                                                                 |
| EPI_ISL_3130604                                                                                                                                                                                                                                                                                                                                                                                                                                                                                                                                                                                                                                                                                                                                                  | REUNILAB ST PAUL                                                                                                        | CNR Virus des Infections Respiratoires - France SUD                                                                                                                                                                                                                      | Antonin Bal; Bruno Lina; Gregory Destras; Gwendolyne Burfin; Hadrien Regue; Laurence Josset; Martine Valette; Quentin Semanas                                                                                                                                                                                                                                                                                                                                                                                                                                                                                                                                                                                 |
| EPI_ISL_419553                                                                                                                                                                                                                                                                                                                                                                                                                                                                                                                                                                                                                                                                                                                                                   | RI State Health Laboratories                                                                                            | Pathogen Discovery, Respiratory Viruses Branch, Division of Viral Diseases, Centers for Disease Control and Prevention                                                                                                                                                   | Anna Uehara; Clinton R. Paden; Haibin Wang; Jasmine Padilla; Jing Zhang; Justin Lee; Krista Queen; Suxiang Tong; Yan Li; Ying Tao                                                                                                                                                                                                                                                                                                                                                                                                                                                                                                                                                                             |
| EPI_ISL_2273060, EPI_ISL_2454664, EPI_ISL_3451454                                                                                                                                                                                                                                                                                                                                                                                                                                                                                                                                                                                                                                                                                                                | ROB FERREIRA LABORATORY                                                                                                 | National Institute for Communicable Diseases of the National Health Laboratory Service                                                                                                                                                                                   | Amoako DG; Bhiman JN; Everatt J; Ismail A; Mahlangu B; Mnguni A; Mohale T; Ntuli N; Scheepers C                                                                                                                                                                                                                                                                                                                                                                                                                                                                                                                                                                                                               |
| EPI_ISL_2844827                                                                                                                                                                                                                                                                                                                                                                                                                                                                                                                                                                                                                                                                                                                                                  | RS PMI, Bogor, West Java                                                                                                | Biosafety Level-3 Laboratory, Indonesian Institute of Sciences (LIPI)                                                                                                                                                                                                    | Anggia Prasetyoputri; Erwin F. Hasrianda; Fahrurrozi; Herjuno A. Nugroho; Nova D. Yanthi; Wien Kusharyoto                                                                                                                                                                                                                                                                                                                                                                                                                                                                                                                                                                                                     |
| EPI_ISL_888986                                                                                                                                                                                                                                                                                                                                                                                                                                                                                                                                                                                                                                                                                                                                                   | RSU Bhakti Kartini                                                                                                      | Eijkman Institute for Molecular Biology, Ministry of Research and Technology/National Agency for Research and Innovation                                                                                                                                                 | Amin Soebandrio; Edison Johar; Filasita A Yudhaputri; Hidayat Trimarsanto; Iskandar Adnan; Khin Saw Myint; Lydia V. Panggalo; Safarina G Malik; Sukma Oktavianthi; Willy Agustine                                                                                                                                                                                                                                                                                                                                                                                                                                                                                                                             |
| EPI_ISL_2258213                                                                                                                                                                                                                                                                                                                                                                                                                                                                                                                                                                                                                                                                                                                                                  | RSUD Arifin Ahmad Riau                                                                                                  | National Institute of Health Research and Development                                                                                                                                                                                                                    | Arie Ardiansyah Nugraha; Fajri Marinda; Hana Apsari Pawestri; Hartanti Dian Ikawati; Kartika Dewi Puspa; Krisna Pangesti; Nelly Puspandari; Subangkit; Triyani Soekarso; Vivi Setiawaty                                                                                                                                                                                                                                                                                                                                                                                                                                                                                                                       |
| EPI_ISL_791986                                                                                                                                                                                                                                                                                                                                                                                                                                                                                                                                                                                                                                                                                                                                                   | RSUD Morotai Maluku Utara                                                                                               | National Institute of Health Research and Development                                                                                                                                                                                                                    | AA; Denggo; HA; HD; Ikawati; KD; KNA; N; Nugraha; Pangesti; Pawestri; Puspa; Puspandari; SD; Setiawaty; Soekarso; Subangkit; T; V                                                                                                                                                                                                                                                                                                                                                                                                                                                                                                                                                                             |
| EPI_ISL_3230241                                                                                                                                                                                                                                                                                                                                                                                                                                                                                                                                                                                                                                                                                                                                                  | RSUP FATMAWATI / DINAS KESEHATAN DKI JAKARTA                                                                            | Genomik Solidaritas Indonesia Laboratorium                                                                                                                                                                                                                               | Annisia Muthiah Sukirman; Anuraj Shankar; Ariel Pradipta; Carissa Sintca Wijaya; Gracia Felias Enos Korompis; Jerry; Lidya Utami; Loli Simajuntak; Meutia Ayuputeri Kumaheri; Reinhart Gabriel; Vania Gavriila Wikasa                                                                                                                                                                                                                                                                                                                                                                                                                                                                                         |
| EPI_ISL_768616                                                                                                                                                                                                                                                                                                                                                                                                                                                                                                                                                                                                                                                                                                                                                   | Rajavithi Hospital                                                                                                      | National Institute of Health, Department of Medical Sciences, Ministry of Public Health, Thailand                                                                                                                                                                        | ; Natchaya Khiahsang; Pakorn Piromtong; Pilailuk Okada; Ratana Tacharoenmuang; Siripaporn Phuynun; Sittiporn Parmnen; Sunthareeya Waicharoen; Thanutsapa Thanadachakul; Warawan Wongboot; sirikanda wimol                                                                                                                                                                                                                                                                                                                                                                                                                                                                                                     |
| EPI_ISL_2348644                                                                                                                                                                                                                                                                                                                                                                                                                                                                                                                                                                                                                                                                                                                                                  | Rakai Health Sciences Program                                                                                           | MRC/UVRI & LSHTM Uganda Research Unit                                                                                                                                                                                                                                    | Charles Ssuuna; Dan Lule Bugembe; Matthew Cotten; My V.T. Phan; Pontiano Kaleebu; Ronald Moses Galiwango; Steven J Reynolds                                                                                                                                                                                                                                                                                                                                                                                                                                                                                                                                                                                   |
| EPI_ISL_447029, EPI_ISL_3152924                                                                                                                                                                                                                                                                                                                                                                                                                                                                                                                                                                                                                                                                                                                                  | Ramathibodi Hospital                                                                                                    | COVID-19 Network Investigations (CONI) Alliance                                                                                                                                                                                                                          | Angkana Huang; Anthony R. Jones; Arporn Wangwiwatsin; Bhakbhoon Panthan; Chonticha Klungtong; Duangkamon Loesbanluechai; Ekawat Pasomsub; Elizabeth Batty; Insee Sensorn; Janjira Thaipadungpanit; Khajohn Joonlasak; Khajohn Joonalak; Kingkan Rakmanee; Krittikorn Kumpornsin; Namfon Kotanan; Stefan Fernandez; Thanat Chookajorn; Theerarat Kochakarn; Treewat Watthanachockchai; Wasun Chantratita; Wudtichai Manasatienkij                                                                                                                                                                                                                                                                              |
| EPI_ISL_2000576                                                                                                                                                                                                                                                                                                                                                                                                                                                                                                                                                                                                                                                                                                                                                  | Rami Kantor lab                                                                                                         | Rami Kantor lab                                                                                                                                                                                                                                                          | Ewa King; Josephine Darpolor; Mark Howison; Rami Kantor; Richard Huard; Vlad Novitsky                                                                                                                                                                                                                                                                                                                                                                                                                                                                                                                                                                                                                         |
| EPI_ISL_2157585                                                                                                                                                                                                                                                                                                                                                                                                                                                                                                                                                                                                                                                                                                                                                  | Red - Regional de Vigilancia Genómica del COVID-19                                                                      | Laboratory of Respiratory Viruses and Measles, Oswaldo Cruz Institute, FIOCRUZ                                                                                                                                                                                           | Alice Sampaio Rocha; Ana Carolina Mendonca; Anna Carolina Paixao; Claudia Díaz; Eliisa Cavalcante Pereira; Fernando Motta; Luciana Appolinario; Marilda Siqueira on behalf of the Fiocruz COVID-19 Genomic Surveillance Network; Mitzi Castro; Paola Resende; Renata Serrano Lopes; Sandra Paola Paz; Taina Venas                                                                                                                                                                                                                                                                                                                                                                                             |
| EPI_ISL_2433442                                                                                                                                                                                                                                                                                                                                                                                                                                                                                                                                                                                                                                                                                                                                                  | Regional Medical Science Center 2 Phitsanulok                                                                           | Division of Genomic Medicine and Innovation support,Department of Medical Sciences, Ministry of Public Health, Thailand                                                                                                                                                  | Archawin Rojanawiwat; Jirapha Pakdee; Natthakul Bunneang; Nuanjun Wichukchinda; Penpitha Thawong; Pilailuk Akkapaiboon Okada; Pundharika Piboonsiri; Surakameth Mahasirimongkol; Waritta Sawaengdee                                                                                                                                                                                                                                                                                                                                                                                                                                                                                                           |
| EPI_ISL_3797055                                                                                                                                                                                                                                                                                                                                                                                                                                                                                                                                                                                                                                                                                                                                                  | Regional Medical Sciences Center 12 Songkhla                                                                            | National Institute of Health, Department of Medical Sciences, Ministry of Public Health, Thailand                                                                                                                                                                        | Archawin Rojanawiwat; Natchaya Khiahsang; Nuttida Thongpramul; Pakorn Piromtong; Pilailuk Okada; Ratana Tacharoenmuang; Siripaporn Phuynun; Sittiporn Parmnen; Sunthareeya Waicharoen; Thanutsapa Thanadachakul; Warawan Wongboot; sirikanda wimol                                                                                                                                                                                                                                                                                                                                                                                                                                                            |
| EPI_ISL_3342069                                                                                                                                                                                                                                                                                                                                                                                                                                                                                                                                                                                                                                                                                                                                                  | Regional Medical Sciences Center 8 Udonthani                                                                            | National Institute of Health, Department of Medical Sciences, Ministry of Public Health, Thailand                                                                                                                                                                        | ; Natchaya Khiahsang; Nuttida Thongpramul; Pakorn Piromtong; Pilailuk Okada; Ratana Tacharoenmuang; Siripaporn Phuynun; Sittiporn Parmnen; Sunthareeya Waicharoen; Thanutsapa Thanadachakul; Warawan Wongboot; sirikanda wimol                                                                                                                                                                                                                                                                                                                                                                                                                                                                                |
| EPI_ISL_708804, EPI_ISL_708806, EPI_ISL_708807                                                                                                                                                                                                                                                                                                                                                                                                                                                                                                                                                                                                                                                                                                                   | Regional medical sciences center 6 chonburi                                                                             | National Institute of Health, Department of Medical Sciences, Ministry of Public Health, Thailand                                                                                                                                                                        | Malinee Chittaganpitch; Pakorn Piromtong; Pilailuk Okada; Siripaporn Phuynun; Sittiporn Parmnen; Sunthareeya Waicharoen; Thanutsapa Thanadachakul; Warawan Wongboot                                                                                                                                                                                                                                                                                                                                                                                                                                                                                                                                           |
| EPI_ISL_3122992, EPI_ISL_3122996, EPI_ISL_3122998                                                                                                                                                                                                                                                                                                                                                                                                                                                                                                                                                                                                                                                                                                                | Republican Children's Clinical Infectious Diseases Hospital                                                             | WHO National Influenza Centre Russian Federation                                                                                                                                                                                                                         | Alexey Masharsky; Andrey Komissarov; Artem Fadeev; Daria Danilenko; Dmitry Lioznov; Elena Nabieva; Georgii Bazykin; Kirill Varchenko; Ksenia Safina; Kseniya Komissarova; Maria Baturova; Maria Pisareva; Mikhail Bakaev; Nikita Yolshin; Oula Mansour; Tamila Musaeva; Veronika Eder                                                                                                                                                                                                                                                                                                                                                                                                                         |
| EPI_ISL_491474                                                                                                                                                                                                                                                                                                                                                                                                                                                                                                                                                                                                                                                                                                                                                   | Research Institute for Tropical Medicine                                                                                | Research Institute for Tropical Medicine                                                                                                                                                                                                                                 | Catalino Demetria; Criselda Bautista; Daria Manalo; Edelwisa Mercado; Francisco Gerardo Polotan; Inez Andrea Medado; Kirstyn Brunker; Ma. Angelica Tujan; Othoniel Jan Onza                                                                                                                                                                                                                                                                                                                                                                                                                                                                                                                                   |
| EPI_ISL_2154909                                                                                                                                                                                                                                                                                                                                                                                                                                                                                                                                                                                                                                                                                                                                                  | Research Institute for Tropical Medicine, Inc. (RITM)                                                                   | Philippine Genome Center                                                                                                                                                                                                                                                 | Alethea R. de Guzman; Anna Ong-Lim; Arianne A. Zamora; Asia Louisa U. Chong; Benedict A. Maralit; Candice Francheska B. Tambaon; Carlo M. Lapid; Celia Carlos; Devon Ray Pacial; Edsel Maurice Salvaña; El King D. Morado; Eva Maria Cutiongco-de la Paz; Francis A. Tablizo; Irish Coleen A. Asin; Jaime C. Montoya; Jan Michael C. Yap; Jo-Hannah S. Llames; John Q. Wong; Joshua Gregor A. Dizon; Juan Antonio R. Magalang; Karol Sophia Agape R. Padilla; Kenneth M. Kim; Kris P. Punayan; Marc Edsel C. Ayres; Marc Jerrone R. Castro; Maria Rosario Singh-Vergeire and Cynthia P. Saloma; Maria Sofia L. Yangzon; Marissa Alejandria; Razel Nikka M. Hao; Rianna Patricia S. Cruz; Sheila Mae M. Araiza |
| EPI_ISL_2544708, EPI_ISL_2544712                                                                                                                                                                                                                                                                                                                                                                                                                                                                                                                                                                                                                                                                                                                                 | Research Center for Emerging Viral Infections, Chang Gung University, Taiwan                                            | Research Center for Emerging Viral Infections, Chang Gung University, Taiwan                                                                                                                                                                                             | Carol Wang; Chung-Guei Huang; Hsiao-Chen Tu; Hui-Ying Weng; Hung-Yu Shu; Jason Su; Jora Lin; Kuo-Ming Lee; Po-Wei Huang; Pocky Lai; Shih-Feng Tsai; Shin-Ru Shih; Shu-Li Yang; Tsu-Lan Wu; Yu-Nong Gong; Yung-Feng Lin                                                                                                                                                                                                                                                                                                                                                                                                                                                                                        |
| EPI_ISL_2737733, EPI_ISL_2737737                                                                                                                                                                                                                                                                                                                                                                                                                                                                                                                                                                                                                                                                                                                                 | Respiratory Virus Unit, Microbiology Services Colindale, Public Health England                                          | COVID-19 Genomics UK (COG-UK) Consortium                                                                                                                                                                                                                                 | PHE Covid Sequencing Team                                                                                                                                                                                                                                                                                                                                                                                                                                                                                                                                                                                                                                                                                     |
| EPI_ISL_747099, EPI_ISL_747132                                                                                                                                                                                                                                                                                                                                                                                                                                                                                                                                                                                                                                                                                                                                   | Respiratory Viruses Branch, Centers for Disease Control and Prevention                                                  | Respiratory Viruses Branch, Centers for Disease Control and Prevention                                                                                                                                                                                                   | C.R.; Cook; Lee, J.; Li, Y.; Marine, R.; Montmayeur, A.; P.W.; Paden; Queen, K.; Sheth, M.; Tao, Y.; Tong, S.; Uehara, A.; Wang, H.                                                                                                                                                                                                                                                                                                                                                                                                                                                                                                                                                                           |
| EPI_ISL_977077, EPI_ISL_3525915                                                                                                                                                                                                                                                                                                                                                                                                                                                                                                                                                                                                                                                                                                                                  | Rhode Island Department of Health                                                                                       | Infectious Disease Program, Broad Institute of Harvard and MIT                                                                                                                                                                                                           | Adams, G.; Azevedo, K.; B.L.; B.W.; Bauer, M.; Birren; Carter, A.; Chaluvasi, S.; D.J.; DeRuff, K.; Gallagher, G.; Gladden-Young, A.; Huard, R.; J.E.; K.J.; King, E.; Lagerborg, K.; Lemieux; Loreth, C.; Macinnis; Miller, A.; Normandin, E.; P.C.; Park; Pearlman, L.; Reilly, S.; Rudy, M.; Sabeti; Siddle; Smole, S.; Tomkins-Tinch, C.; and Macinnis; and Sabeti                                                                                                                                                                                                                                                                                                                                        |
| EPI_ISL_2603333, EPI_ISL_3024110                                                                                                                                                                                                                                                                                                                                                                                                                                                                                                                                                                                                                                                                                                                                 | Rhode Island State Health Laboratory                                                                                    | Rhode Island State Health Laboratory                                                                                                                                                                                                                                     | Ewa King; Kristin Carpenter-Azevedo; Richard C. Huard                                                                                                                                                                                                                                                                                                                                                                                                                                                                                                                                                                                                                                                         |
| EPI_ISL_2798289, EPI_ISL_2798298, EPI_ISL_2798406                                                                                                                                                                                                                                                                                                                                                                                                                                                                                                                                                                                                                                                                                                                | Riga East University Hospital, National Microbiology Reference Laboratory                                               | Riga East University Hospital, National Microbiology Reference Laboratory; Eurofins Genomics Europe Sequencing GmbH                                                                                                                                                      | Arzu Algulieva; Diāna Dušacka; Dārta Pūpola; Ilva Pole; Jevgenijs Bodrenko; Jūlija Čevere; Reinis Vangrav; Reinis Zeltmatis; Sergejs Nīkišins; Girts Šķenders                                                                                                                                                                                                                                                                                                                                                                                                                                                                                                                                                 |
| EPI_ISL_419831                                                                                                                                                                                                                                                                                                                                                                                                                                                                                                                                                                                                                                                                                                                                                   | Royal Darwin Hospital                                                                                                   | Victorian Infectious Diseases Reference Laboratory and Microbiological Diagnostic Unit Public Health Laboratory, Doherty Institute                                                                                                                                       | Caly L.; Druce J.; Meumann, E.; Sait, M.; Schultz M.; Seemann T.                                                                                                                                                                                                                                                                                                                                                                                                                                                                                                                                                                                                                                              |
| EPI_ISL_521860, EPI_ISL_521862, EPI_ISL_779406, EPI_ISL_779408, EPI_ISL_854745, EPI_ISL_2321157, EPI_ISL_2379269, EPI_ISL_2839562, EPI_ISL_2839563, EPI_ISL_2839567, EPI_ISL_2839568, EPI_ISL_2907544, EPI_ISL_2907545, EPI_ISL_2907546, EPI_ISL_3030412                                                                                                                                                                                                                                                                                                                                                                                                                                                                                                         | see above                                                                                                               | MDU-PHL                                                                                                                                                                                                                                                                  | Caly L.; Druce J.; M.L.; Meumann, E.; N.L.; Sait; Sait, M.; Schultz M.; Seemann T.; Sherry; Sherry, N.                                                                                                                                                                                                                                                                                                                                                                                                                                                                                                                                                                                                        |
| EPI_ISL_2250195                                                                                                                                                                                                                                                                                                                                                                                                                                                                                                                                                                                                                                                                                                                                                  | Royal Darwin Hospital Pathology                                                                                         | Microbiological Diagnostic Unit Public Health Laboratory (MDU-PHL)                                                                                                                                                                                                       | Caly L.; Druce J.; M.L.; Meumann, E.; N.L.; Sait; Seemann T.; Sherry                                                                                                                                                                                                                                                                                                                                                                                                                                                                                                                                                                                                                                          |
| EPI_ISL_426902                                                                                                                                                                                                                                                                                                                                                                                                                                                                                                                                                                                                                                                                                                                                                   | Royal Darwin Hospital Pathology                                                                                         | Microbiological Diagnostic Unit Public Health Laboratory and Victorian Infectious Diseases Reference Laboratory, Doherty Institute                                                                                                                                       | Caly L.; Druce J.; Meumann, E.; Sait, M.; Schultz M.; Seemann T.; Sherry, N.                                                                                                                                                                                                                                                                                                                                                                                                                                                                                                                                                                                                                                  |
| EPI_ISL_430631                                                                                                                                                                                                                                                                                                                                                                                                                                                                                                                                                                                                                                                                                                                                                   | Royal Darwin Hospital Pathology                                                                                         | Microbiological Diagnostic Unit Public Health Laboratory and Victorian Infectious Diseases Reference Laboratory, The Peter Doherty Institute for Infection and Immunity                                                                                                  | Caly L.; Druce J.; Meumann, E.; Sait, M.; Schultz M.; Seemann T.; Sherry, N.                                                                                                                                                                                                                                                                                                                                                                                                                                                                                                                                                                                                                                  |
| EPI_ISL_456497                                                                                                                                                                                                                                                                                                                                                                                                                                                                                                                                                                                                                                                                                                                                                   | Royal Darwin Hospital Pathology                                                                                         | Microbiological Diagnostic Unit Public Health Laboratory, The Peter Doherty Institute for Infection and Immunity                                                                                                                                                         | Caly L.; Druce J.; Meumann, E.; Sait, M.; Schultz M.; Seemann T.; Sherry, N.                                                                                                                                                                                                                                                                                                                                                                                                                                                                                                                                                                                                                                  |
| EPI_ISL_577607, EPI_ISL_3247060                                                                                                                                                                                                                                                                                                                                                                                                                                                                                                                                                                                                                                                                                                                                  | Royal Hobart Hospital                                                                                                   | Royal Hobart Hospital                                                                                                                                                                                                                                                    | Cooley L.; Dr L. Cooley; Mr R Vanhaeften; van Haeften R.                                                                                                                                                                                                                                                                                                                                                                                                                                                                                                                                                                                                                                                      |
| EPI_ISL_522621, EPI_ISL_522636, EPI_ISL_522689, EPI_ISL_522705                                                                                                                                                                                                                                                                                                                                                                                                                                                                                                                                                                                                                                                                                                   | Royal Hobart Hospital Microbiology Department                                                                           | MDU-PHL                                                                                                                                                                                                                                                                  | Cooley L.; M.B.; Sait M.; Schultz; Seemann T.; Sherry N.; van Haeften R.                                                                                                                                                                                                                                                                                                                                                                                                                                                                                                                                                                                                                                      |
| EPI_ISL_451145, EPI_ISL_467989, EPI_ISL_468039, EPI_ISL_483126, EPI_ISL_508606, EPI_ISL_516550, EPI_ISL_622762, EPI_ISL_654808, EPI_ISL_752598, EPI_ISL_771368, EPI_ISL_1029956, EPI_ISL_1704790, EPI_ISL_2462350, EPI_ISL_2462351, EPI_ISL_2462352, EPI_ISL_2462353, EPI_ISL_2462355, EPI_ISL_2462356, EPI_ISL_2462358, EPI_ISL_2462361, EPI_ISL_2462364, EPI_ISL_2462365, EPI_ISL_2839981, EPI_ISL_2839983, EPI_ISL_2839984, EPI_ISL_2839987, EPI_ISL_2839989, EPI_ISL_2839993, EPI_ISL_2839994, EPI_ISL_2839996, EPI_ISL_2978690, EPI_ISL_2978692, EPI_ISL_3071861, EPI_ISL_3071863, EPI_ISL_3391989, EPI_ISL_3391992, EPI_ISL_3710500, EPI_ISL_3710501, EPI_ISL_3710502, EPI_ISL_3710503, EPI_ISL_3710505, EPI_ISL_3710510, EPI_ISL_3710512, EPI_ISL_3710513 | SA Pathology<br>SA Pathology<br>SA Pathology<br>VPRL                                                                    | Caitlin Selway; Chuan Kok Lim; Geoff Higgins; Ivan Bastian; Julien Soubrier; Karin Kassahn; Lex Leong; Luke Walters; Mark Turra; Song Gao<br>Beard, MR.; C.K.; Coldbeck-Shackley, R.; Kirby, E.; L.E.X.; Leong; Lim; Llamas, B.; Merrett, J.; Shue, B.; Van Der Hoek, K. |                                                                                                                                                                                                                                                                                                                                                                                                                                                                                                                                                                                                                                                                                                               |
| see above                                                                                                                                                                                                                                                                                                                                                                                                                                                                                                                                                                                                                                                                                                                                                        | SA Pathology                                                                                                            | SA Pathology                                                                                                                                                                                                                                                             | Caitlin Selway; Chuan Kok Lim; Geoff Higgins; Ivan Bastian; Julien Soubrier; Karin Kassahn; Lex Leong; Luke Walters; Mark Turra; Song Gao                                                                                                                                                                                                                                                                                                                                                                                                                                                                                                                                                                     |
| EPI_ISL_455603                                                                                                                                                                                                                                                                                                                                                                                                                                                                                                                                                                                                                                                                                                                                                   | SA Pathology                                                                                                            | VPRL                                                                                                                                                                                                                                                                     | Beard, MR.; C.K.; Coldbeck-Shackley, R.; Kirby, E.; L.E.X.; Leong; Lim; Llamas, B.; Merrett, J.; Shue, B.; Van Der Hoek, K.                                                                                                                                                                                                                                                                                                                                                                                                                                                                                                                                                                                   |
| EPI_ISL_2209888                                                                                                                                                                                                                                                                                                                                                                                                                                                                                                                                                                                                                                                                                                                                                  | SANTA CASA DE MISERICORDIA SAO JOSE                                                                                     | Instituto Butantan / Mendelics                                                                                                                                                                                                                                           | Antonio Jorge Martins; Claudia Renata dos Santos Barros; David Schlesinger; Debora Botequilo Moretti; Dimas Tadeu Covas; Elaine Cristina Marqueze; Elaine Vieira Santos; Evandra Strazza Rodrigues; Heidge Fukumasu; Jayme Augusto de Souza-Neto; José Salvatore Leister Patané; Luiz Alcantara; Luiz Lehmann Coutinho; Maria Carolina Elias; Maurício Lacerda Nogueira; Rafael dos Santos Bezerra; Raul Machado Neto; Rejane Maria Tommasini Grotto; Ricardo Haddad; Sandra Coccuzzo Sampaio Vessoni; Simone Kashima; Svetoslav Nanev Slavov; Vincent Louis Viala                                                                                                                                            |

|                                                                                                                                                                                                            |                                                                                                                                 |                                                                                                                                                                                                                    |                                                                                                                                                                                                                                                                                                                                                                                                                                                                                                                                                                                                                                                                                                                |                                                                                                                                                                                                                                                                                                                                                                                                                                                                                                                                                                                                                                                                                                                                                                                            |
|------------------------------------------------------------------------------------------------------------------------------------------------------------------------------------------------------------|---------------------------------------------------------------------------------------------------------------------------------|--------------------------------------------------------------------------------------------------------------------------------------------------------------------------------------------------------------------|----------------------------------------------------------------------------------------------------------------------------------------------------------------------------------------------------------------------------------------------------------------------------------------------------------------------------------------------------------------------------------------------------------------------------------------------------------------------------------------------------------------------------------------------------------------------------------------------------------------------------------------------------------------------------------------------------------------|--------------------------------------------------------------------------------------------------------------------------------------------------------------------------------------------------------------------------------------------------------------------------------------------------------------------------------------------------------------------------------------------------------------------------------------------------------------------------------------------------------------------------------------------------------------------------------------------------------------------------------------------------------------------------------------------------------------------------------------------------------------------------------------------|
| EPI_ISL_2791863, EPI_ISL_2792359, EPI_ISL_2986100, EPI_ISL_3646356                                                                                                                                         | SARS-CoV-2 Sequencing Consortium                                                                                                | Castilla y Leon-Spain Consortium                                                                                                                                                                                   | SARS-CoV-2 Sequencing Consortium                                                                                                                                                                                                                                                                                                                                                                                                                                                                                                                                                                                                                                                                               | Antonio Orduña-Domingo; Carlos Fuster Foz; Carmen Aldea-Mansilla; Carmen Gimeno Crespo; David Abad; Gabriel March Rosello; Gabriel March Rossello; Gregoria Megías Lobón; Jose María Eiros Bouza; Laura Sánchez de Prada; M. Isabel Fernandez-Natal; Marta Dominguez-Gil; Marta Hernandez; Maria Antonia García Castro; Mª Fe Brezmes-Valdivieso; Noelia Arenal Andrés; Silvia Rojo; Sonsoles Garcinuño Pérez                                                                                                                                                                                                                                                                                                                                                                              |
| EPI_ISL_2930583, EPI_ISL_3195597, EPI_ISL_3199067, EPI_ISL_3543127                                                                                                                                         | SARS-CoV-2 testing team, National Institute of Infectious Diseases                                                              | Pathogen Genomics Center, National Institute of Infectious Diseases                                                                                                                                                |                                                                                                                                                                                                                                                                                                                                                                                                                                                                                                                                                                                                                                                                                                                | Hazuka Y Furihata; Hiromizu Takahashi; Kentaro Itokawa; Makoto Kuroda; Masanori Hashino; Masumichi Saito; Naomi Nojiri; Nozomu Hanaoka; Rina Tanaka; Tsuguto Fujimoto; Tsuyoshi Sekizuka                                                                                                                                                                                                                                                                                                                                                                                                                                                                                                                                                                                                   |
| EPI_ISL_2828403                                                                                                                                                                                            | SC (UCO) Igiene e Sanità Pubblica, ASUGI, Trieste                                                                               | ARGO Laboratorio Genomica ed Epigenomica                                                                                                                                                                           |                                                                                                                                                                                                                                                                                                                                                                                                                                                                                                                                                                                                                                                                                                                | Barbone F; Breda C; Busetti M; D'Agaro P; Dal Monego S; Degasperì M; Fontana F; Licastro D; Marcello A; Piscianz E; Segat L                                                                                                                                                                                                                                                                                                                                                                                                                                                                                                                                                                                                                                                                |
| EPI_ISL_3355211, EPI_ISL_3813516                                                                                                                                                                           | SD Public Health Laboratory                                                                                                     | Centers for Disease Control and Prevention Division of Viral Diseases, Pathogen Discovery                                                                                                                          | Alex Burgin; Ben Rambo-Martin; Clinton Paden; Dakota Howard; Dave Wentworth; Dhwani Batra; Jasmine Padilla; Justin Lee; Krista Queen; Kristen Knipe; Kristine Lacey; Mark Burroughs; Matthew Schmerer; Meghan Bentz; Mili Sheth; Peter Cook; Sam Shepard; Sarah Nobles; Suxiang Tong; Vivien Dugan; Yvette Unoarumhi                                                                                                                                                                                                                                                                                                                                                                                           |                                                                                                                                                                                                                                                                                                                                                                                                                                                                                                                                                                                                                                                                                                                                                                                            |
| EPI_ISL_2156799                                                                                                                                                                                            | SD Public Health Laboratory                                                                                                     | Pathogen Discovery, Respiratory Viruses Branch, Division of Viral Diseases, Centers for Disease Control and Prevention                                                                                             | Adam Retchless; Anna Kelleher; Anna Uehara; Brian Lynch; Clinton R. Paden; Dhwani Batra; Halbin Wang; Han Jia Justin Ng; Jasmine Padilla; Jing Zhang; Justin Lee; Krista Queen; Mark Burroughs; Mili Sheth; Morgan Davis; Peter Cook; Rachel Marine; Sarah Nobles; Suxiang Tong; Tara Coalter; Yan Li; Ying Tao                                                                                                                                                                                                                                                                                                                                                                                                |                                                                                                                                                                                                                                                                                                                                                                                                                                                                                                                                                                                                                                                                                                                                                                                            |
| EPI_ISL_2966511                                                                                                                                                                                            | SE Kyiv CDC MHU                                                                                                                 | The Institute of Molecular Biology and Genetics of NASU                                                                                                                                                            |                                                                                                                                                                                                                                                                                                                                                                                                                                                                                                                                                                                                                                                                                                                | M.Tukalo et al.                                                                                                                                                                                                                                                                                                                                                                                                                                                                                                                                                                                                                                                                                                                                                                            |
| EPI_ISL_2934570, EPI_ISL_2934573, EPI_ISL_2966512                                                                                                                                                          | SECP MHU                                                                                                                        | The Institute of Molecular Biology and Genetics of NASU                                                                                                                                                            |                                                                                                                                                                                                                                                                                                                                                                                                                                                                                                                                                                                                                                                                                                                | M.Tukalo et al.                                                                                                                                                                                                                                                                                                                                                                                                                                                                                                                                                                                                                                                                                                                                                                            |
| EPI_ISL_3636644, EPI_ISL_2983897                                                                                                                                                                           | SEEBMO<br>SELAS MEDILYS                                                                                                         | Instituto Nacional de Saude (INSA)<br>Department of Virology, Henri Mondor University Hospital, Assistance Publique Hôpitaux de Paris, Université Paris-Est Créteil, INSERM U955                                   |                                                                                                                                                                                                                                                                                                                                                                                                                                                                                                                                                                                                                                                                                                                | Borges et al<br>Alexandre Soulier; Christophe Rodriguez; Elisabeth Trawinski; Guillaume Gricourt; Jean-Michel Pawlotsky; Melissa N'Debi; Slim Fourati; Vanessa Demontant                                                                                                                                                                                                                                                                                                                                                                                                                                                                                                                                                                                                                   |
| EPI_ISL_3385835                                                                                                                                                                                            | SERVICIOS MEDICOS OLIMPUS                                                                                                       | Instituto Nacional de Salud- Dirección de Investigación en Salud Pública                                                                                                                                           | Carlos Franco-Muñoz; Carmen Osorio; Diana Malo; Diego A. Álvarez-Díaz; Diego Andrés Prada; Gerardo Santamaría; Hector Alejandro Ruiz-Moreno; Jhonnatán Reales-González; Jorge Rivera; Juan Camilo Martínez; Julian Naizaque; Katherine Laiton-Donato; Lisseth Pardo; Magdalena Wiesner; Marcela Mercado-Reyes; Maria T. Herrera-Sepúlveda; Marta Lopez Blanco; Martha Lucia Ospina Martínez; Paola Rojas; Sergio Gomez; Sheryll Corchuelo; Ángela Alarcon Cruz                                                                                                                                                                                                                                                 |                                                                                                                                                                                                                                                                                                                                                                                                                                                                                                                                                                                                                                                                                                                                                                                            |
| EPI_ISL_3262126                                                                                                                                                                                            | SI «Public Health Center of MHU»                                                                                                | The Institute of Molecular Biology and Genetics of NASU                                                                                                                                                            |                                                                                                                                                                                                                                                                                                                                                                                                                                                                                                                                                                                                                                                                                                                | M.Tukalo et al.                                                                                                                                                                                                                                                                                                                                                                                                                                                                                                                                                                                                                                                                                                                                                                            |
| EPI_ISL_2600819                                                                                                                                                                                            | SIESP CHIETI - DRIVE IN VASTO                                                                                                   | Istituto Zooprofilattico Sperimentale dell'Abruzzo e Molise "G. Caporale"                                                                                                                                          |                                                                                                                                                                                                                                                                                                                                                                                                                                                                                                                                                                                                                                                                                                                | Ancora M; Calistri P; Cammà C; Caporale M; Curini V; Delli Compagni E; Di Domenico M; Di Lollo Valeria; Di Pasquale A; Lorusso A; Mangone I; Marcacci M; Puglia I; Rinaldi A; Savini G; Scialabba S                                                                                                                                                                                                                                                                                                                                                                                                                                                                                                                                                                                        |
| EPI_ISL_2131385                                                                                                                                                                                            | SIESP DIPARTIMENTO DI PREVENZIONE TERAMO                                                                                        | Istituto Zooprofilattico Sperimentale dell'Abruzzo e Molise "G. Caporale"                                                                                                                                          |                                                                                                                                                                                                                                                                                                                                                                                                                                                                                                                                                                                                                                                                                                                | Ancora M; Calistri P; Cammà C; Caporale M; Curini V; Delli Compagni E; Di Domenico M; Di Lollo Valeria; Di Pasquale A; Lorusso A; Mangone I; Marcacci M; Puglia I; Rinaldi A; Savini G; Scialabba S                                                                                                                                                                                                                                                                                                                                                                                                                                                                                                                                                                                        |
| EPI_ISL_2565131, EPI_ISL_2586843, EPI_ISL_2587835, EPI_ISL_2883604, EPI_ISL_3255597, EPI_ISL_3534795                                                                                                       | SK-Roy Romanow Provincial Laboratory                                                                                            | National Microbiology Laboratory (NML)                                                                                                                                                                             | Alanna Senecal; Amanda Lang; Anna Majer; Anneliese Landgraff; CanCOGE's metadata curation team; Darian Hole; Elsie Grudeski; Gary Van Domselaar; Grace Seo; Jennifer Tanner; Jessica Minion; Kara Loos; Keith MacKenzie; Kirsten Biggar; Madison Chapel; Meredith Faires; Morag Graham; Natalie Knox; Nathalie Bastien; Philip Mabon; Public Health Agency of Canada CanCOGE team; Rachel; Rachel DePaulo; Rhiannon Huzarewich; Russell Mandes; Ryan McDonald; Shari Tyson; Timothy Booth; Yan Li                                                                                                                                                                                                              |                                                                                                                                                                                                                                                                                                                                                                                                                                                                                                                                                                                                                                                                                                                                                                                            |
| EPI_ISL_3251603                                                                                                                                                                                            | SP ZOZ Centralny Szpital Kliniczny UM w Lodzi Pracownia Diagnostyki Wirusow Oddechowych                                         | Wojewodzka Stacja Sanitarno-Epidemiologiczna w Rzeszowie, Laboratorium Diagnostyki Medycznej                                                                                                                       |                                                                                                                                                                                                                                                                                                                                                                                                                                                                                                                                                                                                                                                                                                                | Anna Nowakowska; Karolina Ostrowska; Katarzyna Wilk; Marzena Baranowska                                                                                                                                                                                                                                                                                                                                                                                                                                                                                                                                                                                                                                                                                                                    |
| EPI_ISL_2230114                                                                                                                                                                                            | SP ZOZ Centralny Szpital Kliniczny UM w Lodzi Zaklad Diadnostyki i Laboratorijnej Pracownia Wirusow Oddechowych                 | 1. National Institute of Public Health - National Institute of Hygiene; 2. Eurofins Genomics Europe Sequencing GmbH                                                                                                |                                                                                                                                                                                                                                                                                                                                                                                                                                                                                                                                                                                                                                                                                                                | ECDC COVID-19 WGS support team; Eurofins Genomics Europe Sequencing Team; Gierczyński Rafał; Sadkowska-Todys Małgorzata; Wolkowicz Tomasz; Zacharczuk Katarzyna                                                                                                                                                                                                                                                                                                                                                                                                                                                                                                                                                                                                                            |
| EPI_ISL_2139699, EPI_ISL_2139705                                                                                                                                                                           | SYNLAB                                                                                                                          | GIGA Medical Genomics                                                                                                                                                                                              |                                                                                                                                                                                                                                                                                                                                                                                                                                                                                                                                                                                                                                                                                                                | Bouchra Boujemla; Cécile Meex; Keith Durkin; Maria Artesi; Marie-Pierre Hayette; Nathalie Renotte; Pierrette Melin; Raphaël Boreux; Sébastien Bontems; Vincent Bours                                                                                                                                                                                                                                                                                                                                                                                                                                                                                                                                                                                                                       |
| EPI_ISL_2642840                                                                                                                                                                                            | SYNLAB Eesti OÜ                                                                                                                 | Department of Microbiology, Institute of Biomedicine and Translational Medicine, University of Tartu                                                                                                               | Aare Abroi; Andrio Lahesaare; Arina Shablinskaja; Dagmar Hoidmets; Ene-Ly Jõgeda; Eveli Kallas; Heiki Niglas; Irja Lutsar; Kai Truusalu; Kaisa Truus; Katrin Kaarna; Kristi Huik; Liidia Dotsenko; Lili Azin Milani; Mari-Anne Härma; Mats Hansen; Meri Pauskar; Olga Sadikova; Paul Naaber; Radko Avi; Taavi Päll; Tuuli Reisberg; Ulvi Gerst Talas                                                                                                                                                                                                                                                                                                                                                           |                                                                                                                                                                                                                                                                                                                                                                                                                                                                                                                                                                                                                                                                                                                                                                                            |
| EPI_ISL_1645330, EPI_ISL_2128387                                                                                                                                                                           | SYNLAB Jena Oncoscreen                                                                                                          | Robert Koch Institute                                                                                                                                                                                              |                                                                                                                                                                                                                                                                                                                                                                                                                                                                                                                                                                                                                                                                                                                |                                                                                                                                                                                                                                                                                                                                                                                                                                                                                                                                                                                                                                                                                                                                                                                            |
| EPI_ISL_3496538, EPI_ISL_2114081, EPI_ISL_2844954                                                                                                                                                          | SYNLAB Labor München Zentrum LMZ<br>SYNLAB MVZ Leverkusen                                                                       | Robert Koch Institute<br>Robert Koch Institute                                                                                                                                                                     |                                                                                                                                                                                                                                                                                                                                                                                                                                                                                                                                                                                                                                                                                                                |                                                                                                                                                                                                                                                                                                                                                                                                                                                                                                                                                                                                                                                                                                                                                                                            |
| EPI_ISL_2116799, EPI_ISL_1157473                                                                                                                                                                           | SYNLAB MVZ Trier<br>SYNLAB MVZ Weiden                                                                                           | Robert Koch Institute<br>Robert Koch Institute                                                                                                                                                                     |                                                                                                                                                                                                                                                                                                                                                                                                                                                                                                                                                                                                                                                                                                                |                                                                                                                                                                                                                                                                                                                                                                                                                                                                                                                                                                                                                                                                                                                                                                                            |
| EPI_ISL_2230856, EPI_ISL_2230904, EPI_ISL_2444430, EPI_ISL_2444524, EPI_ISL_2978498, EPI_ISL_3160813, EPI_ISL_3277674, EPI_ISL_3503605, EPI_ISL_3503622, EPI_ISL_3548281, EPI_ISL_3721688, EPI_ISL_3721752 | see above                                                                                                                       | Salud Digna                                                                                                                                                                                                        | Instituto Nacional de Medicina Genomica                                                                                                                                                                                                                                                                                                                                                                                                                                                                                                                                                                                                                                                                        | Abraham Campos-Romero; Cedro-Tanda A; Escobar-Arrazola; Escobar-Arrazola MA; Gonzalez-Barrera D; Herrera-Montalvo LA.; Hidalgo-Miranda A; Luna-Ruiz Marco; M; Mendoza-Vargas A; Moreno-Camacho José Luis; Munguia-Garza P; Ramirez-Vega O; Rangel-DeLeon D; Reyes-Grajeda JP; Rodriguez-Gallegos Jorge; Yair Alfaro-Mora                                                                                                                                                                                                                                                                                                                                                                                                                                                                   |
| EPI_ISL_3373994, EPI_ISL_3374008                                                                                                                                                                           | Salud Digna, A.C                                                                                                                | Andersen lab at Scripps Research                                                                                                                                                                                   |                                                                                                                                                                                                                                                                                                                                                                                                                                                                                                                                                                                                                                                                                                                | Abraham Garcia Gil; Jose Luis Moreno Camacho; Marco Antonio Luna Ruiz-Esparza; Miguel A. Fernandez Rojas; SEARCH Alliance with Abraham Campos Romero                                                                                                                                                                                                                                                                                                                                                                                                                                                                                                                                                                                                                                       |
| EPI_ISL_2199992                                                                                                                                                                                            | Samodzielny Publiczny Zespół Opieki Zdrutowej w Brzesku                                                                         | 1. Tricity SARS-CoV-2 sequencing consortium: University of Gdansk, Medical University of Gdansk, Vaxican Ltd., Invicta Ltd. 2. National Institute of Public Health - National Institute of Hygiene, Warsaw, Poland |                                                                                                                                                                                                                                                                                                                                                                                                                                                                                                                                                                                                                                                                                                                | Celina Cybulska; Karolina Gackowska; Katarzyna Groth; Katarzyna Zacharczuk; Krystyna Bienkowska Szewczyk; Lukasz Rabalski; Maciej Grzybek; Maciej Kosinski; Magdalena Nowakowska; Małgorzata Sadkowska-Todys; Tomasz Wolkowicz                                                                                                                                                                                                                                                                                                                                                                                                                                                                                                                                                             |
| EPI_ISL_755292, EPI_ISL_2156226                                                                                                                                                                            | San Diego County Public Health Laboratory<br>San Lazaro Hospital (SLH)                                                          | Andersen lab at Scripps Research<br>Philippine Genome Center                                                                                                                                                       |                                                                                                                                                                                                                                                                                                                                                                                                                                                                                                                                                                                                                                                                                                                | Brett Austin; Jovan Shephard; SEARCH Alliance San Diego with Tracy Basler<br>Alethea R. de Guzman; Anna Ong-Lim; Arianne A. Zamora; Asia Louisa U. Chong; Benedict A. Maralit; Candice Francheska B. Tambaoan; Carlo M. Lapid; Celia Carlos; Devon Ray Pacial; Edsel Maurice Salvaña; El King D. Morado; Eva Maria Cutlongco-de la Paz; Francis A. Tablizo; Irish Coleen A. Asin; Jaime C. Montoya; Jan Michael C. Yap; Jo-Hannah S. Llamas; John Q. Wong; Joshua Gregor A. Dizon; Juan Antonio R. Magalang; Karol Sophia Agape R. Padilla; Kenneth M. Kim; Kris P. Punayan; Marc Edsel C. Ayes; Marc Jerrone R. Castro; Maria Rosario Singh-Vergeire and Cynthia P. Saloma; Maria Sofia L. Yangzon; Marissa Alejandria; Razel Nikka M. Hao; Rianna Patricia S. Cruz; Sheila Mae M. Araiza |
| EPI_ISL_542367                                                                                                                                                                                             | San Matteo Hospital Pavia                                                                                                       | Dep. Of Oncology and Hemato-Oncology University of Milan                                                                                                                                                           | Antonio Piralla; Carlo Federico Perno; Chiara Vismara; Claudia Alteri; Elisa Matarazzo; Fausto Baldanti; Federica Giardina; Federica Novazzi; Luna Colagrossi; Maria Antonello; Massimo Puoti; Monica Tallarita; Oscar Massimiliano Epis; Roberto Fumagalli; Silvia Renica; Stefano Gaiarsa; Valentino Costabile; Valeria Cento                                                                                                                                                                                                                                                                                                                                                                                |                                                                                                                                                                                                                                                                                                                                                                                                                                                                                                                                                                                                                                                                                                                                                                                            |
| EPI_ISL_748667, EPI_ISL_750171, EPI_ISL_750177                                                                                                                                                             | Sanatorio Americano                                                                                                             | Institut Pasteur de Montevideo                                                                                                                                                                                     | Ana Carolina Mendonça; Andrés Lizasoain; Camila Simoes; Cecilia Alonso; Cecilia Salazar; Daiana Mir; Fernando López-Tort; Fernando Motta; Gonzalo Bello; Igor Arantes; Ignacio Ferrés; Jose Sotelo; Leticia Maya; Leticia Garay Martins; Luciana Appolinario; Lucia Spangenberg; Mailen Arleo; Mariana Brandes; Marilda Mendonça Siqueira; Marilda Tereza Mar da Rosa; Maria José Benitez-Galeano; Martín Graña; Matias Castells; Matias Victoria; Matias Salvo; Natalia Rego; Natalia Reyes; Pablo Smircich; Paola Cristina Resende; Rodney Colina; Tamara Fernandez-Calero; Tania Possi; Tatiana Schäffer Gregiaini; Verónica Noya; Yasser Vega                                                              |                                                                                                                                                                                                                                                                                                                                                                                                                                                                                                                                                                                                                                                                                                                                                                                            |
| EPI_ISL_1439597, EPI_ISL_1477049, EPI_ISL_479800                                                                                                                                                           | Sanitary-Epidemiological And Public Health Department Of Tashkent Region, Uzbekistan<br>Sapporo City Institute of Public Health | Center of Genomics and bioinformatics, Bioinformatics laboratory<br>Pathogen Genomics Center, National Institute of Infectious Diseases                                                                            |                                                                                                                                                                                                                                                                                                                                                                                                                                                                                                                                                                                                                                                                                                                | Abdurakhmon N Yusupov; Ibrokhim Y Abdurakhmonov.; Mirzakamol S Ayubov; Mukhammadjon H Mirzakhmedov; Shukhrat E Shermatov; Zabardast T Buriev<br>Asami Ohnishi; Hajime Kamiya; Kentaro Itokawa; Makoto Kuroda; Masanori Hashino; Motoi Suzuki; Rina Tanaka; Tsuyoshi Sekizuka                                                                                                                                                                                                                                                                                                                                                                                                                                                                                                               |
| EPI_ISL_3611031                                                                                                                                                                                            | Satkhira Medical College, Satkhira                                                                                              | Virology Laboratory, International Center for Diarrhoeal Disease Research, Bangladesh (ICDDR,B)                                                                                                                    | ASM Alamgir; Abhijit Guho; Ahmed Nawsher Alam; Dinesh Mondal; Firdausi Qadri; Hassan Afrad; Mahbubur Rahman; Manjur Hossain Khan; Md. Mahfuzur Rahman; Mohammad Enayet Hossain; Mohammad Jubair; Mohammad Shahidul Islam; Mohammed Ziaur Rahman; Mojuu Miah; Mustafizur Rahman; Razib Mazumder; Samir Kumar Saha; Senjuti Saha; Tahmina Shirin                                                                                                                                                                                                                                                                                                                                                                 |                                                                                                                                                                                                                                                                                                                                                                                                                                                                                                                                                                                                                                                                                                                                                                                            |
| EPI_ISL_1009160, EPI_ISL_904004, EPI_ISL_525721                                                                                                                                                            | School of Pharmacy<br>Scientific Veterinary Institute Novi Sad<br>Seattle Flu Study                                             | School of Pharmacy<br>Veterinary Specialized Institute "Kraljevo", Serbia<br>Seattle Flu Study                                                                                                                     | Ahmed Kandeil; Ghazi Kayali; Mina Nabil Kamel; Mohamed A Ali; Rabeh El-Shesheny; Walid Abi Habib<br>Afonso, C.; Banovic Djeri, B.; Jankovic, M.; Jovanovic, T.; Knezevic, A.; Petrovic, T.; Sekler, M.; Tesovic, B.; Vidanovic, D.; Volkening, J.<br>Amanda Adler; Barry R. Lutz; Benjamin Pelle; Caitlin R. Wolf; Chris D. Frazar; Deborah A. Nickerson; Elisabeth Brandstetter; Helen Y. Chu; Janet A. Englund; Jay Shendure; Jeff Duchin; Jover Lee; Kairsten Fay; Karen Cowgill; Kirsten Lacombe; Lea M. Starita; Mark J. Rieder; Matthew Richardson; Matthew Thompson; Melissa Truong; Michael Boeckh; Michael Famulare; Misja Ilcisin; Peter D. Han; Stephanie Schragi; Thomas R. Sibley; Trevor Bedford |                                                                                                                                                                                                                                                                                                                                                                                                                                                                                                                                                                                                                                                                                                                                                                                            |
| EPI_ISL_856767, EPI_ISL_2136102, EPI_ISL_2158700, EPI_ISL_2158704, EPI_ISL_2158706, EPI_ISL_2158767, EPI_ISL_2158826                                                                                       | see above                                                                                                                       | Servicio Virosis Respiratorias-Departamento Virologia-INEI                                                                                                                                                         | Instituto Nacional Enfermedades Infecciosas C.G.Malbran                                                                                                                                                                                                                                                                                                                                                                                                                                                                                                                                                                                                                                                        | Avaro M.; Baumeister E.; Benedetti E.; Campos J.; Cisterna D.; Dattero ME; Lorenzo F.; Molina V.; Perandones C.; Poklepovich T.; Pontoriero A.; Russo M.; Tuduri E.                                                                                                                                                                                                                                                                                                                                                                                                                                                                                                                                                                                                                        |
| EPI_ISL_911290                                                                                                                                                                                             | Servicio de Microbiologia, Hospital Universitario Son Espases                                                                   | SeqCOVID-SPAIN consortium/IBV(CSIC)                                                                                                                                                                                |                                                                                                                                                                                                                                                                                                                                                                                                                                                                                                                                                                                                                                                                                                                | Antonio Oliver and SeqCOVID-SPAIN consortium; Carla López-Causapé; Jordi Reina                                                                                                                                                                                                                                                                                                                                                                                                                                                                                                                                                                                                                                                                                                             |
| EPI_ISL_2545298, EPI_ISL_2567037,                                                                                                                                                                          | Shamir Medical Center (Asaf Harofe)                                                                                             | Shamir Medical Center (Asaf Harofe)                                                                                                                                                                                |                                                                                                                                                                                                                                                                                                                                                                                                                                                                                                                                                                                                                                                                                                                | Abu Hamad Ramzia; Adina Bar Chaim; Anna Vishnevsky; Chen Weiner; Netta Zuckerman; Nir Rainy; Patricia Benveniste-Lekovitz; Reut Sorek Abramovich; Yevgeni Yegorov                                                                                                                                                                                                                                                                                                                                                                                                                                                                                                                                                                                                                          |

|                                                                                                                                                                                                                                                                                |                                                                                                              |                                                                                                                                                                                 |                                                                                                                                                                                                                                                                                                                                                                                                                                                                                                                                                                                                                                                                                                                                            |
|--------------------------------------------------------------------------------------------------------------------------------------------------------------------------------------------------------------------------------------------------------------------------------|--------------------------------------------------------------------------------------------------------------|---------------------------------------------------------------------------------------------------------------------------------------------------------------------------------|--------------------------------------------------------------------------------------------------------------------------------------------------------------------------------------------------------------------------------------------------------------------------------------------------------------------------------------------------------------------------------------------------------------------------------------------------------------------------------------------------------------------------------------------------------------------------------------------------------------------------------------------------------------------------------------------------------------------------------------------|
| EPI_ISL_2834318,<br>EPI_ISL_2834420,<br>EPI_ISL_3667329,<br>EPI_ISL_3667406                                                                                                                                                                                                    |                                                                                                              |                                                                                                                                                                                 |                                                                                                                                                                                                                                                                                                                                                                                                                                                                                                                                                                                                                                                                                                                                            |
| EPI_ISL_1468958<br>EPI_ISL_582641,<br>EPI_ISL_582648                                                                                                                                                                                                                           | Sharp HealthCare Laboratory<br>Sheikh Khalifa Medical City                                                   | Andersen lab at Scripps Research<br>Molecular/Surveillance lab Sheikh Khalifa Medical City                                                                                      | Art Mendoza; Cathy Woerle; Jacquelyn Berumen; Liam McGinnis; Omid Bakhtar; SEARCH Alliance San Diego with Aaron Harding<br>Amirtharaj Francis; Hala Imambaccus; Hiba Saud; Sahar Almarzooq; Sajeed Abdul; Stefan Weber                                                                                                                                                                                                                                                                                                                                                                                                                                                                                                                     |
| EPI_ISL_2432957,<br>EPI_ISL_2931282                                                                                                                                                                                                                                            | Shenzhen Center for Disease Control and Prevention                                                           | National Institute for Viral Disease Control and Prevention, China CDC                                                                                                          | Can Zhu; Fang Yang; Kai Nie; Long Chen; Peihua Niu; Qinglu Lu; RenLi Zhang; Renli Zhang; Shaoyu Deng and Yaqing He; ShiSong Fang; Weihua Wu; Xiang Zhao; XiaoLiang Xiao; XinYi Wei; Xinyi Wei; YaQing He; Yanan Feng; Yue Li                                                                                                                                                                                                                                                                                                                                                                                                                                                                                                               |
| EPI_ISL_2106272<br>EPI_ISL_500540                                                                                                                                                                                                                                              | Siem Reap Provincial Laboratory<br>Singapore General Hospital                                                | Virology Unit, Institut Pasteur du Cambodge<br>Department of Microbiology                                                                                                       | Cecile Troupin; Chau Darapeak; Chin Savuth; Erik A Karlsson; Jurre Y Siegers; Kraing Sidonn; Lmleav Leak; Leakhena Pum; Ly Sovann; Vearna Duong; Yi Sengdoeurn<br>Chenhao Li; Karrie Ko; Kern Rei Chng; Kian Sing Chan; Kun Lee Lim; Lynette Oon; Niranjan Nagarajan; Nurdyana Abdul Rahman                                                                                                                                                                                                                                                                                                                                                                                                                                                |
| EPI_ISL_1285461,<br>EPI_ISL_3495619                                                                                                                                                                                                                                            | Sonic - Bioscientia - MVZ Labor Saar GmbH                                                                    | Robert Koch Institute                                                                                                                                                           |                                                                                                                                                                                                                                                                                                                                                                                                                                                                                                                                                                                                                                                                                                                                            |
| EPI_ISL_1155027                                                                                                                                                                                                                                                                | Sonic - MVZ Medizinisches Labor Bremen GmbH                                                                  | Robert Koch Institute                                                                                                                                                           |                                                                                                                                                                                                                                                                                                                                                                                                                                                                                                                                                                                                                                                                                                                                            |
| EPI_ISL_3216891                                                                                                                                                                                                                                                                | South Dakota Department Of Health Laboratory                                                                 | Minnesota Department of Health, Public Health Laboratory                                                                                                                        | Alexandra Lorentz; Jacob Garfin; Matt Plumb; and Xiong Wang                                                                                                                                                                                                                                                                                                                                                                                                                                                                                                                                                                                                                                                                                |
| EPI_ISL_1017035<br>EPI_ISL_667803,<br>EPI_ISL_1383237,<br>EPI_ISL_2405113,<br>EPI_ISL_2828071                                                                                                                                                                                  | South Dakota Public Health Laboratory<br>South Eastern Area Laboratory Services (SEALS)                      | University of Minnesota Genomics Center<br>NSW Health Pathology - Institute of Clinical Pathology and Medical Research; Westmead Hospital; University of Sydney                 | Benjamin Auch; Corbin Dirks; Daryl M. Gohl; Jaquelyn Kuriger-Laber; John Garbe; and Chris Carlson<br>CIDM-PH et al.                                                                                                                                                                                                                                                                                                                                                                                                                                                                                                                                                                                                                        |
| EPI_ISL_2928016, EPI_ISL_2928020, EPI_ISL_2928022, EPI_ISL_2928026, EPI_ISL_2928027, EPI_ISL_3546327, EPI_ISL_3546329, EPI_ISL_3546331, EPI_ISL_3546332, EPI_ISL_3546334, EPI_ISL_3546336, EPI_ISL_3546337, EPI_ISL_3546338, EPI_ISL_3546341, EPI_ISL_3546350, EPI_ISL_3546351 | see above<br>South Sudan Ministry of Health, WHO South Sudan, MRC/UVRI & LSHTM Uganda Research Unit          | MRC/UVRI & LSHTM Uganda Research Unit, South Sudan Ministry of Health, WHO South Sudan                                                                                          | Abe G. Abias; Dan Lule Bugembe; Dennis Kenyi Lodiongo; James Ayel; John Rumunu; Joseph Francis Wamala; Juma John HM; Lu Lojok Deng; Matthew Cotten; My V.T. Phan; Pontiano Kaleebu; Richard Lino Loro Lako; Sudhir Bunga                                                                                                                                                                                                                                                                                                                                                                                                                                                                                                                   |
| EPI_ISL_456162, EPI_ISL_456297, EPI_ISL_3164095, EPI_ISL_3164113, EPI_ISL_3164114, EPI_ISL_3164115, EPI_ISL_3164116, EPI_ISL_3164117, EPI_ISL_3164119, EPI_ISL_3164122                                                                                                         | see above<br>Southern Community Labs Dunedin                                                                 | Institute of Environmental Science and Research (ESR)                                                                                                                           | Anja Werno; Antje van der Linden; Arlo Upton; Chris Mansell; David Hammer; Dragana Drinkovic; Erasmus Smit; Gary McAuliffe; Hana Sofia Andersson; Hermes Perez; James Ussher; Jill Sherwood; Jing Wang; Joep de Lig; Josh Freeman; Julia Howard; Juliet Elvy; Lauren Jelly; Mary DeAlmeida; Matt Blakiston; Matt Storey; Matthew Rogers; Max Bloomfield; Michael Addidle; Michelle Balm; Muhammad Faisal; Nikki Freed; Olin Silander; Olivia Stroeven; Paula scholes; Rachel Boyle; Sally Roberts; SallyAnn Harbison; Sarah Jefferies; Sharmil Muttaiyah; Susan Lin; Susan Morpeth; Susan Taylor; Timothy Blackmore; Vani Sathyendran; Veronica Playle; Virginia Hope; Xiaoyun Ren                                                         |
| EPI_ISL_3465414                                                                                                                                                                                                                                                                | Southern. IML Pathology                                                                                      | NSW Health Pathology - Institute of Clinical Pathology and Medical Research; Westmead Hospital; University of Sydney                                                            | Arnott A.; Draper J.; Gall M.; Martinez E.; Rockett R.; Sintchenko V.; on behalf of ICPMR                                                                                                                                                                                                                                                                                                                                                                                                                                                                                                                                                                                                                                                  |
| EPI_ISL_513364,<br>EPI_ISL_2812885,<br>EPI_ISL_3185235                                                                                                                                                                                                                         | St Vincent's Pathology (SydPath)                                                                             | NSW Health Pathology - Institute of Clinical Pathology and Medical Research; Westmead Hospital; University of Sydney                                                            | CIDM-PH et al.                                                                                                                                                                                                                                                                                                                                                                                                                                                                                                                                                                                                                                                                                                                             |
| EPI_ISL_3769556,<br>EPI_ISL_3827508                                                                                                                                                                                                                                            | State Hygienic Laboratory at the University of Iowa                                                          | State Hygienic Laboratory at the University of Iowa                                                                                                                             | Alankar Kampowale; Anna Yakos; Cindy Toll; Davis Rieckenberg; Erik Twaits; Jeff Benfer; Kris Eveland; Kristen Zanon; Mariah Knutson; Mohammed Allam; Valerie Reeb; Wes Hottel                                                                                                                                                                                                                                                                                                                                                                                                                                                                                                                                                              |
| EPI_ISL_1495112                                                                                                                                                                                                                                                                | State Institution «Public Health Center of Ministry of Health of Ukraine»                                    | Robert Koch Institute, ZBS1 Highly Pathogenic Viruses, Berlin, Germany                                                                                                          | Andreas Nitsche; Annika Brinkmann; Iryna Demchyshyna; Janine Michel; Liudmyla Chernenko; Roman Rodyna; Steven Uddin                                                                                                                                                                                                                                                                                                                                                                                                                                                                                                                                                                                                                        |
| EPI_ISL_2724751,<br>EPI_ISL_3033311,<br>EPI_ISL_3307845                                                                                                                                                                                                                        | State Laboratories Division, Hawaii State Department of Health                                               | State Laboratories Division, Hawaii State Department of Health                                                                                                                  | Ayana Garnet; Daniel Strange; Drew Kuwazaki; Edward Desmond; Pamela O'Brien; Razvan Sultana                                                                                                                                                                                                                                                                                                                                                                                                                                                                                                                                                                                                                                                |
| EPI_ISL_2378161                                                                                                                                                                                                                                                                | State Testing Facility                                                                                       | Altius Institute for Biomedical Research                                                                                                                                        | Alex Isner; Alex Nguyen; Amanda Gale; Audra Johnson; Clem Green; Daniel Bates; Eric Thorland; Jacob Rodriguez; Jean Robinson; Jemma Nelson; Jessica Kunder; John Stamatiyannopoulos; Joshua Richards; Julia Wald; Kneshay Harper; Lauren Mitchell; Mark Frerker; Matt Hartman; Michael Buckley; Muhammad Halimun; Rebecca Bruders; Sadie Patraw; Sofia Olsson; Tobias Ragoczy                                                                                                                                                                                                                                                                                                                                                              |
| EPI_ISL_2685167                                                                                                                                                                                                                                                                | Statens Serum Institut Bioinformatics and Microbial Genomics                                                 | Statens Serum Institut Bioinformatics and Microbial Genomics                                                                                                                    | Danish Covid-19 Genome Consortium                                                                                                                                                                                                                                                                                                                                                                                                                                                                                                                                                                                                                                                                                                          |
| EPI_ISL_491087<br>EPI_ISL_3333656                                                                                                                                                                                                                                              | Suceava County Emergency Hospital<br>Sultanah Bahiyah Hospital, Alor Setar                                   | "Stefan cel Mare" University Metagenomics Lab<br>Institute for Medical Research, Infectious Disease Research Centre, National Institutes of Health, Ministry of Health Malaysia | Antoniadis Panagiotis et al.; Lobiuc Andrei<br>Anasir MI; Azizan MA; Kamel K; Mohd Zawawi Z; Ramly N; Robert F; Suppiah J; Thayan R                                                                                                                                                                                                                                                                                                                                                                                                                                                                                                                                                                                                        |
| EPI_ISL_1618581, EPI_ISL_1618717, EPI_ISL_1659723, EPI_ISL_2206051, EPI_ISL_2208089, EPI_ISL_2278840, EPI_ISL_2416113, EPI_ISL_2416224, EPI_ISL_2793372, EPI_ISL_2980825, EPI_ISL_3157117, EPI_ISL_3157751, EPI_ISL_3783217, EPI_ISL_3784811                                   | see above<br>Swedish national genomic surveillance program of SARS-CoV-2                                     | The Public Health Agency of Sweden                                                                                                                                              | Alma Brolund; Maria Lind Karlberg; Maximilian Riess; Swedish national genomic surveillance program of SARS-CoV-2                                                                                                                                                                                                                                                                                                                                                                                                                                                                                                                                                                                                                           |
| EPI_ISL_2544248<br>EPI_ISL_2812822,<br>EPI_ISL_3465688                                                                                                                                                                                                                         | Swiss Analysis AG<br>Sydney South West Pathology Service (SSWPS) - Liverpool Hospital - NSW Health Pathology | Institute of Medical Virology<br>NSW Health Pathology - Institute of Clinical Pathology and Medical Research; Westmead Hospital; University of Sydney                           | Alexandra Trkola; Annette Audigé; Cyril Shah; Gabriela Ziltener; Guido Bloembergen; Jon Huder; Jürg Böni; Kevin Steiner; Maria Grünberg; Maryam Zaheri; Michael Huber; Riccarda Capaul; Stefan Schmutz; Verena Kufner<br>Arnott A.; CIDM-PH et al.; Draper J.; Gall M.; Martinez E.; Rockett R.; Sintchenko V.; on behalf of ICPMR                                                                                                                                                                                                                                                                                                                                                                                                         |
| EPI_ISL_545039,<br>EPI_ISL_2462426,<br>EPI_ISL_2828059,<br>EPI_ISL_2828067                                                                                                                                                                                                     | Sydney South West Pathology Service (SSWPS) - Royal Prince Alfred Hospital - NSW Health Pathology            | NSW Health Pathology - Institute of Clinical Pathology and Medical Research; Westmead Hospital; University of Sydney                                                            | CIDM-PH et al.                                                                                                                                                                                                                                                                                                                                                                                                                                                                                                                                                                                                                                                                                                                             |
| EPI_ISL_2546970, EPI_ISL_2547009, EPI_ISL_2547049, EPI_ISL_2788840, EPI_ISL_3025707, EPI_ISL_3087661, EPI_ISL_3505850, EPI_ISL_3507062, EPI_ISL_3507076, EPI_ISL_3507229, EPI_ISL_3665778, EPI_ISL_3665822                                                                     | see above<br>Synlab Eesti OÜ                                                                                 | 1. Laboratory of Communicable Diseases (Estonia); 2. Eurofins Genomics Europe Sequencing GmbH                                                                                   | Liidia Dotsenko et al.                                                                                                                                                                                                                                                                                                                                                                                                                                                                                                                                                                                                                                                                                                                     |
| EPI_ISL_3236951                                                                                                                                                                                                                                                                | TAMBO MEMORIAL LABORATORY                                                                                    | National Institute for Communicable Diseases of the National Health Laboratory Service                                                                                          | Amoako DG; Bhiman JN; Everatt J; Ismail A; Mahlangu B; Mnguni A; Mohale T; Ntuli N; Scheepers C                                                                                                                                                                                                                                                                                                                                                                                                                                                                                                                                                                                                                                            |
| EPI_ISL_914813                                                                                                                                                                                                                                                                 | TAMIZAJE COMUNITARIO - PASO CANOAS                                                                           | Incienza, Instituto Costarricense de Investigación y Enseñanza en Nutrición y Salud                                                                                             | Adriana Godínez; Claudio Soto-Garita; Estela Cordero; Francisco Duarte; Hebleen Porras; Melany Calderón & Mariel López                                                                                                                                                                                                                                                                                                                                                                                                                                                                                                                                                                                                                     |
| EPI_ISL_3088724,<br>EPI_ISL_3325748                                                                                                                                                                                                                                            | TGen North                                                                                                   | TGen North                                                                                                                                                                      | "Jolene Bowers; Brett Van Tassel; Chris French; Darrin Lemmer; Dave Engelthaler; Dave Engelthaler"; Hayley Yaglom; Heather Centner; Jolene Bowers                                                                                                                                                                                                                                                                                                                                                                                                                                                                                                                                                                                          |
| EPI_ISL_2156332                                                                                                                                                                                                                                                                | THE LORD'S GRACE MEDICAL AND INDUSTRIAL CLINIC                                                               | Philippine Genome Center                                                                                                                                                        | Alethea R. de Guzman; Anna Ong-Lim; Arianne A. Zamora; Asia Louisa U. Chong; Benedict A. Maralit; Candice Francheska B. Tambaoan; Carlo M. Lapid; Celia Carlos; Devon Ray Pacial; Edsel Maurice Salvaña; El King D. Morado; Elcid Aaron R. Pangillinan; Eva Maria Cutiongco-de la Paz; Francis A. Tablizo; Irish Coleen A. Asin; Jaime C. Montoya; Jan Michael C. Yap; Jo-Hannah S. Llaimes; John Q. Wong; Joshua Gregor A. Dizon; Juan Antonio R. Magalang; Karol Sophia Agape R. Padilla; Kenneth M. Kim; Kris P. Punayan; Marc Edsel C. Ayes; Marc Jerrone R. Castro; Maria Rosario Singh-Vergeire and Cynthia P. Saloma; Maria Sofia L. Yangzon; Marissa Alejandria; Razel Nikka M. Hao; Rianna Patricia S. Cruz; Sheila Mae M. Araiza |
| EPI_ISL_436099,<br>EPI_ISL_2693000                                                                                                                                                                                                                                             | TSGH-CP molecular lab                                                                                        | TSGH-CP molecular lab                                                                                                                                                           | Cheng-Lih Perng; Chien-Wen Chen; Chih-Kai Chang; Feng-Yee Chang; Hsing-Yi Chung; Hung-Sheng Shang; Jung-Chung Lin; Kuo-Ming Yeh; Kuo-Sheng Hung; Ming-Jr JIAN; Sheng-Kang Chiu; Shih-Hung Tsai; Tien-Yao Chang                                                                                                                                                                                                                                                                                                                                                                                                                                                                                                                             |
| EPI_ISL_2364005,<br>EPI_ISL_3230306                                                                                                                                                                                                                                            | TYKS, Kliininen mikrobiologia                                                                                | Expert Microbiology, National Institute for Health and Welfare                                                                                                                  | Carita Savolainen-Kopra; Erika Lindh; Haider al-Hello; Jani Hakilahti; Kirsi Liitsola; Niina Ikonen; Olli Vapalahti; Pekka Ellonen; Phuoc Truong; Päivi Laurila; Ravi Kant; Sari Hannula; Soile Blomqvist; Teemu Smura                                                                                                                                                                                                                                                                                                                                                                                                                                                                                                                     |
| EPI_ISL_2931333,<br>EPI_ISL_3019481,<br>EPI_ISL_3019485,<br>EPI_ISL_3547090,<br>EPI_ISL_3547094                                                                                                                                                                                | Temporary Specimen Collection Centre at the AsiaWorld-Expo                                                   | Hong Kong Department of Health                                                                                                                                                  | Alan K.L. Tsang; Edman T.K. Lam; Ken H.L. Ng; Peter C.W. Yip; Rickjason C.W. Chan                                                                                                                                                                                                                                                                                                                                                                                                                                                                                                                                                                                                                                                          |
| EPI_ISL_756311, EPI_ISL_1490226, EPI_ISL_2230692, EPI_ISL_2230696, EPI_ISL_2230698, EPI_ISL_2478954, EPI_ISL_2478969, EPI_ISL_2478992, EPI_ISL_2478994, EPI_ISL_2545198                                                                                                        | see above<br>The Caribbean Public Health Agency                                                              | Carrington Lab, Department of PreClinical Sciences, Faculty of Medical Sciences, The University of the West Indies                                                              | Adesh Ramsubhag; Anushka Ramjag; Arianne Brown-Jordan; Avery Hinds; Ayoola Oyinloye; Chinna Chinnadurai; Christine V. F. Carrington; Christopher Oura; Gabriel Escobar; Jaya Jayaraman; Jerome Foster; Karla Georges; Marsha Ivey; Naresh Nandram; Narine Singh; Nikita S. D. Sahadeo; Nuno Faria; Oliver Pybus; Rahul Naidu; Rajini Haraksingh; Risha Singh; Roshan Parasram; Sarah Hill; Sharon Belmar-George; Shawn Charles; Simone Keizer-Beache; Stanley Giddings; SueMin Nathaniel; Vernie Ramkissoon                                                                                                                                                                                                                                |
| EPI_ISL_2631433,<br>EPI_ISL_2631435,<br>EPI_ISL_2631440                                                                                                                                                                                                                        | The Caribbean Public Health Agency                                                                           | Carrington Lab, Department of PreClinical Sciences, Faculty of Medical Sciences, The University of the West Indies, St Augustine Campus                                         | Anushka Ramjag; Arianne Brown-Jordan; Avery Hinds; Christine V. F. Carrington; Christopher Oura; David Johnson; Gabriel Escobar; Karla Georges; Naresh Nandram; Nikita S. D. Sahadeo; Nuno Faria; Oliver Pybus; Risha Singh; Roshan Parasram; Sarah Hill; SueMin Nathaniel; Vernie Ramkissoon                                                                                                                                                                                                                                                                                                                                                                                                                                              |
| EPI_ISL_2621682,<br>EPI_ISL_2621699                                                                                                                                                                                                                                            | The Caribbean Public Health Agency                                                                           | Carrington Lab, Department of Preclinical Sciences, Faculty of Medical Sciences, The University of the                                                                          | Anushka Ramjag; Arianne Brown-Jordan; Avery Hinds; Christine V. F. Carrington; Christopher Oura; Gabriel Escobar; Karla Georges; Kenneth George; Nikita S. D. Sahadeo; Nuno Faria; Oliver Pybus; Risha Singh; Roshan Parasram; Sarah Hill; SueMin Nathaniel; Vernie Ramkissoon                                                                                                                                                                                                                                                                                                                                                                                                                                                             |

|                                                                                                                                                                                                                                                                                                                                                                                                                        |                                                                                               |                                                                                                                                                                                                                     |                                                                                                                                                                                                                                                                                                                                                                                                                                                                                                                                                                                                                                                                                                                                                                                                                                  |
|------------------------------------------------------------------------------------------------------------------------------------------------------------------------------------------------------------------------------------------------------------------------------------------------------------------------------------------------------------------------------------------------------------------------|-----------------------------------------------------------------------------------------------|---------------------------------------------------------------------------------------------------------------------------------------------------------------------------------------------------------------------|----------------------------------------------------------------------------------------------------------------------------------------------------------------------------------------------------------------------------------------------------------------------------------------------------------------------------------------------------------------------------------------------------------------------------------------------------------------------------------------------------------------------------------------------------------------------------------------------------------------------------------------------------------------------------------------------------------------------------------------------------------------------------------------------------------------------------------|
| EPI_ISL_2617930, EPI_ISL_2678143, EPI_ISL_2678171, EPI_ISL_2678174, EPI_ISL_2678180, EPI_ISL_2716571, EPI_ISL_2716576, EPI_ISL_2716577, EPI_ISL_2716580, EPI_ISL_2716592, EPI_ISL_2716595, EPI_ISL_2716602, EPI_ISL_2756569, EPI_ISL_2756582, EPI_ISL_2967979, EPI_ISL_2967981, EPI_ISL_2967991, EPI_ISL_2967993, EPI_ISL_3610771, EPI_ISL_3642741, EPI_ISL_3655553, EPI_ISL_3655572, EPI_ISL_3655576, EPI_ISL_3688254 | West Indies                                                                                   |                                                                                                                                                                                                                     |                                                                                                                                                                                                                                                                                                                                                                                                                                                                                                                                                                                                                                                                                                                                                                                                                                  |
|                                                                                                                                                                                                                                                                                                                                                                                                                        | see above                                                                                     | The Caribbean Public Health Agency                                                                                                                                                                                  | Carrington Lab, Department of Preclinical Sciences, Faculty of Medical Sciences, The University of the West Indies, St Augustine Campus                                                                                                                                                                                                                                                                                                                                                                                                                                                                                                                                                                                                                                                                                          |
| EPI_ISL_2154525                                                                                                                                                                                                                                                                                                                                                                                                        | The Lord's Grace Medical and Industrial Clinic                                                | Philippine Genome Center                                                                                                                                                                                            | Alethea R. de Guzman; Anna Ong-Lim; Arianne A. Zamora; Asia Louisa U. Chong; Benedict A. Maralit; Candice Francheska B. Tambaoan; Carlo M. Lapid; Celia Carlos; Devon Ray Pacial; Edsel Maurice Salvaña; El King D. Morado; Eva Maria Cutiongco-de la Paz; Francis A. Tablizo; Irish Coleen A. Asin; Jaime C. Montoya; Jan Michael C. Yap; Jo-Hannah S. Llamas; John Q. Wong; Joshua Gregor A. Dizon; Juan Antonio R. Magalang; Karol Sophia Agape R. Padilla; Kenneth M. Kim; Kris P. Punayan; Marc Edsel C. Ayes; Marc Jerrone R. Castro; Maria Rosario Singh-Vergeire and Cynthia P. Saloma; Maria Sofia L. Yangzon; Marissa Alejandria; Razel Nikka M. Hao; Rianna Patricia S. Cruz; Sheila Mae M. Araiza                                                                                                                    |
| EPI_ISL_541334, EPI_ISL_960436                                                                                                                                                                                                                                                                                                                                                                                         | The National Institute of Public Health                                                       | State Veterinary Institute Prague                                                                                                                                                                                   | A; Cernikova; D; H; J; Jirincova; L; M; Nagy; Novakova; Stara; Trnka; Vecerova                                                                                                                                                                                                                                                                                                                                                                                                                                                                                                                                                                                                                                                                                                                                                   |
| EPI_ISL_826855, EPI_ISL_828505                                                                                                                                                                                                                                                                                                                                                                                         | The National University Hospital of Iceland                                                   | deCODE genetics                                                                                                                                                                                                     | Agnar Helgason; Alma Moller; Arna B Agustsdottir; Arnaldur Gylfason; Asgeir Sigurdsson; Aslaug Jonasdottir; Berglind Eiriksdottir; Bjarni Thorbjornsson; Brynjar O Jonsen; Daniel F Gudbjartsson; Droplaug N Magnusdottir; Elisabet E Gardarsdottir; Emil A Thorarensen; Gardar Sveinbjornsson; Gisli Masson; Gudmundur Georgsson; Gudmundur L Norddahl; Gudrun Sigmundsdottir; Hakon Jonsson; Hannes Eggertsson; Hilma Holm; Ingileif Jonsdottir; Jona Saemundsdottir; Kamilla S Josefsdottir; Karl Stefansson; Karl G Kristinnsson; Kjartan R Gudmundsson; Kristin E Sveinsdottir; Louise le Roux; Maney Sveinsdottir; Olafia S Gretarsdottir; Olafur T Magnusson; Pall Melsted; Patrick Sulem; Run Fridrikdottir; Solvi Rognvaldsson; Thora R Gunnarsdottir; Thordur Kristjansson; Thorolfur Gudnason; Unnur Thorsteinsdottir |
| EPI_ISL_3620743                                                                                                                                                                                                                                                                                                                                                                                                        | The Ohio State University Applied Microbiology Services Laboratory                            | The Ohio State University Applied Microbiology Services Laboratory                                                                                                                                                  | Seth A. Faith PhD                                                                                                                                                                                                                                                                                                                                                                                                                                                                                                                                                                                                                                                                                                                                                                                                                |
| EPI_ISL_754231                                                                                                                                                                                                                                                                                                                                                                                                         | The Republican Research and Practical Center for Epidemiology and Microbiology (RRPCEM)       | WHO National Influenza Centre Russian Federation                                                                                                                                                                    | Anatoly Krasko; Andrey Komissarov; Anna Ivanova; Artem Fadeev; Daria Danilenko; Dmitry Bazhenov; Dmitry Lioznov; Elena Gasich; Elena Nabieva; Georgii Bazykin; Kirill Bulda; Ksenia Safina; Kseniya Komissarova                                                                                                                                                                                                                                                                                                                                                                                                                                                                                                                                                                                                                  |
| EPI_ISL_2631429                                                                                                                                                                                                                                                                                                                                                                                                        | The Trinidad and Tobago Public Health Laboratory                                              | Carrington Lab, Department of PreClinical Sciences, Faculty of Medical Sciences, The University of the West Indies, St Augustine Campus                                                                             | Anushka Ramjag; Arianne Brown-Jordan; Avery Hinds; Christine V. F. Carrington; Christopher Oura; Gabriel Escobar; Karla Georges; Naresh Nandram; Nikita S. D. Sahadeo; Nuno Faria; Oliver Pybus; Risha Singh; Roshan Parasram; Sarah Hill; SueMin Nathaniel; Vernie Ramkissoon                                                                                                                                                                                                                                                                                                                                                                                                                                                                                                                                                   |
| EPI_ISL_2383206                                                                                                                                                                                                                                                                                                                                                                                                        | The teaching Baghdad hospital                                                                 | PCR lab                                                                                                                                                                                                             | Abdulhussein Thair; Fadhil Hula                                                                                                                                                                                                                                                                                                                                                                                                                                                                                                                                                                                                                                                                                                                                                                                                  |
| EPI_ISL_3150205                                                                                                                                                                                                                                                                                                                                                                                                        | Tivoli Fondazione Policlinico Universitario Agostino Gemelli IRCCS                            | Fondazione Policlinico Universitario Agostino Gemelli                                                                                                                                                               | Istituto di Microbiologia e Virologia                                                                                                                                                                                                                                                                                                                                                                                                                                                                                                                                                                                                                                                                                                                                                                                            |
| EPI_ISL_690802                                                                                                                                                                                                                                                                                                                                                                                                         | Tokyo Metropolitan Institute of Public Health                                                 | Pathogen Genomics Center, National Institute of Infectious Diseases                                                                                                                                                 | Kentaro Itokawa; Makoto Kuroda; Masanori Hashino; Rina Tanaka; Tsuyoshi Sekizuka                                                                                                                                                                                                                                                                                                                                                                                                                                                                                                                                                                                                                                                                                                                                                 |
| EPI_ISL_586278, EPI_ISL_933649                                                                                                                                                                                                                                                                                                                                                                                         | Toronto Invasive Bacterial Diseases Network                                                   | McMaster University                                                                                                                                                                                                 | Ahmed Draia; Allison McGeer; Andrew G. McArthur; Angel Li; Emily Panousis; Hooman Derakhshani; Jalees Nasir; Kuganya Nirmalarajah; Michael Surette; Patryk Aftanas; Samira Mubareka                                                                                                                                                                                                                                                                                                                                                                                                                                                                                                                                                                                                                                              |
| EPI_ISL_3274703                                                                                                                                                                                                                                                                                                                                                                                                        | TriCore Reference Laboratories                                                                | Center for Global Health, University of New Mexico Health Sciences Center                                                                                                                                           | Cecilia Thompson; Darrell Dinwiddie; Daryl Dorman; Karissa Culbreath; Kendra Pesko; Kurt Schwalm; Valerie Morley                                                                                                                                                                                                                                                                                                                                                                                                                                                                                                                                                                                                                                                                                                                 |
| EPI_ISL_717692, EPI_ISL_717698, EPI_ISL_2230681                                                                                                                                                                                                                                                                                                                                                                        | Trinidad Public Health Laboratory                                                             | Carrington Lab, Department of PreClinical Sciences, Faculty of Medical Sciences, The University of the West Indies                                                                                                  | Adesh Ramsuhbag; Arianne Brown-Jordan; Avery Hinds; Chinna Chinnadurai; Christine V. F. Carrington; Christopher Oura; Gabriel Escobar; Jaya Jayaraman; Jerome Foster; Karla Georges; Marsha Ivey; Naresh Nandram; Nikita S. D. Sahadeo; Nuno Faria; Oliver Pybus; Rahul Naidu; Rajini Haraksingh; Risha Singh; Roshan Parasram; Sarah Hill; Stanley Giddings; SueMin Nathaniel; Vernie Ramkissoon                                                                                                                                                                                                                                                                                                                                                                                                                                |
| EPI_ISL_3610769, EPI_ISL_3610772, EPI_ISL_3634447, EPI_ISL_3634448, EPI_ISL_3642745, EPI_ISL_3655577, EPI_ISL_3845997, EPI_ISL_3845999, EPI_ISL_3846004, EPI_ISL_3846011, EPI_ISL_3846017                                                                                                                                                                                                                              | see above                                                                                     | Trinidad Public Health Laboratory                                                                                                                                                                                   | Anushka Ramjag; Arianne Brown-Jordan; Avery Hinds; Christine V. F. Carrington; Christopher Oura; Gabriel Escobar; Nikita S. D. Sahadeo; Nuno Faria; Oliver Pybus; Risha Singh; Roshan Parasram; Sarah Hill; SueMin Nathaniel; Vernie Ramkissoon                                                                                                                                                                                                                                                                                                                                                                                                                                                                                                                                                                                  |
| EPI_ISL_539819                                                                                                                                                                                                                                                                                                                                                                                                         | Tuen Mun Hospital                                                                             | Hong Kong Department of Health                                                                                                                                                                                      | Alan K.L. Tsang; Dominic N.C. Tsang; Edman T.K. Lam; Peter C.W. Yip; Rickjason C.W. Chan                                                                                                                                                                                                                                                                                                                                                                                                                                                                                                                                                                                                                                                                                                                                         |
| EPI_ISL_3082641                                                                                                                                                                                                                                                                                                                                                                                                        | Tuzla University Clinical Center, Department of Microbiology                                  | University of Sarajevo, Veterinary Faculty, Laboratory for Molecular Diagnostic and Research Laboratory                                                                                                             | Goletic S; Goletic T; Hodzic A.; Jazic A.; Nicevic M.; Sabic E.; Softic A; Terzic I.; Tihic N                                                                                                                                                                                                                                                                                                                                                                                                                                                                                                                                                                                                                                                                                                                                    |
| EPI_ISL_3184720                                                                                                                                                                                                                                                                                                                                                                                                        | U.O. Microbiologia Laboratorio Unico Centro Servizi - AUSL della Romagna                      | U.O. Microbiologia, Laboratorio Unico Centro Servizi - AUSL della Romagna                                                                                                                                           | Giorgio Dirani                                                                                                                                                                                                                                                                                                                                                                                                                                                                                                                                                                                                                                                                                                                                                                                                                   |
| EPI_ISL_2625912                                                                                                                                                                                                                                                                                                                                                                                                        | UAB "Rezus.It"                                                                                | Institute of Biotechnology, Life Sciences Center, Vilnius University                                                                                                                                                | Emilija Vasiluinaite__ Milda Norkiene__ Danguale Ziogiene__ Albertas Timinskas__ Alma Gedvilaite                                                                                                                                                                                                                                                                                                                                                                                                                                                                                                                                                                                                                                                                                                                                 |
| EPI_ISL_2694306                                                                                                                                                                                                                                                                                                                                                                                                        | UAB "Rezus.It"                                                                                | National Public Health Surveillance Laboratory                                                                                                                                                                      | Ana Steponkiene; Danas Baksa; Jelena Razmuk; Lukas Vasionis; Lukas Zemaitis; Migle Gabrielaite; Svajune Muralyte                                                                                                                                                                                                                                                                                                                                                                                                                                                                                                                                                                                                                                                                                                                 |
| EPI_ISL_3060118                                                                                                                                                                                                                                                                                                                                                                                                        | UAB "Rezus.It"                                                                                | Vilnius University Hospital Santaros Klinikos, Center of Laboratory Medicine                                                                                                                                        | Daniel Naumovas; Dovile Juozapaitė; Gytis Dudas; Ingrida Olendraite; Ligita Raugaite; Monika Katenaite; Rimvydas Norvilas                                                                                                                                                                                                                                                                                                                                                                                                                                                                                                                                                                                                                                                                                                        |
| EPI_ISL_3711466                                                                                                                                                                                                                                                                                                                                                                                                        | UAB Diagnostikos laboratorija                                                                 | National Public Health Surveillance Laboratory                                                                                                                                                                      | Ana Steponkiene; Danas Baksa; Jelena Razmuk; Lukas Vasionis; Lukas Zemaitis; Migle Gabrielaite; Svajune Muralyte                                                                                                                                                                                                                                                                                                                                                                                                                                                                                                                                                                                                                                                                                                                 |
| EPI_ISL_3481592                                                                                                                                                                                                                                                                                                                                                                                                        | UAB InMedica                                                                                  | unknown                                                                                                                                                                                                             | Astra Vitkauskiene; Darius Cereskevicius; Inga Nasvytiene; Mantas Sarauskas; Marius Sukys; Rasa Ugenskiene; Renaldas Jurkevicius; Rima Vainoriene; Zivile Zemeckiene                                                                                                                                                                                                                                                                                                                                                                                                                                                                                                                                                                                                                                                             |
| EPI_ISL_2227176                                                                                                                                                                                                                                                                                                                                                                                                        | UAB Medicina practica laboratorija                                                            | Lithuanian University of Health Sciences                                                                                                                                                                            | Arnoldas Pautienius; Dovydas Gegys; Gediminas Alzbutas; Kamile Tamauskaite; Lukas Zemaitis; Vaiva Lesauskaite                                                                                                                                                                                                                                                                                                                                                                                                                                                                                                                                                                                                                                                                                                                    |
| EPI_ISL_2082432                                                                                                                                                                                                                                                                                                                                                                                                        | UAB Medicina practica laboratorija                                                            | National Public Health Surveillance Laboratory                                                                                                                                                                      | Ana Steponkiene; Danas Baksa; Jelena Razmuk; Lukas Vasionis; Lukas Zemaitis; Migle Gabrielaite; Svajune Muralyte                                                                                                                                                                                                                                                                                                                                                                                                                                                                                                                                                                                                                                                                                                                 |
| EPI_ISL_2345671                                                                                                                                                                                                                                                                                                                                                                                                        | UBS II DE ALVARES MACHADO                                                                     | Instituto Butantan / Mendelics                                                                                                                                                                                      | Antonio Jorge Martins; Claudia Renata dos Santos Barros; David Schlesinger; Debora Botequilo Moretti; Dimas Tadeu Covas; Elaine Cristina Marqueze; Elaine Vieira Santos; Evandra Strazza Rodrigues; Heidge Fukumasu; Jayme Augusto de Souza-Neto; José Salvatore Leister Patané; Luiz Alcantara; Luiz Lehmann Coutinho; Maria Carolina Elias; Maurício Lacerda Nogueira; Rafael dos Santos Bezerra; Raul Machado Neto; Rejane Maria Tommasini Grotto; Ricardo Haddad; Sandra Coccuzzo Sampaio Vessoni; Simone Kashima; Svetoslav Nanev Slavov; Vincent Louis Viala                                                                                                                                                                                                                                                               |
| EPI_ISL_2445202                                                                                                                                                                                                                                                                                                                                                                                                        | UBS II DE TANABI MILTON MARTINS PERCHES                                                       | Instituto Butantan                                                                                                                                                                                                  | Antonio Jorge Martins; Claudia Renata dos Santos Barros; David Schlesinger; Debora Botequilo Moretti; Dimas Tadeu Covas; Elaine Cristina Marqueze; Elaine Vieira Santos; Evandra Strazza Rodrigues; Heidge Fukumasu; Jayme Augusto de Souza-Neto; José Salvatore Leister Patané; Luiz Alcantara; Luiz Lehmann Coutinho; Maria Carolina Elias; Maurício Lacerda Nogueira; Rafael dos Santos Bezerra; Raul Machado Neto; Rejane Maria Tommasini Grotto; Ricardo Haddad; Sandra Coccuzzo Sampaio Vessoni; Simone Kashima; Svetoslav Nanev Slavov; Vincent Louis Viala                                                                                                                                                                                                                                                               |
| EPI_ISL_3370431, EPI_ISL_3535719                                                                                                                                                                                                                                                                                                                                                                                       | UC-Christus Clinical Hospital Laboratory                                                      | Laboratory of Molecular Virology, School of Medicine, Pontificia Universidad Catolica de Chile                                                                                                                      | Ana Maira Guzman; Andres E. Munoz-Marcos; Catalina Pardo-Roa; Eileen Serrano; Erick Salinas; Estefany Poblete; Francisco Melo; Jorge Levican; Leonardo I. Almonacid; Maria Jose Avendano; Maria Patricia Vega; Rafael A. Medina; Ricardo Enrique de la Barra; Tamara Garcia-Salum                                                                                                                                                                                                                                                                                                                                                                                                                                                                                                                                                |
| EPI_ISL_3104798                                                                                                                                                                                                                                                                                                                                                                                                        | UCC (Universidad Central del Caribe)                                                          | Grubaguh Lab - Yale School of Public Health                                                                                                                                                                         | Alejandro Valledo Degaudenzi; Anderson Brito; Annie Watkins; Chaney Kalinich; Chantal Vogels; Elisa Contreras; Esperanza Mendoza; Isabel Ott; Jessica Rothman; Joseph Fauver; Kendall Billig; Mallery Breban; Mary Petrone; Nathan Grubaugh; Robert Paulino-Ramirez; Tara Alpert; Tobias Koch; Victor Virgilio Calderon                                                                                                                                                                                                                                                                                                                                                                                                                                                                                                          |
| EPI_ISL_628761, EPI_ISL_648124, EPI_ISL_648125                                                                                                                                                                                                                                                                                                                                                                         | UHAS COVID-19 Lab                                                                             | UHAS COVID-19 Lab                                                                                                                                                                                                   | John O. Gyapong and the UHAS COVID-19 Lab Team; Jones Gyamfi; Kwabena O. Duedu; Reuben Ayivor-Djanie                                                                                                                                                                                                                                                                                                                                                                                                                                                                                                                                                                                                                                                                                                                             |
| EPI_ISL_3071388                                                                                                                                                                                                                                                                                                                                                                                                        | ULS Castelo Branco                                                                            | Instituto Nacional de Saude (INSA)                                                                                                                                                                                  | Borges et al                                                                                                                                                                                                                                                                                                                                                                                                                                                                                                                                                                                                                                                                                                                                                                                                                     |
| EPI_ISL_2249196, EPI_ISL_2249198                                                                                                                                                                                                                                                                                                                                                                                       | ULS Castelo Branco                                                                            | Instituto Nacional de Saude (INSA) e Centro de Investigacao em Biodiversidade e Recursos Geneticos (CIBIO), Universidade do Porto                                                                                   | Borges et al                                                                                                                                                                                                                                                                                                                                                                                                                                                                                                                                                                                                                                                                                                                                                                                                                     |
| EPI_ISL_2455132                                                                                                                                                                                                                                                                                                                                                                                                        | UM im. Karola Marcinkowskiego w Poznaniu Laboratorium UCA_Covid-19 Centrum Biologii Medycznej | 1. Tricity SARS-CoV-2 sequencing consortium: University of Gdansk, Medical University of Gdansk, Vaxican Ltd.; Invicta Ltd.; 2. National Institute of Public Health - National Institute of Hygiene, Warsaw, Poland | Celina Cybulska; Karolina Gackowska; Katarzyna Groth; Katarzyna Zacharczuk; Krystyna Bienkowska Szewczyk; Lukasz Rabalski; Maciej Grzybek; Maciej Kosinski; Magdalena Nowakowska; Marcin Lubocki; Malgorzata Sadkowska-Todys; Tomasz Wolkowicz                                                                                                                                                                                                                                                                                                                                                                                                                                                                                                                                                                                   |
| EPI_ISL_2284514                                                                                                                                                                                                                                                                                                                                                                                                        | UMC Groningen, Clinical Virology, Department of Medical Microbiology and Infection Prevention | UMC Groningen, Clinical Virology, Department of Medical Microbiology and Infection Prevention                                                                                                                       | Alexander Friedrich; Coretta Van Leer-Buter; Erley Lizarazo-Forero; Hubert Niesters; Lilli Gard; Marjolain Knoester; Monika Fliss; Sigrid Rosema; Xuewei Zhou                                                                                                                                                                                                                                                                                                                                                                                                                                                                                                                                                                                                                                                                    |
| EPI_ISL_733234, EPI_ISL_770647                                                                                                                                                                                                                                                                                                                                                                                         | UMMC-Health                                                                                   | WHO National Influenza Centre Russian Federation                                                                                                                                                                    | Andrey Komissarov; Anna Ivanova; Artem Fadeev; Daria Danilenko; Dmitry Bazhenov; Dmitry Lioznov; Elena Nabieva; Georgii Bazykin; Ksenia Safina; Kseniya Komissarova; Tatiana Platonova                                                                                                                                                                                                                                                                                                                                                                                                                                                                                                                                                                                                                                           |
| EPI_ISL_1937993, EPI_ISL_1938084                                                                                                                                                                                                                                                                                                                                                                                       | UNC Charlotte COVID-19 Testing Lab                                                            | UNC Charlotte Environmental Monitoring Laboratory                                                                                                                                                                   | Angelica Martins; Cynthia Gibas; Jannatul Ferdous; Jessica Schlueter; Kevin Lambirth; Visva Barua                                                                                                                                                                                                                                                                                                                                                                                                                                                                                                                                                                                                                                                                                                                                |
| EPI_ISL_3066764                                                                                                                                                                                                                                                                                                                                                                                                        | UNIDAD DE DIAGNOSTICO HEMATO ONCOLOGICA                                                       | Instituto Nacional de Salud                                                                                                                                                                                         | Carlos Franco-Muñoz; Carmen Osorio; Diana Malo; Diego A. Álvarez-Díaz; Diego Andrés Prada; Gerardo Santamaría; Hector Alejandro Ruiz-Moreno; Jhonnatán Reales-González; Jorge Rivera; Juan Camilo Martínez; Julian Naizaque; Katherine Laiton-Donato; Lisseth Pardo; Magdalena Wiesner; Marcela Mercado-Reyes; Maria T. Herrera-Sepúlveda; Marta Lopez Blanco; Martha Lucia Ospina Martínez; Paola Rojas; Sergio Gomez; Sheryll Corchuelo; Ángela Alarcon Cruz                                                                                                                                                                                                                                                                                                                                                                   |
| EPI_ISL_2646114, EPI_ISL_2895591                                                                                                                                                                                                                                                                                                                                                                                       | UNILABS                                                                                       | Instituto Nacional de Saude (INSA)                                                                                                                                                                                  | Borges et al                                                                                                                                                                                                                                                                                                                                                                                                                                                                                                                                                                                                                                                                                                                                                                                                                     |
| EPI_ISL_2796490                                                                                                                                                                                                                                                                                                                                                                                                        | UNILABS                                                                                       | Instituto Nacional de Saude (INSA) e BioSystems & Integrative Sciences Institute (BioISI) Genomics Unit, FCUL                                                                                                       | Borges et al                                                                                                                                                                                                                                                                                                                                                                                                                                                                                                                                                                                                                                                                                                                                                                                                                     |
| EPI_ISL_1820926                                                                                                                                                                                                                                                                                                                                                                                                        | UNIVERSIDAD DE Magdalena                                                                      | Instituto Nacional de Salud- Dirección de Investigación en Salud Pública                                                                                                                                            | Carlos Franco-Muñoz; Carmen Osorio; Christian Romero; Diana Malo; Diego A. Álvarez-Díaz; Diego Andrés Prada; Gerardo Santamaría; Hector Alejandro Ruiz-Moreno; Jhonnatán Reales-González; Jorge Rivera; Juan Camilo Martínez; Julian Naizaque; Katherine Laiton-Donato; Lisseth Pardo; Magdalena Wiesner; Marcela Mercado-Reyes; Maria T. Herrera-Sepúlveda; Marta Lopez Blanco; Martha Lucia Ospina Martínez; Paola Rojas; Patricia del Portillo; Sergio Gomez; Sheryll Corchuelo; Ángela Alarcon Cruz                                                                                                                                                                                                                                                                                                                          |
| EPI_ISL_982575, EPI_ISL_1038796, EPI_ISL_2383376, EPI_ISL_2661466, EPI_ISL_3048168, EPI_ISL_3048171, EPI_ISL_3375857                                                                                                                                                                                                                                                                                                   |                                                                                               |                                                                                                                                                                                                                     |                                                                                                                                                                                                                                                                                                                                                                                                                                                                                                                                                                                                                                                                                                                                                                                                                                  |

|                                                                                                                                                                      |                                                                                                                                                    |                                                                                                                      |                                                                                                                                                                                                                                                                                                                                                                                                                                                                                                                                                                                                                                                                                                                                                                                                                                                                                                                                                                                                                                                                                                                                                                                                                                                                                                                                                                                                                                                                                                                                                                                                                                                                                                                                            |
|----------------------------------------------------------------------------------------------------------------------------------------------------------------------|----------------------------------------------------------------------------------------------------------------------------------------------------|----------------------------------------------------------------------------------------------------------------------|--------------------------------------------------------------------------------------------------------------------------------------------------------------------------------------------------------------------------------------------------------------------------------------------------------------------------------------------------------------------------------------------------------------------------------------------------------------------------------------------------------------------------------------------------------------------------------------------------------------------------------------------------------------------------------------------------------------------------------------------------------------------------------------------------------------------------------------------------------------------------------------------------------------------------------------------------------------------------------------------------------------------------------------------------------------------------------------------------------------------------------------------------------------------------------------------------------------------------------------------------------------------------------------------------------------------------------------------------------------------------------------------------------------------------------------------------------------------------------------------------------------------------------------------------------------------------------------------------------------------------------------------------------------------------------------------------------------------------------------------|
| see above                                                                                                                                                            | US Air Force School of Aerospace Medicine                                                                                                          | US Air Force School of Aerospace Medicine                                                                            | Amanda Javorina; Anthony Fries; Carol Garrett; Clarise Starr; Cole Anderson; Elizabeth Macias; Fritz Castillo; Jennifer Black; Jennifer Meyer; Sarah Purves; William Buggele; William Gruner                                                                                                                                                                                                                                                                                                                                                                                                                                                                                                                                                                                                                                                                                                                                                                                                                                                                                                                                                                                                                                                                                                                                                                                                                                                                                                                                                                                                                                                                                                                                               |
| EPI_ISL_1324136                                                                                                                                                      | EPI_ISL_2340786, EPI_ISL_2432917, EPI_ISL_2604039, EPI_ISL_2773920, EPI_ISL_2803153, EPI_ISL_3412153                                               |                                                                                                                      |                                                                                                                                                                                                                                                                                                                                                                                                                                                                                                                                                                                                                                                                                                                                                                                                                                                                                                                                                                                                                                                                                                                                                                                                                                                                                                                                                                                                                                                                                                                                                                                                                                                                                                                                            |
| see above                                                                                                                                                            | UW Virology Lab                                                                                                                                    | UW Virology Lab                                                                                                      | Alexander Greninger; Hong Xie; Keith R Jerome; Lasata Shrestha; Margaret Mills; Maria Lukes; Meei-Li Huang; Michelle Lin; Nathan Breit; Noah Baker; No H. Baker; Patrick Mathias; Pavitra Roychoudhury; Ricardo Perez; Robert J. Livingston; Saraswathi Sathees; Sean Ellis; Shah Mohamed Bakhsh; Tien V. Nguyen                                                                                                                                                                                                                                                                                                                                                                                                                                                                                                                                                                                                                                                                                                                                                                                                                                                                                                                                                                                                                                                                                                                                                                                                                                                                                                                                                                                                                           |
| EPI_ISL_734958                                                                                                                                                       | UZ Leuven, National Reference Laboratory for Coronaviruses, Laboratory Medicine, Leuven, Belgium                                                   | KU Leuven, Rega Institute, Clinical and Epidemiological Virology                                                     | Bert Vanmechelen; Joan Marti-Carerras; Piet Maes; Tony Wawina-Bokalanga                                                                                                                                                                                                                                                                                                                                                                                                                                                                                                                                                                                                                                                                                                                                                                                                                                                                                                                                                                                                                                                                                                                                                                                                                                                                                                                                                                                                                                                                                                                                                                                                                                                                    |
| EPI_ISL_737952, EPI_ISL_737965                                                                                                                                       | Uganda Central Public Health Lab and Uganda Virus Research Institute                                                                               | MRC/UVRI & LSHTM Uganda Research Unit                                                                                | Dan Lule Bugembe; Matthew Cotten; My V.T. Phan; Pontiano Kaleebu et al.                                                                                                                                                                                                                                                                                                                                                                                                                                                                                                                                                                                                                                                                                                                                                                                                                                                                                                                                                                                                                                                                                                                                                                                                                                                                                                                                                                                                                                                                                                                                                                                                                                                                    |
| EPI_ISL_2671760, EPI_ISL_2942750, EPI_ISL_2970038, EPI_ISL_3805647, EPI_ISL_3805653                                                                                  | Unidad de Investigación Biomedica de Zacatecas (UIBZ)                                                                                              | Unidad de Genómica Avanzada                                                                                          | ; Alejandra García-Gasca; Alejandra Hernandez-Teran; Alejandro Sanchez-Flores; Alfredo Herrera-Estrella; Alicia Ocaña-Mondragón; Andreu Comas-García; Angel Gustavo Salas-Lais; Antonio Loza Roman; Bernardo Martínez-Miguel; Blanca Taboada; Brenda Irasema Maldonado-Meza; Bruno Gomez-Gil; Carla Ivon Herrera-Najera; Carlos F. Arias; Celia Boukadida; Célida Duque Molina; Célida Martínez- Rodríguez; Clara Esperanza Santacruz-Tinoco; Concepción Grajales-Muñiz; Consorcio Mexicano de Vigilancia Genómica (CoVIGen-Mex). Authors (In alphabetical order): Julio Elias Alvarado-Yaah; Cristóbal Cháidez-Quiróz; Daniel Fregoso-Rueda; Daniel Lira Morales; Eduardo Becerril-Vargas; Fernando Fontove-Herrera; Fidencio Mejía-Nepomuceno; Francisco Pulido; Gloria Elena Espinosa-Ayala; Gloria María Molina-Salinas; Gloria Vazquez; Hector Esteban Paz-Juarez; Hector Montoya-Fuentes; Helen Haydee Fernanda Ramirez-Plascencia; Irvin González-Lopez; Jean Pierre Gonzalez; Jesus Hernandez; Joel Armando Vázquez-Pérez.; Jorge Salas-Hernandez; Jose Antonio Enciso-Moreno; Jose Arturo Martínez-Orozco; Jose Esteban Muñoz-Medina; Jose de Jesus Nuñez-Contreras; Juan Bautista Chale-Dzul; Julissa Enciso-Ibarra; Luis Alberto Ochoa-Carrera; Margarita Matias-Florentino; Maria Guadalupe Santiago-Mauricio; Maria Guadalupe de Jesus Mireles-Rivera; Mario Mujica-Sanchez; Marissa Perez-Garcia; Nelly Selem-Mojica; Pavel Isa; Ricardo Ciria Merce; Ricardo Grande; Rosa María Gutiérrez Ries; Santiago Avila-Rios; Selene Zárate; Susana Lopez; Veronica Mata-Haro; Victor Eduardo García-Arias; Victor Hugo Borja-Aburto                                                                                                 |
| EPI_ISL_2942636, EPI_ISL_2942641, EPI_ISL_2940041, EPI_ISL_3805660, EPI_ISL_3805743                                                                                  | Unidad de Investigación Médica de Yucatán (UIMY)                                                                                                   | Unidad de Genómica Avanzada                                                                                          | ; Alejandra García-Gasca; Alejandra Hernandez-Teran; Alejandro Sanchez-Flores; Alfredo Herrera-Estrella; Alicia Ocaña-Mondragón; Andreu Comas-García; Angel Gustavo Salas-Lais; Antonio Loza Roman; Bernardo Martínez-Miguel; Blanca Taboada; Brenda Irasema Maldonado-Meza; Bruno Gomez-Gil; Carla Ivon Herrera-Najera; Carlos F. Arias; Celia Boukadida; Célida Duque Molina; Célida Martínez- Rodríguez; Clara Esperanza Santacruz-Tinoco; Concepción Grajales-Muñiz; Consorcio Mexicano de Vigilancia Genómica (CoVIGen-Mex). Authors (In alphabetical order): Julio Elias Alvarado-Yaah; Cristóbal Cháidez-Quiróz; Daniel Fregoso-Rueda; Daniel Lira Morales; Eduardo Becerril-Vargas; Fernando Fontove-Herrera; Fidencio Mejía-Nepomuceno; Francisco Pulido; Gloria Elena Espinosa-Ayala; Gloria María Molina-Salinas; Gloria Vazquez; Hector Esteban Paz-Juarez; Hector Montoya-Fuentes; Helen Haydee Fernanda Ramirez-Plascencia; Irvin González-Lopez; Jean Pierre Gonzalez; Jesus Hernandez; Joel Armando Vázquez-Pérez.; Jorge Salas-Hernandez; Jose Antonio Enciso-Moreno; Jose Arturo Martínez-Orozco; Jose Esteban Muñoz-Medina; Jose de Jesus Nuñez-Contreras; Juan Bautista Chale-Dzul; Julissa Enciso-Ibarra; Luis Alberto Ochoa-Carrera; Margarita Matias-Florentino; Maria Guadalupe Santiago-Mauricio; Maria Guadalupe de Jesus Mireles-Rivera; Mario Mujica-Sanchez; Marissa Perez-Garcia; Nelly Selem-Mojica; Pavel Isa; Ricardo Ciria Merce; Ricardo Grande; Rosa María Gutiérrez Ries; Santiago avila-Rios; Selene Zárate; Susana Lopez; Veronica Mata-Haro; Victor Eduardo García-Arias; Victor Hugo Borja-Aburto                                                                                                 |
| EPI_ISL_2490537                                                                                                                                                      | Unidad de Investigación Biomédica de Zacatecas (UIBZ)                                                                                              | Centro de Investigación en Enfermedades Infecciosas (CIENI), Instituto Nacional de Enfermedades Respiratorias (INER) | ; Alejandra García-Gasca; Alejandra Hernández-Terán; Alejandro Sánchez-Flores; Alfredo Herrera-Estrella; Alicia Ocaña-Mondragón; Andreu Comas-García; Angel Gustavo Salas-Lais; Antonio Loza Román; Bernardo Martínez-Miguel; Blanca Taboada; Brenda Irasema Maldonado-Meza; Bruno Gomez-Gil; Carla Ivón Herrera-Najera; Carlos F. Arias; Celia Boukadida; Clara Esperanza Santacruz-Tinoco; Concepción Grajales-Muñiz; Consorcio Mexicano de Vigilancia Genómica (CoVIGen-Mex). Authors (In alphabetical order): Julio Elias Alvarado-Yaah; Cristóbal Cháidez-Quiróz; Célida Duque Molina; Célida Martínez- Rodríguez; Daniel Fregoso-Rueda; Daniel Lira Morales; Eduardo Becerril-Vargas; Fernando Fontove-Herrera; Fidencio Mejía-Nepomuceno; Francisco Pulido; Gloria Elena Espinosa-Ayala; Gloria María Molina-Salinas; Gloria Vazquez; Hector Esteban Paz-Juárez; Hector Montoya-Fuentes; Helen Haydee Fernanda Ramirez-Plascencia; Irvin González-López; Jean Pierre González; Joel Armando Vázquez-Pérez.; Jorge Salas-Hernández; José Antonio Enciso-Moreno; José Arturo Martínez-Orozco; José Esteban Muñoz-Medina; José de Jesús Nuñez-Contreras; Juan Bautista Chale-Dzul; Julissa Enciso-Ibarra; Margarita Matias-Florentino; Mario Mújica-Sánchez; Marissa Perez-García; María Guadalupe Santiago-Mauricio; María Guadalupe de Jesús Mireles-Rivera; Nelly Sélem-Mojica; Pavel Isa; Ricardo Ciria Merce; Ricardo Grande; Rosa María Gutiérrez Ries; Santiago Avila-Rios; Selene Zárate; Susana Lopez; Victor Eduardo García-Arias; Victor Hugo Borja-Aburto                                                                                                                                                                  |
| EPI_ISL_3347603, EPI_ISL_3347906                                                                                                                                     | Unidad de Investigación Biomédica de Zacatecas (UIBZ)                                                                                              | Instituto de Biotecnología de la UNAM                                                                                | ; Alejandra García-Gasca; Alejandra Hernández-Terán; Alejandro Sánchez-Flores; Alejandro Sánchez-Flores; Alfredo Herrera-Estrella; Alicia Ocaña-Mondragón; Andreu Comas-García; Angel Gustavo Salas-Lais; Antonio Loza Román; Bernardo Martínez-Miguel; Blanca Taboada; Brenda Irasema Maldonado-Meza; Bruno Gómez-Gil; Carla Ivón Herrera-Najera; Carlos F. Arias; Celia Boukadida; Clara Esperanza Santacruz-Tinoco; Concepción Grajales-Muñiz; Consorcio Mexicano de Vigilancia Genómica (CoVIGen-Mex). Authors (In alphabetical order): Julio Elias Alvarado-Yaah; Cristóbal Cháidez-Quiróz; Célida Duque Molina; Célida Martínez- Rodríguez; Daniel Fregoso-Rueda; Daniel Lira Morales; Eduardo Becerril-Vargas; Fernando Fontove-Herrera; Fidencio Mejía-Nepomuceno; Francisco Pulido; Gloria Elena Espinosa-Ayala; Gloria María Molina-Salinas; Gloria Vazquez; Hector Esteban Paz-Juárez; Hector Montoya-Fuentes; Helen Haydee Fernanda Ramirez-Plascencia; Irvin González-López; Jean Pierre González; Joel Armando Vázquez-Pérez.; Jorge Salas-Hernández; José Antonio Enciso-Moreno; José Arturo Martínez-Orozco; José Esteban Muñoz-Medina; José de Jesús Nuñez-Contreras; Juan Bautista Chale-Dzul; Julissa Enciso-Ibarra; Margarita Matias-Florentino; Mario Mújica-Sánchez; Marissa Perez-García; María Guadalupe Santiago-Mauricio; María Guadalupe de Jesús Mireles-Rivera; Nelly Sélem-Mojica; Pavel Isa; Ricardo Ciria Merce; Ricardo Grande; Rosa María Gutiérrez Ries; Santiago Avila-Rios; Selene Zárate; Susana Lopez; Victor Eduardo García-Arias; Victor Hugo Borja-Aburto                                                                                                                                        |
| EPI_ISL_2402120, EPI_ISL_2402124                                                                                                                                     | Unidad de Investigación Biomédica de Zacatecas (UIBZ)                                                                                              | Unidad de Genómica Avanzada                                                                                          | ; Alejandra García-Gasca; Alejandra Hernández-Terán; Alejandro Sánchez-Flores; Alejandro Sánchez-Flores; Alfredo Herrera-Estrella; Alicia Ocaña-Mondragón; Andreu Comas-García; Angel Gustavo Salas-Lais; Antonio Loza Román; Bernardo Martínez-Miguel; Blanca Taboada; Brenda Irasema Maldonado-Meza; Carla Ivon Herrera-Najera; Carlos F. Arias; Celia Boukadida; Clara Esperanza Santacruz-Tinoco; Concepción Grajales-Muñiz; Consorcio Mexicano de Vigilancia Genómica (CoVIGen-Mex). Authors (In alphabetical order): Julio Elias Alvarado-Yaah; Cristóbal Cháidez-Quiróz; Célida Duque Molina; Célida Martínez- Rodríguez; Daniel Fregoso-Rueda; Daniel Lira Morales; Eduardo Becerril-Vargas; Fernando Fontove-Herrera; Fidencio Mejía-Nepomuceno; Francisco Pulido; Gloria Elena Espinosa-Ayala; Gloria María Molina-Salinas; Gloria Vazquez; Hector Esteban Paz-Juárez; Hector Montoya-Fuentes; Helen Haydee Fernanda Ramirez-Plascencia; Irvin González-López; Jean Pierre González; Joel Armando Vázquez-Pérez.; Jorge Salas-Hernández; José Antonio Enciso-Moreno; José Arturo Martínez-Orozco; José Esteban Muñoz-Medina; José de Jesús Nuñez-Contreras; Juan Bautista Chale-Dzul; Julissa Enciso-Ibarra; Kathia Elizabeth Tapia-Díaz; Luis Alberto Ochoa-Carrera; Margarita Matias-Florentino; Mario Mújica-Sánchez; Marissa Perez-García; María Guadalupe Santiago-Mauricio; María Guadalupe de Jesús Mireles-Rivera; Nelly Sélem-Mojica; Pavel Isa; Ricardo Ciria Merce; Ricardo Grande; Rosa María Gutiérrez Ries; Santiago Avila-Rios; Selene Zárate; Susana Lopez; Verónica Mata-Haro; Victor Eduardo García-Arias; Victor Hugo Borja-Aburto                                                                            |
| EPI_ISL_2490368, EPI_ISL_2490474, EPI_ISL_3556968                                                                                                                    | Unidad de Investigación Médica de Yucatán (UIMY)                                                                                                   | Centro de Investigación en Enfermedades Infecciosas (CIENI), Instituto Nacional de Enfermedades Respiratorias (INER) | ; Alejandra García-Gasca; Alejandra García-Gasca; Alejandra Hernández-Terán; Alejandro Sánchez-Flores; Alejandro Sánchez-Flores; Alfredo Herrera-Estrella; Alicia Ocaña-Mondragón; Andreu Comas-García; Angel Gustavo Salas-Lais; Antonio Loza Román; Bernardo Martínez-Miguel; Blanca Taboada; Brenda Irasema Maldonado-Meza; Bruno Gomez-Gil; Bruno Gómez-Gil; Carla Ivón Herrera-Najera; Carlos F. Arias; Celia Boukadida; Clara Esperanza Santacruz-Tinoco; Concepción Grajales-Muñiz; Consorcio Mexicano de Vigilancia Genómica (CoVIGen-Mex). Authors (In alphabetical order): Julio Elias Alvarado-Yaah; Cristóbal Cháidez-Quiróz; Célida Duque Molina; Célida Martínez- Rodríguez; Daniel Fregoso-Rueda; Daniel Lira Morales; Eduardo Becerril-Vargas; Fernando Fontove-Herrera; Fidencio Mejía-Nepomuceno; Francisco Pulido; Gloria Elena Espinosa-Ayala; Gloria María Molina-Salinas; Gloria Vazquez; Hector Esteban Paz-Juárez; Hector Montoya-Fuentes; Helen Haydee Fernanda Ramirez-Plascencia; Irvin González-López; Jean Pierre González; Jesus Hernández; Joel Armando Vázquez-Pérez.; Jorge Salas-Hernández; José Antonio Enciso-Moreno; José Arturo Martínez-Orozco; José Esteban Muñoz-Medina; José de Jesús Nuñez-Contreras; Juan Bautista Chale-Dzul; Julissa Enciso-Ibarra; Kathia Elizabeth Tapia-Díaz; Luis Alberto Ochoa-Carrera; Margarita Matias-Florentino; Mario Mújica-Sánchez; Marissa Perez-García; María Guadalupe Santiago-Mauricio; María Guadalupe de Jesús Mireles-Rivera; Nelly Sélem-Mojica; Pavel Isa; Ricardo Ciria Merce; Ricardo Grande; Rosa María Gutiérrez Ries; Santiago Avila-Rios; Selene Zárate; Susana Lopez; Verónica Mata-Haro; Victor Eduardo García-Arias; Victor Hugo Borja-Aburto |
| EPI_ISL_2391578, EPI_ISL_2681363                                                                                                                                     | Unidad de Investigación Médica de Yucatán (UIMY)                                                                                                   | Instituto de Biotecnología de la UNAM                                                                                | ; Alejandra García-Gasca; Alejandra García-Gasca; Alejandra Hernández-Terán; Alejandro Sánchez-Flores; Alejandro Sánchez-Flores; Alfredo Herrera-Estrella; Alicia Ocaña-Mondragón; Andreu Comas-García; Angel Gustavo Salas-Lais; Antonio Loza Román; Bernardo Martínez-Miguel; Blanca Taboada; Brenda Irasema Maldonado-Meza; Bruno Gomez-Gil; Bruno Gómez-Gil; Carla Ivón Herrera-Najera; Carlos F. Arias; Celia Boukadida; Clara Esperanza Santacruz-Tinoco; Concepción Grajales-Muñiz; Consorcio Mexicano de Vigilancia Genómica (CoVIGen-Mex). Authors (In alphabetical order): Julio Elias Alvarado-Yaah; Cristóbal Cháidez-Quiróz; Célida Duque Molina; Célida Martínez- Rodríguez; Daniel Fregoso-Rueda; Daniel Lira Morales; Eduardo Becerril-Vargas; Fernando Fontove-Herrera; Fidencio Mejía-Nepomuceno; Francisco Pulido; Gloria Elena Espinosa-Ayala; Gloria María Molina-Salinas; Gloria Vazquez; Hector Esteban Paz-Juárez; Hector Montoya-Fuentes; Helen Haydee Fernanda Ramirez-Plascencia; Irvin González-López; Jean Pierre González; Jesus Hernández; Joel Armando Vázquez-Pérez.; Jorge Salas-Hernández; José Antonio Enciso-Moreno; José Arturo Martínez-Orozco; José Esteban Muñoz-Medina; José de Jesús Nuñez-Contreras; Juan Bautista Chale-Dzul; Julissa Enciso-Ibarra; Luis Alberto Ochoa-Carrera; Margarita Matias-Florentino; Mario Mújica-Sánchez; Marissa Perez-García; María Guadalupe Santiago-Mauricio; María Guadalupe de Jesús Mireles-Rivera; Nelly Sélem-Mojica; Pavel Isa; Ricardo Ciria Merce; Ricardo Grande; Rosa María Gutiérrez Ries; Santiago Avila-Rios; Selene Zárate; Susana Lopez; Verónica Mata-Haro; Victor Eduardo García-Arias; Victor Hugo Borja-Aburto                              |
| EPI_ISL_775358                                                                                                                                                       | Unilabs Laboratory Medicine                                                                                                                        | Norwegian Institute of Public Health, Department of Virology                                                         | Atiya R Ali; Hilde Elshaug; Hilde Vollan; Kamilla Heddeland Instefjord; Karoline Bragstad; Kathrine Stene-Johansen; Marie Paulsen Madsen; Olav Hungnes; Rasmus Riis Kopperud                                                                                                                                                                                                                                                                                                                                                                                                                                                                                                                                                                                                                                                                                                                                                                                                                                                                                                                                                                                                                                                                                                                                                                                                                                                                                                                                                                                                                                                                                                                                                               |
| EPI_ISL_763000                                                                                                                                                       | Unit 17: Influenza & Other Respiratory Viruses, German National Influenza Center                                                                   | Project group Epidemiology of Highly Pathogenic Microorganisms, Robert Koch-Institute                                | Andreas Sachse; Ariane Düx; Djin-Ye Oh; Fabian Leendertz; Grit Schubert; Marianne Wedde; Ralf Dürrwald; Sébastien Calvignac-Spencer; Thorsten Wolff                                                                                                                                                                                                                                                                                                                                                                                                                                                                                                                                                                                                                                                                                                                                                                                                                                                                                                                                                                                                                                                                                                                                                                                                                                                                                                                                                                                                                                                                                                                                                                                        |
| EPI_ISL_3123559, EPI_ISL_3123560, EPI_ISL_3123564, EPI_ISL_3123566                                                                                                   | Unit of laboratory surveillance of viral emergent disease Control of Communicable Diseases Department, National Institute of Public Health Albania | Charité Universitätsmedizin Berlin, Institut für Virologie                                                           | Barbara Mühlemann; Christian Drosten; Iris Haslra; Julia Schneider; Jörn Beheim-Schwarzbach; Talitha Veith; Terry Jones; Victor M Corman                                                                                                                                                                                                                                                                                                                                                                                                                                                                                                                                                                                                                                                                                                                                                                                                                                                                                                                                                                                                                                                                                                                                                                                                                                                                                                                                                                                                                                                                                                                                                                                                   |
| EPI_ISL_812310                                                                                                                                                       | United States Air Force School of Aerospace Medicine                                                                                               | United States Air Force School of Aerospace Medicine                                                                 | Amanda Javorina; Anthony Fries; Clarise Starr; Elizabeth Macias; Jennifer Meyer; Sarah Purves; William Gruner                                                                                                                                                                                                                                                                                                                                                                                                                                                                                                                                                                                                                                                                                                                                                                                                                                                                                                                                                                                                                                                                                                                                                                                                                                                                                                                                                                                                                                                                                                                                                                                                                              |
| EPI_ISL_2823743                                                                                                                                                      | Unity Health Toronto                                                                                                                               | Ontario Institute for Cancer Research                                                                                | Bernard Lam; Felicia Vincelli; Illica Lungu; Jared T. Simpson; Jeremy Johns; Karel Boissinot; Nayna M. Matukas; Le Luu; Mark Downing; Paul Krzyzanowski; Philip Zuzarte; Ramzi Fattouh; Richard de Borja; Samira Mubareka; TIBDN; Trina Otterman; Yan Chen                                                                                                                                                                                                                                                                                                                                                                                                                                                                                                                                                                                                                                                                                                                                                                                                                                                                                                                                                                                                                                                                                                                                                                                                                                                                                                                                                                                                                                                                                 |
| EPI_ISL_3023831                                                                                                                                                      | Universidad Autonoma de Yucatan                                                                                                                    | New York Genome Center                                                                                               | Amy Baldwin; Andre Corveilo; Aviles-Gomez E; Ayora-Talavera G; Chan-Gasca M; Dayna M. Otschwald; Flores-Quintal F; Granja-Perez P.; Lopez-Coral L.; Michael Zody; Samantha Fennessey; Tom Maniatis; Villanueva-Jorge S; Yam-Pool E                                                                                                                                                                                                                                                                                                                                                                                                                                                                                                                                                                                                                                                                                                                                                                                                                                                                                                                                                                                                                                                                                                                                                                                                                                                                                                                                                                                                                                                                                                         |
| EPI_ISL_3076941                                                                                                                                                      | University Clinical Hospital of Mostar, Department of Microbiology and Molecular Diagnostics                                                       | University of Sarajevo, Veterinary Faculty, Laboratory for Molecular Diagnostic and Research Laboratory              | Goletic S.; Goletic T.; Hodzic A.; Jazic A.; Nicevic M.; Ostojic M.; Sabic E.; Softic A.; Terzic I.                                                                                                                                                                                                                                                                                                                                                                                                                                                                                                                                                                                                                                                                                                                                                                                                                                                                                                                                                                                                                                                                                                                                                                                                                                                                                                                                                                                                                                                                                                                                                                                                                                        |
| EPI_ISL_2895002                                                                                                                                                      | University College Hospital, Ibadan                                                                                                                | African Centre of Excellence for Genomics of Infectious Diseases (ACEGID), Redeemer's University, Nigeria            | A.T.; Abechi; Ajogbasile; Akano; C.A.; C.T.; Eromon; F.V.; Folarin, O.; Fowotade, A.; Happi; I.B.; J.M.; J.U.; K.O.; Kayode; Nosamefian, I.; Oguzie; Olawoye; Olumade; Oluiniyi; P.E.; P.S.; T.J.; Ugwu; Uwanibe                                                                                                                                                                                                                                                                                                                                                                                                                                                                                                                                                                                                                                                                                                                                                                                                                                                                                                                                                                                                                                                                                                                                                                                                                                                                                                                                                                                                                                                                                                                           |
| EPI_ISL_3570553                                                                                                                                                      | University College London, Great Ormond Street Hospital for Children NHS Foundation Trust, Imperial College Healthcare NHS Trust                   | COVID-19 Genomics UK (COG-UK) Consortium                                                                             | Charlotte Williams; Helena Tutill; Judith Breuer; Marius Cotic; Mark Kristiansen; Nadua Bayzid; Patricia Dyal; Rachel Williams; Sergi Castellano; Sunando Roy                                                                                                                                                                                                                                                                                                                                                                                                                                                                                                                                                                                                                                                                                                                                                                                                                                                                                                                                                                                                                                                                                                                                                                                                                                                                                                                                                                                                                                                                                                                                                                              |
| EPI_ISL_3739726                                                                                                                                                      | University Hospital Brno, OKMI                                                                                                                     | University Hospital Brno, CMBG                                                                                       | Jan Svaton; Kristyna Dufkova; Martina Lengerova; Matej Bezdicke; Pavlína Volfova                                                                                                                                                                                                                                                                                                                                                                                                                                                                                                                                                                                                                                                                                                                                                                                                                                                                                                                                                                                                                                                                                                                                                                                                                                                                                                                                                                                                                                                                                                                                                                                                                                                           |
| EPI_ISL_2104489, EPI_ISL_2343089                                                                                                                                     | University Hospitals of Geneva, Laboratory of Virology                                                                                             | HUG, Laboratory of Virology and the Health2030 Genome Center                                                         | Ana Rita Goncalves; Deborah Penet; Emmanouil Dermitzakis; Henri Peugeot; Ioannis Xenarios; Keith Harshman; Laurent Kaiser; Lorenzo Cerutti; Melyssa Elies; Samuel Cordey                                                                                                                                                                                                                                                                                                                                                                                                                                                                                                                                                                                                                                                                                                                                                                                                                                                                                                                                                                                                                                                                                                                                                                                                                                                                                                                                                                                                                                                                                                                                                                   |
| EPI_ISL_671431                                                                                                                                                       | University of Debrecen, Department of Medical Microbiology                                                                                         | National Laboratory of Virology, Szentágotthai Research Centre                                                       | Balázs Somogyi; Brigitta Zana; Endre Gábor Tóth; Eszter Csoma; Ferenc Jakab; Gábor Kemenesi                                                                                                                                                                                                                                                                                                                                                                                                                                                                                                                                                                                                                                                                                                                                                                                                                                                                                                                                                                                                                                                                                                                                                                                                                                                                                                                                                                                                                                                                                                                                                                                                                                                |
| EPI_ISL_3483805, EPI_ISL_3483878, EPI_ISL_3484042, EPI_ISL_3484089                                                                                                   | University of Health Sciences                                                                                                                      | Quadram Institute Bioscience                                                                                         | Aamir Ashiq; Abdul Sattar; Alexander J Trotter; Alison E. Mather; Almira Shafiq; Alp Aydin; Ana P. Tedim; Anastasia Kolyva; Andrew Bell; Andrew J. Page; Asghar Javeed; Claire Stuart; Dave J. Baker; Gemma L. Kay; Hazir Rahman; Javed Akram; John Wain; Justin Grady; Khushbakht kirm; Leonardo de Oliveira Martins; Lizzie Meadows; Maria Diaz; Mark Webber; Muhammad Asif Naveed; Muhammad Bilal Sarwar; Muhammad Nawaz; Muhammad Roman; Muhammad Shahbaz Hussain; Muhammad Yasir; Muhmmad Ilyas; Nabil-Fareed Alikhan; Nadeem Afzal; Nadia Mukhtar; Naila Tariq; Ngozi Elumogo; Nicholas M. Thomson; Qadeer Ahmad; Rachael Stanley; Rachel Gilroy; Reenesh Prakash; Samir Dervisevic; Samuel Bloomfield; Shah Jahan; Sidra-tul-muntaha; Steven Rudder; Tahir Yaqoob; Thanh Le-Viet; Waseem Iqbal; Zahid Latif                                                                                                                                                                                                                                                                                                                                                                                                                                                                                                                                                                                                                                                                                                                                                                                                                                                                                                                         |
| EPI_ISL_2224303, EPI_ISL_3758388                                                                                                                                     | University of Mississippi Medical Center, Department of Pathology                                                                                  | University of Mississippi Medical Center, Molecular and Genomics Core Facility                                       | Ashley C. Johnson; D. Ashley Robinson; Ithiel J. Frame; Krishna K. Ayyalasomayajula; Michael R. Garrett; Wenjie Wu                                                                                                                                                                                                                                                                                                                                                                                                                                                                                                                                                                                                                                                                                                                                                                                                                                                                                                                                                                                                                                                                                                                                                                                                                                                                                                                                                                                                                                                                                                                                                                                                                         |
| EPI_ISL_955150                                                                                                                                                       | University of Sarajevo, Veterinary Faculty, Laboratory for Molecular Diagnostic and Research Laboratory                                            | University of Sarajevo, Veterinary Faculty, Laboratory for Molecular Diagnostic and Research Laboratory              | Alić-Šeho A.; Goletić T.; Goletić Š.; Hodžić A.; Jažić A.; Nicević M.; Softić A.; Terzić I.; Šabić E.                                                                                                                                                                                                                                                                                                                                                                                                                                                                                                                                                                                                                                                                                                                                                                                                                                                                                                                                                                                                                                                                                                                                                                                                                                                                                                                                                                                                                                                                                                                                                                                                                                      |
| EPI_ISL_3099079                                                                                                                                                      | University of South Bohemia, Faculty of Science                                                                                                    | State Veterinary Institute Prague                                                                                    | Alexander Nagy; Hana Maskova; Jan Sterba; Jindrich Chmelar; Lenka Cernikova; Martina Stara                                                                                                                                                                                                                                                                                                                                                                                                                                                                                                                                                                                                                                                                                                                                                                                                                                                                                                                                                                                                                                                                                                                                                                                                                                                                                                                                                                                                                                                                                                                                                                                                                                                 |
| EPI_ISL_476078, EPI_ISL_677760                                                                                                                                       | University of Szeged, Institute of Clinical Microbiology                                                                                           | National Laboratory of Virology, Szentágotthai Research Centre                                                       | Balázs Somogyi; Brigitta; Brigitta Zana; Endre Gábor Tóth; Ferenc Jakab; Gabriella Terhes; Gábor Kemenesi; Terhes Gabriella                                                                                                                                                                                                                                                                                                                                                                                                                                                                                                                                                                                                                                                                                                                                                                                                                                                                                                                                                                                                                                                                                                                                                                                                                                                                                                                                                                                                                                                                                                                                                                                                                |
| EPI_ISL_3825375                                                                                                                                                      | University of Wisconsin-Madison AIDS Vaccine Research Laboratories                                                                                 | University of Wisconsin-Madison AIDS Vaccine Research Laboratories                                                   | Gage Moreno; Katarina Braun; et al. AIDS Vaccine Research Laboratories                                                                                                                                                                                                                                                                                                                                                                                                                                                                                                                                                                                                                                                                                                                                                                                                                                                                                                                                                                                                                                                                                                                                                                                                                                                                                                                                                                                                                                                                                                                                                                                                                                                                     |
| EPI_ISL_977357, EPI_ISL_977379, EPI_ISL_977411, EPI_ISL_977469, EPI_ISL_2803586, EPI_ISL_2803663, EPI_ISL_2803712, EPI_ISL_2803718, EPI_ISL_2803721, EPI_ISL_2803734 | University of Zambia, School of Veterinary Medicine                                                                                                | UNZAVET and PATH                                                                                                     | Daniel Bridges; Muluenga Mwenda-Chimfwembe; Ngonda Saasa; ZNPH and ZGSC                                                                                                                                                                                                                                                                                                                                                                                                                                                                                                                                                                                                                                                                                                                                                                                                                                                                                                                                                                                                                                                                                                                                                                                                                                                                                                                                                                                                                                                                                                                                                                                                                                                                    |



|                                                                                                                                                                                                                                                                               |                                                                                                 |                                                                                                                                                                                                                                         |                                                                                                                                                                                                                                                                                                                                                                                                                                                                                                                                                                                                                                                                                                            |
|-------------------------------------------------------------------------------------------------------------------------------------------------------------------------------------------------------------------------------------------------------------------------------|-------------------------------------------------------------------------------------------------|-----------------------------------------------------------------------------------------------------------------------------------------------------------------------------------------------------------------------------------------|------------------------------------------------------------------------------------------------------------------------------------------------------------------------------------------------------------------------------------------------------------------------------------------------------------------------------------------------------------------------------------------------------------------------------------------------------------------------------------------------------------------------------------------------------------------------------------------------------------------------------------------------------------------------------------------------------------|
| EPI_ISL_1692773                                                                                                                                                                                                                                                               | Università Federico II - Dipartimento di scienze mediche traslazionali - Napoli                 | Telethon Institute of Genetics and Medicine (TIGEM)                                                                                                                                                                                     | Antonio Grimaldi Patrizia Annunziata Francesco Panariello Teresa Giuliano Michele Cennamo Valentina Bouche Chiara Colantuono Lucio Di Filippo Mariano Fiorenza Anna Manfredi Marcello Salvi Giuseppe Portella Andrea Ballabio Davide Cacchiarelli                                                                                                                                                                                                                                                                                                                                                                                                                                                          |
| EPI_ISL_3546572                                                                                                                                                                                                                                                               | Universität Innsbruck, Institut für Mikrobiologie                                               | Berghthaler laboratory, CeMM Research Center for Molecular Medicine of the Austrian Academy of Sciences                                                                                                                                 | Andreas Berghthaler; Anna Schedl; Bekir Erguner; Benedikt Agerer; Christoph Bock; Fabian Amman; Jan Laine; Lukas Endler; Maelle Le Moing; Martin Senekowitsch; Matthew Thornton; Michael Schuster; Petr Triska; Thomas Penz                                                                                                                                                                                                                                                                                                                                                                                                                                                                                |
| EPI_ISL_3667037                                                                                                                                                                                                                                                               | Uniwersyteckie Centrum Kliniczne                                                                | WSSEw Warszawie                                                                                                                                                                                                                         | Dorota Wagrocka - Roczniak                                                                                                                                                                                                                                                                                                                                                                                                                                                                                                                                                                                                                                                                                 |
| EPI_ISL_513699,<br>EPI_ISL_2291699,<br>EPI_ISL_3263632,<br>EPI_ISL_3833149                                                                                                                                                                                                    | Utah Public Health Laboratory                                                                   | Utah Public Health Laboratory                                                                                                                                                                                                           | Erin L. Young; Erin Young; Heidi Butz; Kelly F. Oakeson; Kelly Oakeson; Olinto Linares-Perdomo; Pooja Gupta; Tara Gallagher                                                                                                                                                                                                                                                                                                                                                                                                                                                                                                                                                                                |
| EPI_ISL_3045997,<br>EPI_ISL_3046033                                                                                                                                                                                                                                           | VIDOH                                                                                           | Grubaugh Lab - Yale School of Public Health                                                                                                                                                                                             | Anderson Brito; Annie Watkins; Brett Ellis; Chaney Kalinich; Chantal Vogels; Esther Ellis; Isabel Ott; Jendai Richards; Jessica Rothman; Joseph Fauver; Kendall Billig; Mallery Breban; Marlon Lawrence; Mary Petrone; Nathan Grubaugh; TaLesá Aderohunmu; Tara Alpert; Tobias Koch                                                                                                                                                                                                                                                                                                                                                                                                                        |
| EPI_ISL_3347344,<br>EPI_ISL_3841007                                                                                                                                                                                                                                           | VIDOH (Virgin Islands Department of Health)                                                     | Grubaugh Lab - Yale School of Public Health                                                                                                                                                                                             | Anderson Brito; Annie Watkins; Brett Ellis; Chaney Kalinich; Chantal Vogels; Esther Ellis; Isabel Ott; Jendai Richards; Jessica Rothman; Joseph Fauver; Kendall Billig; Mallery Breban; Marlon Lawrence; Mary Petrone; Nathan Grubaugh; TaLesá Aderohunmu; Tara Alpert; Tobias Koch                                                                                                                                                                                                                                                                                                                                                                                                                        |
| EPI_ISL_1095188                                                                                                                                                                                                                                                               | VT Dept. of Health Laboratory                                                                   | Respiratory Viruses Branch, Division of Viral Diseases, Centers for Disease Control and Prevention                                                                                                                                      | Anna Montmayeur; Anna Uehara; Ben L. Rambo-Martin; Clinton R. Paden; Dhvani Batra; Haibin Wang; Jasmine Padilla; Jing Zhang; Justin Lee; Krista Queen; Lori Rowe; Mark Burroughs; Mili Sheth; Peter W. Cook; Rachel Marine; Sarah Nobles; Suxiang Tong; Yan Li; Ying Tao                                                                                                                                                                                                                                                                                                                                                                                                                                   |
| EPI_ISL_3725871                                                                                                                                                                                                                                                               | VUMC Molecular Infectious Diseases Laboratory (MIDL)                                            | Dr. Suman Das Lab - Vanderbilt University Medical Center (VUMC) (https://my.vanderbilt.edu/daslab/)                                                                                                                                     | Bookyung Park; Grant Vestal; Helen Boone; Hunter Brown; Jonathan E. Schmitz; Meghan Shilts; Seesandra Rajagopala; Suman B. Pakala; Suman Das                                                                                                                                                                                                                                                                                                                                                                                                                                                                                                                                                               |
| EPI_ISL_2360475                                                                                                                                                                                                                                                               | Vaccines and Infectious Diseases Analytics Research Unit (VIDA)                                 | KRISP, KZn Research Innovation and Sequencing Platform                                                                                                                                                                                  | Baillie Vicky; Giandhari Jennifer; Madhi Shabir; Naidoo Yeshnee; Pillay Sureshnee; San James; Tegally Houriiyah; Wilkinson Eduan; de Oliveira Tulio; du Plessis Jeanine                                                                                                                                                                                                                                                                                                                                                                                                                                                                                                                                    |
| EPI_ISL_2425984                                                                                                                                                                                                                                                               | Vestfold Hospital, Toensberg Department of Microbiology                                         | Norwegian Institute of Public Health, Department of Virology                                                                                                                                                                            | Atiya R Ali; Debec Nadia; Engebretsen Serina Beate; García Llorente Ignacio; Hilde Elshaug; Hilde Vollan; Jon Bråte; Kamilla Heddeland Instefjord; Karoline Bragstad; Kathrine Stene-Johansen; Line Victoria Moen; Marie Paulsen Madsen; Olav Hungnes; Pedersen Benedikte Nevjen; Rasmus Riis Kopperud                                                                                                                                                                                                                                                                                                                                                                                                     |
| EPI_ISL_3259626                                                                                                                                                                                                                                                               | Victor Babes Hospital                                                                           | National Institute of Infectious Diseases-Prof. Dr. Matei Bals Molecular Diagnostics Laboratory                                                                                                                                         | Corina Casangiu; Dan Otelea; Leontina Banica; Marius Surlea; Ovidiu Vlaicu; Petre Milu; Robert Hohan; Simona Paraschiv                                                                                                                                                                                                                                                                                                                                                                                                                                                                                                                                                                                     |
| EPI_ISL_426723                                                                                                                                                                                                                                                                | Victorian Infectious Diseases Reference Laboratory (VIDRL)                                      | Microbiological Diagnostic Unit Public Health Laboratory and Victorian Infectious Diseases Reference Laboratory, Doherty Institute                                                                                                      | Caly L.; Druce J.; Sait, M.; Schultz M.; Seemann T.; Sherry, N.                                                                                                                                                                                                                                                                                                                                                                                                                                                                                                                                                                                                                                            |
| EPI_ISL_480637, EPI_ISL_591890, EPI_ISL_779632, EPI_ISL_1913212,<br>see above                                                                                                                                                                                                 | Victorian Infectious Diseases Reference Laboratory (VIDRL)                                      | VIDRL and MDU-PHL                                                                                                                                                                                                                       | Caly L.; Druce J.; M. B.; M. L.; Sait, M.; Schultz; Schultz M.; Seemann T.; Sherry; Sherry, N.                                                                                                                                                                                                                                                                                                                                                                                                                                                                                                                                                                                                             |
| EPI_ISL_416411,<br>EPI_ISL_419734                                                                                                                                                                                                                                             | Victorian Infectious Diseases Reference Laboratory (VIDRL)                                      | Victorian Infectious Diseases Reference Laboratory and Microbiological Diagnostic Unit Public Health Laboratory, Doherty Institute                                                                                                      | Caly L.; Druce J.; Sait, M.; Schultz M.; Seemann T.; Sherry, N.; Taiaroa, G.                                                                                                                                                                                                                                                                                                                                                                                                                                                                                                                                                                                                                               |
| EPI_ISL_2694098                                                                                                                                                                                                                                                               | Viesoji istaiga Klaipėdos universitetinė ligoninė                                               | National Public Health Surveillance Laboratory                                                                                                                                                                                          | Ana Steponkiene; Danas Baksa; Jelena Razmuk; Lukas Vasionis; Lukas Zemaitis; Migle Gabrielaite; Svajune Muralyte                                                                                                                                                                                                                                                                                                                                                                                                                                                                                                                                                                                           |
| EPI_ISL_3863396                                                                                                                                                                                                                                                               | Viesoji istaiga Respublikinė Siauliu ligoninė                                                   | National Public Health Surveillance Laboratory                                                                                                                                                                                          | Ana Steponkiene; Danas Baksa; Jelena Razmuk; Lukas Vasionis; Lukas Zemaitis; Migle Gabrielaite; Svajune Muralyte                                                                                                                                                                                                                                                                                                                                                                                                                                                                                                                                                                                           |
| EPI_ISL_3711353                                                                                                                                                                                                                                                               | Viesoji istaiga Vilniaus universiteto ligoninė Santaros klinikos                                | National Public Health Surveillance Laboratory                                                                                                                                                                                          | Ana Steponkiene; Danas Baksa; Jelena Razmuk; Lukas Vasionis; Lukas Zemaitis; Migle Gabrielaite; Svajune Muralyte                                                                                                                                                                                                                                                                                                                                                                                                                                                                                                                                                                                           |
| EPI_ISL_2339764,<br>EPI_ISL_2428847,<br>EPI_ISL_2510745                                                                                                                                                                                                                       | Viesoji istaiga Vilniaus universiteto ligoninė Santaros klinikos                                | Vilnius University Hospital Santaros Klinikos, Center of Laboratory Medicine                                                                                                                                                            | Daniel Naumovas; Dovile Ezerskyte; Gytis Dudas; Ingrida Olendraite; Laimonas Griskevicius; Ligita Raugaite; Mindaugas Stoskus; Monika Katenaite; Rimvydas Norvilas                                                                                                                                                                                                                                                                                                                                                                                                                                                                                                                                         |
| EPI_ISL_3341256                                                                                                                                                                                                                                                               | Viešoji istaiga Vilniaus universiteto ligoninė Santaros klinikos                                | National Public Health Surveillance Laboratory                                                                                                                                                                                          | Ana Steponkiene; Danas Baksa; Jelena Razmuk; Lukas Vasionis; Lukas Zemaitis; Migle Gabrielaite; Svajune Muralyte                                                                                                                                                                                                                                                                                                                                                                                                                                                                                                                                                                                           |
| EPI_ISL_933829                                                                                                                                                                                                                                                                | Vilnius university hospital Santaros Klinikos, Center of Laboratory Medicine                    | Vilnius university hospital Santaros Klinikos, Center of Laboratory Medicine                                                                                                                                                            | Daniel Naumovas; Dovile Ezerskyte; Gytis Dudas; Ingrida Olendraite; Justinas Slikas; Rimvydas Norvilas                                                                                                                                                                                                                                                                                                                                                                                                                                                                                                                                                                                                     |
| EPI_ISL_1913959                                                                                                                                                                                                                                                               | Viollier AG                                                                                     | Department of Biosystems Science and Engineering, ETH Zurich                                                                                                                                                                            | Chaoran Chen; Christiane Beckmann; Christoph Noppen; David Dreifuss; Deborah Penet; Emmanouil Dermitzakis; Henri Pegeot; Ioannis Xenarios; Ivan Topolsky; Katharina Jahn; Keith Harshman; Lara Fuhrmann; Lorenzo Cerutti; Maurice Redondo; Niko Beerenwinkel; Noemie Santamaria de Souza; Olivier Kobel; Philipp Jablonski; Sarah Nadeau; Sophie Seidel; Tanja Stadler                                                                                                                                                                                                                                                                                                                                     |
| EPI_ISL_466959, EPI_ISL_1001477, EPI_ISL_1002431, EPI_ISL_1260458, EPI_ISL_2212174, EPI_ISL_2212240, EPI_ISL_2462597,<br>see above                                                                                                                                            | Viollier AG                                                                                     | Department of Biosystems Science and Engineering, ETH Zürich                                                                                                                                                                            | Andrea Patrignani; Andreia Cabral de Gouvea; Catharine Aquino; Chaoran Chen; Christian Beisel; Christiane Beckmann; Christoph Noppen; Daniel Ehrsam; David Dreifuss; Doris Popovic; Elodie Burcklen; Griffin White; Ina Nissen; Isabel Stürmer; Ivan Topolsky; Jay Tracy; Katharina Jahn; Kim Philipp Jablonski; Lara Fuhrmann; Laura Neff; Lennart Opitz; Louis du Plessis; Maria Domenica Moccia; Maurice Redondo; Mirjam Feldkamp; Natascha Santacroce; Niko Beerenwinkel; Noemie Santamaria de Souza; Olivier Kobel; Pedro Ferreira; Philipp Jablonski; Ralph Schlapbach; Rebecca Denes; Sarah Nadeau; Simon Grüter; Sophie Seidel; Susana Posada-Céspedes; Tanja Stadler; Timothy Sykes; Tobias Schär |
| EPI_ISL_2017861                                                                                                                                                                                                                                                               | Viral Respiratory Infections Laboratory, Cantacuzino National Military-Medical Institute        | Cantacuzino Institute Virology                                                                                                                                                                                                          | Catalina Pascu; Luiza Ustea; Mihaela Lazar; Mihaela Oprea; Nicoleta Paraschiv; Sorin Dinu                                                                                                                                                                                                                                                                                                                                                                                                                                                                                                                                                                                                                  |
| EPI_ISL_420851, EPI_ISL_2135840, EPI_ISL_2135845, EPI_ISL_2966635, EPI_ISL_2966637, EPI_ISL_2966640, EPI_ISL_2966644, EPI_ISL_2966653, EPI_ISL_2966656, EPI_ISL_2968556, EPI_ISL_2968689, EPI_ISL_2968726, EPI_ISL_3086912, EPI_ISL_3086923, EPI_ISL_3086927, EPI_ISL_3086928 | Viral Respiratory Lab, National Institute for Biomedical Research (INRB)                        | Pathogen Sequencing Lab, National Institute for Biomedical Research (INRB)                                                                                                                                                              | Allison Black; Amuri Aziza; Andrew Rambaut; Catherine Pratt; Eddy Kinganda-Lusamaki; Edith Nkwembe; Emmanuel Lokilo Lofiko; Francisca Muyembe Mawete; Gabriel Kabamba; Ian Goodfellow; James Hadfield; Jean Claude Makangara; Jean-Jacques Muyembe Tamfum; Josh Quick; Kristian Andersen; Matthias Pauthner; Michael Wiley; Nick Loman; Placide Mbala-Kingebeni; Raphaël Lumembe; Steve Ahuka-Mundeke; Trevor Bedford                                                                                                                                                                                                                                                                                      |
| EPI_ISL_2920804                                                                                                                                                                                                                                                               | Virginia Division of Consolidated Laboratory Services                                           | Virginia Division of Consolidated Laboratory Services                                                                                                                                                                                   | Virginia Division of Consolidated Laboratory Services                                                                                                                                                                                                                                                                                                                                                                                                                                                                                                                                                                                                                                                      |
| EPI_ISL_914842                                                                                                                                                                                                                                                                | Virginia Division of Consolidated Laboratory Services (DCLS)                                    | Virginia Division of Consolidated Laboratory Services (DCLS)                                                                                                                                                                            | Virginia DCLS                                                                                                                                                                                                                                                                                                                                                                                                                                                                                                                                                                                                                                                                                              |
| EPI_ISL_2834930,<br>EPI_ISL_2834932                                                                                                                                                                                                                                           | Virology Department, Central Health Laboratory                                                  | Central Health Laboratory, Victoria Hospital, Candos, Ministry of Health and Wellness, Mauritius                                                                                                                                        | Bahadoor BS; Jannoo N; Manraj SS; Mathur H; Ramuth M; Sonoo J; Sujeewon C                                                                                                                                                                                                                                                                                                                                                                                                                                                                                                                                                                                                                                  |
| EPI_ISL_2499903,<br>EPI_ISL_2499914,<br>EPI_ISL_2657332,<br>EPI_ISL_2657343,<br>EPI_ISL_2657346                                                                                                                                                                               | Virology Department, Central Health Laboratory                                                  | The Francis Crick Institute                                                                                                                                                                                                             | Bahadoor BS; Crawford M; Daniels RS; Goldstone R; Harvey R; Manraj SS; Nicod J; Patel H; Ramuth M; Sonoo J                                                                                                                                                                                                                                                                                                                                                                                                                                                                                                                                                                                                 |
| EPI_ISL_3231384                                                                                                                                                                                                                                                               | Virology Department, Central Health Laboratory                                                  | UMR PIMIT                                                                                                                                                                                                                               | Bahadoor BS; David Wilkinson; Manraj SS; Patrick Mavingui; Ramuth M; Sonoo J                                                                                                                                                                                                                                                                                                                                                                                                                                                                                                                                                                                                                               |
| EPI_ISL_3839615,<br>EPI_ISL_3839635,<br>EPI_ISL_3839644,<br>EPI_ISL_3839657                                                                                                                                                                                                   | Virology Department, Central Health Laboratory                                                  | Virology Department, Central Health Laboratory                                                                                                                                                                                          | Bahadoor BS; Jannoo N; Manraj SS; Mathur H; Ramuth M; Sonoo J; Sujeewon C                                                                                                                                                                                                                                                                                                                                                                                                                                                                                                                                                                                                                                  |
| EPI_ISL_1123281                                                                                                                                                                                                                                                               | Virology Laboratory of Praia                                                                    | Institut Pasteur de Dakar                                                                                                                                                                                                               | Dia Ndongo; Diagne Moussa Moise; Diallo Amadou; Diop Mamadou; Faye Ousmane; Kevin Sanders; Loucoubar Cheikh; Mbengue Safietou Sankhe; Ndiaye Ndack; Sall Amadou Alpha; Tordo Noel                                                                                                                                                                                                                                                                                                                                                                                                                                                                                                                          |
| EPI_ISL_3506353                                                                                                                                                                                                                                                               | Virology Laboratory, International Centre for Diarrhoeal Disease Research, Bangladesh (ICDDR,B) | Virology Laboratory, International Centre for Diarrhoeal Disease Research, Bangladesh (ICDDR,B)                                                                                                                                         | Md. Mahfuzur Rahman; Mohammad Enayet Hossain; Mohammed Ziaur Rahman; Mojnu Miah; Mustafizur Rahman                                                                                                                                                                                                                                                                                                                                                                                                                                                                                                                                                                                                         |
| EPI_ISL_1855000                                                                                                                                                                                                                                                               | Virology Laboratory, Scientific Department, Army Medical Center                                 | Virology Laboratory, Scientific Department, Army Medical Center                                                                                                                                                                         | Anella Monte; Anna Anselmo; Antonella Fortunato; Filippo Molinari; Florigio Lista; Francesco Giordani; Giancarlo Petralito; Giandomenico Cerreto; Riccardo De Sanctis; Silvia Fillo; Vanessa Vera Fain                                                                                                                                                                                                                                                                                                                                                                                                                                                                                                     |
| EPI_ISL_677634,<br>EPI_ISL_1660265,<br>EPI_ISL_1660267,<br>EPI_ISL_1660283,<br>EPI_ISL_1660290,<br>EPI_ISL_1660310                                                                                                                                                            | Virology Unit, Institut Pasteur de Madagascar                                                   | Virology Unit, Institut Pasteur de Madagascar                                                                                                                                                                                           | Angela Brisebarre; Camille Capel; Cara E. Brook; Christian Ranaivoson; Christophe Malabat; Corinne Maufrais; Cristina M. Tato; Emmanuelle Pernal; Etienne Simon-Lorière; Frédéric Lemoine; Helisoa Razafimanjato; Jean-Michel Heraud; Joseph L. DeRisi; Louise Lefrançois; Marion Barbet; Maud Vanpeene; Michelle Tan; Méline Bizard; Norosoa Razanajatovo; Philippe Dussart; Soa Fy Andriamandimby; Sylvie Behillili; Sylvie van der Werf; Tsiry Randriambolamanantsoa; Vida Ahyong; Vincent Enouf; Vololoniaina Raharinosy                                                                                                                                                                               |
| EPI_ISL_1532805, EPI_ISL_1532815, EPI_ISL_1706602, EPI_ISL_1711980, EPI_ISL_1969684, EPI_ISL_2106247, EPI_ISL_2106262, EPI_ISL_2231577, EPI_ISL_2406476, EPI_ISL_2693927, EPI_ISL_3045595, EPI_ISL_3387384, EPI_ISL_3570901                                                   | see above                                                                                       | Virology Unit, Institut Pasteur du Cambodge                                                                                                                                                                                             | Cecile Troupin; Chau Darapeak; Chin Savuth; Erik A Karlsson; Jurre Y Siegers; Kraing Sidonn; Leakhena Pum; Ly Sovann; Sokhoun Yann; Sophoannadeth Rath; Teyputita Ou; Veasna Duong; Yi Sengdoeurn                                                                                                                                                                                                                                                                                                                                                                                                                                                                                                          |
| EPI_ISL_411902                                                                                                                                                                                                                                                                | Virology Unit, Institut Pasteur du Cambodge.                                                    | Virology Unit, Institut Pasteur du Cambodge (Sequencing done by: Jessica E Manning/Jennifer A Bohl at Malaria and Vector Research Research Laboratory, National Institute of Allergy and Infectious Diseases and Vida Ahyong from Chan- | Erik A Karlsson; Jennifer A Bohl; Jessica E Manning.; Philippe Dussart; Veasna Duong; Vida Ahyong                                                                                                                                                                                                                                                                                                                                                                                                                                                                                                                                                                                                          |

|                                                                                                                                                                                                                                                                                                                                                                                     |                                                                                                           |                                                                                                                                                                                                                                          |                                                                                                                                                                                                                                                                                                                                                                                                                                                                                                                                                                                                                                                                                                                                                                                                                                                                                                                                               |
|-------------------------------------------------------------------------------------------------------------------------------------------------------------------------------------------------------------------------------------------------------------------------------------------------------------------------------------------------------------------------------------|-----------------------------------------------------------------------------------------------------------|------------------------------------------------------------------------------------------------------------------------------------------------------------------------------------------------------------------------------------------|-----------------------------------------------------------------------------------------------------------------------------------------------------------------------------------------------------------------------------------------------------------------------------------------------------------------------------------------------------------------------------------------------------------------------------------------------------------------------------------------------------------------------------------------------------------------------------------------------------------------------------------------------------------------------------------------------------------------------------------------------------------------------------------------------------------------------------------------------------------------------------------------------------------------------------------------------|
| EPI_ISL_2140348                                                                                                                                                                                                                                                                                                                                                                     | Vitomed Sp. z o.o.                                                                                        | Zuckerberg Biohub)<br>1. Tricity SARS-CoV-2 sequencing consortium: University of Gdansk, Medical University of Gdansk, Vaxican Ltd., Invicta Ltd. 2. National Institute of Public Health - National Institute of Hygiene, Warsaw, Poland | Celina Cybulska; Karolina Gackowska; Katarzyna Groth; Katarzyna Zacharczuk; Krystyna Bienkowska Szewczyk; Lukasz Rabalski; Maciej Grzybek; Maciej Kosinski; Magdalena Nowakowska; Małgorzata Sadkowska-Todys; Tomasz Wolkowicz                                                                                                                                                                                                                                                                                                                                                                                                                                                                                                                                                                                                                                                                                                                |
| EPI_ISL_3867292, EPI_ISL_3867300, EPI_ISL_3867303, EPI_ISL_3867310, EPI_ISL_3867311, EPI_ISL_3867312                                                                                                                                                                                                                                                                                | WACCBIP, University of Ghana                                                                              | WACCBIP, University of Ghana                                                                                                                                                                                                             | Abdul-Karim Abass; Bright K. Yemi; Collins M. Morang'a; Deborah N. A. Mettle; Dennis Adu-Gyasi; Dominic S. Y. Amuzu; Edward Danso Fenteng; Emmanuel Kudjo; Emmanuella Amoako; Evelyn B. Quansah; Frederick Tei-Maya; Israel Osei-Wusu; Joe K. Mutungi; Joyce M. Ngoi; Kwado Poku Asante; Lawrence Ofori-Boadu; Lucas N. Amenga-Etego; Michael Owusu; Nicaise T. Ndam; Oliver Commey; Oliver D. Boakyee; Patrick Tetteh Ababio; Paul Owusu-Oduro; Peter K. Quashie; Philip M. Soglo; Richard Odame Phillips; Samirah Said; Samuel Armoo; Samuel Kaba Akoriyea; Sylvester Dassah; Theophilus Odoom; Victor Asoala; Vincent Appiah; Violette V. M'cormack; William K. Ampofo; Yaw Bediako; and Gordon A. Awandare                                                                                                                                                                                                                                |
| EPI_ISL_2836897, EPI_ISL_2836916, EPI_ISL_2836918, EPI_ISL_2836953, EPI_ISL_2968009, EPI_ISL_2968012, EPI_ISL_3268047, EPI_ISL_3268050, EPI_ISL_3268100, EPI_ISL_3268122, EPI_ISL_3268124                                                                                                                                                                                           | see above                                                                                                 | WACCBIP, University of Ghana, Volta Road, Legon-Accra, Ghana                                                                                                                                                                             | ; Bright K. Yemi; Collins M. Morang'a; Deborah N. A. Mettle; Dominic S. Y. Amuzu; Dominic S.Y. Amuzu; Evelyn B. Quansah; Evelyn Y. Bonney; Frederick M. Tei-Maya; Frederick Tei-Maya; Israel Osei-Wusu; Ivy A. Asante; Joe K. Mutungi; John K. Odoom; Joseph H.K. Bonney; Joyce M. Ngoi; Lawrence Ofori-Boadu; Lucas N. Amenga-Etego; Lucas N. Amenga-Etego; Gordon A. Awandare; Michael Owusu; Mildred Adusei-Poku; Nicaise T. Ndam; Oliver Commey; Paul Owusu-Oduro; Peter K. Quashie; Philip M. Soglo; Richard Odame Phillips; Samirah Said; Samuel Armoo; Sylvester Dassah; Victor Asoala; Vincent Appiah; Violette V. M'cormack; Violette V. M'cormack; William K. Ampofo; Yaw Bediako; and Gordon A. Awandare                                                                                                                                                                                                                           |
| EPI_ISL_3268105                                                                                                                                                                                                                                                                                                                                                                     | WACCBIP, University of Ghana, Volta Road, Legon-Accra, Ghana                                              | WACCBIP, University of Ghana, Volta Road, Legon-Accra, Ghana                                                                                                                                                                             | ; Bright K. Yemi; Collins M. Morang'a; Deborah N. A. Mettle; Dominic S. Y. Amuzu; Evelyn B. Quansah; Frederick M. Tei-Maya; Israel Osei-Wusu; Joe K. Mutungi; Joyce M. Ngoi; Lucas N. Amenga-Etego; Michael Owusu; Nicaise T. Ndam; Oliver Commey; Paul Owusu-Oduro; Peter K. Quashie; Philip M. Soglo; Richard Odame Phillips; Samirah Said; Samuel Armoo; Sylvester Dassah; Victor Asoala; Vincent Appiah; Violette V. M'cormack; William K. Ampofo; Yaw Bediako; and Gordon A. Awandare                                                                                                                                                                                                                                                                                                                                                                                                                                                    |
| EPI_ISL_2385177, EPI_ISL_2816183, EPI_ISL_3454793, EPI_ISL_3454797, EPI_ISL_3454801                                                                                                                                                                                                                                                                                                 | WHO National Influenza Centre Russian Federation                                                          | WHO National Influenza Centre Russian Federation                                                                                                                                                                                         | Alexey Masharsky; Andrey Komissarov; Artem Fadeev; Daria Danilenko; Dmitry Lioznov; Elena Nabieva; Georgii Bazykin; Kirill Varchenko; Ksenia Safina; Kseniya Komissarova; Maria Baturova; Maria Pisareva; Maria Timofeeva; Mikhail Bakaev; Nikita Yolsin; Oksana Stanevich; Oula Mansour; Oula Masour; Tamila Musavea; Veronika Eder                                                                                                                                                                                                                                                                                                                                                                                                                                                                                                                                                                                                          |
| EPI_ISL_3446540, EPI_ISL_3446541                                                                                                                                                                                                                                                                                                                                                    | WHO/Country Office in the Republic of Moldova                                                             | Charité Universitätsmedizin Berlin, Institut für Virologie                                                                                                                                                                               | Ala Halacu; Barbara Mühlemann; Christian Drostén; Julia Schneider; Jörn Beheim-Schwarzbach; Mariana Apostol; Talitha Veith; Terry Jones; Victor M Corman                                                                                                                                                                                                                                                                                                                                                                                                                                                                                                                                                                                                                                                                                                                                                                                      |
| EPI_ISL_3838171                                                                                                                                                                                                                                                                                                                                                                     | WSSE Katowice                                                                                             | Wojewódzka Stacja Sanitarno-Epidemiologiczna w Katowicach                                                                                                                                                                                | Beata Rozwadowska                                                                                                                                                                                                                                                                                                                                                                                                                                                                                                                                                                                                                                                                                                                                                                                                                                                                                                                             |
| EPI_ISL_754811                                                                                                                                                                                                                                                                                                                                                                      | Wadsworth Center, New York State Department of Health                                                     | Wadsworth Center, New York State Department of Health                                                                                                                                                                                    | Alexis Russel; Daryl M. Lamson; Erasmus Schneider; Erica Lasek-Nesselquist; John Kelly; Jonathan Plitnick; Kirsten St. George; Matthew Shudt; Melissa A Leisner; Navjot Singh; Sara Griesemer                                                                                                                                                                                                                                                                                                                                                                                                                                                                                                                                                                                                                                                                                                                                                 |
| EPI_ISL_456193, EPI_ISL_548102, EPI_ISL_649124, EPI_ISL_2103200, EPI_ISL_2964929                                                                                                                                                                                                                                                                                                    | Waikato Hospital                                                                                          | Institute of Environmental Science and Research (ESR)                                                                                                                                                                                    | Anja Werno; Antje van der Linden; Arlo Upton; Chris Mansell; David Hammer; Dragana Drinkovic; Erasmus Smit; Gary McAuliffe; Hana Sofia Andersson; Hermes Perez; James Ussher; Jill Sherwood; Jing Wang; Joep de Ligt; Josh Freeman; Julia Howard; Juliet Elvy; Lauren Jelly; Mary DeAlmeida; Matt Blakiston; Matt Storey; Matthew Rogers; Max Bloomfield; Michael Addidle; Michelle Balm; Muhammad Faisal; Nikki Freed; Olin Silander; Olivia Stroeven; Rachel Boyle; Sally Roberts; SallyAnn Harbison; Sarah Jefferies; Sharmini Muttaiyah; Susan Morpeth; Susan Taylor; Timothy Blackmore; Vani Sathyendran; Veronica Playle; Virginia Hope; Xiaoyun Ren                                                                                                                                                                                                                                                                                    |
| EPI_ISL_3656831                                                                                                                                                                                                                                                                                                                                                                     | Washington State Department of Health Public Health Laboratories                                          | Washington State Department of Health Public Health Laboratories                                                                                                                                                                         | Avi Singh; Darren Lucas; Denny Russell; Drew MacKellar; Geoff Melly; Hannah Gray; Joenice Gonzalez; JohnAric Peterson; Philip Dykema; Rebecca Cao; Vanessa De Los Santos                                                                                                                                                                                                                                                                                                                                                                                                                                                                                                                                                                                                                                                                                                                                                                      |
| EPI_ISL_456165, EPI_ISL_456188, EPI_ISL_456334                                                                                                                                                                                                                                                                                                                                      | Wellington SCL                                                                                            | Institute of Environmental Science and Research (ESR)                                                                                                                                                                                    | Anja Werno; Antje van der Linden; Arlo Upton; Chris Mansell; David Hammer; Dragana Drinkovic; Erasmus Smit; Gary McAuliffe; Hana Sofia Andersson; James Ussher; Jill Sherwood; Joep de Ligt; Josh Freeman; Julia Howard; Juliet Elvy; Lauren Jelly; Mary DeAlmeida; Matt Blakiston; Matt Storey; Matthew Rogers; Max Bloomfield; Michael Addidle; Michelle Balm; Muhammad Faisal; Nikki Freed; Olin Silander; Olivia Stroeven; Rachel Boyle; Sally Roberts; SallyAnn Harbison; Sarah Jefferies; Sharmini Muttaiyah; Susan Morpeth; Susan Taylor; Timothy Blackmore; Vani Sathyendran; Veronica Playle; Virginia Hope; Xiaoyun Ren                                                                                                                                                                                                                                                                                                             |
| EPI_ISL_649125, EPI_ISL_1016878, EPI_ISL_1250695, EPI_ISL_2964931, EPI_ISL_2964938, EPI_ISL_2964939, EPI_ISL_2964940, EPI_ISL_3164093, EPI_ISL_3164098, EPI_ISL_3164099, EPI_ISL_3164102, EPI_ISL_3164103, EPI_ISL_3164104, EPI_ISL_3164106, EPI_ISL_3164109, EPI_ISL_3664455, EPI_ISL_3664456, EPI_ISL_3709185, EPI_ISL_3709188, EPI_ISL_3709190, EPI_ISL_3709192, EPI_ISL_3709194 | see above                                                                                                 | Wellington SCL (WN)                                                                                                                                                                                                                      | Anja Werno; Antje van der Linden; Arlo Upton; Chris Mansell; David Hammer; Dragana Drinkovic; Erasmus Smit; Gary McAuliffe; Hana Sofia Andersson; Hermes Perez; James Ussher; Jill Sherwood; Jing Wang; Joep de Ligt; Josh Freeman; Julia Howard; Juliet Elvy; Lauren Jelly; Mary DeAlmeida; Matt Blakiston; Matt Storey; Matthew Rogers; Max Bloomfield; Michael Addidle; Michelle Balm; Muhammad Faisal; Nikki Freed; Olin Silander; Olivia Stroeven; Rachel Boyle; Sally Roberts; SallyAnn Harbison; Sarah Jefferies; Sharmini Muttaiyah; Susan Morpeth; Susan Taylor; Timothy Blackmore; Vani Sathyendran; Veronica Playle; Virginia Hope; Xiaoyun Ren                                                                                                                                                                                                                                                                                    |
| EPI_ISL_1255176, EPI_ISL_1255251                                                                                                                                                                                                                                                                                                                                                    | West African Centre for Cell Biology of Infectious Pathogens (WACCBIP), University of Ghana, Accra, Ghana | West African Centre for Cell Biology of Infectious Pathogens (WACCBIP), University of Ghana, Volta Road, Legon-Accra, Ghana                                                                                                              | ; Abdoulaye B Diallo; Abdul-Karim Abass; Aisha Mohammed; Benjamin Demah Nuerthey; Collins M. Morang'a; Dam Kenneth Mibut; Dominic S.Y. Amuzu; Emmanuella Amoako4; Evelyn B. Quansah; Frederick Kumi-Ansah; Frederick Tei-Maya; Gordon A Awandare; Joyce M. Ngoi; Kesego Tapela; Lucas N. Amenga-Etego; Nelson Kibinge; Oliver D Boakyee; Peter K Quashie; Philip M. Soglo; Samirah Said; Samuel Kaba Akoriyea; Theophilus Odoom; Vanessa Magnussen; Vincent Appiah; Yaw Bediako                                                                                                                                                                                                                                                                                                                                                                                                                                                               |
| EPI_ISL_3091525                                                                                                                                                                                                                                                                                                                                                                     | Wexner Medical Center                                                                                     | The Ohio State University College of Medicine                                                                                                                                                                                            | Aidja, Z.; Koenig, S.                                                                                                                                                                                                                                                                                                                                                                                                                                                                                                                                                                                                                                                                                                                                                                                                                                                                                                                         |
| EPI_ISL_1921876                                                                                                                                                                                                                                                                                                                                                                     | Wichita State University - Molecular Diagnostics Lab                                                      | Kansas Health and Environmental Lab                                                                                                                                                                                                      | Ben Olsen; Jonathan Barnell; Mike Grose; and Phil Adam                                                                                                                                                                                                                                                                                                                                                                                                                                                                                                                                                                                                                                                                                                                                                                                                                                                                                        |
| EPI_ISL_2833939                                                                                                                                                                                                                                                                                                                                                                     | Wichita State University- Molecular Diagnostic Lab                                                        | Kansas Health and Environmental Lab                                                                                                                                                                                                      | Ben Olsen; Jonathan Barnell; Katherine Wiggins; Mike Grose; and Phil Adam                                                                                                                                                                                                                                                                                                                                                                                                                                                                                                                                                                                                                                                                                                                                                                                                                                                                     |
| EPI_ISL_3398275                                                                                                                                                                                                                                                                                                                                                                     | Willis-Knighton Medical Center Hospital Laboratory                                                        | LSUHS Emerging Viral Threat Laboratory                                                                                                                                                                                                   | Alexander Mijalis; Andrew D. Yurochko; April N. Johnson; Christopher G. Kevill; Gregory L. Ware; Jennifer L. Carroll; Jeremy P. Kamil; John A. Vanchiere; Joseph A. Bocchini; Lorie M. Atkins; Maarten Van Diest; Rona S. Scott                                                                                                                                                                                                                                                                                                                                                                                                                                                                                                                                                                                                                                                                                                               |
| EPI_ISL_3131926                                                                                                                                                                                                                                                                                                                                                                     | Wisconsin State Laboratory of Hygiene Communicable Disease Division                                       | Wisconsin State Laboratory of Hygiene Communicable Disease Division                                                                                                                                                                      | Abigail C. Shockey; Alicia J. Mooney; Erika M. Hanson; Kelsey R. Florek; Richard Griesser; Sara Wagner; Tonya Danz                                                                                                                                                                                                                                                                                                                                                                                                                                                                                                                                                                                                                                                                                                                                                                                                                            |
| EPI_ISL_2142039                                                                                                                                                                                                                                                                                                                                                                     | Wojewódzki Specjalistyczny Szpital im. dr Wł. Biegańskiego                                                | 1. National Institute of Public Health - National Institute of Hygiene; 2. Eurofins Genomics Europe Sequencing GmbH                                                                                                                      | ECDC COVID-19 WGS support team; Eurofins Genomics Europe Sequencing Team; Gierczyński Rafał; Sadkowska-Todys Małgorzata; Wolkowicz Tomasz; Zacharczuk Katarzyna                                                                                                                                                                                                                                                                                                                                                                                                                                                                                                                                                                                                                                                                                                                                                                               |
| EPI_ISL_402130                                                                                                                                                                                                                                                                                                                                                                      | Wuhan Jinyintan Hospital                                                                                  | Wuhan Institute of Virology, Chinese Academy of Sciences                                                                                                                                                                                 | Ding-Yu Zhang; Hao-Rui Si; Lei Zhang; Peng Zhou; Xing-Lou Yang; Yan Zhu; Zhengli Shi                                                                                                                                                                                                                                                                                                                                                                                                                                                                                                                                                                                                                                                                                                                                                                                                                                                          |
| EPI_ISL_1335800, EPI_ISL_2226826, EPI_ISL_2247990, EPI_ISL_3062475, EPI_ISL_3751174, EPI_ISL_3758804                                                                                                                                                                                                                                                                                | Wyoming Public Health Laboratory                                                                          | Wyoming Public Health Laboratory                                                                                                                                                                                                         | Ashley Norberg; Brian Dominguez; Brittany Oher; Cari Sloma; Channing Weber; Chayse Rowley; Elliot Thomasson; Jim Mildenberger; Lynette Gumbleton; Marley Goetz; Noah Hull; Robert Petit; Sam Britz; Taylor Fearing; Wanda Manley; and Rob Christensen                                                                                                                                                                                                                                                                                                                                                                                                                                                                                                                                                                                                                                                                                         |
| EPI_ISL_2159597, EPI_ISL_2296466                                                                                                                                                                                                                                                                                                                                                    | Yale Clinical Virology Lab                                                                                | Grubaugh Lab - Yale School of Public Health                                                                                                                                                                                              | Anderson Brito; Annie Watkins; Chaney Kalinich; Chantal Vogels; Isabel Ott; Jessica Rothman; Joseph Fauver; Mallery Breban; Marie L. Landry; Mary Petrone; Nathan Grubaugh; Tara Alpert                                                                                                                                                                                                                                                                                                                                                                                                                                                                                                                                                                                                                                                                                                                                                       |
| EPI_ISL_3188967, EPI_ISL_3188998                                                                                                                                                                                                                                                                                                                                                    | ZANGIATA INFECTIOUS CLINICAL HOSPITAL №2                                                                  | Biotechnology laboratory, Center for advanced technology                                                                                                                                                                                 | Abzor Abdurakhimov; Alisher Abdullaev; Dilbar Dalimova; Diyora Dalimova; Elena Tsay; Gul Esonova; Ibragimova Shahnoza; Shakhlo Turdikulova; Sharof Nuriddinov; Vladimir Tsoy; Zebinisa Mirakbarova                                                                                                                                                                                                                                                                                                                                                                                                                                                                                                                                                                                                                                                                                                                                            |
| EPI_ISL_3098925                                                                                                                                                                                                                                                                                                                                                                     | ZOL                                                                                                       | Jessa                                                                                                                                                                                                                                    | Berden et al. on behalf of the jessa_cmdLab                                                                                                                                                                                                                                                                                                                                                                                                                                                                                                                                                                                                                                                                                                                                                                                                                                                                                                   |
| EPI_ISL_666626, EPI_ISL_3210091                                                                                                                                                                                                                                                                                                                                                     | ZOTZ KLIMAS MVZ Düsseldorf-Centrum GbR ÜBAG für Labormedizin, Genetik, Zytologie, Pathologie              | Center of Medical Microbiology, Virology, and Hospital Hygiene, University of Duesseldorf                                                                                                                                                | Alexander Dilthey; Andreas Walker; Ashley-Jane Duplessis; Daniel Strelow; Jessica Nicolai; Jörg Timm; Katrin Hoffmann; Klaus Pfeffer; Lisanna Hülse; Malte Kohns Vasconcelos; Marek Korencak; Maximilian Damagnez; Nadine Lübke; Patrick Finzer; Rainer Zotz; Tobias Wienemann; Torsten Houwaart                                                                                                                                                                                                                                                                                                                                                                                                                                                                                                                                                                                                                                              |
| EPI_ISL_2726784                                                                                                                                                                                                                                                                                                                                                                     | Zakład Mikrobiologii Klinicznej WSZ im dr R. Ostrowskiego w Koninie                                       | 1. National Institute of Public Health - National Institute of Hygiene, Warsaw, Poland 2. Biobank Lab, University of Lodz 3. Laboratory of Respiratory Viruses, Teaching and Clinical Center of the Medical University of Lodz           | Dominik Strapagiel; Izabela Dróżdż; Jakub Lach; Katarzyna Zacharczuk; Klaudyna Królikowska; Maciej Borowiec; Magdalena Nowakowska; Magdalena Traczky-Borszyńska; Marcin Słomka; Marta Sobalska-Kwapis; Małgorzata Sadkowska-Todys; Tomasz Płoszaj; Tomasz Wolkowicz                                                                                                                                                                                                                                                                                                                                                                                                                                                                                                                                                                                                                                                                           |
| EPI_ISL_2859301                                                                                                                                                                                                                                                                                                                                                                     | Zamboanga City Medical Center GeneXpert Laboratory                                                        | Philippine Genome Center                                                                                                                                                                                                                 | Alethea R. de Guzman; Anna Ong-Lim; Arianne A. Zamora; Benedict A. Maralit; Carlo M. Lapid; Celia Carlos; Devon Ray Pacial; Diomedes A. Carino; Edsel Maurice Salvaña; El King D. Morado; Elcid Aaron R. Pangilinan; Eva Maria Cutiongco-de la Paz; Francis A. Tablizo; Henrietta Marie Rodriguez; Jaime C. Montoya; Jan Michael C. Yap; Jarvin E. Nipales; Jo-Hannah S. Llames; John Q. Wong; Joshua Gregor A. Dizon; Juan Antonio R. Magalang; Karol Sophia Agape R. Padilla; Kenneth M. Kim; Kris P. Punayan; Krisitna Patriz Dela Cruz; Lindsay Claire D.L. Carandang; Ma. Exanil Planting; Marc Edsel C. Ayes; Maria Rosario Singh-Vergeire and Cynthia P. Saloma; Maria Sofia L. Yangzon; Marielle M Gamboa; Marissa Alejandria; Nina Francesca Bustamante; Razel Nikka M. Hao; Renato Jacinto Q. Mantaring; Rianna Patricia S. Cruz; Sheila Mae M. Araiza; Yvonne Valerie Austria; Zipporah Mariebelle R. Enriquez; Zyrrel V. Mollejon |
| EPI_ISL_3739792, EPI_ISL_3739828                                                                                                                                                                                                                                                                                                                                                    | Zavod za javno zdravstvo Koprivničko-križevačke županije                                                  | Hrvatski zavod za javno zdravstvo                                                                                                                                                                                                        | Irena Tabain; Ivana Ferenčak                                                                                                                                                                                                                                                                                                                                                                                                                                                                                                                                                                                                                                                                                                                                                                                                                                                                                                                  |
| EPI_ISL_2674054, EPI_ISL_3046416                                                                                                                                                                                                                                                                                                                                                    | Zavod za javno zdravstvo Međimurske županije                                                              | Hrvatski zavod za javno zdravstvo                                                                                                                                                                                                        | Irena Tabain; Ivana Ferenčak                                                                                                                                                                                                                                                                                                                                                                                                                                                                                                                                                                                                                                                                                                                                                                                                                                                                                                                  |
| EPI_ISL_3620769                                                                                                                                                                                                                                                                                                                                                                     | Zavod za javno zdravstvo Zagrebačke županije                                                              | Hrvatski zavod za javno zdravstvo                                                                                                                                                                                                        | Irena Tabain; Ivana Ferenčak                                                                                                                                                                                                                                                                                                                                                                                                                                                                                                                                                                                                                                                                                                                                                                                                                                                                                                                  |
| EPI_ISL_2674389, EPI_ISL_2674390, EPI_ISL_2693542                                                                                                                                                                                                                                                                                                                                   | Zavod za javno zdravstvo Šibensko- Knianske županije                                                      | Hrvatski zavod za javno zdravstvo                                                                                                                                                                                                        | Irena Tabain; Ivana Ferenčak                                                                                                                                                                                                                                                                                                                                                                                                                                                                                                                                                                                                                                                                                                                                                                                                                                                                                                                  |
| EPI_ISL_3506278                                                                                                                                                                                                                                                                                                                                                                     | Zdravotni ústav Ústí nad Labem                                                                            | Institute of Medical Microbiology and Virology,                                                                                                                                                                                          | Alexa Laubner; Alexander Dalpke; Anett Zabzinski; Eva Patrasová; Fabian Rost; Grit Mehnert; Ivana Stiborová; Jitka Pohořská; Johanna Bell; Lenka Šimůnková; Leo Büttner; Marlena Stadtmüller; Montserrat Palau de Miquel; Romana Mikešová; Susanne Reinhardt; Sylke Winkler; Sylvia                                                                                                                                                                                                                                                                                                                                                                                                                                                                                                                                                                                                                                                           |

|                                                                                                                                        |                     |                                                                                               |                                                                                                                                                                                                                                                                                                                                                                                                                                                                                                                                                                                                                                                                                                                                                                                                                                                    |
|----------------------------------------------------------------------------------------------------------------------------------------|---------------------|-----------------------------------------------------------------------------------------------|----------------------------------------------------------------------------------------------------------------------------------------------------------------------------------------------------------------------------------------------------------------------------------------------------------------------------------------------------------------------------------------------------------------------------------------------------------------------------------------------------------------------------------------------------------------------------------------------------------------------------------------------------------------------------------------------------------------------------------------------------------------------------------------------------------------------------------------------------|
| EPI_ISL_3855348                                                                                                                        | Zentrallabor Zürich | University Hospital Carl Gustav Carus, TU Dresden<br>Institute of Medical Virology            | Alexandra Trkola; Annette Audigé; Catharine Aquino; Cyril Shah; Daniel Ehrsam; Gabriela Ziltener; Guido Bloemberg; Hubert Rehrauer; Isabel Stürmer; Joel Wirz; Jon Huder; Jürg Böni; Kevin Steiner; Maria Grünberg; Maryam Zaheri; Michael Huber; Riccarda Capaul; Stefan Schmutz; Verena Kufner; Weihong Qi                                                                                                                                                                                                                                                                                                                                                                                                                                                                                                                                       |
| EPI_ISL_2115844                                                                                                                        | amedes MVZ Hannover | Robert Koch Institute                                                                         | Klemroth<br><br>Agnar Helgason; Alma Moller; Arna B Agustsdottir; Arnaldur Gylfason; Asgeir Sigurdsson; Aslaug Jonasdottir; Berglind Eiriksdothir; Bjarni Thorbjornsson; Brynjar O Jensson; Daniel F Gudbjartsson; Droplaug N Magnusdottir; Elisabet E Gardarsdottir; Emil A Thorarensen; Gardar Sveinbjornsson; Gisli Masson; Gudmundur Georgsson; Gudmundur L Norddahl; Gudrun Sigmundsdottir; Hakon Jonsson; Hannes Eggertsson; Hilma Holm; Ingileif Jonsdottir; Jona Saemundsdottir; Kamilla S Josefsdottir; Karl Stefansson; Karl G Kristinnsson; Kjartan R Gudmundsson; Kristin E Sveinsdottir; Louise le Roux; Maney Sveinsdottir; Olafia S Gretarsdottir; Olafur T Magnusson; Pall Melsted; Patrick Sulem; Run Fridriksdottir; Solvi Rognvaldsson; Thora R Gunnarsdottir; Thordur Kristjansson; Thorolfur Gudnason; Unnur Thorsteinsdottir |
| EPI_ISL_829062                                                                                                                         | deCODE genetics     | deCODE genetics                                                                               |                                                                                                                                                                                                                                                                                                                                                                                                                                                                                                                                                                                                                                                                                                                                                                                                                                                    |
| EPI_ISL_447637                                                                                                                         | unknown             | Department of Medicine                                                                        |                                                                                                                                                                                                                                                                                                                                                                                                                                                                                                                                                                                                                                                                                                                                                                                                                                                    |
| EPI_ISL_437614,<br>EPI_ISL_437618,<br>EPI_ISL_437624                                                                                   | unknown             | Faculty of Medicine                                                                           |                                                                                                                                                                                                                                                                                                                                                                                                                                                                                                                                                                                                                                                                                                                                                                                                                                                    |
| EPI_ISL_507011                                                                                                                         | unknown             | Infectious Diseases Research, King Abdullah<br>International Medical Research Center (KAIMRC) | Bampali, M.; Dovrolis, N.; Froukala, E.; Gatzidou, E.; Kassela, K.; N. and Karakasiliotis, I.; Spanakis; Stavropoulou, A.; Tsakris, A.; Veletza, S.<br>Buathong, R.; Bunprakob, S.; Ghai, S.; Joyjinda, Y.; Mungaomklang, A.; Petcharat, S.; Plipat; Prasithsirikul, W.; Rodpan, A.; Sirichan, N.; T. and Hemachudha, T.; Wacharapluesadee, S.                                                                                                                                                                                                                                                                                                                                                                                                                                                                                                     |
| EPI_ISL_450412                                                                                                                         | unknown             | Microbiology                                                                                  | Alghoribi; M.F.                                                                                                                                                                                                                                                                                                                                                                                                                                                                                                                                                                                                                                                                                                                                                                                                                                    |
| EPI_ISL_483060                                                                                                                         | unknown             | Microbiology, Canterbury Health Laboratories                                                  | K.-Y.; K.K.W.; To; Yuen                                                                                                                                                                                                                                                                                                                                                                                                                                                                                                                                                                                                                                                                                                                                                                                                                            |
| EPI_ISL_3417525, EPI_ISL_3417526, EPI_ISL_3417527, EPI_ISL_3417528, EPI_ISL_3417529, EPI_ISL_3417530, EPI_ISL_3417531, EPI_ISL_3417532 |                     |                                                                                               | Anderson, T.; Dilcher, M.                                                                                                                                                                                                                                                                                                                                                                                                                                                                                                                                                                                                                                                                                                                                                                                                                          |
| see above                                                                                                                              | unknown             | PHV-FSS                                                                                       | Chenwei Wang on behalf of Q-PHIRE Genomics                                                                                                                                                                                                                                                                                                                                                                                                                                                                                                                                                                                                                                                                                                                                                                                                         |
